# Supplementary material for: Draft Sequencing Crested Wheatgrass Chromosomes Identified Evolutionary Structural Changes and Genes and Facilitated the Development of SSR Markers
Source: MDPI journal article supplement (doi:10.3390/ijms23063191), 2022-03-16
Supplement: s1 [file s1]

**Table S2:** The most frequent genes annotated in the draft assemblies of *Agropyron cristatum*.

| Chromosome | Frequency | Annotated genes                                                                                                                                                                                                                                                                                                                                                                                                                                 |
|------------|-----------|-------------------------------------------------------------------------------------------------------------------------------------------------------------------------------------------------------------------------------------------------------------------------------------------------------------------------------------------------------------------------------------------------------------------------------------------------|
| 1P         | 6         | Protein phosphatase PP2A regulatory subunit B                                                                                                                                                                                                                                                                                                                                                                                                   |
|            | 4         | Arginine--tRNA ligase   Phosphomethylpyrimidine synthase                                                                                                                                                                                                                                                                                                                                                                                        |
|            | 3         | 30S ribosomal protein S3   CTP synthase   Enolase   Formin-like protein 3   Kinesin-like protein KIN-14K   Ornithine aminotransferase   Polyamine oxidase 5   Protein RecA   Senescence-specific cysteine protease SAG39   Succinate--CoA ligase [ADP-forming] subunit beta   Superoxide dismutase [Mn]   Thymidylate synthase   Uroporphyrinogen decarboxylase   Very-long-chain aldehyde decarbonylase GL1-7   V-type proton ATPase subunit D |
| 2P         | 9         | Amidase 1                                                                                                                                                                                                                                                                                                                                                                                                                                       |
|            | 8         | Deoxyuridine 5'-triphosphate nucleotidohydrolase   Nuclear/nucleolar GTPase 2                                                                                                                                                                                                                                                                                                                                                                   |
|            | 6         | Germin-like protein 8-5                                                                                                                                                                                                                                                                                                                                                                                                                         |
|            | 5         | Cortical cell-delineating protein   Ent-kaur-16-ene synthase   Non-specific lipid-transfer protein 2G   Probable nicotianamine synthase 2                                                                                                                                                                                                                                                                                                       |
| 3P         | 16        | Glucan endo-1                                                                                                                                                                                                                                                                                                                                                                                                                                   |
|            | 14        | Rust resistance kinase Lr10                                                                                                                                                                                                                                                                                                                                                                                                                     |
|            | 13        | Putative glutaredoxin-C2                                                                                                                                                                                                                                                                                                                                                                                                                        |
|            | 11        | Protein DETOXIFICATION 40                                                                                                                                                                                                                                                                                                                                                                                                                       |
|            | 10        | Cationic peroxidase SPC4                                                                                                                                                                                                                                                                                                                                                                                                                        |
|            | 9         | 16.9 kDa class I heat shock protein 1                                                                                                                                                                                                                                                                                                                                                                                                           |
|            | 8         | ABC transporter B family member 20   Amino-acid permease BAT1 homolog   Sugar transport protein MST3                                                                                                                                                                                                                                                                                                                                            |

| Chromosome | Frequency | Annotated genes                                                                                                                                                                                                                                                                                                                                                                                                                           |
|------------|-----------|-------------------------------------------------------------------------------------------------------------------------------------------------------------------------------------------------------------------------------------------------------------------------------------------------------------------------------------------------------------------------------------------------------------------------------------------|
|            | 7         | Abscisic stress-ripening protein 1   Germin-like protein 1-3   Germin-like protein 1-4   Zinc finger protein KNUCKLES                                                                                                                                                                                                                                                                                                                     |
| 4P         | 4         | Fructose-1   Glutamate--tRNA ligase   Oxygen-dependent coproporphyrinogen-III oxidase   Phosphoenolpyruvate carboxykinase (ATP)                                                                                                                                                                                                                                                                                                           |
|            | 3         | Adenylate kinase   Bifunctional purine biosynthesis protein   Elongation factor G   Glyceraldehyde-3-phosphate dehydrogenase   H/ACA ribonucleoprotein complex subunit CBF5   Isoleucine--tRNA ligase   Malate dehydrogenase   Multidrug resistance protein CDR1   Ornithine aminotransferase   Phosphoribosylaminoimidazole carboxylase   Probable peptidyl-prolyl cis-trans isomerase   Serine hydroxymethyltransferase   Transaldolase |
| 5P         | 15        | Putative ripening-related protein 4                                                                                                                                                                                                                                                                                                                                                                                                       |
|            | 9         | Probable aldo-keto reductase 2                                                                                                                                                                                                                                                                                                                                                                                                            |
|            | 8         | DEAD-box ATP-dependent RNA helicase 38   Deoxyuridine 5'-triphosphate nucleotidohydrolase                                                                                                                                                                                                                                                                                                                                                 |
|            | 7         | ATP synthase subunit alpha   DEAD-box ATP-dependent RNA helicase 1   Membrane protein PM19L                                                                                                                                                                                                                                                                                                                                               |
|            | 6         | ATP-dependent zinc metalloprotease FTSH 4   Auxin-responsive protein SAUR36   Carotenoid 9   Histone H4   Phenylalanine ammonia-lyase   Tryptophan aminotransferase-related protein 1                                                                                                                                                                                                                                                     |
| 6P         | 7         | ATP synthase subunit alpha   High-affinity nitrate transporter 2.2   S-(+)-linalool synthase                                                                                                                                                                                                                                                                                                                                              |
|            | 6         | Callose synthase 3   Histone H2B.2   Histone H4   Senescence-specific cysteine protease SAG39                                                                                                                                                                                                                                                                                                                                             |
|            | 5         | Bidirectional sugar transporter SWEET14   Cinnamoyl-CoA reductase 1   DExH-box ATP-dependent RNA helicase DExH12   L-arabinokinase   Probable O-methyltransferase 2   Protein H2A.6                                                                                                                                                                                                                                                       |
| 7P         | 12        | ABC transporter C family member 10                                                                                                                                                                                                                                                                                                                                                                                                        |
|            | 5         | Guanine nucleotide-binding protein alpha-1 subunit                                                                                                                                                                                                                                                                                                                                                                                        |
|            | 4         | Callose synthase 10   Replication factor C subunit 1                                                                                                                                                                                                                                                                                                                                                                                      |
|            | 3         | ABC transporter B family member 20   Auxin response factor 12   Callose synthase 5   Exopolysaccharide synthase   Kinesin-like protein KIN-14L   Kinesin-like protein KIN-UB   Leucine--tRNA ligase   MADS-box transcription factor 27   Pre-                                                                                                                                                                                             |

| Chromosome | Frequency | Annotated genes                                                                                                                                                                            |
|------------|-----------|--------------------------------------------------------------------------------------------------------------------------------------------------------------------------------------------|
|            |           | mRNA-splicing factor ATP-dependent RNA helicase DEAH1   Probable metal-nicotianamine transporter YSL9   Protein translocase subunit SecA   Transcription initiation factor TFIID subunit 5 |
