# Supplementary material for: Draft Sequencing Crested Wheatgrass Chromosomes Identified Evolutionary Structural Changes and Genes and Facilitated the Development of SSR Markers
Source: Int J Mol Sci. 2022 Mar 16;23(6):3191. doi: 10.3390/ijms23063191 (PMC8948999; doi:10.3390/ijms23063191)
Supplement: Supplementary file 1 [file ijms-23-03191-s001.zip]

Archive with 7 entries (7 files):
- FigureS1.tif
- FigureS2.tif
- TableS1.xlsx
- TableS2.pdf
- TableS3.xlsx
- TableS4.xlsx
- TableS5.xlsx
