# Supplementary material for: Draft Sequencing Crested Wheatgrass Chromosomes Identified Evolutionary Structural Changes and Genes and Facilitated the Development of SSR Markers
Source: Int J Mol Sci. 2022 Mar 16;23(6):3191. doi: 10.3390/ijms23063191 (PMC8948999; doi:10.3390/ijms23063191)
Supplement: Supplementary file 1 [file ijms-23-03191-s001.zip › TableS1.xlsx]

## Sheet: Table S1
Table S1: Proportion of genic and repetitive DNA sequences identified in the draft chromosome assemblies of A. cristatum.
			Proportional representation in context of draft assemblies [%]
			1P	2P	3P	4P	5P	6P	7P
GENES total			6.16	3.49	4.03	11.93	4.32	3.55	3.1
REPETITIVE ELEMENTS total			65.65	81.18	79.96	39.21	79.75	77.93	79.09
		Lineage/class
LTR retroelements	Ty1/Copia	Sire-Maximus	2.84	6.66	6.19	1.72	6.28	5.49	4.38
		Angela	5.78	7.44	8.2	1.94	8.22	6.26	7.53
		TAR	0.2	0.74	0.68	0.16	0.59	0.73	0.42
		Tork	0.01	0.04	0.04	0.02	0.02	0.05	0.03
		Bianca	0.04	0.05	0.06	0.01	0.05	0.04	0.06
		Ale	0.01	0.07	0.1	0.01	0.11	0.1	0.05
		Total Ty1/Copia	8.88	15	16.17	3.86	15.27	12.67	12.47
	Ty3/Gypsy	Athila	34.28	26.14	21.98	22.88	23.1	26.79	40.3
		Chromovirideae	6.33	5.45	5.82	1.47	5.88	5.51	3.68
		Ogre-Tat	2.31	6.44	7.8	0.54	8.15	5.17	2.53
		Total Ty3/Gypsy	42.92	38.03	35.6	24.89	37.13	37.47	46.51
Unclassified LTR elements			1.74	4.69	4.59	0.7	4.48	4.72	2.68
Other	LINE		0.17	0.4	0.46	0.09	0.42	0.39	0.38
	DNA transposons		1.38	3.32	3.32	1.06	3.33	3.44	3.14
	Tandem repeats		1.42	2.11	1.98	0.73	1.86	2.08	1.99
	rRNA genes		0.02	0.01	0.01	0.07	0.02	0.01	0
	Simple repeats		3.58	4.05	4.6	4.44	4.75	4.01	3.83
Unclassified repeats			4.64	12.51	12.09	2.36	11.3	12.11	6.87
Caulimoviridea			0.04	0.02	0.02	0.06	0.03	0.02	0.07
Low complexity			0.86	1.04	1.12	0.95	1.16	1.01	1.15
