# Supplementary material for: Draft Sequencing Crested Wheatgrass Chromosomes Identified Evolutionary Structural Changes and Genes and Facilitated the Development of SSR Markers
Source: Int J Mol Sci. 2022 Mar 16;23(6):3191. doi: 10.3390/ijms23063191 (PMC8948999; doi:10.3390/ijms23063191)
Supplement: Supplementary file 1 [file ijms-23-03191-s001.zip › TableS3.xlsx]

## Sheet: 1P
Table S3: Overview of annotated genes in the draft assemblies of Agropyron cristatum.
Chromosome position	Scaffold name	Start position	End position	Annotated genes
AGROCRI.1P.000001.1	1P.scaffold-675	3093	4778	Protein of unknown function
AGROCRI.1P.000002.1	1P.scaffold-675	4837	17681	Glutamate--tRNA ligase
AGROCRI.1P.000003.1	1P.scaffold-675	20694	41048	Protein of unknown function
AGROCRI.1P.000004.1	1P.scaffold-675	41485	52950	tRNA uridine 5-carboxymethylaminomethyl modification enzyme MnmG
AGROCRI.1P.000005.1	1P.scaffold-675	58972	64232	Protein of unknown function
AGROCRI.1P.000006.1	1P.scaffold-675	65109	69389	Probable potassium transport system protein kup
AGROCRI.1P.000007.1	1P.scaffold-675	77433	81146	UPF0051 protein slr0074
AGROCRI.1P.000008.1	1P.scaffold-13372	145	8243	50S ribosomal protein L6
AGROCRI.1P.000009.1	1P.scaffold-13372	9102	11667	30S ribosomal protein S3
AGROCRI.1P.000010.1	1P.scaffold-13372	12745	15779	Elongation factor G
AGROCRI.1P.000011.1	1P.scaffold-13372	38352	45259	Protein of unknown function
AGROCRI.1P.000012.1	1P.scaffold-13372	46705	51819	Protein of unknown function
AGROCRI.1P.000013.1	1P.scaffold-864	51	31053	Holliday junction ATP-dependent DNA helicase RuvB
AGROCRI.1P.000014.1	1P.scaffold-747	1237	4025	D-aminoacyl-tRNA deacylase
AGROCRI.1P.000015.1	1P.scaffold-747	5018	15808	Small ribosomal subunit biogenesis GTPase RsgA
AGROCRI.1P.000016.1	1P.scaffold-747	17989	24676	Glycine dehydrogenase (decarboxylating)
AGROCRI.1P.000017.1	1P.scaffold-747	25165	29475	Protein of unknown function
AGROCRI.1P.000018.1	1P.scaffold-747	34321	37115	Protein of unknown function
AGROCRI.1P.000019.1	1P.scaffold-787	62	421	50S ribosomal protein L2
AGROCRI.1P.000020.1	1P.scaffold-787	1055	20658	DNA-directed RNA polymerase subunit alpha
AGROCRI.1P.000021.1	1P.scaffold-787	22038	23237	Enolase
AGROCRI.1P.000022.1	1P.scaffold-6080	192	21057	Protein of unknown function
AGROCRI.1P.000023.1	1P.scaffold-766	3486	8967	Putative histidine biosynthesis bifunctional protein HisCD
AGROCRI.1P.000024.1	1P.scaffold-766	9650	32685	6-phosphogluconate dehydrogenase
AGROCRI.1P.000025.1	1P.scaffold-766	36454	41608	Alkaline protease secretion ATP-binding protein AprD
AGROCRI.1P.000026.1	1P.scaffold-766	64553	65734	Iron-sulfur cluster carrier protein
AGROCRI.1P.000027.1	1P.scaffold-734	228	5671	Lon protease
AGROCRI.1P.000028.1	1P.scaffold-734	8012	10342	ATP-dependent zinc metalloprotease FtsH
AGROCRI.1P.000029.1	1P.scaffold-734	11768	18452	Protein of unknown function
AGROCRI.1P.000030.1	1P.scaffold-734	20031	29463	Protein of unknown function
AGROCRI.1P.000031.1	1P.scaffold-734	33905	39737	Bifunctional purine biosynthesis protein PurH
AGROCRI.1P.000032.1	1P.scaffold-943	1216	2828	ABC transporter A family member 8
AGROCRI.1P.000033.1	1P.scaffold-943	2630	8335	Protein of unknown function
AGROCRI.1P.000034.1	1P.scaffold-943	11960	13816	Protein of unknown function
AGROCRI.1P.000035.1	1P.scaffold-701	23342	28815	Protein of unknown function
AGROCRI.1P.000036.1	1P.scaffold-701	45078	45998	Protein RecA
AGROCRI.1P.000037.1	1P.scaffold-701	46327	55843	Protein of unknown function
AGROCRI.1P.000038.1	1P.scaffold-2256	186	11329	Protein of unknown function
AGROCRI.1P.000039.1	1P.scaffold-2256	15168	27782	CTP synthase
AGROCRI.1P.000040.1	1P.scaffold-684	1268	2435	30S ribosomal protein S3
AGROCRI.1P.000041.1	1P.scaffold-684	5751	25409	Enolase
AGROCRI.1P.000042.1	1P.scaffold-6589	785	1210	Protein of unknown function
AGROCRI.1P.000043.1	1P.scaffold-6589	2725	10988	Protein of unknown function
AGROCRI.1P.000044.1	1P.scaffold-949	59	3563	Protein of unknown function
AGROCRI.1P.000045.1	1P.scaffold-949	5236	14512	Fructose-bisphosphate aldolase class 2
AGROCRI.1P.000046.1	1P.scaffold-949	14592	16063	Protein of unknown function
AGROCRI.1P.000047.1	1P.scaffold-949	25436	29658	Protein of unknown function
AGROCRI.1P.000048.1	1P.scaffold-2290	1090	5185	Serine hydroxymethyltransferase
AGROCRI.1P.000049.1	1P.scaffold-2290	5660	17761	tRNA modification GTPase MnmE
AGROCRI.1P.000050.1	1P.scaffold-40105	25446	31839	Protein of unknown function
AGROCRI.1P.000051.1	1P.scaffold-40105	32773	37921	ATP synthase subunit beta
AGROCRI.1P.000052.1	1P.scaffold-40105	46104	50355	Protein of unknown function
AGROCRI.1P.000053.1	1P.scaffold-40105	65111	66518	Acyl carrier protein
AGROCRI.1P.000054.1	1P.scaffold-40105	70761	72332	Ribose-phosphate pyrophosphokinase
AGROCRI.1P.000055.1	1P.scaffold-40105	74983	80588	Methionine--tRNA ligase
AGROCRI.1P.000056.1	1P.scaffold-286	705	2582	Protein of unknown function
AGROCRI.1P.000057.1	1P.scaffold-286	3590	6652	Protein of unknown function
AGROCRI.1P.000058.1	1P.scaffold-286	9698	12216	Protein of unknown function
AGROCRI.1P.000059.1	1P.scaffold-286	13107	14650	Protein of unknown function
AGROCRI.1P.000060.1	1P.scaffold-286	17613	21583	Protein of unknown function
AGROCRI.1P.000061.1	1P.scaffold-286	27155	27643	Protein of unknown function
AGROCRI.1P.000062.1	1P.scaffold-655	696	3470	Protein of unknown function
AGROCRI.1P.000063.1	1P.scaffold-655	12755	16610	Protein of unknown function
AGROCRI.1P.000064.1	1P.scaffold-655	18036	21061	Protein of unknown function
AGROCRI.1P.000065.1	1P.scaffold-655	22747	23904	Protein of unknown function
AGROCRI.1P.000066.1	1P.scaffold-655	28499	31177	Protein of unknown function
AGROCRI.1P.000067.1	1P.scaffold-36884	2539	6555	Protein of unknown function
AGROCRI.1P.000068.1	1P.scaffold-36884	7213	10177	Lipoyl synthase
AGROCRI.1P.000069.1	1P.scaffold-36884	11286	17687	1
AGROCRI.1P.000070.1	1P.scaffold-36884	21813	23222	Protein of unknown function
AGROCRI.1P.000071.1	1P.scaffold-641	1482	2351	Protein of unknown function
AGROCRI.1P.000072.1	1P.scaffold-641	1687	2893	Protein of unknown function
AGROCRI.1P.000073.1	1P.scaffold-641	6653	12187	Protein of unknown function
AGROCRI.1P.000074.1	1P.scaffold-641	15952	16872	Protein of unknown function
AGROCRI.1P.000075.1	1P.scaffold-641	16960	17628	Protein of unknown function
AGROCRI.1P.000076.1	1P.scaffold-641	17665	18168	Protein of unknown function
AGROCRI.1P.000077.1	1P.scaffold-641	18442	18825	Protein of unknown function
AGROCRI.1P.000078.1	1P.scaffold-641	23364	24536	Protein of unknown function
AGROCRI.1P.000079.1	1P.scaffold-641	31526	32005	Protein of unknown function
AGROCRI.1P.000080.1	1P.scaffold-1063	74	1806	Protein of unknown function
AGROCRI.1P.000081.1	1P.scaffold-1063	1766	3819	Protein of unknown function
AGROCRI.1P.000082.1	1P.scaffold-1063	4310	7020	Protein of unknown function
AGROCRI.1P.000083.1	1P.scaffold-1063	7849	9512	Protein of unknown function
AGROCRI.1P.000084.1	1P.scaffold-1063	10548	14084	Protein of unknown function
AGROCRI.1P.000085.1	1P.scaffold-826	3773	10935	Probable peptidyl-prolyl cis-trans isomerase
AGROCRI.1P.000086.1	1P.scaffold-826	11390	12232	Protein of unknown function
AGROCRI.1P.000087.1	1P.scaffold-826	15626	21676	Arginine--tRNA ligase
AGROCRI.1P.000088.1	1P.scaffold-826	37167	40850	Aminomethyltransferase
AGROCRI.1P.000089.1	1P.scaffold-858	39181	53078	Protein of unknown function
AGROCRI.1P.000090.1	1P.scaffold-858	54259	60427	Protein of unknown function
AGROCRI.1P.000091.1	1P.scaffold-7187	1107	7578	Calcium-transporting ATPase 5
AGROCRI.1P.000092.1	1P.scaffold-1096	40	2837	Protein of unknown function
AGROCRI.1P.000093.1	1P.scaffold-1096	1984	7117	Protein of unknown function
AGROCRI.1P.000094.1	1P.scaffold-1096	8580	9683	Protein of unknown function
AGROCRI.1P.000095.1	1P.scaffold-1096	10316	10684	Protein of unknown function
AGROCRI.1P.000096.1	1P.scaffold-859	767	1219	Protein of unknown function
AGROCRI.1P.000097.1	1P.scaffold-859	3336	7694	Protein of unknown function
AGROCRI.1P.000098.1	1P.scaffold-859	8233	8883	Protein of unknown function
AGROCRI.1P.000099.1	1P.scaffold-859	10191	13513	Protein of unknown function
AGROCRI.1P.000100.1	1P.scaffold-859	15764	19032	Protein of unknown function
AGROCRI.1P.000101.1	1P.scaffold-686	21989	31482	Protein of unknown function
AGROCRI.1P.000102.1	1P.scaffold-686	31534	42297	DNA ligase
AGROCRI.1P.000103.1	1P.scaffold-1404	2230	17075	5-methyltetrahydropteroyltriglutamate--homocysteine methyltransferase
AGROCRI.1P.000104.1	1P.scaffold-352	3892	5121	Protein of unknown function
AGROCRI.1P.000105.1	1P.scaffold-352	6105	6893	Protein of unknown function
AGROCRI.1P.000106.1	1P.scaffold-352	18239	20760	Protein of unknown function
AGROCRI.1P.000107.1	1P.scaffold-352	22645	25624	Protein of unknown function
AGROCRI.1P.000108.1	1P.scaffold-352	26811	28101	Protein of unknown function
AGROCRI.1P.000109.1	1P.scaffold-352	28219	29754	Protein of unknown function
AGROCRI.1P.000110.1	1P.scaffold-861	1859	2398	Protein of unknown function
AGROCRI.1P.000111.1	1P.scaffold-861	2514	7262	Protein of unknown function
AGROCRI.1P.000112.1	1P.scaffold-861	8272	13525	Protein of unknown function
AGROCRI.1P.000113.1	1P.scaffold-36641	8128	9935	Protein of unknown function
AGROCRI.1P.000114.1	1P.scaffold-36641	10822	17382	GTPase Der
AGROCRI.1P.000115.1	1P.scaffold-36641	21353	24887	Alanine--tRNA ligase
AGROCRI.1P.000116.1	1P.scaffold-36641	33205	35082	Glutamate-1-semialdehyde 2
AGROCRI.1P.000117.1	1P.scaffold-36641	35133	36704	Lysine--tRNA ligase
AGROCRI.1P.000118.1	1P.scaffold-10395	2401	6602	Translation initiation factor IF-2
AGROCRI.1P.000119.1	1P.scaffold-10395	8209	10339	Protein of unknown function
AGROCRI.1P.000120.1	1P.scaffold-10395	10992	21929	Probable dual-specificity RNA methyltransferase RlmN
AGROCRI.1P.000121.1	1P.scaffold-656	123	1800	Protein of unknown function
AGROCRI.1P.000122.1	1P.scaffold-656	2416	10232	Protein of unknown function
AGROCRI.1P.000123.1	1P.scaffold-656	14373	19923	Protein of unknown function
AGROCRI.1P.000124.1	1P.scaffold-13040	469	5351	Protein of unknown function
AGROCRI.1P.000125.1	1P.scaffold-13040	5552	7956	Protein of unknown function
AGROCRI.1P.000126.1	1P.scaffold-771	21174	23979	Protein of unknown function
AGROCRI.1P.000127.1	1P.scaffold-771	26751	29503	Protein of unknown function
AGROCRI.1P.000128.1	1P.scaffold-771	31390	38518	Protein of unknown function
AGROCRI.1P.000129.1	1P.scaffold-1044	1715	8810	4-alpha-glucanotransferase DPE2
AGROCRI.1P.000130.1	1P.scaffold-666	10265	11638	Fumarate hydratase class II
AGROCRI.1P.000131.1	1P.scaffold-666	11909	23391	Diaminopimelate epimerase
AGROCRI.1P.000132.1	1P.scaffold-666	23635	26699	Protein of unknown function
AGROCRI.1P.000133.1	1P.scaffold-695	158	19958	Protein of unknown function
AGROCRI.1P.000134.1	1P.scaffold-3656	1153	2345	Very-long-chain aldehyde decarbonylase GL1-7
AGROCRI.1P.000135.1	1P.scaffold-3656	2672	4933	Very-long-chain aldehyde decarbonylase GL1-7
AGROCRI.1P.000136.1	1P.scaffold-3656	6753	11235	Very-long-chain aldehyde decarbonylase GL1-7
AGROCRI.1P.000137.1	1P.scaffold-1231	1719	5818	Serine/arginine-rich splicing factor SR30
AGROCRI.1P.000138.1	1P.scaffold-1231	6228	6977	Protein of unknown function
AGROCRI.1P.000139.1	1P.scaffold-1231	8332	8916	Protein of unknown function
AGROCRI.1P.000140.1	1P.scaffold-748	15894	18285	Protein of unknown function
AGROCRI.1P.000141.1	1P.scaffold-748	32678	43459	Protein of unknown function
AGROCRI.1P.000142.1	1P.scaffold-34713	1974	14702	Protein of unknown function
AGROCRI.1P.000143.1	1P.scaffold-217	401	859	Protein of unknown function
AGROCRI.1P.000144.1	1P.scaffold-217	2321	12989	Protein of unknown function
AGROCRI.1P.000145.1	1P.scaffold-882	619	1222	Protein of unknown function
AGROCRI.1P.000146.1	1P.scaffold-882	3635	3799	Protein of unknown function
AGROCRI.1P.000147.1	1P.scaffold-882	5960	7912	Protein of unknown function
AGROCRI.1P.000148.1	1P.scaffold-882	10125	11288	Protein of unknown function
AGROCRI.1P.000149.1	1P.scaffold-882	12806	15475	Protein of unknown function
AGROCRI.1P.000150.1	1P.scaffold-41461	2334	20999	Adenylosuccinate synthetase
AGROCRI.1P.000151.1	1P.scaffold-6809	279	918	Protein of unknown function
AGROCRI.1P.000152.1	1P.scaffold-6809	1056	3694	Protein of unknown function
AGROCRI.1P.000153.1	1P.scaffold-6809	4609	6653	Protein of unknown function
AGROCRI.1P.000154.1	1P.scaffold-722	12546	13190	GTP-binding nuclear protein GSP1/Ran
AGROCRI.1P.000155.1	1P.scaffold-722	19561	21985	Minichromosome maintenance protein 5
AGROCRI.1P.000156.1	1P.scaffold-722	23065	25440	Endoribonuclease YSH1
AGROCRI.1P.000157.1	1P.scaffold-722	25996	28600	Protein of unknown function
AGROCRI.1P.000158.1	1P.scaffold-722	28985	30991	Translation factor GUF1
AGROCRI.1P.000159.1	1P.scaffold-722	31359	33071	Threonine dehydratase
AGROCRI.1P.000160.1	1P.scaffold-722	35060	39729	Protein of unknown function
AGROCRI.1P.000161.1	1P.scaffold-722	41551	42003	Protein of unknown function
AGROCRI.1P.000162.1	1P.scaffold-999	1978	4889	Protein of unknown function
AGROCRI.1P.000163.1	1P.scaffold-999	7000	7380	Protein of unknown function
AGROCRI.1P.000164.1	1P.scaffold-999	8125	8532	Protein of unknown function
AGROCRI.1P.000165.1	1P.scaffold-999	12061	12468	Protein of unknown function
AGROCRI.1P.000166.1	1P.scaffold-999	13213	13593	Protein of unknown function
AGROCRI.1P.000167.1	1P.scaffold-999	15704	18615	Protein of unknown function
AGROCRI.1P.000168.1	1P.scaffold-999	22529	23197	Protein of unknown function
AGROCRI.1P.000169.1	1P.scaffold-565	67	1773	Protein of unknown function
AGROCRI.1P.000170.1	1P.scaffold-565	2935	4740	Protein of unknown function
AGROCRI.1P.000171.1	1P.scaffold-565	4870	5265	Protein of unknown function
AGROCRI.1P.000172.1	1P.scaffold-565	10534	12789	Protein of unknown function
AGROCRI.1P.000173.1	1P.scaffold-565	22203	24458	Protein of unknown function
AGROCRI.1P.000174.1	1P.scaffold-490	2018	2908	Protein of unknown function
AGROCRI.1P.000175.1	1P.scaffold-490	2943	3287	Protein of unknown function
AGROCRI.1P.000176.1	1P.scaffold-490	3327	5964	Protein of unknown function
AGROCRI.1P.000177.1	1P.scaffold-490	11450	15995	Protein of unknown function
AGROCRI.1P.000178.1	1P.scaffold-905	851	4457	mRNA export factor MEX67
AGROCRI.1P.000179.1	1P.scaffold-905	4984	6167	Damage response protein 1
AGROCRI.1P.000180.1	1P.scaffold-905	11775	12958	Damage response protein 1
AGROCRI.1P.000181.1	1P.scaffold-905	13485	17091	mRNA export factor MEX67
AGROCRI.1P.000182.1	1P.scaffold-905	20567	22573	Cell division control protein 31
AGROCRI.1P.000183.1	1P.scaffold-905	22758	24005	26S proteasome subunit RPT4
AGROCRI.1P.000184.1	1P.scaffold-905	31150	31956	26S proteasome subunit RPT4
AGROCRI.1P.000185.1	1P.scaffold-9759	933	2028	Protein of unknown function
AGROCRI.1P.000186.1	1P.scaffold-9759	4259	4720	Protein of unknown function
AGROCRI.1P.000187.1	1P.scaffold-9759	5222	6782	Elongation factor 1-beta
AGROCRI.1P.000188.1	1P.scaffold-9759	7119	8978	Protein of unknown function
AGROCRI.1P.000189.1	1P.scaffold-9759	9196	9781	Nucleolar protein 56
AGROCRI.1P.000190.1	1P.scaffold-4261	344	2171	Protein of unknown function
AGROCRI.1P.000191.1	1P.scaffold-4261	4823	8219	Protein of unknown function
AGROCRI.1P.000192.1	1P.scaffold-4261	8659	10254	G-type lectin S-receptor-like serine/threonine-protein kinase B120
AGROCRI.1P.000193.1	1P.scaffold-2648	1995	2876	Protein of unknown function
AGROCRI.1P.000194.1	1P.scaffold-2648	3469	8606	Protein of unknown function
AGROCRI.1P.000195.1	1P.scaffold-38486	26617	37490	Protein of unknown function
AGROCRI.1P.000196.1	1P.scaffold-38486	37529	41032	Phosphoribosylaminoimidazole-succinocarboxamide synthase
AGROCRI.1P.000197.1	1P.scaffold-38486	42641	46117	Nicotinate phosphoribosyltransferase
AGROCRI.1P.000198.1	1P.scaffold-774	1024	6314	DNA mismatch repair protein MutL
AGROCRI.1P.000199.1	1P.scaffold-774	18033	27690	Protein of unknown function
AGROCRI.1P.000200.1	1P.scaffold-473	1193	4437	Protein of unknown function
AGROCRI.1P.000201.1	1P.scaffold-473	18640	19720	Protein of unknown function
AGROCRI.1P.000202.1	1P.scaffold-473	24965	26212	Protein of unknown function
AGROCRI.1P.000203.1	1P.scaffold-473	28674	29782	Protein of unknown function
AGROCRI.1P.000204.1	1P.scaffold-473	31746	33509	Protein of unknown function
AGROCRI.1P.000205.1	1P.scaffold-1008	25588	31813	Protein of unknown function
AGROCRI.1P.000206.1	1P.scaffold-1008	33099	38049	Uroporphyrinogen decarboxylase
AGROCRI.1P.000207.1	1P.scaffold-1008	40113	43891	Protein of unknown function
AGROCRI.1P.000208.1	1P.scaffold-1985	597	3330	Protein of unknown function
AGROCRI.1P.000209.1	1P.scaffold-1985	3248	4690	Protein of unknown function
AGROCRI.1P.000210.1	1P.scaffold-1985	7660	9122	Protein of unknown function
AGROCRI.1P.000211.1	1P.scaffold-850	6972	8210	Ornithine aminotransferase
AGROCRI.1P.000212.1	1P.scaffold-850	8656	10458	Protein of unknown function
AGROCRI.1P.000213.1	1P.scaffold-850	34543	39587	Protein of unknown function
AGROCRI.1P.000214.1	1P.scaffold-850	48960	50431	Protein of unknown function
AGROCRI.1P.000215.1	1P.scaffold-41463	4136	9432	Acetyl-coenzyme A synthetase
AGROCRI.1P.000216.1	1P.scaffold-477	73	4142	Protein of unknown function
AGROCRI.1P.000217.1	1P.scaffold-477	5716	13285	Protein of unknown function
AGROCRI.1P.000218.1	1P.scaffold-438	208	841	Transcription factor MYB86
AGROCRI.1P.000219.1	1P.scaffold-438	732	3093	Transcription factor MYB86
AGROCRI.1P.000220.1	1P.scaffold-438	16153	17600	Protein of unknown function
AGROCRI.1P.000221.1	1P.scaffold-438	18991	19536	Protein of unknown function
AGROCRI.1P.000222.1	1P.scaffold-438	20501	21754	Protein of unknown function
AGROCRI.1P.000223.1	1P.scaffold-145	372	7553	Protein of unknown function
AGROCRI.1P.000224.1	1P.scaffold-145	9170	11091	Protein of unknown function
AGROCRI.1P.000225.1	1P.scaffold-145	13541	13819	Protein of unknown function
AGROCRI.1P.000226.1	1P.scaffold-719	61	3839	Protein of unknown function
AGROCRI.1P.000227.1	1P.scaffold-719	5903	10853	Uroporphyrinogen decarboxylase
AGROCRI.1P.000228.1	1P.scaffold-719	12139	18364	Protein of unknown function
AGROCRI.1P.000229.1	1P.scaffold-1271	658	7092	Protein of unknown function
AGROCRI.1P.000230.1	1P.scaffold-1271	9654	11905	Protein of unknown function
AGROCRI.1P.000231.1	1P.scaffold-1550	1768	13644	2-succinyl-5-enolpyruvyl-6-hydroxy-3-cyclohexene-1-carboxylate synthase
AGROCRI.1P.000232.1	1P.scaffold-1124	888	4281	Protein of unknown function
AGROCRI.1P.000233.1	1P.scaffold-1124	4599	5251	Protein of unknown function
AGROCRI.1P.000234.1	1P.scaffold-1124	6754	7262	Protein of unknown function
AGROCRI.1P.000235.1	1P.scaffold-1930	12590	28254	Protein of unknown function
AGROCRI.1P.000236.1	1P.scaffold-780	13	18091	Protein of unknown function
AGROCRI.1P.000237.1	1P.scaffold-780	19995	21401	Protein of unknown function
AGROCRI.1P.000238.1	1P.scaffold-894	1369	5165	Protein of unknown function
AGROCRI.1P.000239.1	1P.scaffold-1210	1431	5067	Protein of unknown function
AGROCRI.1P.000240.1	1P.scaffold-1210	6122	12545	Protein of unknown function
AGROCRI.1P.000241.1	1P.scaffold-687	70	14135	Protein of unknown function
AGROCRI.1P.000242.1	1P.scaffold-2057	153	5242	Myosin-3
AGROCRI.1P.000243.1	1P.scaffold-138	864	10342	Protein of unknown function
AGROCRI.1P.000244.1	1P.scaffold-138	11189	11365	Protein of unknown function
AGROCRI.1P.000245.1	1P.scaffold-1101	96	689	Protein of unknown function
AGROCRI.1P.000246.1	1P.scaffold-1101	1340	1918	Protein of unknown function
AGROCRI.1P.000247.1	1P.scaffold-1101	2195	2638	Protein of unknown function
AGROCRI.1P.000248.1	1P.scaffold-1101	3899	9266	Protein of unknown function
AGROCRI.1P.000249.1	1P.scaffold-856	741	5079	Protein of unknown function
AGROCRI.1P.000250.1	1P.scaffold-856	8376	15888	Protein of unknown function
AGROCRI.1P.000251.1	1P.scaffold-1255	459	1195	Formin-like protein 3
AGROCRI.1P.000252.1	1P.scaffold-1255	1413	6280	Formin-like protein 3
AGROCRI.1P.000253.1	1P.scaffold-40562	2628	5383	Cytochrome b5
AGROCRI.1P.000254.1	1P.scaffold-40562	9224	11979	Cytochrome b5
AGROCRI.1P.000255.1	1P.scaffold-40562	12162	16427	Protein of unknown function
AGROCRI.1P.000256.1	1P.scaffold-3922	19476	26449	Chaperone protein DnaK
AGROCRI.1P.000257.1	1P.scaffold-3922	26871	31350	Protein of unknown function
AGROCRI.1P.000258.1	1P.scaffold-961	622	3973	Protein of unknown function
AGROCRI.1P.000259.1	1P.scaffold-961	5461	8171	Protein of unknown function
AGROCRI.1P.000260.1	1P.scaffold-961	13409	17593	Protein of unknown function
AGROCRI.1P.000261.1	1P.scaffold-192	776	1700	Protein of unknown function
AGROCRI.1P.000262.1	1P.scaffold-192	3142	3474	Protein of unknown function
AGROCRI.1P.000263.1	1P.scaffold-192	4358	5384	Protein of unknown function
AGROCRI.1P.000264.1	1P.scaffold-192	6442	7047	Protein of unknown function
AGROCRI.1P.000265.1	1P.scaffold-192	7955	9499	Protein of unknown function
AGROCRI.1P.000266.1	1P.scaffold-192	9559	10552	Protein of unknown function
AGROCRI.1P.000267.1	1P.scaffold-865	1878	11091	Protein of unknown function
AGROCRI.1P.000268.1	1P.scaffold-4456	738	1886	Protein of unknown function
AGROCRI.1P.000269.1	1P.scaffold-4456	2537	4839	Protein of unknown function
AGROCRI.1P.000270.1	1P.scaffold-4456	5844	9553	Protein of unknown function
AGROCRI.1P.000271.1	1P.scaffold-1959	1733	12230	Thymidylate synthase
AGROCRI.1P.000272.1	1P.scaffold-2021	28	694	Protein of unknown function
AGROCRI.1P.000273.1	1P.scaffold-2021	854	1436	Protein of unknown function
AGROCRI.1P.000274.1	1P.scaffold-2021	1586	1966	Protein of unknown function
AGROCRI.1P.000275.1	1P.scaffold-2021	2028	2423	Protein of unknown function
AGROCRI.1P.000276.1	1P.scaffold-2021	6029	8319	Protein of unknown function
AGROCRI.1P.000277.1	1P.scaffold-5544	290	7062	Protein of unknown function
AGROCRI.1P.000278.1	1P.scaffold-1279	764	4228	Protein of unknown function
AGROCRI.1P.000279.1	1P.scaffold-1279	5771	7130	Protein of unknown function
AGROCRI.1P.000280.1	1P.scaffold-835	29	13583	Serine hydroxymethyltransferase
AGROCRI.1P.000281.1	1P.scaffold-849	2019	2729	Protein of unknown function
AGROCRI.1P.000282.1	1P.scaffold-849	6682	8743	Protein of unknown function
AGROCRI.1P.000283.1	1P.scaffold-849	12358	14534	Protein of unknown function
AGROCRI.1P.000284.1	1P.scaffold-849	15035	15982	Protein of unknown function
AGROCRI.1P.000285.1	1P.scaffold-41462	779	2302	Protein phosphatase PP2A regulatory subunit B
AGROCRI.1P.000286.1	1P.scaffold-41462	22247	23770	Protein phosphatase PP2A regulatory subunit B
AGROCRI.1P.000287.1	1P.scaffold-41462	25640	25999	40S ribosomal protein S26-B
AGROCRI.1P.000288.1	1P.scaffold-41462	30590	30949	40S ribosomal protein S26-B
AGROCRI.1P.000289.1	1P.scaffold-41462	32819	34342	Protein phosphatase PP2A regulatory subunit B
AGROCRI.1P.000290.1	1P.scaffold-41462	54319	55842	Protein phosphatase PP2A regulatory subunit B
AGROCRI.1P.000291.1	1P.scaffold-41462	59065	60588	Protein phosphatase PP2A regulatory subunit B
AGROCRI.1P.000292.1	1P.scaffold-41462	76956	78479	Protein phosphatase PP2A regulatory subunit B
AGROCRI.1P.000293.1	1P.scaffold-150	3	1694	Protein of unknown function
AGROCRI.1P.000294.1	1P.scaffold-150	3139	4356	Protein of unknown function
AGROCRI.1P.000295.1	1P.scaffold-150	5680	6132	Protein of unknown function
AGROCRI.1P.000296.1	1P.scaffold-150	6162	6863	Protein of unknown function
AGROCRI.1P.000297.1	1P.scaffold-150	12007	13225	Protein of unknown function
AGROCRI.1P.000298.1	1P.scaffold-2014	2	43	Protein of unknown function
AGROCRI.1P.000299.1	1P.scaffold-2014	353	2263	Protein of unknown function
AGROCRI.1P.000300.1	1P.scaffold-2014	2303	4706	Brefeldin A-inhibited guanine nucleotide-exchange protein 5
AGROCRI.1P.000301.1	1P.scaffold-571	520	5419	Protein of unknown function
AGROCRI.1P.000302.1	1P.scaffold-571	5578	6474	Protein of unknown function
AGROCRI.1P.000303.1	1P.scaffold-571	8640	10870	Protein of unknown function
AGROCRI.1P.000304.1	1P.scaffold-7447	113	4702	Protein of unknown function
AGROCRI.1P.000305.1	1P.scaffold-7447	4808	14063	Protein of unknown function
AGROCRI.1P.000306.1	1P.scaffold-18162	65	4068	Ubiquitin carboxyl-terminal hydrolase 13
AGROCRI.1P.000307.1	1P.scaffold-5482	543	1545	Protein of unknown function
AGROCRI.1P.000308.1	1P.scaffold-5482	4923	8121	Protein of unknown function
AGROCRI.1P.000309.1	1P.scaffold-156	102	3995	Protein of unknown function
AGROCRI.1P.000310.1	1P.scaffold-156	4945	5359	Protein of unknown function
AGROCRI.1P.000311.1	1P.scaffold-244	55	1180	Protein of unknown function
AGROCRI.1P.000312.1	1P.scaffold-244	4420	9229	Protein of unknown function
AGROCRI.1P.000313.1	1P.scaffold-244	10609	14139	Protein of unknown function
AGROCRI.1P.000314.1	1P.scaffold-1845	2824	7813	Protein of unknown function
AGROCRI.1P.000315.1	1P.scaffold-1845	10246	14909	Protein of unknown function
AGROCRI.1P.000316.1	1P.scaffold-1702	42	6981	Protein of unknown function
AGROCRI.1P.000317.1	1P.scaffold-1074	1376	3846	Protein of unknown function
AGROCRI.1P.000318.1	1P.scaffold-1074	4915	10197	Protein of unknown function
AGROCRI.1P.000319.1	1P.scaffold-967	2121	11427	Protein of unknown function
AGROCRI.1P.000320.1	1P.scaffold-967	14231	15964	Protein of unknown function
AGROCRI.1P.000321.1	1P.scaffold-8774	92	1388	Protein of unknown function
AGROCRI.1P.000322.1	1P.scaffold-8774	1602	3508	Ornithine aminotransferase
AGROCRI.1P.000323.1	1P.scaffold-8774	3778	5372	Ornithine aminotransferase
AGROCRI.1P.000324.1	1P.scaffold-8774	5606	7180	Protein of unknown function
AGROCRI.1P.000325.1	1P.scaffold-970	611	7183	Protein of unknown function
AGROCRI.1P.000326.1	1P.scaffold-970	8539	13744	Protein of unknown function
AGROCRI.1P.000327.1	1P.scaffold-3009	62	2154	Protein of unknown function
AGROCRI.1P.000328.1	1P.scaffold-3009	4111	6282	Protein of unknown function
AGROCRI.1P.000329.1	1P.scaffold-3009	8835	11081	Protein of unknown function
AGROCRI.1P.000330.1	1P.scaffold-14954	12022	13704	Protein of unknown function
AGROCRI.1P.000331.1	1P.scaffold-14954	25953	27635	Protein of unknown function
AGROCRI.1P.000332.1	1P.scaffold-66	986	4015	Protein of unknown function
AGROCRI.1P.000333.1	1P.scaffold-66	6151	9360	Protein of unknown function
AGROCRI.1P.000334.1	1P.scaffold-933	1	843	Protein of unknown function
AGROCRI.1P.000335.1	1P.scaffold-933	1135	1803	Protein of unknown function
AGROCRI.1P.000336.1	1P.scaffold-933	3882	6554	Protein of unknown function
AGROCRI.1P.000337.1	1P.scaffold-933	8990	10276	Protein of unknown function
AGROCRI.1P.000338.1	1P.scaffold-4189	811	2168	Protein of unknown function
AGROCRI.1P.000339.1	1P.scaffold-4189	3001	4799	Protein of unknown function
AGROCRI.1P.000340.1	1P.scaffold-4189	9864	10902	Protein of unknown function
AGROCRI.1P.000341.1	1P.scaffold-5	13209	14241	Proline--tRNA ligase
AGROCRI.1P.000342.1	1P.scaffold-5	16169	17911	Protein of unknown function
AGROCRI.1P.000343.1	1P.scaffold-5	17988	19616	Protein of unknown function
AGROCRI.1P.000344.1	1P.scaffold-5	27961	34281	Chromosomal replication initiator protein DnaA
AGROCRI.1P.000345.1	1P.scaffold-862	4097	8711	3'(2')
AGROCRI.1P.000346.1	1P.scaffold-862	8925	11480	Protein of unknown function
AGROCRI.1P.000347.1	1P.scaffold-862	14189	14671	Glutathione peroxidase-like peroxiredoxin HYR1
AGROCRI.1P.000348.1	1P.scaffold-862	16450	17856	Protein of unknown function
AGROCRI.1P.000349.1	1P.scaffold-862	19266	21471	Ketol-acid reductoisomerase
AGROCRI.1P.000350.1	1P.scaffold-1332	2	1156	Probable chromatin-remodeling complex ATPase chain
AGROCRI.1P.000351.1	1P.scaffold-1332	1440	3029	Protein of unknown function
AGROCRI.1P.000352.1	1P.scaffold-1332	3333	6332	Probable chromatin-remodeling complex ATPase chain
AGROCRI.1P.000353.1	1P.scaffold-6116	1023	3032	Protein of unknown function
AGROCRI.1P.000354.1	1P.scaffold-6116	3375	3620	Protein of unknown function
AGROCRI.1P.000355.1	1P.scaffold-6116	3660	4247	Protein of unknown function
AGROCRI.1P.000356.1	1P.scaffold-6116	5336	5629	Protein of unknown function
AGROCRI.1P.000357.1	1P.scaffold-6116	6411	6815	Protein of unknown function
AGROCRI.1P.000358.1	1P.scaffold-6116	9235	9585	Protein of unknown function
AGROCRI.1P.000359.1	1P.scaffold-436	1229	3381	Protein of unknown function
AGROCRI.1P.000360.1	1P.scaffold-436	6490	12931	Protein of unknown function
AGROCRI.1P.000361.1	1P.scaffold-6716	1056	4741	Mitochondrial fission protein ELM1
AGROCRI.1P.000362.1	1P.scaffold-6716	4828	5740	Mitochondrial fission protein ELM1
AGROCRI.1P.000363.1	1P.scaffold-40972	18471	20903	Protein of unknown function
AGROCRI.1P.000364.1	1P.scaffold-40972	31118	40980	Protein of unknown function
AGROCRI.1P.000365.1	1P.scaffold-743	47	1979	Protein of unknown function
AGROCRI.1P.000366.1	1P.scaffold-743	4040	9866	Protein of unknown function
AGROCRI.1P.000367.1	1P.scaffold-743	13781	14467	Protein of unknown function
AGROCRI.1P.000368.1	1P.scaffold-743	17705	19462	Protein of unknown function
AGROCRI.1P.000369.1	1P.scaffold-526	738	2820	Protein of unknown function
AGROCRI.1P.000370.1	1P.scaffold-526	7594	9654	Protein of unknown function
AGROCRI.1P.000371.1	1P.scaffold-526	9703	10302	Protein of unknown function
AGROCRI.1P.000372.1	1P.scaffold-526	10458	11939	Protein of unknown function
AGROCRI.1P.000373.1	1P.scaffold-526	12617	13216	Protein of unknown function
AGROCRI.1P.000374.1	1P.scaffold-1116	6316	21436	Protein of unknown function
AGROCRI.1P.000375.1	1P.scaffold-1116	28454	28999	Translation machinery-associated protein 20
AGROCRI.1P.000376.1	1P.scaffold-1116	30406	33795	Protein of unknown function
AGROCRI.1P.000377.1	1P.scaffold-1116	35747	40456	Myosin-2
AGROCRI.1P.000378.1	1P.scaffold-1116	44695	49404	Myosin-2
AGROCRI.1P.000379.1	1P.scaffold-1116	51356	54745	Protein of unknown function
AGROCRI.1P.000380.1	1P.scaffold-1037	2279	4413	Protein of unknown function
AGROCRI.1P.000381.1	1P.scaffold-1037	6267	7843	Protein of unknown function
AGROCRI.1P.000382.1	1P.scaffold-1037	9608	10438	Protein of unknown function
AGROCRI.1P.000383.1	1P.scaffold-195	2708	4828	Protein of unknown function
AGROCRI.1P.000384.1	1P.scaffold-195	10694	11176	Protein of unknown function
AGROCRI.1P.000385.1	1P.scaffold-195	13532	14191	Protein of unknown function
AGROCRI.1P.000386.1	1P.scaffold-195	20014	22053	Protein of unknown function
AGROCRI.1P.000387.1	1P.scaffold-195	22251	22998	Protein of unknown function
AGROCRI.1P.000388.1	1P.scaffold-1147	97	5590	Protein of unknown function
AGROCRI.1P.000389.1	1P.scaffold-1147	10786	14702	Protein of unknown function
AGROCRI.1P.000390.1	1P.scaffold-688	9155	17428	Carbonic anhydrase 1
AGROCRI.1P.000391.1	1P.scaffold-688	20119	23840	6-phospho-beta-glucosidase AscB
AGROCRI.1P.000392.1	1P.scaffold-688	26677	27639	P-loop guanosine triphosphatase YjiA
AGROCRI.1P.000393.1	1P.scaffold-32672	1755	5472	Protein of unknown function
AGROCRI.1P.000394.1	1P.scaffold-32672	5959	7448	Protein of unknown function
AGROCRI.1P.000395.1	1P.scaffold-1285	10060	10701	Protein of unknown function
AGROCRI.1P.000396.1	1P.scaffold-1285	10837	12592	Protein of unknown function
AGROCRI.1P.000397.1	1P.scaffold-1285	13814	15184	Protein of unknown function
AGROCRI.1P.000398.1	1P.scaffold-1285	15260	15688	Protein of unknown function
AGROCRI.1P.000399.1	1P.scaffold-1584	15	3657	Ent-kaur-16-ene synthase
AGROCRI.1P.000400.1	1P.scaffold-1038	1	661	Protein of unknown function
AGROCRI.1P.000401.1	1P.scaffold-1038	848	2035	Protein of unknown function
AGROCRI.1P.000402.1	1P.scaffold-1038	4026	4702	Protein of unknown function
AGROCRI.1P.000403.1	1P.scaffold-1038	4914	5794	Protein of unknown function
AGROCRI.1P.000404.1	1P.scaffold-7795	1271	4822	Protein of unknown function
AGROCRI.1P.000405.1	1P.scaffold-1104	170	1612	Protein of unknown function
AGROCRI.1P.000406.1	1P.scaffold-1104	2351	2647	Protein of unknown function
AGROCRI.1P.000407.1	1P.scaffold-1104	3247	4706	Protein of unknown function
AGROCRI.1P.000408.1	1P.scaffold-1104	10831	11265	Protein of unknown function
AGROCRI.1P.000409.1	1P.scaffold-1104	11902	12570	Protein of unknown function
AGROCRI.1P.000410.1	1P.scaffold-1486	7539	9125	Protein of unknown function
AGROCRI.1P.000411.1	1P.scaffold-1486	16858	21882	Asparagine--tRNA ligase
AGROCRI.1P.000412.1	1P.scaffold-1486	23193	29595	Protein of unknown function
AGROCRI.1P.000413.1	1P.scaffold-1470	44	5086	Protein of unknown function
AGROCRI.1P.000414.1	1P.scaffold-10483	453	1572	Inositol phosphorylceramide glucuronosyltransferase 1
AGROCRI.1P.000415.1	1P.scaffold-10483	2023	5538	Protein root UVB sensitive 2
AGROCRI.1P.000416.1	1P.scaffold-1286	1014	8241	Protein of unknown function
AGROCRI.1P.000417.1	1P.scaffold-1286	8332	10376	Formyltetrahydrofolate deformylase
AGROCRI.1P.000418.1	1P.scaffold-34	2827	13375	Protein of unknown function
AGROCRI.1P.000419.1	1P.scaffold-34655	5504	7421	Protein of unknown function
AGROCRI.1P.000420.1	1P.scaffold-34655	7539	10258	Protein of unknown function
AGROCRI.1P.000421.1	1P.scaffold-759	2293	5199	Protein SAP1
AGROCRI.1P.000422.1	1P.scaffold-759	7145	15669	Protein SAP1
AGROCRI.1P.000423.1	1P.scaffold-759	20118	20906	Protein of unknown function
AGROCRI.1P.000424.1	1P.scaffold-759	39444	40880	ATP-dependent rRNA helicase RRP3
AGROCRI.1P.000425.1	1P.scaffold-759	41588	43024	ATP-dependent rRNA helicase RRP3
AGROCRI.1P.000426.1	1P.scaffold-17353	226	905	Protein of unknown function
AGROCRI.1P.000427.1	1P.scaffold-17353	981	7583	Protein of unknown function
AGROCRI.1P.000428.1	1P.scaffold-934	1521	1859	Protein of unknown function
AGROCRI.1P.000429.1	1P.scaffold-934	6394	11481	Protein of unknown function
AGROCRI.1P.000430.1	1P.scaffold-934	13812	14927	Protein of unknown function
AGROCRI.1P.000431.1	1P.scaffold-7759	1066	1954	Protein of unknown function
AGROCRI.1P.000432.1	1P.scaffold-7759	2544	3856	Protein of unknown function
AGROCRI.1P.000433.1	1P.scaffold-7759	8019	8348	Protein of unknown function
AGROCRI.1P.000434.1	1P.scaffold-3556	684	7062	Protein of unknown function
AGROCRI.1P.000435.1	1P.scaffold-742	432	3462	Protein of unknown function
AGROCRI.1P.000436.1	1P.scaffold-742	6565	7380	Protein of unknown function
AGROCRI.1P.000437.1	1P.scaffold-742	18177	21207	Protein of unknown function
AGROCRI.1P.000438.1	1P.scaffold-1756	324	4975	Protein of unknown function
AGROCRI.1P.000439.1	1P.scaffold-987	847	4833	Protein of unknown function
AGROCRI.1P.000440.1	1P.scaffold-987	8189	9738	Protein of unknown function
AGROCRI.1P.000441.1	1P.scaffold-987	11626	14139	Protein of unknown function
AGROCRI.1P.000442.1	1P.scaffold-21320	92	913	ABC transporter A family member 7
AGROCRI.1P.000443.1	1P.scaffold-21320	1824	3878	ABC transporter A family member 7
AGROCRI.1P.000444.1	1P.scaffold-763	11385	11939	Iron sulfur cluster assembly protein 1
AGROCRI.1P.000445.1	1P.scaffold-763	18126	19019	60S ribosomal protein L5
AGROCRI.1P.000446.1	1P.scaffold-763	25940	26806	Probable proteasome subunit alpha type-6
AGROCRI.1P.000447.1	1P.scaffold-763	27323	28498	Protein of unknown function
AGROCRI.1P.000448.1	1P.scaffold-763	35670	40856	Protein of unknown function
AGROCRI.1P.000449.1	1P.scaffold-763	41522	46222	Pentafunctional AROM polypeptide
AGROCRI.1P.000450.1	1P.scaffold-12726	416	3911	Protein of unknown function
AGROCRI.1P.000451.1	1P.scaffold-39164	2939	3415	Protein of unknown function
AGROCRI.1P.000452.1	1P.scaffold-39164	3794	4212	Protein of unknown function
AGROCRI.1P.000453.1	1P.scaffold-39164	7385	7803	Protein of unknown function
AGROCRI.1P.000454.1	1P.scaffold-39164	8182	8658	Protein of unknown function
AGROCRI.1P.000455.1	1P.scaffold-53	376	8016	Protein of unknown function
AGROCRI.1P.000456.1	1P.scaffold-53	525	2075	Protein of unknown function
AGROCRI.1P.000457.1	1P.scaffold-930	447	2477	Protein of unknown function
AGROCRI.1P.000458.1	1P.scaffold-930	4686	5294	Protein of unknown function
AGROCRI.1P.000459.1	1P.scaffold-930	9556	11139	Protein of unknown function
AGROCRI.1P.000460.1	1P.scaffold-2130	331	3872	Protein of unknown function
AGROCRI.1P.000461.1	1P.scaffold-2130	12003	13684	Protein of unknown function
AGROCRI.1P.000462.1	1P.scaffold-2130	14438	16430	Protein of unknown function
AGROCRI.1P.000463.1	1P.scaffold-142	14240	15869	Protein of unknown function
AGROCRI.1P.000464.1	1P.scaffold-142	16569	17045	Protein of unknown function
AGROCRI.1P.000465.1	1P.scaffold-142	20970	23136	Protein of unknown function
AGROCRI.1P.000466.1	1P.scaffold-142	23673	25361	Protein of unknown function
AGROCRI.1P.000467.1	1P.scaffold-39300	5072	8968	Protein of unknown function
AGROCRI.1P.000468.1	1P.scaffold-39300	19129	25871	Ras-like protein 1
AGROCRI.1P.000469.1	1P.scaffold-124	2032	5259	Protein of unknown function
AGROCRI.1P.000470.1	1P.scaffold-124	5499	5981	Protein of unknown function
AGROCRI.1P.000471.1	1P.scaffold-124	12423	14502	Protein of unknown function
AGROCRI.1P.000472.1	1P.scaffold-990	3608	6326	Protein of unknown function
AGROCRI.1P.000473.1	1P.scaffold-990	12555	15633	Protein of unknown function
AGROCRI.1P.000474.1	1P.scaffold-417	5209	8312	Protein of unknown function
AGROCRI.1P.000475.1	1P.scaffold-417	8867	9283	Protein of unknown function
AGROCRI.1P.000476.1	1P.scaffold-417	9724	10140	Protein of unknown function
AGROCRI.1P.000477.1	1P.scaffold-1033	589	5062	Protein of unknown function
AGROCRI.1P.000478.1	1P.scaffold-1033	6963	12262	Protein of unknown function
AGROCRI.1P.000479.1	1P.scaffold-1310	196	2396	Protein of unknown function
AGROCRI.1P.000480.1	1P.scaffold-1310	2600	2920	Protein of unknown function
AGROCRI.1P.000481.1	1P.scaffold-1310	3005	3476	Protein of unknown function
AGROCRI.1P.000482.1	1P.scaffold-1310	8116	8688	Protein of unknown function
AGROCRI.1P.000483.1	1P.scaffold-1822	37	1140	DNA-directed RNA polymerase subunit beta'
AGROCRI.1P.000484.1	1P.scaffold-1822	3592	4341	Sulfur carrier protein ThiS adenylyltransferase
AGROCRI.1P.000485.1	1P.scaffold-1822	4977	6779	Phosphomethylpyrimidine synthase
AGROCRI.1P.000486.1	1P.scaffold-1822	8609	10369	Uroporphyrinogen decarboxylase
AGROCRI.1P.000487.1	1P.scaffold-1822	12223	13506	Phosphoribosylamine--glycine ligase
AGROCRI.1P.000488.1	1P.scaffold-1822	13555	15144	Bifunctional purine biosynthesis protein PurH
AGROCRI.1P.000489.1	1P.scaffold-966	604	4372	Protein of unknown function
AGROCRI.1P.000490.1	1P.scaffold-966	4663	6633	Protein of unknown function
AGROCRI.1P.000491.1	1P.scaffold-3657	5506	6772	Protein of unknown function
AGROCRI.1P.000492.1	1P.scaffold-3657	7336	7641	Protein of unknown function
AGROCRI.1P.000493.1	1P.scaffold-3657	8219	9446	Protein of unknown function
AGROCRI.1P.000494.1	1P.scaffold-3657	10775	11666	Protein of unknown function
AGROCRI.1P.000495.1	1P.scaffold-33303	1208	8279	DNA-directed RNA polymerase I subunit 2
AGROCRI.1P.000496.1	1P.scaffold-1826	2636	4734	Protein of unknown function
AGROCRI.1P.000497.1	1P.scaffold-1826	9707	11797	Protein of unknown function
AGROCRI.1P.000498.1	1P.scaffold-626	4257	6961	Protein of unknown function
AGROCRI.1P.000499.1	1P.scaffold-626	8749	12281	Protein of unknown function
AGROCRI.1P.000500.1	1P.scaffold-626	12612	12959	Protein of unknown function
AGROCRI.1P.000501.1	1P.scaffold-626	12987	13484	Protein of unknown function
AGROCRI.1P.000502.1	1P.scaffold-2139	2647	3906	Protein of unknown function
AGROCRI.1P.000503.1	1P.scaffold-2139	4032	4905	Protein of unknown function
AGROCRI.1P.000504.1	1P.scaffold-126	1066	7964	Protein of unknown function
AGROCRI.1P.000505.1	1P.scaffold-126	9224	15579	Protein of unknown function
AGROCRI.1P.000506.1	1P.scaffold-1017	495	4305	Cell division control protein 10
AGROCRI.1P.000507.1	1P.scaffold-1017	7882	8484	Protein of unknown function
AGROCRI.1P.000508.1	1P.scaffold-1017	8865	9617	Protein of unknown function
AGROCRI.1P.000509.1	1P.scaffold-1017	13876	14549	Flap endonuclease 1
AGROCRI.1P.000510.1	1P.scaffold-33966	7665	9793	Protein of unknown function
AGROCRI.1P.000511.1	1P.scaffold-33966	10280	12821	Protein of unknown function
AGROCRI.1P.000512.1	1P.scaffold-33966	14296	14679	Protein of unknown function
AGROCRI.1P.000513.1	1P.scaffold-2832	79	6430	Bifunctional protein FolD
AGROCRI.1P.000514.1	1P.scaffold-2832	6771	9575	Bifunctional protein FolD
AGROCRI.1P.000515.1	1P.scaffold-6622	16	1277	Protein of unknown function
AGROCRI.1P.000516.1	1P.scaffold-6622	1923	4151	Protein of unknown function
AGROCRI.1P.000517.1	1P.scaffold-799	4026	7564	Protein of unknown function
AGROCRI.1P.000518.1	1P.scaffold-799	7879	9228	Protein of unknown function
AGROCRI.1P.000519.1	1P.scaffold-799	22054	23403	Protein of unknown function
AGROCRI.1P.000520.1	1P.scaffold-799	23718	24788	Protein of unknown function
AGROCRI.1P.000521.1	1P.scaffold-799	25863	26933	Protein of unknown function
AGROCRI.1P.000522.1	1P.scaffold-799	27248	28597	Protein of unknown function
AGROCRI.1P.000523.1	1P.scaffold-1046	3	251	Protein of unknown function
AGROCRI.1P.000524.1	1P.scaffold-1046	1660	2010	Protein of unknown function
AGROCRI.1P.000525.1	1P.scaffold-1046	3220	4401	Protein of unknown function
AGROCRI.1P.000526.1	1P.scaffold-1046	4864	5265	Protein of unknown function
AGROCRI.1P.000527.1	1P.scaffold-1046	5912	6694	Protein of unknown function
AGROCRI.1P.000528.1	1P.scaffold-1046	7527	8075	Protein of unknown function
AGROCRI.1P.000529.1	1P.scaffold-2765	222	3189	Protein of unknown function
AGROCRI.1P.000530.1	1P.scaffold-2765	3404	4894	Protein of unknown function
AGROCRI.1P.000531.1	1P.scaffold-2765	5970	6762	Protein of unknown function
AGROCRI.1P.000532.1	1P.scaffold-2795	2234	4412	Protein of unknown function
AGROCRI.1P.000533.1	1P.scaffold-2795	10686	14794	Protein of unknown function
AGROCRI.1P.000534.1	1P.scaffold-974	3	2255	Protein of unknown function
AGROCRI.1P.000535.1	1P.scaffold-974	5089	6213	Protein of unknown function
AGROCRI.1P.000536.1	1P.scaffold-974	8329	9099	Protein of unknown function
AGROCRI.1P.000537.1	1P.scaffold-974	11966	16161	Protein of unknown function
AGROCRI.1P.000538.1	1P.scaffold-974	18187	19401	Protein of unknown function
AGROCRI.1P.000539.1	1P.scaffold-10449	683	4365	Protein of unknown function
AGROCRI.1P.000540.1	1P.scaffold-10449	10421	16542	Protein of unknown function
AGROCRI.1P.000541.1	1P.scaffold-10141	153	2624	Nucleolin 2
AGROCRI.1P.000542.1	1P.scaffold-912	95	4649	Probable glutamyl endopeptidase
AGROCRI.1P.000543.1	1P.scaffold-33742	3543	6677	Protein of unknown function
AGROCRI.1P.000544.1	1P.scaffold-33742	8572	10500	Protein of unknown function
AGROCRI.1P.000545.1	1P.scaffold-33742	12996	17492	Protein of unknown function
AGROCRI.1P.000546.1	1P.scaffold-33742	23387	24724	Protein of unknown function
AGROCRI.1P.000547.1	1P.scaffold-1322	517	2870	Protein of unknown function
AGROCRI.1P.000548.1	1P.scaffold-1322	3842	10962	Protein of unknown function
AGROCRI.1P.000549.1	1P.scaffold-679	791	4070	Protein of unknown function
AGROCRI.1P.000550.1	1P.scaffold-679	13301	15166	Protein of unknown function
AGROCRI.1P.000551.1	1P.scaffold-657	11030	13809	Glutathione reductase
AGROCRI.1P.000552.1	1P.scaffold-657	17202	22097	Oligopeptidase A
AGROCRI.1P.000553.1	1P.scaffold-657	22161	26109	Protein of unknown function
AGROCRI.1P.000554.1	1P.scaffold-1053	1194	2662	Protein of unknown function
AGROCRI.1P.000555.1	1P.scaffold-1053	3868	4095	Protein of unknown function
AGROCRI.1P.000556.1	1P.scaffold-1053	4675	6990	Protein of unknown function
AGROCRI.1P.000557.1	1P.scaffold-1890	584	3510	Protein of unknown function
AGROCRI.1P.000558.1	1P.scaffold-779	3731	7142	Cysteine--tRNA ligase
AGROCRI.1P.000559.1	1P.scaffold-779	7225	12084	Protein of unknown function
AGROCRI.1P.000560.1	1P.scaffold-1370	1031	10052	Fructose-1
AGROCRI.1P.000561.1	1P.scaffold-2038	822	5413	Protein of unknown function
AGROCRI.1P.000562.1	1P.scaffold-103	1458	3419	Protein of unknown function
AGROCRI.1P.000563.1	1P.scaffold-103	7710	10949	Protein of unknown function
AGROCRI.1P.000564.1	1P.scaffold-6230	1164	5388	Protein of unknown function
AGROCRI.1P.000565.1	1P.scaffold-336	522	1966	Protein of unknown function
AGROCRI.1P.000566.1	1P.scaffold-336	4426	4686	Protein of unknown function
AGROCRI.1P.000567.1	1P.scaffold-336	8455	10562	Protein of unknown function
AGROCRI.1P.000568.1	1P.scaffold-623	202	1140	Protein of unknown function
AGROCRI.1P.000569.1	1P.scaffold-623	2163	4311	Protein of unknown function
AGROCRI.1P.000570.1	1P.scaffold-623	7774	11054	Protein of unknown function
AGROCRI.1P.000571.1	1P.scaffold-368	5835	8113	Protein of unknown function
AGROCRI.1P.000572.1	1P.scaffold-368	8923	9255	Protein of unknown function
AGROCRI.1P.000573.1	1P.scaffold-368	10289	10966	Protein of unknown function
AGROCRI.1P.000574.1	1P.scaffold-368	15478	15702	Protein of unknown function
AGROCRI.1P.000575.1	1P.scaffold-7512	60	3398	Protein of unknown function
AGROCRI.1P.000576.1	1P.scaffold-7512	3702	4216	Protein of unknown function
AGROCRI.1P.000577.1	1P.scaffold-769	9681	10235	Ribosome biogenesis protein BRX1
AGROCRI.1P.000578.1	1P.scaffold-769	14866	20089	Exosome complex exonuclease DIS3
AGROCRI.1P.000579.1	1P.scaffold-769	20569	22425	Protein of unknown function
AGROCRI.1P.000580.1	1P.scaffold-769	22980	23231	Cytochrome c oxidase subunit 6B
AGROCRI.1P.000581.1	1P.scaffold-35469	8049	10374	Protein of unknown function
AGROCRI.1P.000582.1	1P.scaffold-35469	12254	14579	Protein of unknown function
AGROCRI.1P.000583.1	1P.scaffold-5823	765	1098	Protein of unknown function
AGROCRI.1P.000584.1	1P.scaffold-5823	7153	7837	Protein of unknown function
AGROCRI.1P.000585.1	1P.scaffold-5823	8954	9929	Putative cysteine-rich receptor-like protein kinase 35
AGROCRI.1P.000586.1	1P.scaffold-3129	2314	7044	Protein of unknown function
AGROCRI.1P.000587.1	1P.scaffold-1130	2457	4128	Protein of unknown function
AGROCRI.1P.000588.1	1P.scaffold-1130	13728	17499	Protein of unknown function
AGROCRI.1P.000589.1	1P.scaffold-1170	3668	14470	Protein of unknown function
AGROCRI.1P.000590.1	1P.scaffold-1296	3869	14409	Protein of unknown function
AGROCRI.1P.000591.1	1P.scaffold-704	217	10659	Protein of unknown function
AGROCRI.1P.000592.1	1P.scaffold-15336	2462	5606	Protein of unknown function
AGROCRI.1P.000593.1	1P.scaffold-15336	7132	7539	Protein of unknown function
AGROCRI.1P.000594.1	1P.scaffold-15336	8891	9398	Protein of unknown function
AGROCRI.1P.000595.1	1P.scaffold-1414	272	2902	Kinesin-like protein KIN-14K
AGROCRI.1P.000596.1	1P.scaffold-1414	3632	4147	Kinesin-like protein KIN-14K
AGROCRI.1P.000597.1	1P.scaffold-3102	6119	8164	Prolyl endopeptidase
AGROCRI.1P.000598.1	1P.scaffold-3102	9671	14217	Adenosylhomocysteinase
AGROCRI.1P.000599.1	1P.scaffold-3102	27242	30067	Phosphomethylpyrimidine synthase
AGROCRI.1P.000600.1	1P.scaffold-1256	1469	4828	Protein of unknown function
AGROCRI.1P.000601.1	1P.scaffold-1256	8652	9957	Protein of unknown function
AGROCRI.1P.000602.1	1P.scaffold-36208	314	5595	Phenylalanine--tRNA ligase beta subunit
AGROCRI.1P.000603.1	1P.scaffold-963	1897	2985	Protein of unknown function
AGROCRI.1P.000604.1	1P.scaffold-963	5083	9153	Protein of unknown function
AGROCRI.1P.000605.1	1P.scaffold-293	46	1334	Protein of unknown function
AGROCRI.1P.000606.1	1P.scaffold-293	1220	5047	Protein of unknown function
AGROCRI.1P.000607.1	1P.scaffold-792	4088	4441	Pre-mRNA-splicing factor 18
AGROCRI.1P.000608.1	1P.scaffold-792	8007	11815	Protein of unknown function
AGROCRI.1P.000609.1	1P.scaffold-446	169	4905	Protein of unknown function
AGROCRI.1P.000610.1	1P.scaffold-446	5433	5753	Protein of unknown function
AGROCRI.1P.000611.1	1P.scaffold-665	152	1876	Maltodextrin phosphorylase
AGROCRI.1P.000612.1	1P.scaffold-665	9528	11975	Glycogen phosphorylase
AGROCRI.1P.000613.1	1P.scaffold-665	12326	13759	Glycogen synthase
AGROCRI.1P.000614.1	1P.scaffold-665	14013	15260	Glucose-1-phosphate adenylyltransferase
AGROCRI.1P.000615.1	1P.scaffold-665	15306	16913	Glycogen debranching enzyme
AGROCRI.1P.000616.1	1P.scaffold-529	2247	4991	Protein of unknown function
AGROCRI.1P.000617.1	1P.scaffold-529	9235	11979	Protein of unknown function
AGROCRI.1P.000618.1	1P.scaffold-1079	82	3674	Protein of unknown function
AGROCRI.1P.000619.1	1P.scaffold-1079	6635	11871	Protein of unknown function
AGROCRI.1P.000620.1	1P.scaffold-134	433	738	Protein of unknown function
AGROCRI.1P.000621.1	1P.scaffold-134	805	1057	Protein of unknown function
AGROCRI.1P.000622.1	1P.scaffold-134	1563	2285	Protein of unknown function
AGROCRI.1P.000623.1	1P.scaffold-134	2799	3051	Protein of unknown function
AGROCRI.1P.000624.1	1P.scaffold-134	3118	3423	Protein of unknown function
AGROCRI.1P.000625.1	1P.scaffold-27	2	5312	Phosphoinositide phosphatase SAC6
AGROCRI.1P.000626.1	1P.scaffold-154	3805	4332	Protein of unknown function
AGROCRI.1P.000627.1	1P.scaffold-154	4679	9155	Protein of unknown function
AGROCRI.1P.000628.1	1P.scaffold-154	14578	15168	Protein of unknown function
AGROCRI.1P.000629.1	1P.scaffold-2419	68	568	Protein of unknown function
AGROCRI.1P.000630.1	1P.scaffold-2419	3912	5551	Protein of unknown function
AGROCRI.1P.000631.1	1P.scaffold-5181	79	686	Protein of unknown function
AGROCRI.1P.000632.1	1P.scaffold-5181	957	3565	Protein of unknown function
AGROCRI.1P.000633.1	1P.scaffold-682	651	998	Protein of unknown function
AGROCRI.1P.000634.1	1P.scaffold-682	6710	9247	Protein of unknown function
AGROCRI.1P.000635.1	1P.scaffold-682	10025	11802	Protein of unknown function
AGROCRI.1P.000636.1	1P.scaffold-996	7064	7765	Protein of unknown function
AGROCRI.1P.000637.1	1P.scaffold-996	9561	11557	Protein of unknown function
AGROCRI.1P.000638.1	1P.scaffold-996	14618	14971	Protein of unknown function
AGROCRI.1P.000639.1	1P.scaffold-996	17135	19192	Protein of unknown function
AGROCRI.1P.000640.1	1P.scaffold-116	1107	2408	Protein of unknown function
AGROCRI.1P.000641.1	1P.scaffold-116	4895	7964	Protein of unknown function
AGROCRI.1P.000642.1	1P.scaffold-116	9200	9892	Protein of unknown function
AGROCRI.1P.000643.1	1P.scaffold-36002	1058	3475	Protein of unknown function
AGROCRI.1P.000644.1	1P.scaffold-1062	544	2283	ATP-dependent rRNA helicase SPB4
AGROCRI.1P.000645.1	1P.scaffold-1062	2788	4113	Protein of unknown function
AGROCRI.1P.000646.1	1P.scaffold-1062	6495	9897	Protein of unknown function
AGROCRI.1P.000647.1	1P.scaffold-1062	11732	15050	Protein of unknown function
AGROCRI.1P.000648.1	1P.scaffold-1064	109	3230	Protein of unknown function
AGROCRI.1P.000649.1	1P.scaffold-1064	4265	7561	V-type proton ATPase subunit a3
AGROCRI.1P.000650.1	1P.scaffold-90	1173	1727	Protein of unknown function
AGROCRI.1P.000651.1	1P.scaffold-90	2530	4077	Protein of unknown function
AGROCRI.1P.000652.1	1P.scaffold-90	5181	6233	Protein of unknown function
AGROCRI.1P.000653.1	1P.scaffold-90	6387	8201	Protein of unknown function
AGROCRI.1P.000654.1	1P.scaffold-42	1220	2688	Protein of unknown function
AGROCRI.1P.000655.1	1P.scaffold-42	7546	12189	Protein of unknown function
AGROCRI.1P.000656.1	1P.scaffold-4569	689	6430	Phosphatidylinositol 4-phosphate 5-kinase 9
AGROCRI.1P.000657.1	1P.scaffold-7841	1	399	Protein of unknown function
AGROCRI.1P.000658.1	1P.scaffold-7841	846	1563	Protein of unknown function
AGROCRI.1P.000659.1	1P.scaffold-7841	1834	2327	Protein of unknown function
AGROCRI.1P.000660.1	1P.scaffold-9555	2135	5768	Protein of unknown function
AGROCRI.1P.000661.1	1P.scaffold-1154	151	1665	Protein of unknown function
AGROCRI.1P.000662.1	1P.scaffold-1154	2210	11430	Protein of unknown function
AGROCRI.1P.000663.1	1P.scaffold-6097	3	804	DNA-directed RNA polymerases II
AGROCRI.1P.000664.1	1P.scaffold-6097	1096	2098	DNA-directed RNA polymerases II
AGROCRI.1P.000665.1	1P.scaffold-2084	69	2460	Protein of unknown function
AGROCRI.1P.000666.1	1P.scaffold-2084	3624	7053	Protein of unknown function
AGROCRI.1P.000667.1	1P.scaffold-1031	3786	4313	Protein of unknown function
AGROCRI.1P.000668.1	1P.scaffold-1031	5678	7513	Protein of unknown function
AGROCRI.1P.000669.1	1P.scaffold-1031	9789	11654	Protein of unknown function
AGROCRI.1P.000670.1	1P.scaffold-2451	277	3955	Protein of unknown function
AGROCRI.1P.000671.1	1P.scaffold-450	257	1815	Protein of unknown function
AGROCRI.1P.000672.1	1P.scaffold-450	3237	14892	Protein of unknown function
AGROCRI.1P.000673.1	1P.scaffold-3528	50	5428	CTP synthase
AGROCRI.1P.000674.1	1P.scaffold-649	3871	8399	Protein of unknown function
AGROCRI.1P.000675.1	1P.scaffold-649	9863	10471	Protein of unknown function
AGROCRI.1P.000676.1	1P.scaffold-128	196	1435	Protein of unknown function
AGROCRI.1P.000677.1	1P.scaffold-128	5060	5383	Protein of unknown function
AGROCRI.1P.000678.1	1P.scaffold-128	8002	8791	Protein of unknown function
AGROCRI.1P.000679.1	1P.scaffold-28400	5140	9682	Protein of unknown function
AGROCRI.1P.000680.1	1P.scaffold-531	2054	2758	Protein of unknown function
AGROCRI.1P.000681.1	1P.scaffold-531	6228	11968	Protein of unknown function
AGROCRI.1P.000682.1	1P.scaffold-13002	31	881	Protein of unknown function
AGROCRI.1P.000683.1	1P.scaffold-13002	1499	3601	Protein of unknown function
AGROCRI.1P.000684.1	1P.scaffold-615	742	1677	Protein of unknown function
AGROCRI.1P.000685.1	1P.scaffold-615	4166	9856	Protein of unknown function
AGROCRI.1P.000686.1	1P.scaffold-4770	1379	3639	Protein of unknown function
AGROCRI.1P.000687.1	1P.scaffold-4770	9656	10472	Protein of unknown function
AGROCRI.1P.000688.1	1P.scaffold-465	1571	3567	Protein of unknown function
AGROCRI.1P.000689.1	1P.scaffold-465	3808	4335	Protein of unknown function
AGROCRI.1P.000690.1	1P.scaffold-465	5762	9223	Protein of unknown function
AGROCRI.1P.000691.1	1P.scaffold-24349	30	2271	Protein of unknown function
AGROCRI.1P.000692.1	1P.scaffold-24349	10505	21128	Protein of unknown function
AGROCRI.1P.000693.1	1P.scaffold-16	2993	9546	Serine/threonine-protein kinase SSN3
AGROCRI.1P.000694.1	1P.scaffold-16	11799	14241	Acetyl-CoA acetyltransferase IA
AGROCRI.1P.000695.1	1P.scaffold-16	14765	15346	Acetyl-CoA acetyltransferase IA
AGROCRI.1P.000696.1	1P.scaffold-810	4003	7182	Protein of unknown function
AGROCRI.1P.000697.1	1P.scaffold-810	7875	11591	Protein of unknown function
AGROCRI.1P.000698.1	1P.scaffold-810	16632	18293	Protein of unknown function
AGROCRI.1P.000699.1	1P.scaffold-810	32212	32745	Nascent polypeptide-associated complex subunit alpha
AGROCRI.1P.000700.1	1P.scaffold-810	35195	36571	Protein of unknown function
AGROCRI.1P.000701.1	1P.scaffold-5625	555	4890	Protein of unknown function
AGROCRI.1P.000702.1	1P.scaffold-409	1	1796	Protein of unknown function
AGROCRI.1P.000703.1	1P.scaffold-409	2772	3296	Protein of unknown function
AGROCRI.1P.000704.1	1P.scaffold-409	4076	4507	Protein of unknown function
AGROCRI.1P.000705.1	1P.scaffold-409	5345	5668	Protein of unknown function
AGROCRI.1P.000706.1	1P.scaffold-751	2435	3166	Hybrid peroxiredoxin hyPrx5
AGROCRI.1P.000707.1	1P.scaffold-751	5467	6840	Argininosuccinate lyase
AGROCRI.1P.000708.1	1P.scaffold-751	7034	8254	Argininosuccinate synthase
AGROCRI.1P.000709.1	1P.scaffold-751	13258	14472	Phosphoenolpyruvate carboxylase
AGROCRI.1P.000710.1	1P.scaffold-751	15698	19296	Bifunctional aspartokinase/homoserine dehydrogenase 2
AGROCRI.1P.000711.1	1P.scaffold-401	2325	7114	Protein of unknown function
AGROCRI.1P.000712.1	1P.scaffold-41627	3139	8497	Protein of unknown function
AGROCRI.1P.000713.1	1P.scaffold-1043	1	929	Auxin response factor 3
AGROCRI.1P.000714.1	1P.scaffold-1043	1522	5889	Protein of unknown function
AGROCRI.1P.000715.1	1P.scaffold-194	26	1423	Protein of unknown function
AGROCRI.1P.000716.1	1P.scaffold-194	2638	6103	Protein of unknown function
AGROCRI.1P.000717.1	1P.scaffold-276	29	1201	Protein of unknown function
AGROCRI.1P.000718.1	1P.scaffold-276	6383	10789	Protein of unknown function
AGROCRI.1P.000719.1	1P.scaffold-276	19665	25121	Protein of unknown function
AGROCRI.1P.000720.1	1P.scaffold-10670	125	4913	Protein of unknown function
AGROCRI.1P.000721.1	1P.scaffold-6909	854	2691	Protein of unknown function
AGROCRI.1P.000722.1	1P.scaffold-6909	3732	6530	Protein of unknown function
AGROCRI.1P.000723.1	1P.scaffold-11947	3	415	Protein of unknown function
AGROCRI.1P.000724.1	1P.scaffold-11947	1180	3646	MAP3K epsilon protein kinase 1
AGROCRI.1P.000725.1	1P.scaffold-548	429	4384	Protein of unknown function
AGROCRI.1P.000726.1	1P.scaffold-548	5293	7234	Protein of unknown function
AGROCRI.1P.000727.1	1P.scaffold-358	524	1610	Protein of unknown function
AGROCRI.1P.000728.1	1P.scaffold-358	4918	8865	Protein of unknown function
AGROCRI.1P.000729.1	1P.scaffold-4158	882	5143	Cation-chloride cotransporter 2
AGROCRI.1P.000730.1	1P.scaffold-3923	550	3199	Protein of unknown function
AGROCRI.1P.000731.1	1P.scaffold-1141	2841	4585	Protein of unknown function
AGROCRI.1P.000732.1	1P.scaffold-1141	6361	7833	Protein of unknown function
AGROCRI.1P.000733.1	1P.scaffold-311	2007	7392	Protein of unknown function
AGROCRI.1P.000734.1	1P.scaffold-2259	961	1630	Protein of unknown function
AGROCRI.1P.000735.1	1P.scaffold-2259	8977	11422	Protein of unknown function
AGROCRI.1P.000736.1	1P.scaffold-2259	12019	14630	Protein of unknown function
AGROCRI.1P.000737.1	1P.scaffold-705	3233	13162	Protein of unknown function
AGROCRI.1P.000738.1	1P.scaffold-1050	198	3037	Protein of unknown function
AGROCRI.1P.000739.1	1P.scaffold-1050	3995	6439	Protein of unknown function
AGROCRI.1P.000740.1	1P.scaffold-233	979	6350	Protein of unknown function
AGROCRI.1P.000741.1	1P.scaffold-139	145	4214	Protein of unknown function
AGROCRI.1P.000742.1	1P.scaffold-2162	152	1552	Protein of unknown function
AGROCRI.1P.000743.1	1P.scaffold-2162	3476	4876	Protein of unknown function
AGROCRI.1P.000744.1	1P.scaffold-2162	5341	7368	BRAP2 RING ZnF UBP domain-containing protein 2
AGROCRI.1P.000745.1	1P.scaffold-516	472	2550	Protein of unknown function
AGROCRI.1P.000746.1	1P.scaffold-516	5106	6455	Protein of unknown function
AGROCRI.1P.000747.1	1P.scaffold-516	6771	8132	Protein of unknown function
AGROCRI.1P.000748.1	1P.scaffold-516	14162	15523	Protein of unknown function
AGROCRI.1P.000749.1	1P.scaffold-1039	1	1191	Protein of unknown function
AGROCRI.1P.000750.1	1P.scaffold-1039	3867	8041	Protein of unknown function
AGROCRI.1P.000751.1	1P.scaffold-1188	5220	5531	Protein of unknown function
AGROCRI.1P.000752.1	1P.scaffold-1188	9929	10429	Protein of unknown function
AGROCRI.1P.000753.1	1P.scaffold-1188	13350	13844	Protein of unknown function
AGROCRI.1P.000754.1	1P.scaffold-1188	15648	16625	Protein of unknown function
AGROCRI.1P.000755.1	1P.scaffold-1188	17001	17375	Protein of unknown function
AGROCRI.1P.000756.1	1P.scaffold-941	78	566	Protein of unknown function
AGROCRI.1P.000757.1	1P.scaffold-941	820	5192	Protein of unknown function
AGROCRI.1P.000758.1	1P.scaffold-941	6475	6768	Protein of unknown function
AGROCRI.1P.000759.1	1P.scaffold-2064	195	4750	Aspartate carbamoyltransferase
AGROCRI.1P.000760.1	1P.scaffold-1215	4193	7180	Protein of unknown function
AGROCRI.1P.000761.1	1P.scaffold-1215	11446	12015	Protein of unknown function
AGROCRI.1P.000762.1	1P.scaffold-38218	1900	5881	Protein of unknown function
AGROCRI.1P.000763.1	1P.scaffold-658	11344	13008	T-complex protein 1 subunit alpha
AGROCRI.1P.000764.1	1P.scaffold-658	14074	17896	Vacuolar calcium ion transporter
AGROCRI.1P.000765.1	1P.scaffold-658	18310	22175	Squalene monooxygenase
AGROCRI.1P.000766.1	1P.scaffold-22175	163	3314	1
AGROCRI.1P.000767.1	1P.scaffold-460	1017	3530	Protein of unknown function
AGROCRI.1P.000768.1	1P.scaffold-460	5331	5525	Protein of unknown function
AGROCRI.1P.000769.1	1P.scaffold-2009	5347	5970	Protein of unknown function
AGROCRI.1P.000770.1	1P.scaffold-2009	14768	16010	Protein of unknown function
AGROCRI.1P.000771.1	1P.scaffold-2009	16624	16995	Protein of unknown function
AGROCRI.1P.000772.1	1P.scaffold-2009	17283	18202	Protein of unknown function
AGROCRI.1P.000773.1	1P.scaffold-691	1133	4162	Protein of unknown function
AGROCRI.1P.000774.1	1P.scaffold-691	4823	5107	Protein of unknown function
AGROCRI.1P.000775.1	1P.scaffold-691	11275	12475	Protein of unknown function
AGROCRI.1P.000776.1	1P.scaffold-253	371	793	Protein of unknown function
AGROCRI.1P.000777.1	1P.scaffold-253	1091	2088	Protein of unknown function
AGROCRI.1P.000778.1	1P.scaffold-253	2764	3204	Protein of unknown function
AGROCRI.1P.000779.1	1P.scaffold-253	4851	5273	Protein of unknown function
AGROCRI.1P.000780.1	1P.scaffold-758	253	3643	Protein of unknown function
AGROCRI.1P.000781.1	1P.scaffold-758	7176	12337	NADPH-dependent diflavin oxidoreductase 1
AGROCRI.1P.000782.1	1P.scaffold-100	1481	4290	Protein of unknown function
AGROCRI.1P.000783.1	1P.scaffold-100	4954	5469	Protein of unknown function
AGROCRI.1P.000784.1	1P.scaffold-100	7555	8325	Protein of unknown function
AGROCRI.1P.000785.1	1P.scaffold-100	8389	9811	Protein of unknown function
AGROCRI.1P.000786.1	1P.scaffold-995	3618	9649	Protein of unknown function
AGROCRI.1P.000787.1	1P.scaffold-54	717	6647	Protein of unknown function
AGROCRI.1P.000788.1	1P.scaffold-54	7432	8043	Protein of unknown function
AGROCRI.1P.000789.1	1P.scaffold-1224	6715	11976	Protein of unknown function
AGROCRI.1P.000790.1	1P.scaffold-27501	69	984	Chaperonin CPN60-1
AGROCRI.1P.000791.1	1P.scaffold-27501	991	1435	Chaperonin CPN60-like 2
AGROCRI.1P.000792.1	1P.scaffold-160	173	2694	Protein of unknown function
AGROCRI.1P.000793.1	1P.scaffold-160	6403	9596	Protein of unknown function
AGROCRI.1P.000794.1	1P.scaffold-1186	3011	6126	Cellulose synthase-like protein H1
AGROCRI.1P.000795.1	1P.scaffold-520	99	1223	Protein of unknown function
AGROCRI.1P.000796.1	1P.scaffold-520	1916	8151	Protein of unknown function
AGROCRI.1P.000797.1	1P.scaffold-502	117	502	Protein of unknown function
AGROCRI.1P.000798.1	1P.scaffold-502	1132	2510	Protein of unknown function
AGROCRI.1P.000799.1	1P.scaffold-502	3108	3688	Protein of unknown function
AGROCRI.1P.000800.1	1P.scaffold-1315	683	1456	Protein of unknown function
AGROCRI.1P.000801.1	1P.scaffold-1315	4488	6394	Protein of unknown function
AGROCRI.1P.000802.1	1P.scaffold-3118	5678	10176	Protein of unknown function
AGROCRI.1P.000803.1	1P.scaffold-725	4595	6037	Zinc finger protein ZPR1
AGROCRI.1P.000804.1	1P.scaffold-725	19452	21554	Tryptophan synthase
AGROCRI.1P.000805.1	1P.scaffold-725	22730	25978	Calmodulin
AGROCRI.1P.000806.1	1P.scaffold-34202	2960	7429	Protein of unknown function
AGROCRI.1P.000807.1	1P.scaffold-34202	10830	11474	Protein of unknown function
AGROCRI.1P.000808.1	1P.scaffold-1239	1229	3358	Protein of unknown function
AGROCRI.1P.000809.1	1P.scaffold-1239	5888	7408	3-aminomethylindole N-methyltransferase
AGROCRI.1P.000810.1	1P.scaffold-2080	100	3151	Protein of unknown function
AGROCRI.1P.000811.1	1P.scaffold-5584	9051	14710	2-succinyl-5-enolpyruvyl-6-hydroxy-3-cyclohexene-1-carboxylate synthase
AGROCRI.1P.000812.1	1P.scaffold-1311	2065	3621	Protein of unknown function
AGROCRI.1P.000813.1	1P.scaffold-1311	5119	7359	Protein of unknown function
AGROCRI.1P.000814.1	1P.scaffold-37280	9999	19205	GTP-binding protein RHO1
AGROCRI.1P.000815.1	1P.scaffold-37280	20629	21702	tRNA (guanine(9)-N1)-methyltransferase
AGROCRI.1P.000816.1	1P.scaffold-2275	149	2468	Protein of unknown function
AGROCRI.1P.000817.1	1P.scaffold-524	135	2628	Protein of unknown function
AGROCRI.1P.000818.1	1P.scaffold-524	6594	9591	Protein of unknown function
AGROCRI.1P.000819.1	1P.scaffold-929	214	2849	Protein of unknown function
AGROCRI.1P.000820.1	1P.scaffold-929	4514	7013	Protein of unknown function
AGROCRI.1P.000821.1	1P.scaffold-929	10568	10867	Protein of unknown function
AGROCRI.1P.000822.1	1P.scaffold-634	10247	11470	Protein of unknown function
AGROCRI.1P.000823.1	1P.scaffold-634	11970	13145	Protein of unknown function
AGROCRI.1P.000824.1	1P.scaffold-43	45	1890	Protein of unknown function
AGROCRI.1P.000825.1	1P.scaffold-43	2406	3336	Protein of unknown function
AGROCRI.1P.000826.1	1P.scaffold-43	3565	7402	Protein of unknown function
AGROCRI.1P.000827.1	1P.scaffold-485	1233	6912	Protein of unknown function
AGROCRI.1P.000828.1	1P.scaffold-1335	527	5487	DNA mismatch repair protein MSH2
AGROCRI.1P.000829.1	1P.scaffold-844	326	604	Protein of unknown function
AGROCRI.1P.000830.1	1P.scaffold-844	2669	7330	Protein of unknown function
AGROCRI.1P.000831.1	1P.scaffold-1094	1	2161	Protein of unknown function
AGROCRI.1P.000832.1	1P.scaffold-1094	2921	7212	Protein of unknown function
AGROCRI.1P.000833.1	1P.scaffold-892	4396	8592	Protein of unknown function
AGROCRI.1P.000834.1	1P.scaffold-892	10145	10759	Protein of unknown function
AGROCRI.1P.000835.1	1P.scaffold-6466	2372	7340	D-methionine-binding lipoprotein MetQ
AGROCRI.1P.000836.1	1P.scaffold-347	2264	3262	Protein of unknown function
AGROCRI.1P.000837.1	1P.scaffold-347	3612	6177	Protein of unknown function
AGROCRI.1P.000838.1	1P.scaffold-109	1513	5831	Probable nucleolar protein 5-1
AGROCRI.1P.000839.1	1P.scaffold-1393	2	856	Protein of unknown function
AGROCRI.1P.000840.1	1P.scaffold-1393	1691	2551	Protein of unknown function
AGROCRI.1P.000841.1	1P.scaffold-1393	12714	13065	Protein of unknown function
AGROCRI.1P.000842.1	1P.scaffold-1364	5111	9728	ATP-dependent helicase NAM7
AGROCRI.1P.000843.1	1P.scaffold-1364	15777	20536	Protein of unknown function
AGROCRI.1P.000844.1	1P.scaffold-1364	21203	21586	SEC14 cytosolic factor
AGROCRI.1P.000845.1	1P.scaffold-38140	881	6810	Protein of unknown function
AGROCRI.1P.000846.1	1P.scaffold-353	562	4706	Protein of unknown function
AGROCRI.1P.000847.1	1P.scaffold-1189	2533	6627	Protein of unknown function
AGROCRI.1P.000848.1	1P.scaffold-1189	7842	8666	Protein of unknown function
AGROCRI.1P.000849.1	1P.scaffold-6836	398	4098	Protein of unknown function
AGROCRI.1P.000850.1	1P.scaffold-947	664	1542	Protein of unknown function
AGROCRI.1P.000851.1	1P.scaffold-947	2196	3502	Protein of unknown function
AGROCRI.1P.000852.1	1P.scaffold-320	2037	7121	Protein of unknown function
AGROCRI.1P.000853.1	1P.scaffold-1016	685	1613	Protein of unknown function
AGROCRI.1P.000854.1	1P.scaffold-1016	8537	8959	Protein of unknown function
AGROCRI.1P.000855.1	1P.scaffold-1016	10585	13368	Protein of unknown function
AGROCRI.1P.000856.1	1P.scaffold-1593	4722	7682	Protein of unknown function
AGROCRI.1P.000857.1	1P.scaffold-17	4170	5669	Ribosome assembly protein RRB1
AGROCRI.1P.000858.1	1P.scaffold-17	6896	10328	Protein of unknown function
AGROCRI.1P.000859.1	1P.scaffold-17	16342	21139	DNA-directed RNA polymerases I
AGROCRI.1P.000860.1	1P.scaffold-573	965	7536	Protein of unknown function
AGROCRI.1P.000861.1	1P.scaffold-1843	6230	7128	Protein of unknown function
AGROCRI.1P.000862.1	1P.scaffold-1843	8033	9656	Protein of unknown function
AGROCRI.1P.000863.1	1P.scaffold-282	2673	11493	Protein of unknown function
AGROCRI.1P.000864.1	1P.scaffold-697	737	1669	Protein of unknown function
AGROCRI.1P.000865.1	1P.scaffold-697	4449	7409	Protein of unknown function
AGROCRI.1P.000866.1	1P.scaffold-1196	893	4691	Protein of unknown function
AGROCRI.1P.000867.1	1P.scaffold-624	450	1174	Protein of unknown function
AGROCRI.1P.000868.1	1P.scaffold-624	11630	13206	Protein of unknown function
AGROCRI.1P.000869.1	1P.scaffold-624	16849	17256	Protein of unknown function
AGROCRI.1P.000870.1	1P.scaffold-709	1	2877	Calcium-dependent protein kinase 19
AGROCRI.1P.000871.1	1P.scaffold-1830	3367	7622	RNA-binding protein Y14B
AGROCRI.1P.000872.1	1P.scaffold-661	17	2761	Transcriptional repressor TUP1
AGROCRI.1P.000873.1	1P.scaffold-661	9366	11180	Arginine--tRNA ligase
AGROCRI.1P.000874.1	1P.scaffold-661	13346	14026	Superoxide dismutase [Mn]
AGROCRI.1P.000875.1	1P.scaffold-914	84	3876	Protein of unknown function
AGROCRI.1P.000876.1	1P.scaffold-4195	233	3313	Protein of unknown function
AGROCRI.1P.000877.1	1P.scaffold-4195	4813	6780	Protein of unknown function
AGROCRI.1P.000878.1	1P.scaffold-1023	1280	4551	Protein of unknown function
AGROCRI.1P.000879.1	1P.scaffold-2389	391	1858	Chaperonin CPN60-like 2
AGROCRI.1P.000880.1	1P.scaffold-318	2961	7376	Protein of unknown function
AGROCRI.1P.000881.1	1P.scaffold-1142	917	2111	Protein of unknown function
AGROCRI.1P.000882.1	1P.scaffold-1142	5677	6295	Protein of unknown function
AGROCRI.1P.000883.1	1P.scaffold-1142	7214	8704	Protein of unknown function
AGROCRI.1P.000884.1	1P.scaffold-1492	366	2396	Acetyl-coenzyme A synthetase 1
AGROCRI.1P.000885.1	1P.scaffold-1492	3755	15894	Protein of unknown function
AGROCRI.1P.000886.1	1P.scaffold-4780	636	4253	Protein of unknown function
AGROCRI.1P.000887.1	1P.scaffold-82	42	2195	Protein of unknown function
AGROCRI.1P.000888.1	1P.scaffold-82	3880	4584	Protein of unknown function
AGROCRI.1P.000889.1	1P.scaffold-82	7759	13298	Protein of unknown function
AGROCRI.1P.000890.1	1P.scaffold-1964	4608	8049	Kinesin-like protein KIN-12A
AGROCRI.1P.000891.1	1P.scaffold-11070	1425	3811	Protein of unknown function
AGROCRI.1P.000892.1	1P.scaffold-11070	4496	5499	Protein of unknown function
AGROCRI.1P.000893.1	1P.scaffold-4401	3083	5353	Protein of unknown function
AGROCRI.1P.000894.1	1P.scaffold-2177	3056	4294	Protein of unknown function
AGROCRI.1P.000895.1	1P.scaffold-2177	5466	6263	Protein of unknown function
AGROCRI.1P.000896.1	1P.scaffold-652	5562	6502	Protein of unknown function
AGROCRI.1P.000897.1	1P.scaffold-652	13953	14755	Protein of unknown function
AGROCRI.1P.000898.1	1P.scaffold-652	14792	15082	Protein of unknown function
AGROCRI.1P.000899.1	1P.scaffold-414	6044	7506	Protein of unknown function
AGROCRI.1P.000900.1	1P.scaffold-414	9621	11295	Protein of unknown function
AGROCRI.1P.000901.1	1P.scaffold-552	1427	2752	Protein of unknown function
AGROCRI.1P.000902.1	1P.scaffold-552	5271	7468	Protein of unknown function
AGROCRI.1P.000903.1	1P.scaffold-146	95	1608	Protein of unknown function
AGROCRI.1P.000904.1	1P.scaffold-146	4258	8252	Protein of unknown function
AGROCRI.1P.000905.1	1P.scaffold-1281	781	4278	Protein TIC 40
AGROCRI.1P.000906.1	1P.scaffold-1192	4613	7471	Protein of unknown function
AGROCRI.1P.000907.1	1P.scaffold-39346	2094	3338	Protein of unknown function
AGROCRI.1P.000908.1	1P.scaffold-39346	6390	7571	Protein of unknown function
AGROCRI.1P.000909.1	1P.scaffold-39346	8875	10464	D-2-hydroxyglutarate--pyruvate transhydrogenase DLD2
AGROCRI.1P.000910.1	1P.scaffold-39346	12289	15199	Protein of unknown function
AGROCRI.1P.000911.1	1P.scaffold-1169	733	3289	Protein of unknown function
AGROCRI.1P.000912.1	1P.scaffold-1169	4099	5528	Protein of unknown function
AGROCRI.1P.000913.1	1P.scaffold-41474	1032	1952	Protein of unknown function
AGROCRI.1P.000914.1	1P.scaffold-41474	3365	4404	Protein of unknown function
AGROCRI.1P.000915.1	1P.scaffold-1203	900	4511	Protein of unknown function
AGROCRI.1P.000916.1	1P.scaffold-84	5226	5630	Protein of unknown function
AGROCRI.1P.000917.1	1P.scaffold-84	10541	12344	Protein of unknown function
AGROCRI.1P.000918.1	1P.scaffold-84	12550	15207	Protein of unknown function
AGROCRI.1P.000919.1	1P.scaffold-69	1064	4878	Protein of unknown function
AGROCRI.1P.000920.1	1P.scaffold-421	437	2275	Protein of unknown function
AGROCRI.1P.000921.1	1P.scaffold-421	3576	5915	Protein of unknown function
AGROCRI.1P.000922.1	1P.scaffold-1949	3	666	Cyclin-T1-3
AGROCRI.1P.000923.1	1P.scaffold-1949	758	3862	Cyclin-T1-3
AGROCRI.1P.000924.1	1P.scaffold-8607	1642	6917	Protein of unknown function
AGROCRI.1P.000925.1	1P.scaffold-8607	6993	7412	Protein of unknown function
AGROCRI.1P.000926.1	1P.scaffold-1556	1001	5828	Protein of unknown function
AGROCRI.1P.000927.1	1P.scaffold-4345	4520	10369	tRNA-specific 2-thiouridylase MnmA
AGROCRI.1P.000928.1	1P.scaffold-1262	822	5288	Protein of unknown function
AGROCRI.1P.000929.1	1P.scaffold-1463	6015	7715	Oryzain alpha chain
AGROCRI.1P.000930.1	1P.scaffold-1463	8039	8981	Oryzain alpha chain
AGROCRI.1P.000931.1	1P.scaffold-2350	133	8289	Ferredoxin--NADP reductase
AGROCRI.1P.000932.1	1P.scaffold-872	403	4476	DNA-directed RNA polymerase subunit beta
AGROCRI.1P.000933.1	1P.scaffold-872	4625	8740	DNA-directed RNA polymerase subunit beta'
AGROCRI.1P.000934.1	1P.scaffold-872	9447	9917	30S ribosomal protein S7
AGROCRI.1P.000935.1	1P.scaffold-872	9948	13277	Elongation factor G
AGROCRI.1P.000936.1	1P.scaffold-432	67	6074	Protein of unknown function
AGROCRI.1P.000937.1	1P.scaffold-9441	28896	29915	Protein of unknown function
AGROCRI.1P.000938.1	1P.scaffold-9441	31138	36032	Protein of unknown function
AGROCRI.1P.000939.1	1P.scaffold-279	988	1548	Protein of unknown function
AGROCRI.1P.000940.1	1P.scaffold-279	2165	3797	Protein of unknown function
AGROCRI.1P.000941.1	1P.scaffold-279	5442	6393	Protein of unknown function
AGROCRI.1P.000942.1	1P.scaffold-10291	48	2482	Pre-mRNA-processing-splicing factor 8A
AGROCRI.1P.000943.1	1P.scaffold-458	180	3050	Protein of unknown function
AGROCRI.1P.000944.1	1P.scaffold-458	3434	3757	Protein of unknown function
AGROCRI.1P.000945.1	1P.scaffold-1518	1280	4197	Protein of unknown function
AGROCRI.1P.000946.1	1P.scaffold-321	66	1954	Protein of unknown function
AGROCRI.1P.000947.1	1P.scaffold-321	3031	4318	Protein of unknown function
AGROCRI.1P.000948.1	1P.scaffold-1440	8281	10017	Protein of unknown function
AGROCRI.1P.000949.1	1P.scaffold-1440	15673	17129	Protein of unknown function
AGROCRI.1P.000950.1	1P.scaffold-1254	840	3845	Protein of unknown function
AGROCRI.1P.000951.1	1P.scaffold-1254	6362	6871	Protein of unknown function
AGROCRI.1P.000952.1	1P.scaffold-3822	1	1614	Putative cysteine-rich receptor-like protein kinase 35
AGROCRI.1P.000953.1	1P.scaffold-1173	9393	13352	Protein of unknown function
AGROCRI.1P.000954.1	1P.scaffold-1173	13994	15230	Protein of unknown function
AGROCRI.1P.000955.1	1P.scaffold-236	745	1426	Protein of unknown function
AGROCRI.1P.000956.1	1P.scaffold-236	5253	6800	60S ribosomal protein L36a
AGROCRI.1P.000957.1	1P.scaffold-3479	200	3419	Protein of unknown function
AGROCRI.1P.000958.1	1P.scaffold-893	1940	5583	Protein of unknown function
AGROCRI.1P.000959.1	1P.scaffold-8048	1559	2566	Protein of unknown function
AGROCRI.1P.000960.1	1P.scaffold-8048	5464	5874	Histone H3.1/H3.2
AGROCRI.1P.000961.1	1P.scaffold-8048	6443	6754	Histone H4
AGROCRI.1P.000962.1	1P.scaffold-8048	7590	7886	Histone H4
AGROCRI.1P.000963.1	1P.scaffold-8039	197	886	Gamma-glutamylcyclotransferase 2-3
AGROCRI.1P.000964.1	1P.scaffold-8039	1446	2879	Aspartyl protease 37
AGROCRI.1P.000965.1	1P.scaffold-1297	6077	9106	COMPASS-like H3K4 histone methylase component WDR5B
AGROCRI.1P.000966.1	1P.scaffold-1297	10607	11946	Protein of unknown function
AGROCRI.1P.000967.1	1P.scaffold-1175	1180	7153	Pseudo histidine-containing phosphotransfer protein 1
AGROCRI.1P.000968.1	1P.scaffold-5336	194	2391	Protein of unknown function
AGROCRI.1P.000969.1	1P.scaffold-1225	295	2480	Protein of unknown function
AGROCRI.1P.000970.1	1P.scaffold-1225	5966	7423	Protein of unknown function
AGROCRI.1P.000971.1	1P.scaffold-1225	7385	8836	Protein of unknown function
AGROCRI.1P.000972.1	1P.scaffold-92	9374	10080	Protein of unknown function
AGROCRI.1P.000973.1	1P.scaffold-92	10267	10587	Protein of unknown function
AGROCRI.1P.000974.1	1P.scaffold-338	967	2828	Protein of unknown function
AGROCRI.1P.000975.1	1P.scaffold-338	3864	5870	Protein of unknown function
AGROCRI.1P.000976.1	1P.scaffold-372	2034	6952	Protein of unknown function
AGROCRI.1P.000977.1	1P.scaffold-372	9344	12258	Protein of unknown function
AGROCRI.1P.000978.1	1P.scaffold-1850	4628	5594	Proteasome subunit alpha type-1
AGROCRI.1P.000979.1	1P.scaffold-1850	6538	7893	Probable histone deacetylase HOS2
AGROCRI.1P.000980.1	1P.scaffold-1850	8679	10424	Protein of unknown function
AGROCRI.1P.000981.1	1P.scaffold-4251	4323	5067	Protein of unknown function
AGROCRI.1P.000982.1	1P.scaffold-4251	6368	8317	Protein of unknown function
AGROCRI.1P.000983.1	1P.scaffold-98	1264	2745	Protein of unknown function
AGROCRI.1P.000984.1	1P.scaffold-98	3391	3992	Protein of unknown function
AGROCRI.1P.000985.1	1P.scaffold-98	10591	11691	Protein of unknown function
AGROCRI.1P.000986.1	1P.scaffold-1816	178	1480	Protein of unknown function
AGROCRI.1P.000987.1	1P.scaffold-1816	2046	4268	Protein of unknown function
AGROCRI.1P.000988.1	1P.scaffold-556	1178	2212	Protein of unknown function
AGROCRI.1P.000989.1	1P.scaffold-556	7378	8667	Protein of unknown function
AGROCRI.1P.000990.1	1P.scaffold-1888	27	701	CBS domain-containing protein CBSCBSPB3
AGROCRI.1P.000991.1	1P.scaffold-1888	6449	6949	Protein of unknown function
AGROCRI.1P.000992.1	1P.scaffold-2054	809	1111	Protein of unknown function
AGROCRI.1P.000993.1	1P.scaffold-2054	1246	3310	Protein of unknown function
AGROCRI.1P.000994.1	1P.scaffold-733	9300	11060	Protein of unknown function
AGROCRI.1P.000995.1	1P.scaffold-733	12015	12787	Protein of unknown function
AGROCRI.1P.000996.1	1P.scaffold-1673	246	1676	Protein of unknown function
AGROCRI.1P.000997.1	1P.scaffold-1673	2972	3902	Eukaryotic translation initiation factor eIF-1
AGROCRI.1P.000998.1	1P.scaffold-12808	3344	6617	Protein of unknown function
AGROCRI.1P.000999.1	1P.scaffold-1034	4312	4824	Protein of unknown function
AGROCRI.1P.001000.1	1P.scaffold-1034	10301	12035	MAP3K epsilon protein kinase 1
AGROCRI.1P.001001.1	1P.scaffold-809	4812	7458	E3 ubiquitin-protein ligase XB3
AGROCRI.1P.001002.1	1P.scaffold-5772	1057	8194	Protein of unknown function
AGROCRI.1P.001003.1	1P.scaffold-5772	8839	10188	Protein of unknown function
AGROCRI.1P.001004.1	1P.scaffold-653	5292	7069	Protein of unknown function
AGROCRI.1P.001005.1	1P.scaffold-653	13508	14574	Protein of unknown function
AGROCRI.1P.001006.1	1P.scaffold-136	4654	8960	Protein of unknown function
AGROCRI.1P.001007.1	1P.scaffold-136	9718	10617	Protein transport protein SEC13
AGROCRI.1P.001008.1	1P.scaffold-136	20177	20530	V-type proton ATPase subunit F
AGROCRI.1P.001009.1	1P.scaffold-1093	1745	8917	Protein of unknown function
AGROCRI.1P.001010.1	1P.scaffold-481	330	731	Protein of unknown function
AGROCRI.1P.001011.1	1P.scaffold-481	1507	5642	Protein of unknown function
AGROCRI.1P.001012.1	1P.scaffold-8313	97	2939	Protein of unknown function
AGROCRI.1P.001013.1	1P.scaffold-607	545	1380	Protein of unknown function
AGROCRI.1P.001014.1	1P.scaffold-607	4391	4783	Protein of unknown function
AGROCRI.1P.001015.1	1P.scaffold-607	5926	8081	Protein of unknown function
AGROCRI.1P.001016.1	1P.scaffold-171	952	2475	Protein of unknown function
AGROCRI.1P.001017.1	1P.scaffold-171	3895	5352	Protein of unknown function
AGROCRI.1P.001018.1	1P.scaffold-791	1740	2009	Protein of unknown function
AGROCRI.1P.001019.1	1P.scaffold-791	3194	3535	Protein of unknown function
AGROCRI.1P.001020.1	1P.scaffold-791	6738	7157	Protein of unknown function
AGROCRI.1P.001021.1	1P.scaffold-791	12471	12677	Protein of unknown function
AGROCRI.1P.001022.1	1P.scaffold-13091	3525	5095	Protein of unknown function
AGROCRI.1P.001023.1	1P.scaffold-13091	5214	5813	Protein of unknown function
AGROCRI.1P.001024.1	1P.scaffold-1540	2808	6605	Protein of unknown function
AGROCRI.1P.001025.1	1P.scaffold-289	5312	6112	Protein of unknown function
AGROCRI.1P.001026.1	1P.scaffold-289	6576	10901	Protein of unknown function
AGROCRI.1P.001027.1	1P.scaffold-289	16165	16965	Protein of unknown function
AGROCRI.1P.001028.1	1P.scaffold-289	17429	20983	Protein of unknown function
AGROCRI.1P.001029.1	1P.scaffold-1139	21	2417	Tryptophan--tRNA ligase
AGROCRI.1P.001030.1	1P.scaffold-1139	3105	4388	Tryptophan--tRNA ligase
AGROCRI.1P.001031.1	1P.scaffold-1139	6031	6660	3
AGROCRI.1P.001032.1	1P.scaffold-672	2	2047	Transaldolase
AGROCRI.1P.001033.1	1P.scaffold-672	15396	17912	DNA replication licensing factor MCM2
AGROCRI.1P.001034.1	1P.scaffold-672	22715	24352	DNA replication licensing factor MCM2
AGROCRI.1P.001035.1	1P.scaffold-36478	3570	5632	Callose synthase 2
AGROCRI.1P.001036.1	1P.scaffold-36478	16126	17530	Protein of unknown function
AGROCRI.1P.001037.1	1P.scaffold-86	3855	9654	Protein of unknown function
AGROCRI.1P.001038.1	1P.scaffold-1258	1427	2057	Protein of unknown function
AGROCRI.1P.001039.1	1P.scaffold-1258	4504	6568	Protein of unknown function
AGROCRI.1P.001040.1	1P.scaffold-3229	302	2444	CSC1-like protein At3g21620
AGROCRI.1P.001041.1	1P.scaffold-3730	2859	4046	Protein of unknown function
AGROCRI.1P.001042.1	1P.scaffold-12700	3655	5463	Protein of unknown function
AGROCRI.1P.001043.1	1P.scaffold-11603	1386	2411	Protein of unknown function
AGROCRI.1P.001044.1	1P.scaffold-11603	6198	7223	Protein of unknown function
AGROCRI.1P.001045.1	1P.scaffold-1162	1967	8581	Protein of unknown function
AGROCRI.1P.001046.1	1P.scaffold-1162	9742	10720	Protein of unknown function
AGROCRI.1P.001047.1	1P.scaffold-4181	3	392	Protein of unknown function
AGROCRI.1P.001048.1	1P.scaffold-4181	1181	2790	Sm-like protein LSM8
AGROCRI.1P.001049.1	1P.scaffold-4181	3390	4112	Protein of unknown function
AGROCRI.1P.001050.1	1P.scaffold-11339	11946	15362	Protein of unknown function
AGROCRI.1P.001051.1	1P.scaffold-11339	16478	16945	H/ACA ribonucleoprotein complex subunit NHP2
AGROCRI.1P.001052.1	1P.scaffold-11339	19064	22168	Lon protease homolog
AGROCRI.1P.001053.1	1P.scaffold-6820	728	3570	187-kDa microtubule-associated protein AIR9
AGROCRI.1P.001054.1	1P.scaffold-3439	98	3619	Protein of unknown function
AGROCRI.1P.001055.1	1P.scaffold-33356	1236	4188	Succinate--CoA ligase [ADP-forming] subunit beta
AGROCRI.1P.001056.1	1P.scaffold-33356	7889	10676	C-1-tetrahydrofolate synthase
AGROCRI.1P.001057.1	1P.scaffold-17582	1085	3667	Protoheme IX farnesyltransferase
AGROCRI.1P.001058.1	1P.scaffold-17582	9190	10545	Probable histone deacetylase HOS2
AGROCRI.1P.001059.1	1P.scaffold-17582	11331	13076	Protein of unknown function
AGROCRI.1P.001060.1	1P.scaffold-790	163	8622	DNA polymerase epsilon catalytic subunit A
AGROCRI.1P.001061.1	1P.scaffold-790	10260	11687	Alpha
AGROCRI.1P.001062.1	1P.scaffold-37972	55	2200	50S ribosomal protein L5
AGROCRI.1P.001063.1	1P.scaffold-7201	1358	3490	Protein of unknown function
AGROCRI.1P.001064.1	1P.scaffold-903	11468	12277	Methylthioribulose-1-phosphate dehydratase
AGROCRI.1P.001065.1	1P.scaffold-903	13145	13747	Protein of unknown function
AGROCRI.1P.001066.1	1P.scaffold-903	14154	18656	Protein of unknown function
AGROCRI.1P.001067.1	1P.scaffold-903	20939	21394	Nucleoside diphosphate kinase
AGROCRI.1P.001068.1	1P.scaffold-235	330	1544	Protein of unknown function
AGROCRI.1P.001069.1	1P.scaffold-235	1986	4825	Protein of unknown function
AGROCRI.1P.001070.1	1P.scaffold-8687	122	2444	Protein of unknown function
AGROCRI.1P.001071.1	1P.scaffold-345	355	3924	Protein of unknown function
AGROCRI.1P.001072.1	1P.scaffold-345	7595	9330	Protein of unknown function
AGROCRI.1P.001073.1	1P.scaffold-1232	235	2862	Protein of unknown function
AGROCRI.1P.001074.1	1P.scaffold-1232	4812	5922	Protein of unknown function
AGROCRI.1P.001075.1	1P.scaffold-131	754	1326	Protein of unknown function
AGROCRI.1P.001076.1	1P.scaffold-131	2632	3432	Protein of unknown function
AGROCRI.1P.001077.1	1P.scaffold-131	4457	6024	Protein of unknown function
AGROCRI.1P.001078.1	1P.scaffold-37461	3029	3786	Protein of unknown function
AGROCRI.1P.001079.1	1P.scaffold-37461	7052	7699	Protein of unknown function
AGROCRI.1P.001080.1	1P.scaffold-582	137	1549	Protein of unknown function
AGROCRI.1P.001081.1	1P.scaffold-582	1893	2195	Protein of unknown function
AGROCRI.1P.001082.1	1P.scaffold-582	2933	3235	Protein of unknown function
AGROCRI.1P.001083.1	1P.scaffold-25103	109	657	Protein of unknown function
AGROCRI.1P.001084.1	1P.scaffold-25103	2806	3420	Protein of unknown function
AGROCRI.1P.001085.1	1P.scaffold-7463	532	5018	Protein of unknown function
AGROCRI.1P.001086.1	1P.scaffold-860	2347	3234	Protein of unknown function
AGROCRI.1P.001087.1	1P.scaffold-860	8674	11769	Protein of unknown function
AGROCRI.1P.001088.1	1P.scaffold-4650	1013	2739	Uncharacterized protein At2g33490
AGROCRI.1P.001089.1	1P.scaffold-1865	567	2233	Protein of unknown function
AGROCRI.1P.001090.1	1P.scaffold-1865	4719	5718	Protein of unknown function
AGROCRI.1P.001091.1	1P.scaffold-3726	2056	6198	Protein of unknown function
AGROCRI.1P.001092.1	1P.scaffold-3726	17503	17844	Protein of unknown function
AGROCRI.1P.001093.1	1P.scaffold-770	3191	7872	Dihydroxy-acid dehydratase
AGROCRI.1P.001094.1	1P.scaffold-770	7986	9422	L-threonine dehydratase biosynthetic IlvA
AGROCRI.1P.001095.1	1P.scaffold-30036	4829	5089	Protein of unknown function
AGROCRI.1P.001096.1	1P.scaffold-30036	8743	11042	Protein of unknown function
AGROCRI.1P.001097.1	1P.scaffold-1497	269	3908	Protein of unknown function
AGROCRI.1P.001098.1	1P.scaffold-976	3608	6965	Protein of unknown function
AGROCRI.1P.001099.1	1P.scaffold-35748	6962	7398	Protein of unknown function
AGROCRI.1P.001100.1	1P.scaffold-35748	9413	11135	Protein of unknown function
AGROCRI.1P.001101.1	1P.scaffold-427	3960	5185	Protein of unknown function
AGROCRI.1P.001102.1	1P.scaffold-427	4036	4326	Protein of unknown function
AGROCRI.1P.001103.1	1P.scaffold-427	7909	8949	Protein of unknown function
AGROCRI.1P.001104.1	1P.scaffold-744	6522	7802	RuvB-like helicase 2
AGROCRI.1P.001105.1	1P.scaffold-744	8547	10811	Protein of unknown function
AGROCRI.1P.001106.1	1P.scaffold-744	11091	14713	RuvB-like helicase 2
AGROCRI.1P.001107.1	1P.scaffold-972	4085	9580	Protein of unknown function
AGROCRI.1P.001108.1	1P.scaffold-11716	656	2994	Protein of unknown function
AGROCRI.1P.001109.1	1P.scaffold-4342	1033	5127	Protein of unknown function
AGROCRI.1P.001110.1	1P.scaffold-2569	602	1900	Protein of unknown function
AGROCRI.1P.001111.1	1P.scaffold-36923	2664	3449	40S ribosomal protein S0
AGROCRI.1P.001112.1	1P.scaffold-36923	11205	12131	GTP-binding RHO-like protein
AGROCRI.1P.001113.1	1P.scaffold-36923	27690	28883	ATP-dependent RNA helicase eIF4A
AGROCRI.1P.001114.1	1P.scaffold-36923	34360	35880	Protein of unknown function
AGROCRI.1P.001115.1	1P.scaffold-1891	1312	5261	Protein of unknown function
AGROCRI.1P.001116.1	1P.scaffold-3577	864	2842	Gamma-tubulin complex component 2
AGROCRI.1P.001117.1	1P.scaffold-1805	458	3359	Protein of unknown function
AGROCRI.1P.001118.1	1P.scaffold-1805	4398	8963	Protein of unknown function
AGROCRI.1P.001119.1	1P.scaffold-1021	2197	4589	Protein of unknown function
AGROCRI.1P.001120.1	1P.scaffold-1021	6383	6856	Protein of unknown function
AGROCRI.1P.001121.1	1P.scaffold-4362	624	4210	Protein of unknown function
AGROCRI.1P.001122.1	1P.scaffold-4000	76	3726	E3 SUMO-protein ligase SIZ1
AGROCRI.1P.001123.1	1P.scaffold-3627	109	5599	Uridylate kinase
AGROCRI.1P.001124.1	1P.scaffold-3627	6823	9402	Aminopeptidase 2
AGROCRI.1P.001125.1	1P.scaffold-2688	19	2881	Protein of unknown function
AGROCRI.1P.001126.1	1P.scaffold-824	3339	4487	Aldehyde reductase YahK
AGROCRI.1P.001127.1	1P.scaffold-824	6161	7396	Aromatic-amino-acid aminotransferase
AGROCRI.1P.001128.1	1P.scaffold-824	11638	12627	Quinone oxidoreductase 1
AGROCRI.1P.001129.1	1P.scaffold-824	13317	14336	tRNA-dihydrouridine(20/20a) synthase
AGROCRI.1P.001130.1	1P.scaffold-993	3946	8243	Protein of unknown function
AGROCRI.1P.001131.1	1P.scaffold-671	9954	12142	V-type proton ATPase catalytic subunit A
AGROCRI.1P.001132.1	1P.scaffold-671	13952	16738	Serine/threonine-protein phosphatase PP2A-1 catalytic subunit
AGROCRI.1P.001133.1	1P.scaffold-836	1071	7102	Protein of unknown function
AGROCRI.1P.001134.1	1P.scaffold-395	928	2099	Protein of unknown function
AGROCRI.1P.001135.1	1P.scaffold-395	8753	9766	Protein of unknown function
AGROCRI.1P.001136.1	1P.scaffold-395	10568	11933	Protein of unknown function
AGROCRI.1P.001137.1	1P.scaffold-22	914	3425	Protein of unknown function
AGROCRI.1P.001138.1	1P.scaffold-258	1018	5674	Protein of unknown function
AGROCRI.1P.001139.1	1P.scaffold-566	972	4882	Protein of unknown function
AGROCRI.1P.001140.1	1P.scaffold-484	44	3702	Protein of unknown function
AGROCRI.1P.001141.1	1P.scaffold-889	1072	4446	Protein of unknown function
AGROCRI.1P.001142.1	1P.scaffold-157	146	1296	Protein of unknown function
AGROCRI.1P.001143.1	1P.scaffold-157	4371	5211	Protein of unknown function
AGROCRI.1P.001144.1	1P.scaffold-316	430	1856	Protein of unknown function
AGROCRI.1P.001145.1	1P.scaffold-316	3995	5651	Protein of unknown function
AGROCRI.1P.001146.1	1P.scaffold-429	3685	7683	Protein of unknown function
AGROCRI.1P.001147.1	1P.scaffold-3864	2801	4799	Protein of unknown function
AGROCRI.1P.001148.1	1P.scaffold-721	9173	14203	Protein of unknown function
AGROCRI.1P.001149.1	1P.scaffold-491	1691	6035	Protein of unknown function
AGROCRI.1P.001150.1	1P.scaffold-512	3305	4027	Protein of unknown function
AGROCRI.1P.001151.1	1P.scaffold-512	6344	11351	Protein of unknown function
AGROCRI.1P.001152.1	1P.scaffold-36237	2023	3081	Protein of unknown function
AGROCRI.1P.001153.1	1P.scaffold-36237	3346	4706	Protein of unknown function
AGROCRI.1P.001154.1	1P.scaffold-1999	956	5749	Protein of unknown function
AGROCRI.1P.001155.1	1P.scaffold-1502	5428	5769	Protein of unknown function
AGROCRI.1P.001156.1	1P.scaffold-1502	6331	7349	Protein of unknown function
AGROCRI.1P.001157.1	1P.scaffold-8	5181	9602	Protein of unknown function
AGROCRI.1P.001158.1	1P.scaffold-434	1290	5544	Protein of unknown function
AGROCRI.1P.001159.1	1P.scaffold-575	266	6106	Protein of unknown function
AGROCRI.1P.001160.1	1P.scaffold-1185	2347	3339	Protein of unknown function
AGROCRI.1P.001161.1	1P.scaffold-1185	3761	4354	Protein of unknown function
AGROCRI.1P.001162.1	1P.scaffold-1185	6566	7015	Protein of unknown function
AGROCRI.1P.001163.1	1P.scaffold-6591	847	1734	Protein of unknown function
AGROCRI.1P.001164.1	1P.scaffold-6591	1898	1906	Protein of unknown function
AGROCRI.1P.001165.1	1P.scaffold-15449	2397	3116	Protein of unknown function
AGROCRI.1P.001166.1	1P.scaffold-15449	6819	8531	Protein of unknown function
AGROCRI.1P.001167.1	1P.scaffold-4179	3	1902	O-fucosyltransferase 38
AGROCRI.1P.001168.1	1P.scaffold-1603	425	823	Protein of unknown function
AGROCRI.1P.001169.1	1P.scaffold-1603	3636	5517	Protein of unknown function
AGROCRI.1P.001170.1	1P.scaffold-969	22022	22828	Protein of unknown function
AGROCRI.1P.001171.1	1P.scaffold-969	25136	27744	Cysteine synthase
AGROCRI.1P.001172.1	1P.scaffold-4183	7640	8482	Protein of unknown function
AGROCRI.1P.001173.1	1P.scaffold-4183	9426	14186	Protein of unknown function
AGROCRI.1P.001174.1	1P.scaffold-3283	1892	4852	Protein of unknown function
AGROCRI.1P.001175.1	1P.scaffold-1367	11864	14425	Protein of unknown function
AGROCRI.1P.001176.1	1P.scaffold-738	160	1761	Protein of unknown function
AGROCRI.1P.001177.1	1P.scaffold-738	8240	11569	Protein of unknown function
AGROCRI.1P.001178.1	1P.scaffold-738	17540	20059	General transcription and DNA repair factor IIH helicase subunit XPB
AGROCRI.1P.001179.1	1P.scaffold-1049	822	2785	Sialyltransferase-like protein 5
AGROCRI.1P.001180.1	1P.scaffold-215	3809	4696	Protein of unknown function
AGROCRI.1P.001181.1	1P.scaffold-215	6909	10241	Protein of unknown function
AGROCRI.1P.001182.1	1P.scaffold-9526	1285	4942	ABC transporter B family member 19
AGROCRI.1P.001183.1	1P.scaffold-16363	6937	9549	Protein of unknown function
AGROCRI.1P.001184.1	1P.scaffold-3075	3643	4035	Protein of unknown function
AGROCRI.1P.001185.1	1P.scaffold-3075	4857	6039	Protein of unknown function
AGROCRI.1P.001186.1	1P.scaffold-964	825	2975	Protein of unknown function
AGROCRI.1P.001187.1	1P.scaffold-594	22	5586	Protein of unknown function
AGROCRI.1P.001188.1	1P.scaffold-163	610	4614	Protein of unknown function
AGROCRI.1P.001189.1	1P.scaffold-2606	1311	2483	Protein of unknown function
AGROCRI.1P.001190.1	1P.scaffold-1572	1254	4479	Protein of unknown function
AGROCRI.1P.001191.1	1P.scaffold-1572	4792	5977	Protein of unknown function
AGROCRI.1P.001192.1	1P.scaffold-1691	2570	7030	60S ribosomal protein L21-B
AGROCRI.1P.001193.1	1P.scaffold-375	816	7056	Protein of unknown function
AGROCRI.1P.001194.1	1P.scaffold-375	11891	12619	Protein of unknown function
AGROCRI.1P.001195.1	1P.scaffold-468	32	784	Protein of unknown function
AGROCRI.1P.001196.1	1P.scaffold-468	2434	5949	Protein of unknown function
AGROCRI.1P.001197.1	1P.scaffold-9243	37	1523	Protein of unknown function
AGROCRI.1P.001198.1	1P.scaffold-9243	1691	2233	Protein of unknown function
AGROCRI.1P.001199.1	1P.scaffold-20775	5824	7144	Protein of unknown function
AGROCRI.1P.001200.1	1P.scaffold-303	1615	2223	Protein of unknown function
AGROCRI.1P.001201.1	1P.scaffold-303	5996	7521	Protein of unknown function
AGROCRI.1P.001202.1	1P.scaffold-511	9	2030	Protein of unknown function
AGROCRI.1P.001203.1	1P.scaffold-511	7938	8755	Protein of unknown function
AGROCRI.1P.001204.1	1P.scaffold-439	9960	12971	Protein of unknown function
AGROCRI.1P.001205.1	1P.scaffold-800	1102	2241	L-lactate dehydrogenase
AGROCRI.1P.001206.1	1P.scaffold-800	6449	8218	Protein of unknown function
AGROCRI.1P.001207.1	1P.scaffold-800	9163	10396	Curved DNA-binding protein
AGROCRI.1P.001208.1	1P.scaffold-7283	2385	4892	Protein of unknown function
AGROCRI.1P.001209.1	1P.scaffold-12395	6737	9199	Protein of unknown function
AGROCRI.1P.001210.1	1P.scaffold-1283	504	809	Protein of unknown function
AGROCRI.1P.001211.1	1P.scaffold-1283	923	1678	Protein of unknown function
AGROCRI.1P.001212.1	1P.scaffold-1283	5306	5746	Protein of unknown function
AGROCRI.1P.001213.1	1P.scaffold-2158	21	3807	Protein of unknown function
AGROCRI.1P.001214.1	1P.scaffold-1167	530	2790	Protein of unknown function
AGROCRI.1P.001215.1	1P.scaffold-1167	4812	6772	Protein of unknown function
AGROCRI.1P.001216.1	1P.scaffold-2506	523	840	Protein of unknown function
AGROCRI.1P.001217.1	1P.scaffold-2506	1520	2235	Protein of unknown function
AGROCRI.1P.001218.1	1P.scaffold-2506	2290	2529	Protein of unknown function
AGROCRI.1P.001219.1	1P.scaffold-8481	2	2402	Protein of unknown function
AGROCRI.1P.001220.1	1P.scaffold-12011	3168	4259	Enoyl-[acyl-carrier-protein] reductase 1
AGROCRI.1P.001221.1	1P.scaffold-12011	6035	9776	Protein of unknown function
AGROCRI.1P.001222.1	1P.scaffold-12011	10104	11312	Pre-mRNA-splicing ATP-dependent RNA helicase PRP28
AGROCRI.1P.001223.1	1P.scaffold-474	3168	4191	Protein of unknown function
AGROCRI.1P.001224.1	1P.scaffold-474	6245	6481	Protein of unknown function
AGROCRI.1P.001225.1	1P.scaffold-3842	4144	6979	Protein of unknown function
AGROCRI.1P.001226.1	1P.scaffold-2227	697	1116	Protein of unknown function
AGROCRI.1P.001227.1	1P.scaffold-2227	801	3768	Protein of unknown function
AGROCRI.1P.001228.1	1P.scaffold-5605	160	2284	Protein of unknown function
AGROCRI.1P.001229.1	1P.scaffold-662	22898	23827	Protein of unknown function
AGROCRI.1P.001230.1	1P.scaffold-662	30507	31982	Glutarate-semialdehyde dehydrogenase
AGROCRI.1P.001231.1	1P.scaffold-662	36078	37684	Protein of unknown function
AGROCRI.1P.001232.1	1P.scaffold-1179	6222	9645	Protein of unknown function
AGROCRI.1P.001233.1	1P.scaffold-1933	817	2748	SH3 domain-containing protein 2
AGROCRI.1P.001234.1	1P.scaffold-1837	479	2911	CSC1-like protein At4g02900
AGROCRI.1P.001235.1	1P.scaffold-2472	4031	7201	Protein of unknown function
AGROCRI.1P.001236.1	1P.scaffold-2472	7874	9493	Myosin regulatory light chain cdc4
AGROCRI.1P.001237.1	1P.scaffold-8798	12032	12863	Protein of unknown function
AGROCRI.1P.001238.1	1P.scaffold-8798	13061	13568	Protein of unknown function
AGROCRI.1P.001239.1	1P.scaffold-41135	249	4507	Protein of unknown function
AGROCRI.1P.001240.1	1P.scaffold-424	2907	6048	Protein of unknown function
AGROCRI.1P.001241.1	1P.scaffold-424	6436	6638	Protein of unknown function
AGROCRI.1P.001242.1	1P.scaffold-1493	2999	4534	Protein of unknown function
AGROCRI.1P.001243.1	1P.scaffold-47	2441	4208	Protein of unknown function
AGROCRI.1P.001244.1	1P.scaffold-47	6809	7177	Protein of unknown function
AGROCRI.1P.001245.1	1P.scaffold-1222	289	3092	Protein of unknown function
AGROCRI.1P.001246.1	1P.scaffold-49	1152	1397	Protein of unknown function
AGROCRI.1P.001247.1	1P.scaffold-49	1586	2514	Protein of unknown function
AGROCRI.1P.001248.1	1P.scaffold-49	2758	3627	Protein of unknown function
AGROCRI.1P.001249.1	1P.scaffold-2667	3520	4680	Protein of unknown function
AGROCRI.1P.001250.1	1P.scaffold-2667	4964	5646	Protein of unknown function
AGROCRI.1P.001251.1	1P.scaffold-1635	8170	14674	GDP-mannose 4
AGROCRI.1P.001252.1	1P.scaffold-723	4257	7389	Protein of unknown function
AGROCRI.1P.001253.1	1P.scaffold-760	8601	13796	DNA topoisomerase 2
AGROCRI.1P.001254.1	1P.scaffold-760	14007	14849	Protein of unknown function
AGROCRI.1P.001255.1	1P.scaffold-760	17220	18917	Pyruvate decarboxylase
AGROCRI.1P.001256.1	1P.scaffold-6418	5814	7291	Protein of unknown function
AGROCRI.1P.001257.1	1P.scaffold-4199	2362	3486	Anamorsin homolog 2
AGROCRI.1P.001258.1	1P.scaffold-911	3370	4164	Protein of unknown function
AGROCRI.1P.001259.1	1P.scaffold-911	11013	15045	Glycine betaine-binding periplasmic protein OusX
AGROCRI.1P.001260.1	1P.scaffold-298	2235	2579	Protein of unknown function
AGROCRI.1P.001261.1	1P.scaffold-298	4672	6124	Protein of unknown function
AGROCRI.1P.001262.1	1P.scaffold-5166	1342	3293	Protein of unknown function
AGROCRI.1P.001263.1	1P.scaffold-589	1352	3244	Protein of unknown function
AGROCRI.1P.001264.1	1P.scaffold-589	3683	4072	Protein of unknown function
AGROCRI.1P.001265.1	1P.scaffold-269	3	188	Protein of unknown function
AGROCRI.1P.001266.1	1P.scaffold-269	1071	4092	Protein of unknown function
AGROCRI.1P.001267.1	1P.scaffold-2943	910	1861	Protein of unknown function
AGROCRI.1P.001268.1	1P.scaffold-2943	2306	3359	Protein of unknown function
AGROCRI.1P.001269.1	1P.scaffold-1253	154	3351	Protein of unknown function
AGROCRI.1P.001270.1	1P.scaffold-1357	2748	4232	Protein of unknown function
AGROCRI.1P.001271.1	1P.scaffold-546	1074	2037	Protein of unknown function
AGROCRI.1P.001272.1	1P.scaffold-546	5558	6380	Protein of unknown function
AGROCRI.1P.001273.1	1P.scaffold-187	31	3758	Protein of unknown function
AGROCRI.1P.001274.1	1P.scaffold-1632	388	1208	Protein of unknown function
AGROCRI.1P.001275.1	1P.scaffold-1632	2098	2660	Serine carboxypeptidase 2
AGROCRI.1P.001276.1	1P.scaffold-729	27172	32804	Protein of unknown function
AGROCRI.1P.001277.1	1P.scaffold-462	6052	12261	Protein of unknown function
AGROCRI.1P.001278.1	1P.scaffold-1135	510	4350	Protein of unknown function
AGROCRI.1P.001279.1	1P.scaffold-1260	2387	3786	Protein of unknown function
AGROCRI.1P.001280.1	1P.scaffold-2922	572	2889	Protein of unknown function
AGROCRI.1P.001281.1	1P.scaffold-2922	5837	6184	Protein of unknown function
AGROCRI.1P.001282.1	1P.scaffold-518	151	2376	Protein of unknown function
AGROCRI.1P.001283.1	1P.scaffold-518	3144	3491	Protein of unknown function
AGROCRI.1P.001284.1	1P.scaffold-922	273	638	Protein of unknown function
AGROCRI.1P.001285.1	1P.scaffold-922	1752	2300	Protein of unknown function
AGROCRI.1P.001286.1	1P.scaffold-5024	4865	6562	Protein of unknown function
AGROCRI.1P.001287.1	1P.scaffold-5024	6668	7072	Protein of unknown function
AGROCRI.1P.001288.1	1P.scaffold-1056	3	4292	Enolase
AGROCRI.1P.001289.1	1P.scaffold-789	3168	6357	Protein of unknown function
AGROCRI.1P.001290.1	1P.scaffold-685	1201	3618	Protein SEY1
AGROCRI.1P.001291.1	1P.scaffold-685	4008	5003	Protein of unknown function
AGROCRI.1P.001292.1	1P.scaffold-685	9173	10240	Histone acetyltransferase type B subunit 2
AGROCRI.1P.001293.1	1P.scaffold-149	657	1118	Protein of unknown function
AGROCRI.1P.001294.1	1P.scaffold-149	1769	4170	Protein of unknown function
AGROCRI.1P.001295.1	1P.scaffold-7359	478	3287	Protein of unknown function
AGROCRI.1P.001296.1	1P.scaffold-7444	274	2573	Protein of unknown function
AGROCRI.1P.001297.1	1P.scaffold-270	352	2534	Protein of unknown function
AGROCRI.1P.001298.1	1P.scaffold-373	2342	4880	Protein of unknown function
AGROCRI.1P.001299.1	1P.scaffold-632	109	5046	Protein of unknown function
AGROCRI.1P.001300.1	1P.scaffold-420	2731	3207	Protein of unknown function
AGROCRI.1P.001301.1	1P.scaffold-420	3850	6862	Protein of unknown function
AGROCRI.1P.001302.1	1P.scaffold-40124	27392	36091	Protein of unknown function
AGROCRI.1P.001303.1	1P.scaffold-11308	209	4421	Protein of unknown function
AGROCRI.1P.001304.1	1P.scaffold-823	620	2250	Protein of unknown function
AGROCRI.1P.001305.1	1P.scaffold-823	10204	10515	Protein of unknown function
AGROCRI.1P.001306.1	1P.scaffold-825	1179	2849	Elongator complex protein 3
AGROCRI.1P.001307.1	1P.scaffold-825	5780	11310	Nucleolar GTP-binding protein 1
AGROCRI.1P.001308.1	1P.scaffold-37086	2072	4107	Protein of unknown function
AGROCRI.1P.001309.1	1P.scaffold-34269	6878	8531	Protein of unknown function
AGROCRI.1P.001310.1	1P.scaffold-18551	1209	2360	Protein of unknown function
AGROCRI.1P.001311.1	1P.scaffold-19708	1431	5537	Protein of unknown function
AGROCRI.1P.001312.1	1P.scaffold-19708	7030	8124	Isocitrate dehydrogenase [NAD] subunit 2
AGROCRI.1P.001313.1	1P.scaffold-41466	541	4760	Protein of unknown function
AGROCRI.1P.001314.1	1P.scaffold-252	4568	6022	Protein of unknown function
AGROCRI.1P.001315.1	1P.scaffold-252	6071	8591	Protein of unknown function
AGROCRI.1P.001316.1	1P.scaffold-1920	1488	3742	Protein of unknown function
AGROCRI.1P.001317.1	1P.scaffold-34898	1897	3592	Protein of unknown function
AGROCRI.1P.001318.1	1P.scaffold-449	270	482	Protein of unknown function
AGROCRI.1P.001319.1	1P.scaffold-449	2779	4789	Protein of unknown function
AGROCRI.1P.001320.1	1P.scaffold-953	1029	2617	Protein of unknown function
AGROCRI.1P.001321.1	1P.scaffold-953	2758	3639	Protein of unknown function
AGROCRI.1P.001322.1	1P.scaffold-223	37	504	Protein of unknown function
AGROCRI.1P.001323.1	1P.scaffold-223	661	1398	Protein of unknown function
AGROCRI.1P.001324.1	1P.scaffold-223	1490	1867	Protein of unknown function
AGROCRI.1P.001325.1	1P.scaffold-492	53	1857	Protein of unknown function
AGROCRI.1P.001326.1	1P.scaffold-492	4871	5749	Protein of unknown function
AGROCRI.1P.001327.1	1P.scaffold-4249	38	2718	Protein of unknown function
AGROCRI.1P.001328.1	1P.scaffold-461	1475	6728	Protein of unknown function
AGROCRI.1P.001329.1	1P.scaffold-1499	1319	3993	Protein of unknown function
AGROCRI.1P.001330.1	1P.scaffold-3517	404	3948	Protein of unknown function
AGROCRI.1P.001331.1	1P.scaffold-3517	6699	7949	Vacuolar aspartic protease
AGROCRI.1P.001332.1	1P.scaffold-603	1098	5216	Protein of unknown function
AGROCRI.1P.001333.1	1P.scaffold-291	2948	3823	Protein of unknown function
AGROCRI.1P.001334.1	1P.scaffold-291	5422	9293	Protein of unknown function
AGROCRI.1P.001335.1	1P.scaffold-708	17147	18019	V-type proton ATPase subunit D
AGROCRI.1P.001336.1	1P.scaffold-708	18870	22450	Succinate dehydrogenase [ubiquinone] flavoprotein subunit
AGROCRI.1P.001337.1	1P.scaffold-2712	2081	3143	Sm-like protein LSM1B
AGROCRI.1P.001338.1	1P.scaffold-2096	113	3250	BTB/POZ domain and ankyrin repeat-containing protein NPR1
AGROCRI.1P.001339.1	1P.scaffold-539	3935	6806	Protein of unknown function
AGROCRI.1P.001340.1	1P.scaffold-857	149	2612	General transcription and DNA repair factor IIH helicase subunit XPD
AGROCRI.1P.001341.1	1P.scaffold-857	9407	10033	Probable superoxide dismutase [Mn]
AGROCRI.1P.001342.1	1P.scaffold-95	5953	8449	Protein of unknown function
AGROCRI.1P.001343.1	1P.scaffold-39780	33	1328	Protein of unknown function
AGROCRI.1P.001344.1	1P.scaffold-8627	4664	7039	Protein of unknown function
AGROCRI.1P.001345.1	1P.scaffold-1282	7415	10228	Tubulin alpha-1 chain
AGROCRI.1P.001346.1	1P.scaffold-111	216	1584	Protein of unknown function
AGROCRI.1P.001347.1	1P.scaffold-595	3492	7894	Protein of unknown function
AGROCRI.1P.001348.1	1P.scaffold-11049	538	2165	Protein of unknown function
AGROCRI.1P.001349.1	1P.scaffold-939	632	2362	Microtubule-associated protein RP/EB family member 1A
AGROCRI.1P.001350.1	1P.scaffold-939	5605	6147	Protein of unknown function
AGROCRI.1P.001351.1	1P.scaffold-379	6915	11325	Protein of unknown function
AGROCRI.1P.001352.1	1P.scaffold-1717	4569	5714	Cytoplasmic tRNA 2-thiolation protein 1
AGROCRI.1P.001353.1	1P.scaffold-1717	8991	10304	Glycylpeptide N-tetradecanoyltransferase
AGROCRI.1P.001354.1	1P.scaffold-1717	18868	20013	Cytoplasmic tRNA 2-thiolation protein 1
AGROCRI.1P.001355.1	1P.scaffold-1724	5209	8344	IAA-amino acid hydrolase ILR1-like 5
AGROCRI.1P.001356.1	1P.scaffold-2086	145	1662	Probable transaldolase
AGROCRI.1P.001357.1	1P.scaffold-2086	2535	3584	Protein of unknown function
AGROCRI.1P.001358.1	1P.scaffold-482	11	3226	Protein of unknown function
AGROCRI.1P.001359.1	1P.scaffold-11874	226	1829	Protein of unknown function
AGROCRI.1P.001360.1	1P.scaffold-99	1928	2770	Protein of unknown function
AGROCRI.1P.001361.1	1P.scaffold-99	13541	17183	Protein of unknown function
AGROCRI.1P.001362.1	1P.scaffold-1047	767	2915	Protein of unknown function
AGROCRI.1P.001363.1	1P.scaffold-1047	3448	3843	Protein of unknown function
AGROCRI.1P.001364.1	1P.scaffold-363	951	1175	Protein of unknown function
AGROCRI.1P.001365.1	1P.scaffold-363	4171	4419	Protein of unknown function
AGROCRI.1P.001366.1	1P.scaffold-363	4689	5234	Protein of unknown function
AGROCRI.1P.001367.1	1P.scaffold-3744	1016	5028	Protein of unknown function
AGROCRI.1P.001368.1	1P.scaffold-1551	2061	4501	Protein of unknown function
AGROCRI.1P.001369.1	1P.scaffold-5450	425	1342	Protein of unknown function
AGROCRI.1P.001370.1	1P.scaffold-10234	120	3349	Protein of unknown function
AGROCRI.1P.001371.1	1P.scaffold-982	5803	9018	Protein of unknown function
AGROCRI.1P.001372.1	1P.scaffold-213	401	1626	Protein of unknown function
AGROCRI.1P.001373.1	1P.scaffold-213	4099	6033	Protein of unknown function
AGROCRI.1P.001374.1	1P.scaffold-5830	1	1281	ABC transporter G family member 37
AGROCRI.1P.001375.1	1P.scaffold-5202	3009	5619	Primary amine oxidase
AGROCRI.1P.001376.1	1P.scaffold-2992	385	3071	Poly(A) polymerase PAPalpha
AGROCRI.1P.001377.1	1P.scaffold-2992	3926	6271	Phosphatidylinositol 4-kinase PIK1alpha
AGROCRI.1P.001378.1	1P.scaffold-1631	27	1076	Protein of unknown function
AGROCRI.1P.001379.1	1P.scaffold-1631	177	1570	Protein of unknown function
AGROCRI.1P.001380.1	1P.scaffold-1290	330	1272	Protein of unknown function
AGROCRI.1P.001381.1	1P.scaffold-1290	3062	3766	Protein of unknown function
AGROCRI.1P.001382.1	1P.scaffold-13377	183	1656	Protein of unknown function
AGROCRI.1P.001383.1	1P.scaffold-4862	214	4046	Protein of unknown function
AGROCRI.1P.001384.1	1P.scaffold-4862	8558	11722	5'-3' exoribonuclease 2
AGROCRI.1P.001385.1	1P.scaffold-1071	1410	3703	Protein of unknown function
AGROCRI.1P.001386.1	1P.scaffold-317	2758	7665	Protein of unknown function
AGROCRI.1P.001387.1	1P.scaffold-378	9919	10302	Protein of unknown function
AGROCRI.1P.001388.1	1P.scaffold-378	18102	20094	Protein of unknown function
AGROCRI.1P.001389.1	1P.scaffold-440	355	2833	Protein of unknown function
AGROCRI.1P.001390.1	1P.scaffold-2458	945	2619	Protein of unknown function
AGROCRI.1P.001391.1	1P.scaffold-2458	5430	5603	Protein of unknown function
AGROCRI.1P.001392.1	1P.scaffold-921	760	1965	Protein of unknown function
AGROCRI.1P.001393.1	1P.scaffold-921	3109	4440	Protein of unknown function
AGROCRI.1P.001394.1	1P.scaffold-921	5561	6064	Protein of unknown function
AGROCRI.1P.001395.1	1P.scaffold-403	3	2779	Protein of unknown function
AGROCRI.1P.001396.1	1P.scaffold-712	599	3582	Protein of unknown function
AGROCRI.1P.001397.1	1P.scaffold-712	6984	8003	Protein of unknown function
AGROCRI.1P.001398.1	1P.scaffold-5969	2	2037	Protein of unknown function
AGROCRI.1P.001399.1	1P.scaffold-355	4318	9758	Protein of unknown function
AGROCRI.1P.001400.1	1P.scaffold-971	1242	1595	Protein of unknown function
AGROCRI.1P.001401.1	1P.scaffold-971	2009	3736	Protein of unknown function
AGROCRI.1P.001402.1	1P.scaffold-113	2747	6102	Protein of unknown function
AGROCRI.1P.001403.1	1P.scaffold-113	8804	9571	Protein of unknown function
AGROCRI.1P.001404.1	1P.scaffold-39049	3	936	Protein of unknown function
AGROCRI.1P.001405.1	1P.scaffold-211	2	6565	Protein of unknown function
AGROCRI.1P.001406.1	1P.scaffold-15201	155	1835	Protein of unknown function
AGROCRI.1P.001407.1	1P.scaffold-19	2883	6884	Protein of unknown function
AGROCRI.1P.001408.1	1P.scaffold-1086	232	1308	Protein of unknown function
AGROCRI.1P.001409.1	1P.scaffold-1086	1887	3890	Protein of unknown function
AGROCRI.1P.001410.1	1P.scaffold-202	6002	10036	Protein of unknown function
AGROCRI.1P.001411.1	1P.scaffold-1155	30	3224	Protein of unknown function
AGROCRI.1P.001412.1	1P.scaffold-1140	78	1016	Protein of unknown function
AGROCRI.1P.001413.1	1P.scaffold-1140	1363	2742	Protein of unknown function
AGROCRI.1P.001414.1	1P.scaffold-1092	4250	5513	Protein of unknown function
AGROCRI.1P.001415.1	1P.scaffold-1092	7026	7572	Protein of unknown function
AGROCRI.1P.001416.1	1P.scaffold-644	6144	7105	Protein of unknown function
AGROCRI.1P.001417.1	1P.scaffold-644	7431	7847	Protein of unknown function
AGROCRI.1P.001418.1	1P.scaffold-4431	3031	3876	Protein of unknown function
AGROCRI.1P.001419.1	1P.scaffold-4431	4739	5673	Protein of unknown function
AGROCRI.1P.001420.1	1P.scaffold-6878	7013	8346	Protein of unknown function
AGROCRI.1P.001421.1	1P.scaffold-285	721	5006	Protein of unknown function
AGROCRI.1P.001422.1	1P.scaffold-2811	3676	4421	Protein of unknown function
AGROCRI.1P.001423.1	1P.scaffold-2811	5322	5654	Protein of unknown function
AGROCRI.1P.001424.1	1P.scaffold-3477	143	1377	Phospholipid-transporting ATPase 2
AGROCRI.1P.001425.1	1P.scaffold-36479	948	2468	Protein of unknown function
AGROCRI.1P.001426.1	1P.scaffold-36479	7945	9138	ATP-dependent RNA helicase eIF4A
AGROCRI.1P.001427.1	1P.scaffold-36479	24697	25971	GTP-binding RHO-like protein
AGROCRI.1P.001428.1	1P.scaffold-241	177	2670	Protein of unknown function
AGROCRI.1P.001429.1	1P.scaffold-2152	1102	3573	Protein of unknown function
AGROCRI.1P.001430.1	1P.scaffold-1065	1676	3536	Protein of unknown function
AGROCRI.1P.001431.1	1P.scaffold-35413	1513	3275	Protein of unknown function
AGROCRI.1P.001432.1	1P.scaffold-754	853	1737	Cytochrome b-c1 complex subunit Rieske
AGROCRI.1P.001433.1	1P.scaffold-754	14279	15163	Cytochrome b-c1 complex subunit Rieske
AGROCRI.1P.001434.1	1P.scaffold-5524	1175	2801	Protein of unknown function
AGROCRI.1P.001435.1	1P.scaffold-78	881	2819	Protein of unknown function
AGROCRI.1P.001436.1	1P.scaffold-5530	69	786	Protein of unknown function
AGROCRI.1P.001437.1	1P.scaffold-5530	1027	1349	Protein of unknown function
AGROCRI.1P.001438.1	1P.scaffold-866	3065	3457	Protein of unknown function
AGROCRI.1P.001439.1	1P.scaffold-866	4785	6097	Protein of unknown function
AGROCRI.1P.001440.1	1P.scaffold-690	6025	8091	Protein of unknown function
AGROCRI.1P.001441.1	1P.scaffold-690	9556	10017	Protein of unknown function
AGROCRI.1P.001442.1	1P.scaffold-690	10461	11621	Protein of unknown function
AGROCRI.1P.001443.1	1P.scaffold-9775	1379	3831	Protein of unknown function
AGROCRI.1P.001444.1	1P.scaffold-20439	2735	5344	Nicotinamide/nicotinic acid mononucleotide adenylyltransferase
AGROCRI.1P.001445.1	1P.scaffold-13288	2	919	Kinesin-like protein KIN-7F
AGROCRI.1P.001446.1	1P.scaffold-837	1130	1654	Probable 6-phosphogluconolactonase 2
AGROCRI.1P.001447.1	1P.scaffold-837	3047	5332	Probable 6-phosphogluconolactonase 2
AGROCRI.1P.001448.1	1P.scaffold-12436	3	1002	Cyclin-dependent kinase E-1
AGROCRI.1P.001449.1	1P.scaffold-1773	360	2192	ABC transporter ATP-binding protein ARB1
AGROCRI.1P.001450.1	1P.scaffold-1773	15029	16861	ABC transporter ATP-binding protein ARB1
AGROCRI.1P.001451.1	1P.scaffold-1773	28697	30361	Phosphoglucomutase
AGROCRI.1P.001452.1	1P.scaffold-13148	345	1656	Protein of unknown function
AGROCRI.1P.001453.1	1P.scaffold-108	458	3699	Protein of unknown function
AGROCRI.1P.001454.1	1P.scaffold-1157	29	325	Protein of unknown function
AGROCRI.1P.001455.1	1P.scaffold-1157	391	2325	Protein of unknown function
AGROCRI.1P.001456.1	1P.scaffold-12657	5667	7056	Protein of unknown function
AGROCRI.1P.001457.1	1P.scaffold-480	22	3548	Protein of unknown function
AGROCRI.1P.001458.1	1P.scaffold-41571	1771	3720	Protein of unknown function
AGROCRI.1P.001459.1	1P.scaffold-37620	11073	14438	Protein of unknown function
AGROCRI.1P.001460.1	1P.scaffold-37620	28060	30231	Protein of unknown function
AGROCRI.1P.001461.1	1P.scaffold-1235	5462	6823	Protein of unknown function
AGROCRI.1P.001462.1	1P.scaffold-39034	1344	3118	Protein of unknown function
AGROCRI.1P.001463.1	1P.scaffold-3537	3743	5813	5-demethoxyubiquinone hydroxylase
AGROCRI.1P.001464.1	1P.scaffold-3537	6196	9068	Carbon catabolite-derepressing protein kinase
AGROCRI.1P.001465.1	1P.scaffold-6827	51	1855	Protein of unknown function
AGROCRI.1P.001466.1	1P.scaffold-668	4379	5587	Protein of unknown function
AGROCRI.1P.001467.1	1P.scaffold-668	17768	18595	Probable NADH-ubiquinone oxidoreductase 30.4 kDa subunit
AGROCRI.1P.001468.1	1P.scaffold-668	28487	29461	Aspartate--tRNA ligase
AGROCRI.1P.001469.1	1P.scaffold-1035	344	652	Protein of unknown function
AGROCRI.1P.001470.1	1P.scaffold-1035	834	1148	Protein of unknown function
AGROCRI.1P.001471.1	1P.scaffold-1035	1281	2096	Protein of unknown function
AGROCRI.1P.001472.1	1P.scaffold-828	230	3260	T-complex protein 1 subunit theta
AGROCRI.1P.001473.1	1P.scaffold-828	7634	10664	T-complex protein 1 subunit theta
AGROCRI.1P.001474.1	1P.scaffold-441	924	4197	Protein of unknown function
AGROCRI.1P.001475.1	1P.scaffold-15614	2	970	Beta-galactosidase 1
AGROCRI.1P.001476.1	1P.scaffold-4425	293	3560	Protein of unknown function
AGROCRI.1P.001477.1	1P.scaffold-618	185	3634	Protein of unknown function
AGROCRI.1P.001478.1	1P.scaffold-33845	11235	15995	Aquaporin NIP2-2
AGROCRI.1P.001479.1	1P.scaffold-34796	339	1291	Protein of unknown function
AGROCRI.1P.001480.1	1P.scaffold-1122	1753	3771	Protein of unknown function
AGROCRI.1P.001481.1	1P.scaffold-1122	4512	4943	Protein of unknown function
AGROCRI.1P.001482.1	1P.scaffold-422	333	2836	Protein of unknown function
AGROCRI.1P.001483.1	1P.scaffold-1689	9	4548	Protein of unknown function
AGROCRI.1P.001484.1	1P.scaffold-1652	1403	2593	Probable potassium transporter 14
AGROCRI.1P.001485.1	1P.scaffold-2010	351	2213	Protein of unknown function
AGROCRI.1P.001486.1	1P.scaffold-2010	2594	5947	Protein of unknown function
AGROCRI.1P.001487.1	1P.scaffold-3908	150	548	Protein of unknown function
AGROCRI.1P.001488.1	1P.scaffold-3908	1195	1893	Protein of unknown function
AGROCRI.1P.001489.1	1P.scaffold-206	587	1401	Protein of unknown function
AGROCRI.1P.001490.1	1P.scaffold-206	2702	3160	Protein of unknown function
AGROCRI.1P.001491.1	1P.scaffold-39545	1523	2822	Protein of unknown function
AGROCRI.1P.001492.1	1P.scaffold-973	191	670	Protein of unknown function
AGROCRI.1P.001493.1	1P.scaffold-973	1677	4862	Protein of unknown function
AGROCRI.1P.001494.1	1P.scaffold-1077	124	1333	Protein of unknown function
AGROCRI.1P.001495.1	1P.scaffold-1077	2971	3267	Protein of unknown function
AGROCRI.1P.001496.1	1P.scaffold-2237	370	2382	Enoyl-[acyl-carrier-protein] reductase [NADH] FabI
AGROCRI.1P.001497.1	1P.scaffold-2237	2624	3370	Branched-chain-amino-acid aminotransferase
AGROCRI.1P.001498.1	1P.scaffold-30879	78	2612	Protein of unknown function
AGROCRI.1P.001499.1	1P.scaffold-30879	3301	4650	Protein of unknown function
AGROCRI.1P.001500.1	1P.scaffold-30879	5263	6336	Histone-lysine N-methyltransferase
AGROCRI.1P.001501.1	1P.scaffold-31080	9582	11579	Protein of unknown function
AGROCRI.1P.001502.1	1P.scaffold-958	3502	3960	DNA-directed RNA polymerase II subunit rpb7
AGROCRI.1P.001503.1	1P.scaffold-958	4661	5185	54S ribosomal protein L23
AGROCRI.1P.001504.1	1P.scaffold-958	6167	9859	DNA-directed RNA polymerase II subunit RPB2
AGROCRI.1P.001505.1	1P.scaffold-1109	6183	9255	Protein of unknown function
AGROCRI.1P.001506.1	1P.scaffold-1280	2821	7562	Protein of unknown function
AGROCRI.1P.001507.1	1P.scaffold-732	15431	19380	Protein of unknown function
AGROCRI.1P.001508.1	1P.scaffold-15300	357	533	Protein of unknown function
AGROCRI.1P.001509.1	1P.scaffold-15300	666	1143	Protein of unknown function
AGROCRI.1P.001510.1	1P.scaffold-1957	577	1716	Protein of unknown function
AGROCRI.1P.001511.1	1P.scaffold-1957	2258	3016	Protein of unknown function
AGROCRI.1P.001512.1	1P.scaffold-1957	11380	12339	Thioredoxin reductase
AGROCRI.1P.001513.1	1P.scaffold-1701	3855	5307	Protein of unknown function
AGROCRI.1P.001514.1	1P.scaffold-1701	5441	6599	Protein of unknown function
AGROCRI.1P.001515.1	1P.scaffold-5534	1518	2726	Protein of unknown function
AGROCRI.1P.001516.1	1P.scaffold-5534	3157	3507	Protein of unknown function
AGROCRI.1P.001517.1	1P.scaffold-41480	2503	3931	Protein of unknown function
AGROCRI.1P.001518.1	1P.scaffold-115	2338	3474	Protein of unknown function
AGROCRI.1P.001519.1	1P.scaffold-115	4477	6900	Phosphatidylserine decarboxylase proenzyme 2
AGROCRI.1P.001520.1	1P.scaffold-115	8196	10418	Protein of unknown function
AGROCRI.1P.001521.1	1P.scaffold-11978	2286	4152	Protein of unknown function
AGROCRI.1P.001522.1	1P.scaffold-2692	2	1897	Protein of unknown function
AGROCRI.1P.001523.1	1P.scaffold-7083	1142	2343	Protein of unknown function
AGROCRI.1P.001524.1	1P.scaffold-1012	63	2728	Putative MO25-like protein At5g47540
AGROCRI.1P.001525.1	1P.scaffold-3959	7784	9097	GTPase Obg
AGROCRI.1P.001526.1	1P.scaffold-3959	9294	10376	Glyceraldehyde-3-phosphate dehydrogenase
AGROCRI.1P.001527.1	1P.scaffold-3959	11413	11946	Glyceraldehyde-3-phosphate dehydrogenase
AGROCRI.1P.001528.1	1P.scaffold-1958	6070	9369	Protein of unknown function
AGROCRI.1P.001529.1	1P.scaffold-898	8153	10403	Phenylalanine ammonia-lyase
AGROCRI.1P.001530.1	1P.scaffold-898	12548	13667	Protein of unknown function
AGROCRI.1P.001531.1	1P.scaffold-702	446	4890	Protein of unknown function
AGROCRI.1P.001532.1	1P.scaffold-660	2734	6003	60S ribosomal protein L12-B
AGROCRI.1P.001533.1	1P.scaffold-660	11304	12437	Sterol 24-C-methyltransferase
AGROCRI.1P.001534.1	1P.scaffold-60	2631	4693	Protein of unknown function
AGROCRI.1P.001535.1	1P.scaffold-60	7073	7459	Protein of unknown function
AGROCRI.1P.001536.1	1P.scaffold-1902	1992	4471	Protein of unknown function
AGROCRI.1P.001537.1	1P.scaffold-1148	608	5525	Protein of unknown function
AGROCRI.1P.001538.1	1P.scaffold-1010	61	1356	Protein of unknown function
AGROCRI.1P.001539.1	1P.scaffold-1010	2253	3227	Protein of unknown function
AGROCRI.1P.001540.1	1P.scaffold-3128	1553	6422	Protein of unknown function
AGROCRI.1P.001541.1	1P.scaffold-337	2103	4472	Protein of unknown function
AGROCRI.1P.001542.1	1P.scaffold-788	3643	7275	Protein of unknown function
AGROCRI.1P.001543.1	1P.scaffold-788	10925	12502	Protein of unknown function
AGROCRI.1P.001544.1	1P.scaffold-397	1274	1893	Protein of unknown function
AGROCRI.1P.001545.1	1P.scaffold-1168	1330	5609	Protein of unknown function
AGROCRI.1P.001546.1	1P.scaffold-30001	2616	4211	Protein of unknown function
AGROCRI.1P.001547.1	1P.scaffold-453	169	3382	Protein of unknown function
AGROCRI.1P.001548.1	1P.scaffold-925	2	646	Protein of unknown function
AGROCRI.1P.001549.1	1P.scaffold-925	733	1566	Protein of unknown function
AGROCRI.1P.001550.1	1P.scaffold-334	2788	5854	Protein of unknown function
AGROCRI.1P.001551.1	1P.scaffold-3743	362	1928	Protein of unknown function
AGROCRI.1P.001552.1	1P.scaffold-2866	1180	5789	Protein of unknown function
AGROCRI.1P.001553.1	1P.scaffold-39	11684	16263	Protein of unknown function
AGROCRI.1P.001554.1	1P.scaffold-2932	5899	7660	Protein of unknown function
AGROCRI.1P.001555.1	1P.scaffold-177	341	2894	Protein of unknown function
AGROCRI.1P.001556.1	1P.scaffold-1181	250	2750	Protein of unknown function
AGROCRI.1P.001557.1	1P.scaffold-927	998	3859	Protein of unknown function
AGROCRI.1P.001558.1	1P.scaffold-17349	5435	7342	Protein of unknown function
AGROCRI.1P.001559.1	1P.scaffold-1078	30	4012	Protein of unknown function
AGROCRI.1P.001560.1	1P.scaffold-229	2951	5557	12S seed storage globulin 1
AGROCRI.1P.001561.1	1P.scaffold-207	336	1148	Protein of unknown function
AGROCRI.1P.001562.1	1P.scaffold-207	8282	9868	Protein of unknown function
AGROCRI.1P.001563.1	1P.scaffold-6663	1137	1565	Splicing factor U2af large subunit A
AGROCRI.1P.001564.1	1P.scaffold-1926	1437	3162	Protein of unknown function
AGROCRI.1P.001565.1	1P.scaffold-386	5567	9133	Protein of unknown function
AGROCRI.1P.001566.1	1P.scaffold-33991	1830	2330	Protein of unknown function
AGROCRI.1P.001567.1	1P.scaffold-33991	2410	3137	Protein of unknown function
AGROCRI.1P.001568.1	1P.scaffold-10856	2330	5163	Protein of unknown function
AGROCRI.1P.001569.1	1P.scaffold-3508	1270	2351	Protein of unknown function
AGROCRI.1P.001570.1	1P.scaffold-3508	3702	5138	Aryl-phospho-beta-D-glucosidase BglA
AGROCRI.1P.001571.1	1P.scaffold-41593	1286	2270	Protein of unknown function
AGROCRI.1P.001572.1	1P.scaffold-635	444	2198	Protein of unknown function
AGROCRI.1P.001573.1	1P.scaffold-6165	8025	9031	Protein of unknown function
AGROCRI.1P.001574.1	1P.scaffold-1120	5213	8046	Protein of unknown function
AGROCRI.1P.001575.1	1P.scaffold-11571	1866	4837	Protein of unknown function
AGROCRI.1P.001576.1	1P.scaffold-5821	5696	8384	Probable trehalose-phosphate phosphatase 4
AGROCRI.1P.001577.1	1P.scaffold-35933	50	3918	Amidophosphoribosyltransferase
AGROCRI.1P.001578.1	1P.scaffold-141	1204	5058	Protein of unknown function
AGROCRI.1P.001579.1	1P.scaffold-11207	1336	2570	Protein of unknown function
AGROCRI.1P.001580.1	1P.scaffold-384	70	1574	Protein of unknown function
AGROCRI.1P.001581.1	1P.scaffold-384	5931	7718	Protein of unknown function
AGROCRI.1P.001582.1	1P.scaffold-40483	1688	2895	Protein of unknown function
AGROCRI.1P.001583.1	1P.scaffold-12510	4996	6646	Protein of unknown function
AGROCRI.1P.001584.1	1P.scaffold-534	2033	5402	Protein of unknown function
AGROCRI.1P.001585.1	1P.scaffold-3593	1925	2982	Protein of unknown function
AGROCRI.1P.001586.1	1P.scaffold-1292	8722	12013	Protein of unknown function
AGROCRI.1P.001587.1	1P.scaffold-580	1007	2002	Protein of unknown function
AGROCRI.1P.001588.1	1P.scaffold-580	4382	5065	Protein of unknown function
AGROCRI.1P.001589.1	1P.scaffold-1234	23	681	Protein of unknown function
AGROCRI.1P.001590.1	1P.scaffold-1234	815	1171	Protein of unknown function
AGROCRI.1P.001591.1	1P.scaffold-475	22	372	Protein of unknown function
AGROCRI.1P.001592.1	1P.scaffold-475	3001	3756	Protein of unknown function
AGROCRI.1P.001593.1	1P.scaffold-945	3410	6219	Protein of unknown function
AGROCRI.1P.001594.1	1P.scaffold-4021	25	1255	Kinesin-like protein KIN-14K
AGROCRI.1P.001595.1	1P.scaffold-304	874	5894	Protein of unknown function
AGROCRI.1P.001596.1	1P.scaffold-2173	3687	7181	Protein of unknown function
AGROCRI.1P.001597.1	1P.scaffold-8122	1515	4951	Protein of unknown function
AGROCRI.1P.001598.1	1P.scaffold-8122	5115	5459	Protein of unknown function
AGROCRI.1P.001599.1	1P.scaffold-107	2611	3541	60S ribosomal protein L7
AGROCRI.1P.001600.1	1P.scaffold-107	9235	10119	Protein of unknown function
AGROCRI.1P.001601.1	1P.scaffold-3400	2588	4940	Protein of unknown function
AGROCRI.1P.001602.1	1P.scaffold-3400	6128	7450	Arginine biosynthesis bifunctional protein ArgJ
AGROCRI.1P.001603.1	1P.scaffold-333	765	2243	Protein of unknown function
AGROCRI.1P.001604.1	1P.scaffold-333	6639	7256	Protein of unknown function
AGROCRI.1P.001605.1	1P.scaffold-2025	812	3696	Protein of unknown function
AGROCRI.1P.001606.1	1P.scaffold-578	1299	3224	Protein of unknown function
AGROCRI.1P.001607.1	1P.scaffold-756	20710	25262	Protein translocase subunit SecA
AGROCRI.1P.001608.1	1P.scaffold-4165	14994	16597	Protein of unknown function
AGROCRI.1P.001609.1	1P.scaffold-343	1646	4635	Protein of unknown function
AGROCRI.1P.001610.1	1P.scaffold-10154	133	1570	Protein of unknown function
AGROCRI.1P.001611.1	1P.scaffold-5090	6969	9220	Protein of unknown function
AGROCRI.1P.001612.1	1P.scaffold-5027	125	1384	Protein of unknown function
AGROCRI.1P.001613.1	1P.scaffold-820	16945	18516	Riboflavin synthase
AGROCRI.1P.001614.1	1P.scaffold-820	19260	19847	Probable proteasome subunit beta type-4
AGROCRI.1P.001615.1	1P.scaffold-1467	9306	11582	Protein of unknown function
AGROCRI.1P.001616.1	1P.scaffold-193	9337	9918	Protein of unknown function
AGROCRI.1P.001617.1	1P.scaffold-193	10013	10716	Protein of unknown function
AGROCRI.1P.001618.1	1P.scaffold-785	3966	13818	Protein of unknown function
AGROCRI.1P.001619.1	1P.scaffold-41442	3335	4559	Protein of unknown function
AGROCRI.1P.001620.1	1P.scaffold-17432	2268	4352	Protein of unknown function
AGROCRI.1P.001621.1	1P.scaffold-4630	274	1651	Protein of unknown function
AGROCRI.1P.001622.1	1P.scaffold-214	1003	1518	Protein of unknown function
AGROCRI.1P.001623.1	1P.scaffold-214	3502	4062	Protein of unknown function
AGROCRI.1P.001624.1	1P.scaffold-604	90	3840	Protein of unknown function
AGROCRI.1P.001625.1	1P.scaffold-11475	1746	3838	Protein of unknown function
AGROCRI.1P.001626.1	1P.scaffold-4143	169	1013	Protein of unknown function
AGROCRI.1P.001627.1	1P.scaffold-1146	944	2842	Protein of unknown function
AGROCRI.1P.001628.1	1P.scaffold-6657	6844	9432	Protein of unknown function
AGROCRI.1P.001629.1	1P.scaffold-158	1837	3861	Protein of unknown function
AGROCRI.1P.001630.1	1P.scaffold-158	4633	5463	Protein of unknown function
AGROCRI.1P.001631.1	1P.scaffold-1060	2647	6125	Protein of unknown function
AGROCRI.1P.001632.1	1P.scaffold-361	3552	6502	Protein of unknown function
AGROCRI.1P.001633.1	1P.scaffold-18169	387	1420	Protein of unknown function
AGROCRI.1P.001634.1	1P.scaffold-6899	662	2128	Protein of unknown function
AGROCRI.1P.001635.1	1P.scaffold-2498	100	2495	Protein of unknown function
AGROCRI.1P.001636.1	1P.scaffold-10809	357	1028	General transcription and DNA repair factor IIH subunit TFB2
AGROCRI.1P.001637.1	1P.scaffold-265	162	1458	Protein of unknown function
AGROCRI.1P.001638.1	1P.scaffold-12245	7632	9010	Protein of unknown function
AGROCRI.1P.001639.1	1P.scaffold-300	635	1039	Protein of unknown function
AGROCRI.1P.001640.1	1P.scaffold-300	5637	6372	Protein of unknown function
AGROCRI.1P.001641.1	1P.scaffold-37821	1860	3259	Protein of unknown function
AGROCRI.1P.001642.1	1P.scaffold-435	470	6842	Protein of unknown function
AGROCRI.1P.001643.1	1P.scaffold-1380	1608	4028	Protein of unknown function
AGROCRI.1P.001644.1	1P.scaffold-1380	4931	6686	ATP-dependent RNA helicase DBP6
AGROCRI.1P.001645.1	1P.scaffold-6865	269	1081	Protein of unknown function
AGROCRI.1P.001646.1	1P.scaffold-13899	1649	2437	Phosphoglucan phosphatase LSF1
AGROCRI.1P.001647.1	1P.scaffold-6842	294	1293	Syn-pimara-7
AGROCRI.1P.001648.1	1P.scaffold-936	3950	7024	Protein of unknown function
AGROCRI.1P.001649.1	1P.scaffold-2560	1083	1851	Protein of unknown function
AGROCRI.1P.001650.1	1P.scaffold-26557	78	2612	Protein of unknown function
AGROCRI.1P.001651.1	1P.scaffold-26557	3301	4088	Calcium/calmodulin-dependent protein kinase cmkA
AGROCRI.1P.001652.1	1P.scaffold-35797	232	798	Protein of unknown function
AGROCRI.1P.001653.1	1P.scaffold-11072	8259	15104	ATP-dependent RNA helicase DBP8
AGROCRI.1P.001654.1	1P.scaffold-2984	4339	5442	Protein of unknown function
AGROCRI.1P.001655.1	1P.scaffold-16580	595	1652	Protein of unknown function
AGROCRI.1P.001656.1	1P.scaffold-895	6419	8741	Protein of unknown function
AGROCRI.1P.001657.1	1P.scaffold-10950	1559	2433	Protein of unknown function
AGROCRI.1P.001658.1	1P.scaffold-27250	667	1683	Protein of unknown function
AGROCRI.1P.001659.1	1P.scaffold-1072	1762	4377	Protein of unknown function
AGROCRI.1P.001660.1	1P.scaffold-1072	17268	17804	Protein of unknown function
AGROCRI.1P.001661.1	1P.scaffold-1184	2220	3808	Protein of unknown function
AGROCRI.1P.001662.1	1P.scaffold-1184	4223	5581	Protein of unknown function
AGROCRI.1P.001663.1	1P.scaffold-1381	1	1422	Protein of unknown function
AGROCRI.1P.001664.1	1P.scaffold-1269	56	1924	Protein of unknown function
AGROCRI.1P.001665.1	1P.scaffold-781	8975	9584	Protein of unknown function
AGROCRI.1P.001666.1	1P.scaffold-17626	9503	10319	Protein of unknown function
AGROCRI.1P.001667.1	1P.scaffold-7344	502	1758	Protein of unknown function
AGROCRI.1P.001668.1	1P.scaffold-7344	2302	2805	Protein of unknown function
AGROCRI.1P.001669.1	1P.scaffold-612	34	3519	Protein of unknown function
AGROCRI.1P.001670.1	1P.scaffold-1068	2168	5060	Protein of unknown function
AGROCRI.1P.001671.1	1P.scaffold-19289	950	3043	GTPase Der
AGROCRI.1P.001672.1	1P.scaffold-32709	122	1073	Protein of unknown function
AGROCRI.1P.001673.1	1P.scaffold-6391	37	1511	Oxygen-dependent coproporphyrinogen-III oxidase
AGROCRI.1P.001674.1	1P.scaffold-1317	367	746	Protein of unknown function
AGROCRI.1P.001675.1	1P.scaffold-1317	1018	1323	Protein of unknown function
AGROCRI.1P.001676.1	1P.scaffold-9389	67	786	Polyamine oxidase 5
AGROCRI.1P.001677.1	1P.scaffold-659	21862	26913	Protein of unknown function
AGROCRI.1P.001678.1	1P.scaffold-29134	256	1245	Protein of unknown function
AGROCRI.1P.001679.1	1P.scaffold-1041	2257	7110	Transcription factor of morphogenesis MCM1
AGROCRI.1P.001680.1	1P.scaffold-22943	386	1694	Syn-copalyl diphosphate synthase
AGROCRI.1P.001681.1	1P.scaffold-4493	118	1332	Protein POLLENLESS 3-LIKE 2
AGROCRI.1P.001682.1	1P.scaffold-10276	1154	1844	Protein of unknown function
AGROCRI.1P.001683.1	1P.scaffold-1450	3280	6507	Transcriptional repressor TUP1
AGROCRI.1P.001684.1	1P.scaffold-2383	102	4449	ATP-dependent RNA helicase ROK1
AGROCRI.1P.001685.1	1P.scaffold-33013	3291	6955	Protein of unknown function
AGROCRI.1P.001686.1	1P.scaffold-1840	1818	2717	Protein of unknown function
AGROCRI.1P.001687.1	1P.scaffold-1840	10654	17144	Protein of unknown function
AGROCRI.1P.001688.1	1P.scaffold-1557	1622	3042	Protein of unknown function
AGROCRI.1P.001689.1	1P.scaffold-4192	4359	7322	Protein of unknown function
AGROCRI.1P.001690.1	1P.scaffold-277	170	493	Protein of unknown function
AGROCRI.1P.001691.1	1P.scaffold-277	629	3446	Protein of unknown function
AGROCRI.1P.001692.1	1P.scaffold-4526	2679	3899	Protein of unknown function
AGROCRI.1P.001693.1	1P.scaffold-4089	23	1165	Protein of unknown function
AGROCRI.1P.001694.1	1P.scaffold-4089	4400	5858	Casein kinase II subunit beta
AGROCRI.1P.001695.1	1P.scaffold-1308	982	2666	Protein of unknown function
AGROCRI.1P.001696.1	1P.scaffold-1308	7340	8935	Protein of unknown function
AGROCRI.1P.001697.1	1P.scaffold-2295	462	2435	40S ribosomal protein S13
AGROCRI.1P.001698.1	1P.scaffold-3250	716	2597	60S ribosomal protein L2
AGROCRI.1P.001699.1	1P.scaffold-3250	13726	14697	Protein of unknown function
AGROCRI.1P.001700.1	1P.scaffold-15298	29	532	Protein of unknown function
AGROCRI.1P.001701.1	1P.scaffold-15298	560	862	Protein of unknown function
AGROCRI.1P.001702.1	1P.scaffold-42242	1549	2620	V-type proton ATPase subunit E
AGROCRI.1P.001703.1	1P.scaffold-1698	1756	4282	Protein of unknown function
AGROCRI.1P.001704.1	1P.scaffold-669	11403	12095	Protein of unknown function
AGROCRI.1P.001705.1	1P.scaffold-669	12357	15295	PTS system beta-glucoside-specific EIIBCA component
AGROCRI.1P.001706.1	1P.scaffold-965	3291	4528	Protein of unknown function
AGROCRI.1P.001707.1	1P.scaffold-27632	5440	7885	Protein of unknown function
AGROCRI.1P.001708.1	1P.scaffold-237	1243	4237	Protein of unknown function
AGROCRI.1P.001709.1	1P.scaffold-11219	1139	2845	Protein of unknown function
AGROCRI.1P.001710.1	1P.scaffold-2989	623	1876	Protein of unknown function
AGROCRI.1P.001711.1	1P.scaffold-2043	181	911	Protein of unknown function
AGROCRI.1P.001712.1	1P.scaffold-2043	3277	3732	Protein of unknown function
AGROCRI.1P.001713.1	1P.scaffold-1950	4270	7299	Protein of unknown function
AGROCRI.1P.001714.1	1P.scaffold-2393	381	1752	Vacuole membrane protein KMS2
AGROCRI.1P.001715.1	1P.scaffold-1267	545	1698	Protein of unknown function
AGROCRI.1P.001716.1	1P.scaffold-470	6648	8405	Protein of unknown function
AGROCRI.1P.001717.1	1P.scaffold-1811	55	2551	Protein of unknown function
AGROCRI.1P.001718.1	1P.scaffold-8164	3510	4938	Protein of unknown function
AGROCRI.1P.001719.1	1P.scaffold-4791	4578	5768	Protein of unknown function
AGROCRI.1P.001720.1	1P.scaffold-538	553	3639	Protein of unknown function
AGROCRI.1P.001721.1	1P.scaffold-8222	2210	3245	Senescence-specific cysteine protease SAG39
AGROCRI.1P.001722.1	1P.scaffold-3598	10472	12589	Protein of unknown function
AGROCRI.1P.001723.1	1P.scaffold-1693	4907	6318	Protein of unknown function
AGROCRI.1P.001724.1	1P.scaffold-560	1276	3403	Protein of unknown function
AGROCRI.1P.001725.1	1P.scaffold-1129	1150	4032	Protein of unknown function
AGROCRI.1P.001726.1	1P.scaffold-393	4186	8926	Protein of unknown function
AGROCRI.1P.001727.1	1P.scaffold-579	1472	3049	Protein of unknown function
AGROCRI.1P.001728.1	1P.scaffold-579	3215	3853	Protein of unknown function
AGROCRI.1P.001729.1	1P.scaffold-39011	1235	2694	Polycomb group protein EMF2B
AGROCRI.1P.001730.1	1P.scaffold-2115	8039	9090	Protein of unknown function
AGROCRI.1P.001731.1	1P.scaffold-16766	46	790	5'-3' exoribonuclease 3
AGROCRI.1P.001732.1	1P.scaffold-312	4377	6230	Protein of unknown function
AGROCRI.1P.001733.1	1P.scaffold-6523	479	4846	Protein of unknown function
AGROCRI.1P.001734.1	1P.scaffold-6523	6158	10941	Protein of unknown function
AGROCRI.1P.001735.1	1P.scaffold-17980	639	2066	Protein of unknown function
AGROCRI.1P.001736.1	1P.scaffold-17980	2337	2429	Protein of unknown function
AGROCRI.1P.001737.1	1P.scaffold-1328	2235	4910	Protein of unknown function
AGROCRI.1P.001738.1	1P.scaffold-874	1990	3336	Protein of unknown function
AGROCRI.1P.001739.1	1P.scaffold-874	4268	7081	ATP-dependent RNA helicase DBP10
AGROCRI.1P.001740.1	1P.scaffold-16528	300	1875	ABC transporter G family member 45
AGROCRI.1P.001741.1	1P.scaffold-486	2669	4030	Protein of unknown function
AGROCRI.1P.001742.1	1P.scaffold-486	4641	5865	Protein of unknown function
AGROCRI.1P.001743.1	1P.scaffold-1973	805	1344	Superoxide dismutase [Mn]
AGROCRI.1P.001744.1	1P.scaffold-1973	11006	12143	Protein of unknown function
AGROCRI.1P.001745.1	1P.scaffold-41734	2	728	Protein of unknown function
AGROCRI.1P.001746.1	1P.scaffold-62	60	3920	Protein of unknown function
AGROCRI.1P.001747.1	1P.scaffold-8271	1	960	Protein of unknown function
AGROCRI.1P.001748.1	1P.scaffold-3777	311	1625	Protein of unknown function
AGROCRI.1P.001749.1	1P.scaffold-3777	2146	2568	Protein of unknown function
AGROCRI.1P.001750.1	1P.scaffold-5421	7213	9980	Protein of unknown function
AGROCRI.1P.001751.1	1P.scaffold-1753	4832	6103	Protein of unknown function
AGROCRI.1P.001752.1	1P.scaffold-1480	5248	6092	Protein of unknown function
AGROCRI.1P.001753.1	1P.scaffold-388	81	470	Protein of unknown function
AGROCRI.1P.001754.1	1P.scaffold-388	1219	3392	Protein of unknown function
AGROCRI.1P.001755.1	1P.scaffold-41451	930	2356	Protein of unknown function
AGROCRI.1P.001756.1	1P.scaffold-35221	6192	9655	Protein of unknown function
AGROCRI.1P.001757.1	1P.scaffold-878	5958	8666	Protein of unknown function
AGROCRI.1P.001758.1	1P.scaffold-878	8564	9807	DNA replication licensing factor MCM4
AGROCRI.1P.001759.1	1P.scaffold-1133	244	2506	Protein of unknown function
AGROCRI.1P.001760.1	1P.scaffold-1326	2407	4217	Protein of unknown function
AGROCRI.1P.001761.1	1P.scaffold-36164	312	1448	Protein of unknown function
AGROCRI.1P.001762.1	1P.scaffold-38712	140	1496	Protein of unknown function
AGROCRI.1P.001763.1	1P.scaffold-1132	2413	3391	Coatomer subunit zeta-1
AGROCRI.1P.001764.1	1P.scaffold-342	536	5498	Protein of unknown function
AGROCRI.1P.001765.1	1P.scaffold-147	2106	3394	Protein of unknown function
AGROCRI.1P.001766.1	1P.scaffold-147	5087	5776	Protein of unknown function
AGROCRI.1P.001767.1	1P.scaffold-411	560	3698	Protein of unknown function
AGROCRI.1P.001768.1	1P.scaffold-13393	2817	5307	Protein of unknown function
AGROCRI.1P.001769.1	1P.scaffold-1027	628	2761	Protein of unknown function
AGROCRI.1P.001770.1	1P.scaffold-1697	1316	2840	Protein of unknown function
AGROCRI.1P.001771.1	1P.scaffold-6289	425	2352	NADH-quinone oxidoreductase subunit I
AGROCRI.1P.001772.1	1P.scaffold-1069	1269	3822	Protein of unknown function
AGROCRI.1P.001773.1	1P.scaffold-4859	181	2060	Protein of unknown function
AGROCRI.1P.001774.1	1P.scaffold-772	635	2134	S-(hydroxymethyl)glutathione dehydrogenase
AGROCRI.1P.001775.1	1P.scaffold-772	4252	5055	Proteasome subunit beta type-2
AGROCRI.1P.001776.1	1P.scaffold-218	1739	4426	Protein of unknown function
AGROCRI.1P.001777.1	1P.scaffold-28627	88	1241	Protein of unknown function
AGROCRI.1P.001778.1	1P.scaffold-169	4358	5973	Protein of unknown function
AGROCRI.1P.001779.1	1P.scaffold-11729	513	1620	ATP-dependent RNA helicase ROK1
AGROCRI.1P.001780.1	1P.scaffold-601	867	2543	Protein of unknown function
AGROCRI.1P.001781.1	1P.scaffold-601	4711	5115	Protein of unknown function
AGROCRI.1P.001782.1	1P.scaffold-119	3128	5268	Protein of unknown function
AGROCRI.1P.001783.1	1P.scaffold-731	4746	5249	Translationally-controlled tumor protein homolog
AGROCRI.1P.001784.1	1P.scaffold-731	17462	17965	Translationally-controlled tumor protein homolog
AGROCRI.1P.001785.1	1P.scaffold-12507	139	1188	Protein of unknown function
AGROCRI.1P.001786.1	1P.scaffold-4834	886	2455	Protein of unknown function
AGROCRI.1P.001787.1	1P.scaffold-12050	134	725	Protein of unknown function
AGROCRI.1P.001788.1	1P.scaffold-13113	605	1303	Protein of unknown function
AGROCRI.1P.001789.1	1P.scaffold-14156	398	1467	Protein of unknown function
AGROCRI.1P.001790.1	1P.scaffold-527	261	1690	Protein of unknown function
AGROCRI.1P.001791.1	1P.scaffold-2213	783	2875	Protein of unknown function
AGROCRI.1P.001792.1	1P.scaffold-22511	3532	4656	Protein of unknown function
AGROCRI.1P.001793.1	1P.scaffold-997	6314	6958	Protein of unknown function
AGROCRI.1P.001794.1	1P.scaffold-997	9116	9646	Protein of unknown function
AGROCRI.1P.001795.1	1P.scaffold-175	8668	9949	Protein of unknown function
AGROCRI.1P.001796.1	1P.scaffold-2364	2	565	Heat shock protein SSA2
AGROCRI.1P.001797.1	1P.scaffold-2364	1101	3044	Heat shock protein SSA2
AGROCRI.1P.001798.1	1P.scaffold-1374	1591	3966	Vesicular-fusion protein SEC18
AGROCRI.1P.001799.1	1P.scaffold-1374	4208	6055	Vesicular-fusion protein SEC18
AGROCRI.1P.001800.1	1P.scaffold-2718	64	2335	tRNA uridine 5-carboxymethylaminomethyl modification enzyme MnmG
AGROCRI.1P.001801.1	1P.scaffold-2785	3101	4804	Phosphoribosylaminoimidazole carboxylase
AGROCRI.1P.001802.1	1P.scaffold-2785	7179	8882	Phosphoribosylaminoimidazole carboxylase
AGROCRI.1P.001803.1	1P.scaffold-8592	568	1250	Protein of unknown function
AGROCRI.1P.001804.1	1P.scaffold-1372	10726	11067	Eukaryotic translation initiation factor 5A
AGROCRI.1P.001805.1	1P.scaffold-1372	11357	11698	Eukaryotic translation initiation factor 5A
AGROCRI.1P.001806.1	1P.scaffold-11871	1929	2391	Protein of unknown function
AGROCRI.1P.001807.1	1P.scaffold-3481	2590	5174	Protein of unknown function
AGROCRI.1P.001808.1	1P.scaffold-8380	1157	1923	Protein of unknown function
AGROCRI.1P.001809.1	1P.scaffold-6553	104	535	Protein of unknown function
AGROCRI.1P.001810.1	1P.scaffold-6553	2166	2597	Protein of unknown function
AGROCRI.1P.001811.1	1P.scaffold-41456	567	2264	Protein of unknown function
AGROCRI.1P.001812.1	1P.scaffold-37608	7682	9480	Protein of unknown function
AGROCRI.1P.001813.1	1P.scaffold-37353	196	739	Protein of unknown function
AGROCRI.1P.001814.1	1P.scaffold-735	11192	12826	Protein of unknown function
AGROCRI.1P.001815.1	1P.scaffold-12747	6281	6873	Protein of unknown function
AGROCRI.1P.001816.1	1P.scaffold-6356	629	1418	Protein of unknown function
AGROCRI.1P.001817.1	1P.scaffold-663	20086	21144	Protein of unknown function
AGROCRI.1P.001818.1	1P.scaffold-663	21227	25369	Protein of unknown function
AGROCRI.1P.001819.1	1P.scaffold-496	313	791	Protein of unknown function
AGROCRI.1P.001820.1	1P.scaffold-12661	84	3108	Protein of unknown function
AGROCRI.1P.001821.1	1P.scaffold-2239	716	1546	Protein of unknown function
AGROCRI.1P.001822.1	1P.scaffold-4760	6470	7556	Protein of unknown function
AGROCRI.1P.001823.1	1P.scaffold-20224	43	75	Protein of unknown function
AGROCRI.1P.001824.1	1P.scaffold-20224	470	643	Protein of unknown function
AGROCRI.1P.001825.1	1P.scaffold-11922	251	5392	Protein of unknown function
AGROCRI.1P.001826.1	1P.scaffold-11922	5833	6963	Pyruvate dehydrogenase E1 component subunit alpha
AGROCRI.1P.001827.1	1P.scaffold-4371	1294	2442	S-adenosylmethionine synthase
AGROCRI.1P.001828.1	1P.scaffold-4371	5135	6796	Inorganic phosphate transporter PHO84
AGROCRI.1P.001829.1	1P.scaffold-3057	27	1066	Protein of unknown function
AGROCRI.1P.001830.1	1P.scaffold-3532	1	2608	Protein of unknown function
AGROCRI.1P.001831.1	1P.scaffold-4845	326	1653	Protein of unknown function
AGROCRI.1P.001832.1	1P.scaffold-2788	1008	3125	Protein of unknown function
AGROCRI.1P.001833.1	1P.scaffold-2113	6110	6891	Protein of unknown function
AGROCRI.1P.001834.1	1P.scaffold-1461	1222	5880	Acetyl-CoA hydrolase
AGROCRI.1P.001835.1	1P.scaffold-4838	77	511	Protein of unknown function
AGROCRI.1P.001836.1	1P.scaffold-326	937	2458	Protein of unknown function
AGROCRI.1P.001837.1	1P.scaffold-22476	122	767	Cysteine-rich receptor-like protein kinase 10
AGROCRI.1P.001838.1	1P.scaffold-3154	399	632	Protein of unknown function
AGROCRI.1P.001839.1	1P.scaffold-3154	1311	1544	Protein of unknown function
AGROCRI.1P.001840.1	1P.scaffold-888	145	2160	2-oxoglutarate dehydrogenase
AGROCRI.1P.001841.1	1P.scaffold-888	7527	10520	2-oxoglutarate dehydrogenase
AGROCRI.1P.001842.1	1P.scaffold-18376	62	711	Protein of unknown function
AGROCRI.1P.001843.1	1P.scaffold-839	4306	4632	Protein of unknown function
AGROCRI.1P.001844.1	1P.scaffold-839	7545	7871	Protein of unknown function
AGROCRI.1P.001845.1	1P.scaffold-1925	5274	8354	Protein of unknown function
AGROCRI.1P.001846.1	1P.scaffold-38	2986	4518	Lysine--tRNA ligase
AGROCRI.1P.001847.1	1P.scaffold-278	211	1146	Protein of unknown function
AGROCRI.1P.001848.1	1P.scaffold-278	2972	3379	Protein of unknown function
AGROCRI.1P.001849.1	1P.scaffold-1543	11917	13230	Protein of unknown function
AGROCRI.1P.001850.1	1P.scaffold-4803	999	2003	60S ribosomal protein L4-B
AGROCRI.1P.001851.1	1P.scaffold-9430	639	2227	Protein of unknown function
AGROCRI.1P.001852.1	1P.scaffold-88	1352	1726	Protein of unknown function
AGROCRI.1P.001853.1	1P.scaffold-88	2499	2873	Protein of unknown function
AGROCRI.1P.001854.1	1P.scaffold-979	2769	3182	Protein of unknown function
AGROCRI.1P.001855.1	1P.scaffold-979	3181	3636	Protein of unknown function
AGROCRI.1P.001856.1	1P.scaffold-1018	4846	7466	Protein of unknown function
AGROCRI.1P.001857.1	1P.scaffold-12719	2	1177	Protein of unknown function
AGROCRI.1P.001858.1	1P.scaffold-2351	211	7083	Pre-mRNA-splicing factor 8
AGROCRI.1P.001859.1	1P.scaffold-2351	20766	22763	Pre-mRNA-splicing factor 8
AGROCRI.1P.001860.1	1P.scaffold-36460	3996	5199	Protein of unknown function
AGROCRI.1P.001861.1	1P.scaffold-38310	77	742	Protein of unknown function
AGROCRI.1P.001862.1	1P.scaffold-584	2	608	Protein of unknown function
AGROCRI.1P.001863.1	1P.scaffold-2360	16783	18441	Tyrosine--tRNA ligase
AGROCRI.1P.001864.1	1P.scaffold-2299	122	1277	Protein of unknown function
AGROCRI.1P.001865.1	1P.scaffold-21311	17	1086	Protein of unknown function
AGROCRI.1P.001866.1	1P.scaffold-127	8521	12579	Adenylosuccinate synthetase
AGROCRI.1P.001867.1	1P.scaffold-137	1799	3655	Protein of unknown function
AGROCRI.1P.001868.1	1P.scaffold-9814	282	922	Protein of unknown function
AGROCRI.1P.001869.1	1P.scaffold-12359	3	1115	Protein of unknown function
AGROCRI.1P.001870.1	1P.scaffold-40	1662	4052	Protein of unknown function
AGROCRI.1P.001871.1	1P.scaffold-13549	86	2447	Protein of unknown function
AGROCRI.1P.001872.1	1P.scaffold-611	56	563	Protein of unknown function
AGROCRI.1P.001873.1	1P.scaffold-761	14792	17437	Aconitate hydratase A
AGROCRI.1P.001874.1	1P.scaffold-761	17484	18176	GTP cyclohydrolase-2
AGROCRI.1P.001875.1	1P.scaffold-884	2001	3682	Protein of unknown function
AGROCRI.1P.001876.1	1P.scaffold-29806	14319	17343	Protein of unknown function
AGROCRI.1P.001877.1	1P.scaffold-340	1288	1848	Protein of unknown function
AGROCRI.1P.001878.1	1P.scaffold-340	4070	4918	Protein of unknown function
AGROCRI.1P.001879.1	1P.scaffold-1918	2940	4309	Protein of unknown function
AGROCRI.1P.001880.1	1P.scaffold-1995	610	1791	Protein of unknown function
AGROCRI.1P.001881.1	1P.scaffold-10471	142	920	Protein of unknown function
AGROCRI.1P.001882.1	1P.scaffold-10487	973	1450	Protein of unknown function
AGROCRI.1P.001883.1	1P.scaffold-1444	1180	3642	DNA ligase 1
AGROCRI.1P.001884.1	1P.scaffold-1444	3903	6365	DNA ligase 1
AGROCRI.1P.001885.1	1P.scaffold-1249	1734	3377	Protein of unknown function
AGROCRI.1P.001886.1	1P.scaffold-4417	4139	4944	Protein of unknown function
AGROCRI.1P.001887.1	1P.scaffold-42936	2	582	Protein of unknown function
AGROCRI.1P.001888.1	1P.scaffold-9833	8639	9789	Protein of unknown function
AGROCRI.1P.001889.1	1P.scaffold-677	625	4454	GTPase Era
AGROCRI.1P.001890.1	1P.scaffold-561	2105	4378	Protein of unknown function
AGROCRI.1P.001891.1	1P.scaffold-398	6442	8732	Protein of unknown function
AGROCRI.1P.001892.1	1P.scaffold-93	1437	2612	Protein of unknown function
AGROCRI.1P.001893.1	1P.scaffold-93	4690	5022	Protein of unknown function
AGROCRI.1P.001894.1	1P.scaffold-1428	15981	20267	Protein of unknown function
AGROCRI.1P.001895.1	1P.scaffold-14565	1002	2243	Protein of unknown function
AGROCRI.1P.001896.1	1P.scaffold-14565	2956	3471	Protein of unknown function
AGROCRI.1P.001897.1	1P.scaffold-2109	9852	10343	Protein of unknown function
AGROCRI.1P.001898.1	1P.scaffold-2109	12225	12716	Protein of unknown function
AGROCRI.1P.001899.1	1P.scaffold-428	833	1689	Protein of unknown function
AGROCRI.1P.001900.1	1P.scaffold-1462	804	1994	Protein of unknown function
AGROCRI.1P.001901.1	1P.scaffold-1462	5192	5584	Protein of unknown function
AGROCRI.1P.001902.1	1P.scaffold-7685	497	1739	Protein of unknown function
AGROCRI.1P.001903.1	1P.scaffold-957	1033	1932	Thymidylate synthase
AGROCRI.1P.001904.1	1P.scaffold-957	4185	5084	Thymidylate synthase
AGROCRI.1P.001905.1	1P.scaffold-3332	532	699	Protein of unknown function
AGROCRI.1P.001906.1	1P.scaffold-3332	792	1253	Protein of unknown function
AGROCRI.1P.001907.1	1P.scaffold-17780	498	1221	Protein of unknown function
AGROCRI.1P.001908.1	1P.scaffold-11181	533	1270	Protein of unknown function
AGROCRI.1P.001909.1	1P.scaffold-2513	170	859	Protein of unknown function
AGROCRI.1P.001910.1	1P.scaffold-917	4427	6727	Protein of unknown function
AGROCRI.1P.001911.1	1P.scaffold-1876	3664	4053	Protein of unknown function
AGROCRI.1P.001912.1	1P.scaffold-1876	4176	4400	Protein of unknown function
AGROCRI.1P.001913.1	1P.scaffold-6743	331	1968	Protein of unknown function
AGROCRI.1P.001914.1	1P.scaffold-681	10354	15069	Protein of unknown function
AGROCRI.1P.001915.1	1P.scaffold-681	21863	23710	Transcription regulatory protein SNF2
AGROCRI.1P.001916.1	1P.scaffold-2987	1159	1925	Peptide-N(4)-(N-acetyl-beta-glucosaminyl)asparagine amidase
AGROCRI.1P.001917.1	1P.scaffold-8184	722	2123	Protein of unknown function
AGROCRI.1P.001918.1	1P.scaffold-34285	8265	8519	Protein of unknown function
AGROCRI.1P.001919.1	1P.scaffold-34285	11748	11903	Protein of unknown function
AGROCRI.1P.001920.1	1P.scaffold-1070	29	3187	Protein of unknown function
AGROCRI.1P.001921.1	1P.scaffold-11417	11064	15312	Protein of unknown function
AGROCRI.1P.001922.1	1P.scaffold-33059	396	2945	Protein of unknown function
AGROCRI.1P.001923.1	1P.scaffold-325	270	1658	Protein of unknown function
AGROCRI.1P.001924.1	1P.scaffold-41809	2	656	Polyamine oxidase 5
AGROCRI.1P.001925.1	1P.scaffold-4542	414	1972	Protein of unknown function
AGROCRI.1P.001926.1	1P.scaffold-15316	1938	3268	Protein of unknown function
AGROCRI.1P.001927.1	1P.scaffold-25836	3	1197	Protein of unknown function
AGROCRI.1P.001928.1	1P.scaffold-3462	13341	14660	Protein of unknown function
AGROCRI.1P.001929.1	1P.scaffold-4477	1332	1679	Protein of unknown function
AGROCRI.1P.001930.1	1P.scaffold-4477	1729	2109	Protein of unknown function
AGROCRI.1P.001931.1	1P.scaffold-4286	882	1394	Protein of unknown function
AGROCRI.1P.001932.1	1P.scaffold-3770	137	2852	6-phospho-beta-glucosidase GmuD
AGROCRI.1P.001933.1	1P.scaffold-841	18111	20248	Protein of unknown function
AGROCRI.1P.001934.1	1P.scaffold-609	1213	3604	Protein of unknown function
AGROCRI.1P.001935.1	1P.scaffold-980	2586	5411	Phosphomethylpyrimidine synthase
AGROCRI.1P.001936.1	1P.scaffold-402	1098	3159	Protein of unknown function
AGROCRI.1P.001937.1	1P.scaffold-40761	2972	4769	Protein of unknown function
AGROCRI.1P.001938.1	1P.scaffold-1621	1338	1634	Protein of unknown function
AGROCRI.1P.001939.1	1P.scaffold-1621	3458	3931	Protein of unknown function
AGROCRI.1P.001940.1	1P.scaffold-390	3120	4268	Protein of unknown function
AGROCRI.1P.001941.1	1P.scaffold-549	4439	8847	Protein of unknown function
AGROCRI.1P.001942.1	1P.scaffold-1051	719	2620	Protein of unknown function
AGROCRI.1P.001943.1	1P.scaffold-1051	4593	5078	Protein of unknown function
AGROCRI.1P.001944.1	1P.scaffold-10614	593	1687	Probable inactive ATP-dependent zinc metalloprotease FTSHI 3
AGROCRI.1P.001945.1	1P.scaffold-9558	100	1185	DNA-directed RNA polymerase III subunit RPC2
AGROCRI.1P.001946.1	1P.scaffold-9558	3706	5336	Protein of unknown function
AGROCRI.1P.001947.1	1P.scaffold-12809	5466	11037	Protein of unknown function
AGROCRI.1P.001948.1	1P.scaffold-1246	5267	7802	Protein of unknown function
AGROCRI.1P.001949.1	1P.scaffold-2070	197	1129	Protein SOF1
AGROCRI.1P.001950.1	1P.scaffold-2070	1621	2223	Protein sof1
AGROCRI.1P.001951.1	1P.scaffold-5029	273	1328	Protein of unknown function
AGROCRI.1P.001952.1	1P.scaffold-755	29	2455	Protein of unknown function
AGROCRI.1P.001953.1	1P.scaffold-755	15761	18634	Protein of unknown function
AGROCRI.1P.001954.1	1P.scaffold-41510	20	1358	Protein of unknown function
AGROCRI.1P.001955.1	1P.scaffold-6094	5981	6677	Protein of unknown function
AGROCRI.1P.001956.1	1P.scaffold-1090	95	2674	Protein of unknown function
AGROCRI.1P.001957.1	1P.scaffold-4349	2136	3839	ATP-dependent RNA helicase HAS1
AGROCRI.1P.001958.1	1P.scaffold-4349	4098	6737	Protein of unknown function
AGROCRI.1P.001959.1	1P.scaffold-22264	3	1026	Protein of unknown function
AGROCRI.1P.001960.1	1P.scaffold-1645	2730	6617	Protein of unknown function
AGROCRI.1P.001961.1	1P.scaffold-1304	5013	6041	Protein of unknown function
AGROCRI.1P.001962.1	1P.scaffold-1795	2669	3574	Protein of unknown function
AGROCRI.1P.001963.1	1P.scaffold-1795	3769	6948	Protein of unknown function
AGROCRI.1P.001964.1	1P.scaffold-4268	1007	3744	Protein of unknown function
AGROCRI.1P.001965.1	1P.scaffold-7895	794	2529	Protein of unknown function
AGROCRI.1P.001966.1	1P.scaffold-10548	494	1063	Ubiquitin-conjugating enzyme E2 5
AGROCRI.1P.001967.1	1P.scaffold-10548	3883	5436	Protein of unknown function
AGROCRI.1P.001968.1	1P.scaffold-2003	518	1330	Protein of unknown function
AGROCRI.1P.001969.1	1P.scaffold-10199	114	890	Formin-like protein 3
AGROCRI.1P.001970.1	1P.scaffold-1244	737	1270	Protein of unknown function
AGROCRI.1P.001971.1	1P.scaffold-1244	2836	3609	Protein of unknown function
AGROCRI.1P.001972.1	1P.scaffold-15	10539	10886	Protein of unknown function
AGROCRI.1P.001973.1	1P.scaffold-15	12035	12508	Protein of unknown function
AGROCRI.1P.001974.1	1P.scaffold-10730	26	679	Protein MSP1
AGROCRI.1P.001975.1	1P.scaffold-10730	1058	1737	Protein MSP1
AGROCRI.1P.001976.1	1P.scaffold-1	7230	9905	Protein of unknown function
AGROCRI.1P.001977.1	1P.scaffold-1	20773	22473	DNA mismatch repair protein MutS
AGROCRI.1P.001978.1	1P.scaffold-1577	2248	3844	Protein of unknown function
AGROCRI.1P.001979.1	1P.scaffold-7561	26	1531	Protein of unknown function
AGROCRI.1P.001980.1	1P.scaffold-1270	1370	5339	Fimbrin
AGROCRI.1P.001981.1	1P.scaffold-2331	1	1179	Protein of unknown function
AGROCRI.1P.001982.1	1P.scaffold-2331	5833	7074	Protein of unknown function
AGROCRI.1P.001983.1	1P.scaffold-12713	52	1378	Protein of unknown function
AGROCRI.1P.001984.1	1P.scaffold-1115	1160	2128	Protein of unknown function
AGROCRI.1P.001985.1	1P.scaffold-1115	4975	6033	Protein of unknown function
AGROCRI.1P.001986.1	1P.scaffold-931	91	1143	Eukaryotic translation initiation factor 3 subunit I
AGROCRI.1P.001987.1	1P.scaffold-931	2188	4626	DNA repair protein RAD16
AGROCRI.1P.001988.1	1P.scaffold-1259	198	1921	Protein of unknown function
AGROCRI.1P.001989.1	1P.scaffold-843	4022	6124	Heat shock protein 90 homolog
AGROCRI.1P.001990.1	1P.scaffold-843	7658	8845	Protein of unknown function
AGROCRI.1P.001991.1	1P.scaffold-2111	7850	12313	Protein of unknown function
AGROCRI.1P.001992.1	1P.scaffold-727	148	1856	Protein of unknown function
AGROCRI.1P.001993.1	1P.scaffold-1939	58	2028	Protein of unknown function
AGROCRI.1P.001994.1	1P.scaffold-23783	4	766	Protein of unknown function
AGROCRI.1P.001995.1	1P.scaffold-3977	1575	3512	Protein of unknown function
AGROCRI.1P.001996.1	1P.scaffold-41390	11255	12304	Protein of unknown function
AGROCRI.1P.001997.1	1P.scaffold-41390	16531	17580	Protein of unknown function
AGROCRI.1P.001998.1	1P.scaffold-9354	244	1371	Protein of unknown function
[truncated: 1,309 more rows]

## Sheet: 2P
Table S3: Overview of annotated genes in the draft assemblies of Agropyron cristatum.
Chromosome position	Scaffold name	Start position	End position	Annotated genes
AGROCRI.2P.000001.1	2P.scaffold-215550	6582	26253	Protein of unknown function
AGROCRI.2P.000002.1	2P.scaffold-214893	3178	33294	Callose synthase 9
AGROCRI.2P.000003.1	2P.scaffold-2940	4044	22608	DExH-box ATP-dependent RNA helicase DExH14
AGROCRI.2P.000004.1	2P.scaffold-778	274	3984	Protein of unknown function
AGROCRI.2P.000005.1	2P.scaffold-778	5092	6718	Protein of unknown function
AGROCRI.2P.000006.1	2P.scaffold-778	8443	8928	Protein of unknown function
AGROCRI.2P.000007.1	2P.scaffold-778	9633	13214	Protein of unknown function
AGROCRI.2P.000008.1	2P.scaffold-778	14355	20065	Protein of unknown function
AGROCRI.2P.000009.1	2P.scaffold-778	21002	23704	Protein of unknown function
AGROCRI.2P.000010.1	2P.scaffold-215582	3608	5645	Protein of unknown function
AGROCRI.2P.000011.1	2P.scaffold-215582	6218	27320	Protein of unknown function
AGROCRI.2P.000012.1	2P.scaffold-172	1023	1334	Protein of unknown function
AGROCRI.2P.000013.1	2P.scaffold-172	1910	6530	Kinesin-like protein KIN-7F
AGROCRI.2P.000014.1	2P.scaffold-172	8634	13818	Protein of unknown function
AGROCRI.2P.000015.1	2P.scaffold-172	22245	26998	Protein of unknown function
AGROCRI.2P.000016.1	2P.scaffold-172	28280	31188	Protein of unknown function
AGROCRI.2P.000017.1	2P.scaffold-172	33937	34203	Protein of unknown function
AGROCRI.2P.000018.1	2P.scaffold-215303	941	3378	Protein of unknown function
AGROCRI.2P.000019.1	2P.scaffold-215303	4811	17359	Protein of unknown function
AGROCRI.2P.000020.1	2P.scaffold-215134	417	19351	Callose synthase 3
AGROCRI.2P.000021.1	2P.scaffold-3091	572	5581	Protein of unknown function
AGROCRI.2P.000022.1	2P.scaffold-3091	6953	16699	Protein of unknown function
AGROCRI.2P.000023.1	2P.scaffold-72555	604	9248	Protein of unknown function
AGROCRI.2P.000024.1	2P.scaffold-72555	10343	15223	Protein of unknown function
AGROCRI.2P.000025.1	2P.scaffold-8771	136	7171	RNA cytidine acetyltransferase 1
AGROCRI.2P.000026.1	2P.scaffold-8771	7608	10997	Protein of unknown function
AGROCRI.2P.000027.1	2P.scaffold-8771	11440	14987	Aminotransferase ALD1 homolog
AGROCRI.2P.000028.1	2P.scaffold-3	925	1035	Protein of unknown function
AGROCRI.2P.000029.1	2P.scaffold-3	1277	1884	Protein of unknown function
AGROCRI.2P.000030.1	2P.scaffold-3	3031	15412	Brefeldin A-inhibited guanine nucleotide-exchange protein 5
AGROCRI.2P.000031.1	2P.scaffold-3449	2700	16078	Protein of unknown function
AGROCRI.2P.000032.1	2P.scaffold-8382	2170	3285	Protein of unknown function
AGROCRI.2P.000033.1	2P.scaffold-8382	20985	21616	Protein of unknown function
AGROCRI.2P.000034.1	2P.scaffold-8382	23060	26530	Protein of unknown function
AGROCRI.2P.000035.1	2P.scaffold-8382	27367	33828	Protein of unknown function
AGROCRI.2P.000036.1	2P.scaffold-2934	4105	17748	Regulator of nonsense transcripts 1 homolog
AGROCRI.2P.000037.1	2P.scaffold-7456	2201	12864	Protein of unknown function
AGROCRI.2P.000038.1	2P.scaffold-7456	16594	21979	Protein of unknown function
AGROCRI.2P.000039.1	2P.scaffold-10024	281	10889	Protein of unknown function
AGROCRI.2P.000040.1	2P.scaffold-10024	14810	16372	Protein of unknown function
AGROCRI.2P.000041.1	2P.scaffold-3048	3161	13052	Protein of unknown function
AGROCRI.2P.000042.1	2P.scaffold-3829	6027	15333	Transportin-1
AGROCRI.2P.000043.1	2P.scaffold-58538	1623	12782	Protein of unknown function
AGROCRI.2P.000044.1	2P.scaffold-21154	964	4790	Protein of unknown function
AGROCRI.2P.000045.1	2P.scaffold-21154	5706	13626	Protein of unknown function
AGROCRI.2P.000046.1	2P.scaffold-12016	1123	4682	Protein of unknown function
AGROCRI.2P.000047.1	2P.scaffold-12016	5755	14060	Protein of unknown function
AGROCRI.2P.000048.1	2P.scaffold-3701	3	2047	Protein of unknown function
AGROCRI.2P.000049.1	2P.scaffold-3701	6427	11185	DNA polymerase delta catalytic subunit
AGROCRI.2P.000050.1	2P.scaffold-3701	12687	14054	Protein of unknown function
AGROCRI.2P.000051.1	2P.scaffold-3701	14521	14844	Protein of unknown function
AGROCRI.2P.000052.1	2P.scaffold-3701	15143	16888	Protein of unknown function
AGROCRI.2P.000053.1	2P.scaffold-9639	9	3812	Protein of unknown function
AGROCRI.2P.000054.1	2P.scaffold-9639	7425	11835	Protein of unknown function
AGROCRI.2P.000055.1	2P.scaffold-9639	12779	13195	Protein of unknown function
AGROCRI.2P.000056.1	2P.scaffold-9639	14258	17711	Protein of unknown function
AGROCRI.2P.000057.1	2P.scaffold-3155	35	3868	Sucrose synthase 7
AGROCRI.2P.000058.1	2P.scaffold-3155	5136	9008	Protein of unknown function
AGROCRI.2P.000059.1	2P.scaffold-2967	4222	17586	Protein of unknown function
AGROCRI.2P.000060.1	2P.scaffold-7026	382	7074	Protein of unknown function
AGROCRI.2P.000061.1	2P.scaffold-7026	7251	7526	Protein of unknown function
AGROCRI.2P.000062.1	2P.scaffold-7026	7598	9988	Protein of unknown function
AGROCRI.2P.000063.1	2P.scaffold-7026	10937	14354	Protein of unknown function
AGROCRI.2P.000064.1	2P.scaffold-7026	15692	17985	Protein of unknown function
AGROCRI.2P.000065.1	2P.scaffold-7026	15939	17862	Protein of unknown function
AGROCRI.2P.000066.1	2P.scaffold-2949	3936	15505	ABC transporter C family member 2
AGROCRI.2P.000067.1	2P.scaffold-11745	861	4571	Protein of unknown function
AGROCRI.2P.000068.1	2P.scaffold-11745	5704	10755	Protein of unknown function
AGROCRI.2P.000069.1	2P.scaffold-21989	1085	4728	Formin-like protein 3
AGROCRI.2P.000070.1	2P.scaffold-21989	6265	9608	Protein of unknown function
AGROCRI.2P.000071.1	2P.scaffold-21989	10563	14524	Protein of unknown function
AGROCRI.2P.000072.1	2P.scaffold-215572	987	15839	Protein FORGETTER 1
AGROCRI.2P.000073.1	2P.scaffold-4350	108	8365	Calcium-transporting ATPase 5
AGROCRI.2P.000074.1	2P.scaffold-2936	416	19515	Protein PIR
AGROCRI.2P.000075.1	2P.scaffold-215684	1244	13215	Protein of unknown function
AGROCRI.2P.000076.1	2P.scaffold-25263	4081	6222	Protein of unknown function
AGROCRI.2P.000077.1	2P.scaffold-25263	10787	18339	Protein of unknown function
AGROCRI.2P.000078.1	2P.scaffold-2937	11779	12015	Protein of unknown function
AGROCRI.2P.000079.1	2P.scaffold-2937	12426	20164	Protein of unknown function
AGROCRI.2P.000080.1	2P.scaffold-9282	946	8643	Protein of unknown function
AGROCRI.2P.000081.1	2P.scaffold-9282	10086	11689	Protein of unknown function
AGROCRI.2P.000082.1	2P.scaffold-3097	458	8871	Kinesin-like protein KIN-4C
AGROCRI.2P.000083.1	2P.scaffold-66893	4402	9284	Protein of unknown function
AGROCRI.2P.000084.1	2P.scaffold-66893	11649	15529	Protein of unknown function
AGROCRI.2P.000085.1	2P.scaffold-66893	15684	19814	Protein of unknown function
AGROCRI.2P.000086.1	2P.scaffold-215210	2092	6715	Polyadenylate-binding protein 2
AGROCRI.2P.000087.1	2P.scaffold-215210	7764	10924	Protein of unknown function
AGROCRI.2P.000088.1	2P.scaffold-215210	11155	15550	Protein of unknown function
AGROCRI.2P.000089.1	2P.scaffold-215036	3581	12478	Protein of unknown function
AGROCRI.2P.000090.1	2P.scaffold-293	343	12173	Protein of unknown function
AGROCRI.2P.000091.1	2P.scaffold-10099	3090	4964	Protein of unknown function
AGROCRI.2P.000092.1	2P.scaffold-10099	10970	19234	Protein of unknown function
AGROCRI.2P.000093.1	2P.scaffold-214535	906	1706	Protein of unknown function
AGROCRI.2P.000094.1	2P.scaffold-214535	2485	3123	Protein NOI4
AGROCRI.2P.000095.1	2P.scaffold-214535	3938	12166	Protein of unknown function
AGROCRI.2P.000096.1	2P.scaffold-4610	6154	12667	Protein of unknown function
AGROCRI.2P.000097.1	2P.scaffold-4610	13705	13974	Protein of unknown function
AGROCRI.2P.000098.1	2P.scaffold-7081	1169	1738	Putative ripening-related protein 5
AGROCRI.2P.000099.1	2P.scaffold-7081	1979	3464	Protein of unknown function
AGROCRI.2P.000100.1	2P.scaffold-7081	4480	7064	Protein of unknown function
AGROCRI.2P.000101.1	2P.scaffold-7081	9113	9532	Protein of unknown function
AGROCRI.2P.000102.1	2P.scaffold-7081	10263	14465	Protein of unknown function
AGROCRI.2P.000103.1	2P.scaffold-22309	1822	4552	Protein of unknown function
AGROCRI.2P.000104.1	2P.scaffold-22309	5467	14545	Protein of unknown function
AGROCRI.2P.000105.1	2P.scaffold-2931	4450	14443	1
AGROCRI.2P.000106.1	2P.scaffold-2931	16764	17961	Protein of unknown function
AGROCRI.2P.000107.1	2P.scaffold-2992	2417	11885	Protein of unknown function
AGROCRI.2P.000108.1	2P.scaffold-215792	2588	6008	Probable alpha-amylase 2
AGROCRI.2P.000109.1	2P.scaffold-215792	6916	12208	Protein of unknown function
AGROCRI.2P.000110.1	2P.scaffold-215792	18825	19217	Protein of unknown function
AGROCRI.2P.000111.1	2P.scaffold-6770	136	3491	Protein of unknown function
AGROCRI.2P.000112.1	2P.scaffold-6770	9898	16229	Protein of unknown function
AGROCRI.2P.000113.1	2P.scaffold-87403	96	2123	Serine carboxypeptidase-like 45
AGROCRI.2P.000114.1	2P.scaffold-87403	9015	11311	Protein of unknown function
AGROCRI.2P.000115.1	2P.scaffold-87403	11811	15078	Protein of unknown function
AGROCRI.2P.000116.1	2P.scaffold-3842	1179	1696	Protein of unknown function
AGROCRI.2P.000117.1	2P.scaffold-3842	14710	15334	Protein of unknown function
AGROCRI.2P.000118.1	2P.scaffold-3842	17046	20204	Protein of unknown function
AGROCRI.2P.000119.1	2P.scaffold-3842	25018	27840	Protein of unknown function
AGROCRI.2P.000120.1	2P.scaffold-67941	797	10138	Protein of unknown function
AGROCRI.2P.000121.1	2P.scaffold-67941	13384	15006	Protein of unknown function
AGROCRI.2P.000122.1	2P.scaffold-10318	4171	7325	Protein of unknown function
AGROCRI.2P.000123.1	2P.scaffold-10318	8163	14869	Protein of unknown function
AGROCRI.2P.000124.1	2P.scaffold-2991	1918	4868	Protein of unknown function
AGROCRI.2P.000125.1	2P.scaffold-2991	5784	14505	Protein of unknown function
AGROCRI.2P.000126.1	2P.scaffold-2991	27464	27982	Protein of unknown function
AGROCRI.2P.000127.1	2P.scaffold-0	1483	2515	Nascent polypeptide-associated complex subunit alpha-like protein 2
AGROCRI.2P.000128.1	2P.scaffold-0	3194	13466	Endoribonuclease Dicer homolog 1
AGROCRI.2P.000129.1	2P.scaffold-1003	1	8744	Pre-mRNA-splicing factor ATP-dependent RNA helicase DEAH1
AGROCRI.2P.000130.1	2P.scaffold-43634	2452	2865	Protein of unknown function
AGROCRI.2P.000131.1	2P.scaffold-43634	3412	3991	Protein of unknown function
AGROCRI.2P.000132.1	2P.scaffold-43634	8774	14051	Protein of unknown function
AGROCRI.2P.000133.1	2P.scaffold-43634	14806	16791	Protein of unknown function
AGROCRI.2P.000134.1	2P.scaffold-111280	1961	5403	Protein of unknown function
AGROCRI.2P.000135.1	2P.scaffold-111280	7786	13807	Protein of unknown function
AGROCRI.2P.000136.1	2P.scaffold-163394	1961	5333	Protein of unknown function
AGROCRI.2P.000137.1	2P.scaffold-163394	7755	13771	Protein of unknown function
AGROCRI.2P.000138.1	2P.scaffold-208	39	2782	Homocysteine S-methyltransferase 1
AGROCRI.2P.000139.1	2P.scaffold-208	5947	15678	Protein of unknown function
AGROCRI.2P.000140.1	2P.scaffold-3470	3	3250	Protein of unknown function
AGROCRI.2P.000141.1	2P.scaffold-3470	3762	8559	Protein of unknown function
AGROCRI.2P.000142.1	2P.scaffold-3470	11389	13926	Succinate dehydrogenase [ubiquinone] flavoprotein subunit
AGROCRI.2P.000143.1	2P.scaffold-214399	2619	4575	Protein of unknown function
AGROCRI.2P.000144.1	2P.scaffold-214399	7227	9095	Protein of unknown function
AGROCRI.2P.000145.1	2P.scaffold-214399	9348	11579	Formyltetrahydrofolate deformylase 2
AGROCRI.2P.000146.1	2P.scaffold-80406	9157	14069	Protein of unknown function
AGROCRI.2P.000147.1	2P.scaffold-80406	14659	20024	Protein of unknown function
AGROCRI.2P.000148.1	2P.scaffold-80406	20144	21474	Protein of unknown function
AGROCRI.2P.000149.1	2P.scaffold-2055	13260	22518	Protein of unknown function
AGROCRI.2P.000150.1	2P.scaffold-2055	23469	24933	Protein of unknown function
AGROCRI.2P.000151.1	2P.scaffold-3711	700	7645	Ubiquitin carboxyl-terminal hydrolase 13
AGROCRI.2P.000152.1	2P.scaffold-2990	3536	6685	Mitochondrial outer membrane protein porin 5
AGROCRI.2P.000153.1	2P.scaffold-2990	8334	13101	Protein of unknown function
AGROCRI.2P.000154.1	2P.scaffold-2990	15094	17580	Protein of unknown function
AGROCRI.2P.000155.1	2P.scaffold-2990	19476	19772	Protein of unknown function
AGROCRI.2P.000156.1	2P.scaffold-5508	2661	11324	Beta-glucuronosyltransferase GlcAT14A
AGROCRI.2P.000157.1	2P.scaffold-5508	11836	15408	Protein of unknown function
AGROCRI.2P.000158.1	2P.scaffold-3238	5708	10173	Protein of unknown function
AGROCRI.2P.000159.1	2P.scaffold-3238	13429	15624	Homeobox-leucine zipper protein ROC1
AGROCRI.2P.000160.1	2P.scaffold-6121	10804	12160	Protein of unknown function
AGROCRI.2P.000161.1	2P.scaffold-6121	13219	19687	Protein of unknown function
AGROCRI.2P.000162.1	2P.scaffold-6121	22467	23693	Protein of unknown function
AGROCRI.2P.000163.1	2P.scaffold-2995	155	3147	Protein of unknown function
AGROCRI.2P.000164.1	2P.scaffold-2995	4130	11419	Protein of unknown function
AGROCRI.2P.000165.1	2P.scaffold-7660	1613	4860	Protein of unknown function
AGROCRI.2P.000166.1	2P.scaffold-7660	5813	9791	Protein of unknown function
AGROCRI.2P.000167.1	2P.scaffold-104716	1249	2487	Protein of unknown function
AGROCRI.2P.000168.1	2P.scaffold-104716	3565	11479	Protein of unknown function
AGROCRI.2P.000169.1	2P.scaffold-3532	1481	4462	Protein of unknown function
AGROCRI.2P.000170.1	2P.scaffold-3532	7026	8605	Protein of unknown function
AGROCRI.2P.000171.1	2P.scaffold-3532	13012	18972	Pre-mRNA-splicing factor ATP-dependent RNA helicase DEAH7
AGROCRI.2P.000172.1	2P.scaffold-78402	5164	5850	Protein of unknown function
AGROCRI.2P.000173.1	2P.scaffold-78402	7778	15327	Protein of unknown function
AGROCRI.2P.000174.1	2P.scaffold-4906	299	2216	Protein of unknown function
AGROCRI.2P.000175.1	2P.scaffold-4906	4784	9644	Protein of unknown function
AGROCRI.2P.000176.1	2P.scaffold-2240	960	3988	Protein of unknown function
AGROCRI.2P.000177.1	2P.scaffold-2240	5297	12991	Protein of unknown function
AGROCRI.2P.000178.1	2P.scaffold-40050	575	3193	Protein of unknown function
AGROCRI.2P.000179.1	2P.scaffold-40050	3870	10993	Protein of unknown function
AGROCRI.2P.000180.1	2P.scaffold-3214	243	8670	Protein of unknown function
AGROCRI.2P.000181.1	2P.scaffold-3214	9178	12152	Protein of unknown function
AGROCRI.2P.000182.1	2P.scaffold-3214	13274	13555	Protein of unknown function
AGROCRI.2P.000183.1	2P.scaffold-2468	351	638	Protein of unknown function
AGROCRI.2P.000184.1	2P.scaffold-2468	2854	9995	Protein of unknown function
AGROCRI.2P.000185.1	2P.scaffold-11184	1333	4726	Protein of unknown function
AGROCRI.2P.000186.1	2P.scaffold-11184	6259	7648	Protein of unknown function
AGROCRI.2P.000187.1	2P.scaffold-11184	10010	11435	Protein of unknown function
AGROCRI.2P.000188.1	2P.scaffold-11184	11475	12513	Protein of unknown function
AGROCRI.2P.000189.1	2P.scaffold-215630	2182	9957	Villin-4
AGROCRI.2P.000190.1	2P.scaffold-4747	3293	4396	Protein of unknown function
AGROCRI.2P.000191.1	2P.scaffold-4747	6806	15157	Protein of unknown function
AGROCRI.2P.000192.1	2P.scaffold-4747	16076	19292	Protein of unknown function
AGROCRI.2P.000193.1	2P.scaffold-5805	1211	2311	Protein of unknown function
AGROCRI.2P.000194.1	2P.scaffold-5805	9340	13931	Protein of unknown function
AGROCRI.2P.000195.1	2P.scaffold-5805	15419	16558	Protein of unknown function
AGROCRI.2P.000196.1	2P.scaffold-3054	1	6748	Protein of unknown function
AGROCRI.2P.000197.1	2P.scaffold-3419	234	5742	Phosphoglucan phosphatase DSP4
AGROCRI.2P.000198.1	2P.scaffold-3419	7160	7552	Protein of unknown function
AGROCRI.2P.000199.1	2P.scaffold-3419	9075	9951	Protein of unknown function
AGROCRI.2P.000200.1	2P.scaffold-3419	13092	14090	Protein of unknown function
AGROCRI.2P.000201.1	2P.scaffold-53718	194	1241	Protein of unknown function
AGROCRI.2P.000202.1	2P.scaffold-53718	3504	8994	Protein of unknown function
AGROCRI.2P.000203.1	2P.scaffold-214686	6684	10925	Protein of unknown function
AGROCRI.2P.000204.1	2P.scaffold-214686	11937	19257	Protein of unknown function
AGROCRI.2P.000205.1	2P.scaffold-1128	1289	3281	Small nuclear ribonucleoprotein SmD3b
AGROCRI.2P.000206.1	2P.scaffold-1128	10169	14336	Protein of unknown function
AGROCRI.2P.000207.1	2P.scaffold-115869	8605	10600	Protein of unknown function
AGROCRI.2P.000208.1	2P.scaffold-115869	11458	14867	Protein of unknown function
AGROCRI.2P.000209.1	2P.scaffold-115869	22394	23281	Protein of unknown function
AGROCRI.2P.000210.1	2P.scaffold-4424	426	3412	Protein of unknown function
AGROCRI.2P.000211.1	2P.scaffold-4424	3980	4954	Protein of unknown function
AGROCRI.2P.000212.1	2P.scaffold-4424	5723	15580	Cysteine synthase
AGROCRI.2P.000213.1	2P.scaffold-4	457	9383	Protein of unknown function
AGROCRI.2P.000214.1	2P.scaffold-3255	2	3046	Protein of unknown function
AGROCRI.2P.000215.1	2P.scaffold-3255	4145	7064	Protein of unknown function
AGROCRI.2P.000216.1	2P.scaffold-3255	7618	8621	Protein of unknown function
AGROCRI.2P.000217.1	2P.scaffold-35008	1160	8771	Protein of unknown function
AGROCRI.2P.000218.1	2P.scaffold-106127	5164	5850	Protein of unknown function
AGROCRI.2P.000219.1	2P.scaffold-106127	7778	13859	Protein of unknown function
AGROCRI.2P.000220.1	2P.scaffold-215556	3367	6270	Protein of unknown function
AGROCRI.2P.000221.1	2P.scaffold-215556	6778	8857	Protein of unknown function
AGROCRI.2P.000222.1	2P.scaffold-215556	9651	14006	Protein of unknown function
AGROCRI.2P.000223.1	2P.scaffold-20995	720	4488	Protein of unknown function
AGROCRI.2P.000224.1	2P.scaffold-20995	5211	12657	Protein of unknown function
AGROCRI.2P.000225.1	2P.scaffold-4869	7605	12125	Protein of unknown function
AGROCRI.2P.000226.1	2P.scaffold-4869	12905	16514	Protein of unknown function
AGROCRI.2P.000227.1	2P.scaffold-8859	10447	12735	Protein of unknown function
AGROCRI.2P.000228.1	2P.scaffold-8859	13993	15491	Protein of unknown function
AGROCRI.2P.000229.1	2P.scaffold-8859	27427	30881	Protein of unknown function
AGROCRI.2P.000230.1	2P.scaffold-96831	168	869	Protein of unknown function
AGROCRI.2P.000231.1	2P.scaffold-96831	8414	17675	Protein of unknown function
AGROCRI.2P.000232.1	2P.scaffold-215319	3041	9391	Protein of unknown function
AGROCRI.2P.000233.1	2P.scaffold-215319	10557	13603	Protein of unknown function
AGROCRI.2P.000234.1	2P.scaffold-13165	2219	3083	Protein of unknown function
AGROCRI.2P.000235.1	2P.scaffold-13165	3807	4364	Protein of unknown function
AGROCRI.2P.000236.1	2P.scaffold-13165	5805	8986	Protein of unknown function
AGROCRI.2P.000237.1	2P.scaffold-13165	9503	9883	Pollen allergen Phl p 1
AGROCRI.2P.000238.1	2P.scaffold-13165	15893	17790	Protein of unknown function
AGROCRI.2P.000239.1	2P.scaffold-3009	2310	6486	Protein of unknown function
AGROCRI.2P.000240.1	2P.scaffold-3009	7766	10674	Protein of unknown function
AGROCRI.2P.000241.1	2P.scaffold-3009	10711	13252	Protein of unknown function
AGROCRI.2P.000242.1	2P.scaffold-3009	13365	15242	Protein of unknown function
AGROCRI.2P.000243.1	2P.scaffold-3016	1223	2691	Protein of unknown function
AGROCRI.2P.000244.1	2P.scaffold-3016	5014	8546	EH domain-containing protein 1
AGROCRI.2P.000245.1	2P.scaffold-214708	10112	19172	Protein of unknown function
AGROCRI.2P.000246.1	2P.scaffold-2688	12035	12668	Protein of unknown function
AGROCRI.2P.000247.1	2P.scaffold-2688	14086	17560	Protein of unknown function
AGROCRI.2P.000248.1	2P.scaffold-2688	18400	20493	Protein of unknown function
AGROCRI.2P.000249.1	2P.scaffold-19081	293	6134	Protein of unknown function
AGROCRI.2P.000250.1	2P.scaffold-19081	10373	12433	Protein of unknown function
AGROCRI.2P.000251.1	2P.scaffold-19081	13335	13706	Protein of unknown function
AGROCRI.2P.000252.1	2P.scaffold-3012	1299	7452	Protein argonaute 1B
AGROCRI.2P.000253.1	2P.scaffold-43336	3679	14874	Importin beta-like SAD2
AGROCRI.2P.000254.1	2P.scaffold-2659	37446	40130	Protein of unknown function
AGROCRI.2P.000255.1	2P.scaffold-2659	43840	52417	Protein of unknown function
AGROCRI.2P.000256.1	2P.scaffold-11338	3	7806	K(+) efflux antiporter 1
AGROCRI.2P.000257.1	2P.scaffold-118	8173	17111	Protein of unknown function
AGROCRI.2P.000258.1	2P.scaffold-3159	7487	20477	Protein of unknown function
AGROCRI.2P.000259.1	2P.scaffold-215372	7586	16916	Protein of unknown function
AGROCRI.2P.000260.1	2P.scaffold-3395	1170	9756	Protein of unknown function
AGROCRI.2P.000261.1	2P.scaffold-3395	11859	12419	Protein of unknown function
AGROCRI.2P.000262.1	2P.scaffold-86954	134	675	Protein of unknown function
AGROCRI.2P.000263.1	2P.scaffold-86954	3539	5168	Protein of unknown function
AGROCRI.2P.000264.1	2P.scaffold-86954	6072	7265	Protein of unknown function
AGROCRI.2P.000265.1	2P.scaffold-86954	6957	10968	Protein of unknown function
AGROCRI.2P.000266.1	2P.scaffold-214649	12424	15473	Protein of unknown function
AGROCRI.2P.000267.1	2P.scaffold-214649	17662	22774	Protein of unknown function
AGROCRI.2P.000268.1	2P.scaffold-215503	7142	9040	Protein of unknown function
AGROCRI.2P.000269.1	2P.scaffold-215503	12059	19052	Protein of unknown function
AGROCRI.2P.000270.1	2P.scaffold-215503	20546	21328	Protein of unknown function
AGROCRI.2P.000271.1	2P.scaffold-4064	2	4548	Vacuolar protein sorting-associated protein 41 homolog
AGROCRI.2P.000272.1	2P.scaffold-4064	5269	5718	Ubiquinone biosynthesis protein COQ4 homolog
AGROCRI.2P.000273.1	2P.scaffold-12243	662	5111	Gamma-tubulin complex component 2
AGROCRI.2P.000274.1	2P.scaffold-33915	1355	4820	Protein of unknown function
AGROCRI.2P.000275.1	2P.scaffold-33915	5498	12490	Protein of unknown function
AGROCRI.2P.000276.1	2P.scaffold-212832	1874	8751	Protein of unknown function
AGROCRI.2P.000277.1	2P.scaffold-3420	4245	9975	Pre-mRNA-processing factor 19
AGROCRI.2P.000278.1	2P.scaffold-2959	3792	13194	V-type proton ATPase subunit a3
AGROCRI.2P.000279.1	2P.scaffold-21992	18	5779	AP-2 complex subunit alpha-1
AGROCRI.2P.000280.1	2P.scaffold-2942	5572	9383	40S ribosomal protein S3a
AGROCRI.2P.000281.1	2P.scaffold-2942	14707	21203	Protein of unknown function
AGROCRI.2P.000282.1	2P.scaffold-215302	2870	7490	Protein of unknown function
AGROCRI.2P.000283.1	2P.scaffold-215302	8955	10561	Protein of unknown function
AGROCRI.2P.000284.1	2P.scaffold-215302	12740	13420	Protein of unknown function
AGROCRI.2P.000285.1	2P.scaffold-9634	2361	3992	Protein of unknown function
AGROCRI.2P.000286.1	2P.scaffold-9634	4752	5206	Protein of unknown function
AGROCRI.2P.000287.1	2P.scaffold-9634	5856	6230	Protein of unknown function
AGROCRI.2P.000288.1	2P.scaffold-9634	8266	9562	Protein of unknown function
AGROCRI.2P.000289.1	2P.scaffold-9634	11669	12412	Protein of unknown function
AGROCRI.2P.000290.1	2P.scaffold-3117	390	12137	DNA mismatch repair protein MSH1
AGROCRI.2P.000291.1	2P.scaffold-3089	1271	6488	Protein of unknown function
AGROCRI.2P.000292.1	2P.scaffold-3089	7087	9478	Protein root UVB sensitive 2
AGROCRI.2P.000293.1	2P.scaffold-3029	438	5922	Protein of unknown function
AGROCRI.2P.000294.1	2P.scaffold-3029	6417	10059	Protein of unknown function
AGROCRI.2P.000295.1	2P.scaffold-72326	550	8328	Protein of unknown function
AGROCRI.2P.000296.1	2P.scaffold-215020	821	2770	Protein of unknown function
AGROCRI.2P.000297.1	2P.scaffold-215020	3852	7770	Protein of unknown function
AGROCRI.2P.000298.1	2P.scaffold-2980	262	7368	Protein of unknown function
AGROCRI.2P.000299.1	2P.scaffold-2980	11562	11888	Protein of unknown function
AGROCRI.2P.000300.1	2P.scaffold-5982	1	8603	Protein of unknown function
AGROCRI.2P.000301.1	2P.scaffold-5982	10429	11034	Transcription factor TCP21
AGROCRI.2P.000302.1	2P.scaffold-4664	602	5599	Gamma-aminobutyrate transaminase 1
AGROCRI.2P.000303.1	2P.scaffold-3017	4668	6998	Protein of unknown function
AGROCRI.2P.000304.1	2P.scaffold-3017	7662	11137	Protein of unknown function
AGROCRI.2P.000305.1	2P.scaffold-3085	756	7444	Protein of unknown function
AGROCRI.2P.000306.1	2P.scaffold-18494	10455	11738	Protein of unknown function
AGROCRI.2P.000307.1	2P.scaffold-18494	13628	15750	Protein of unknown function
AGROCRI.2P.000308.1	2P.scaffold-18494	17032	20005	Protein of unknown function
AGROCRI.2P.000309.1	2P.scaffold-32226	2422	3712	Protein of unknown function
AGROCRI.2P.000310.1	2P.scaffold-32226	5301	9104	Protein of unknown function
AGROCRI.2P.000311.1	2P.scaffold-27328	404	4164	Protein of unknown function
AGROCRI.2P.000312.1	2P.scaffold-27328	5469	11646	Protein of unknown function
AGROCRI.2P.000313.1	2P.scaffold-1	1252	3803	Protein of unknown function
AGROCRI.2P.000314.1	2P.scaffold-1	7554	10712	Protein of unknown function
AGROCRI.2P.000315.1	2P.scaffold-1	16001	17418	Peroxygenase
AGROCRI.2P.000316.1	2P.scaffold-1	19180	22065	Protein of unknown function
AGROCRI.2P.000317.1	2P.scaffold-215076	2	2940	Putative ribosomal large subunit pseudouridine synthase SVR1
AGROCRI.2P.000318.1	2P.scaffold-215076	4705	9467	Protein of unknown function
AGROCRI.2P.000319.1	2P.scaffold-14162	5964	7879	Protein of unknown function
AGROCRI.2P.000320.1	2P.scaffold-14162	9215	14605	Pyruvate kinase 1
AGROCRI.2P.000321.1	2P.scaffold-3171	90	4379	Probable inactive beta-glucosidase 14
AGROCRI.2P.000322.1	2P.scaffold-3171	6105	7134	Uncharacterized protein At4g13200
AGROCRI.2P.000323.1	2P.scaffold-3171	9835	11482	Protein of unknown function
AGROCRI.2P.000324.1	2P.scaffold-137580	227	3799	Protein of unknown function
AGROCRI.2P.000325.1	2P.scaffold-137580	5190	7126	Nuclear/nucleolar GTPase 2
AGROCRI.2P.000326.1	2P.scaffold-16113	17898	22971	Protein of unknown function
AGROCRI.2P.000327.1	2P.scaffold-16113	25709	28216	Protein of unknown function
AGROCRI.2P.000328.1	2P.scaffold-215697	11716	18031	Protein of unknown function
AGROCRI.2P.000329.1	2P.scaffold-214560	326	7316	Protein of unknown function
AGROCRI.2P.000330.1	2P.scaffold-9736	6546	14704	Protein of unknown function
AGROCRI.2P.000331.1	2P.scaffold-3035	629	10468	Very-long-chain aldehyde decarbonylase GL1-7
AGROCRI.2P.000332.1	2P.scaffold-5635	408	7615	Protein of unknown function
AGROCRI.2P.000333.1	2P.scaffold-6212	5057	9823	K(+) efflux antiporter 5
AGROCRI.2P.000334.1	2P.scaffold-215685	1125	11933	Protein of unknown function
AGROCRI.2P.000335.1	2P.scaffold-214551	3500	9250	Probable methionine--tRNA ligase
AGROCRI.2P.000336.1	2P.scaffold-3342	253	9478	Protein of unknown function
AGROCRI.2P.000337.1	2P.scaffold-3916	6271	13161	Methylmalonate-semialdehyde dehydrogenase [acylating]
AGROCRI.2P.000338.1	2P.scaffold-2982	319	12038	Protein of unknown function
AGROCRI.2P.000339.1	2P.scaffold-28439	600	2489	Protein of unknown function
AGROCRI.2P.000340.1	2P.scaffold-28439	2514	7617	Protein of unknown function
AGROCRI.2P.000341.1	2P.scaffold-214276	3581	9221	Protein of unknown function
AGROCRI.2P.000342.1	2P.scaffold-2973	2110	12386	Ubiquitin carboxyl-terminal hydrolase 26
AGROCRI.2P.000343.1	2P.scaffold-2973	14892	17150	Protein of unknown function
AGROCRI.2P.000344.1	2P.scaffold-6668	6315	10807	Protein of unknown function
AGROCRI.2P.000345.1	2P.scaffold-6668	11517	12825	Protein of unknown function
AGROCRI.2P.000346.1	2P.scaffold-6668	15012	17120	Protein of unknown function
AGROCRI.2P.000347.1	2P.scaffold-8249	2	52	Protein of unknown function
AGROCRI.2P.000348.1	2P.scaffold-8249	155	7633	DEAD-box ATP-dependent RNA helicase 29
AGROCRI.2P.000349.1	2P.scaffold-8249	15640	16784	Protein of unknown function
AGROCRI.2P.000350.1	2P.scaffold-2976	2005	7490	SH3 domain-containing protein 3
AGROCRI.2P.000351.1	2P.scaffold-2976	8433	10165	Protein of unknown function
AGROCRI.2P.000352.1	2P.scaffold-2976	13288	13776	Protein of unknown function
AGROCRI.2P.000353.1	2P.scaffold-2997	1	7319	Protein of unknown function
AGROCRI.2P.000354.1	2P.scaffold-2997	8480	9845	Protein of unknown function
AGROCRI.2P.000355.1	2P.scaffold-174975	457	1222	Protein of unknown function
AGROCRI.2P.000356.1	2P.scaffold-174975	6127	11623	Protein of unknown function
AGROCRI.2P.000357.1	2P.scaffold-2928	2033	10376	Protein of unknown function
AGROCRI.2P.000358.1	2P.scaffold-2928	11561	11854	Protein of unknown function
AGROCRI.2P.000359.1	2P.scaffold-2928	12386	13370	Protein of unknown function
AGROCRI.2P.000360.1	2P.scaffold-215262	2214	5332	Protein of unknown function
AGROCRI.2P.000361.1	2P.scaffold-215262	7316	11838	Protein of unknown function
AGROCRI.2P.000362.1	2P.scaffold-3401	1021	4295	Potassium channel KOR2
AGROCRI.2P.000363.1	2P.scaffold-3401	4914	7891	Protein of unknown function
AGROCRI.2P.000364.1	2P.scaffold-4755	919	2646	Protein of unknown function
AGROCRI.2P.000365.1	2P.scaffold-4755	2889	7953	Putative bifunctional dihydrofolate reductase-thymidylate synthase
AGROCRI.2P.000366.1	2P.scaffold-1974	1029	6049	Serine carboxypeptidase 1
AGROCRI.2P.000367.1	2P.scaffold-1974	6857	7650	50S ribosomal protein L27
AGROCRI.2P.000368.1	2P.scaffold-28934	3436	4007	Protein of unknown function
AGROCRI.2P.000369.1	2P.scaffold-28934	4892	9909	Protein of unknown function
AGROCRI.2P.000370.1	2P.scaffold-28934	14177	14980	Protein of unknown function
AGROCRI.2P.000371.1	2P.scaffold-106977	3	1679	Protein of unknown function
AGROCRI.2P.000372.1	2P.scaffold-106977	2763	7067	Protein of unknown function
AGROCRI.2P.000373.1	2P.scaffold-4414	2213	4815	Protein of unknown function
AGROCRI.2P.000374.1	2P.scaffold-4414	5286	6648	Endonuclease 1
AGROCRI.2P.000375.1	2P.scaffold-66005	9320	16809	Synaptonemal complex protein ZEP1
AGROCRI.2P.000376.1	2P.scaffold-12433	2322	2980	Protein of unknown function
AGROCRI.2P.000377.1	2P.scaffold-12433	5180	11008	Protein of unknown function
AGROCRI.2P.000378.1	2P.scaffold-3960	363	1159	Protein of unknown function
AGROCRI.2P.000379.1	2P.scaffold-3960	1742	5326	Kinesin-like protein KIN-14N
AGROCRI.2P.000380.1	2P.scaffold-5078	2286	4760	Protein of unknown function
AGROCRI.2P.000381.1	2P.scaffold-5078	7067	11789	ABC transporter G family member 11
AGROCRI.2P.000382.1	2P.scaffold-160055	10805	13178	Protein of unknown function
AGROCRI.2P.000383.1	2P.scaffold-160055	16963	17973	Protein of unknown function
AGROCRI.2P.000384.1	2P.scaffold-160055	33717	34115	Protein of unknown function
AGROCRI.2P.000385.1	2P.scaffold-160055	34674	37510	Protein of unknown function
AGROCRI.2P.000386.1	2P.scaffold-5474	283	7710	Protein of unknown function
AGROCRI.2P.000387.1	2P.scaffold-4464	3410	9634	Protein of unknown function
AGROCRI.2P.000388.1	2P.scaffold-5284	1240	2490	Protein of unknown function
AGROCRI.2P.000389.1	2P.scaffold-5284	5980	13953	Protein of unknown function
AGROCRI.2P.000390.1	2P.scaffold-7223	364	2321	Protein of unknown function
AGROCRI.2P.000391.1	2P.scaffold-7223	4205	8363	Protein of unknown function
AGROCRI.2P.000392.1	2P.scaffold-3817	2677	6271	Probable DNA primase large subunit
AGROCRI.2P.000393.1	2P.scaffold-5675	3	2623	Isocitrate dehydrogenase [NAD] regulatory subunit 1
AGROCRI.2P.000394.1	2P.scaffold-5675	4675	8408	Pachytene checkpoint protein 2 homolog
AGROCRI.2P.000395.1	2P.scaffold-6613	726	1112	Protein of unknown function
AGROCRI.2P.000396.1	2P.scaffold-6613	3457	3897	Protein of unknown function
AGROCRI.2P.000397.1	2P.scaffold-6613	6578	11590	Probable L-ascorbate peroxidase 7
AGROCRI.2P.000398.1	2P.scaffold-3550	1139	6040	Protein of unknown function
AGROCRI.2P.000399.1	2P.scaffold-12801	83	628	Protein of unknown function
AGROCRI.2P.000400.1	2P.scaffold-12801	1348	6406	Protein of unknown function
AGROCRI.2P.000401.1	2P.scaffold-10875	4129	8579	Protein of unknown function
AGROCRI.2P.000402.1	2P.scaffold-10875	9668	20160	Protein of unknown function
AGROCRI.2P.000403.1	2P.scaffold-21956	5387	9543	Mitochondrial import inner membrane translocase subunit TIM50
AGROCRI.2P.000404.1	2P.scaffold-21956	10259	11115	Auxin-responsive protein IAA19
AGROCRI.2P.000405.1	2P.scaffold-21956	13611	15911	Protein of unknown function
AGROCRI.2P.000406.1	2P.scaffold-6944	72	420	Germin-like protein 8-9
AGROCRI.2P.000407.1	2P.scaffold-6944	1246	5547	Protein of unknown function
AGROCRI.2P.000408.1	2P.scaffold-105593	3541	7229	Protein of unknown function
AGROCRI.2P.000409.1	2P.scaffold-105593	9192	12903	Protein of unknown function
AGROCRI.2P.000410.1	2P.scaffold-6576	286	3005	Protein of unknown function
AGROCRI.2P.000411.1	2P.scaffold-6576	6082	6422	Protein of unknown function
AGROCRI.2P.000412.1	2P.scaffold-6576	6923	9765	Protein of unknown function
AGROCRI.2P.000413.1	2P.scaffold-2844	4023	12143	Endoribonuclease Dicer homolog 4
AGROCRI.2P.000414.1	2P.scaffold-456	791	14300	Protein of unknown function
AGROCRI.2P.000415.1	2P.scaffold-3436	1054	2925	Protein of unknown function
AGROCRI.2P.000416.1	2P.scaffold-3436	3856	7072	Peptidyl-prolyl cis-trans isomerase CYP65
AGROCRI.2P.000417.1	2P.scaffold-34070	743	7553	Protein of unknown function
AGROCRI.2P.000418.1	2P.scaffold-3006	2466	8120	Protein of unknown function
AGROCRI.2P.000419.1	2P.scaffold-1260	3403	8196	Protein of unknown function
AGROCRI.2P.000420.1	2P.scaffold-1260	9507	11770	Protein of unknown function
AGROCRI.2P.000421.1	2P.scaffold-2281	345	5519	Protein of unknown function
AGROCRI.2P.000422.1	2P.scaffold-2281	6478	9842	Protein of unknown function
AGROCRI.2P.000423.1	2P.scaffold-2281	10252	10806	Protein of unknown function
AGROCRI.2P.000424.1	2P.scaffold-210369	298	4253	Protein of unknown function
AGROCRI.2P.000425.1	2P.scaffold-215258	6369	9091	Protein of unknown function
AGROCRI.2P.000426.1	2P.scaffold-215258	10346	12692	Protein of unknown function
AGROCRI.2P.000427.1	2P.scaffold-214661	3008	7226	Protein of unknown function
AGROCRI.2P.000428.1	2P.scaffold-214661	7738	8878	Protein of unknown function
AGROCRI.2P.000429.1	2P.scaffold-27616	1837	5022	Protein of unknown function
AGROCRI.2P.000430.1	2P.scaffold-27616	11660	12788	Protein of unknown function
AGROCRI.2P.000431.1	2P.scaffold-40963	515	1566	Protein of unknown function
AGROCRI.2P.000432.1	2P.scaffold-40963	5868	7862	Protein of unknown function
AGROCRI.2P.000433.1	2P.scaffold-40963	10014	14938	Protein of unknown function
AGROCRI.2P.000434.1	2P.scaffold-8898	885	13431	Protein of unknown function
AGROCRI.2P.000435.1	2P.scaffold-3374	4749	9241	Putative aconitate hydratase
AGROCRI.2P.000436.1	2P.scaffold-2935	621	1299	Protein of unknown function
AGROCRI.2P.000437.1	2P.scaffold-2935	4416	7569	Protein of unknown function
AGROCRI.2P.000438.1	2P.scaffold-2935	10643	14033	Protein of unknown function
AGROCRI.2P.000439.1	2P.scaffold-3624	1442	4747	Protein of unknown function
AGROCRI.2P.000440.1	2P.scaffold-3624	5823	8349	Protein of unknown function
AGROCRI.2P.000441.1	2P.scaffold-3624	8899	12001	Protein of unknown function
AGROCRI.2P.000442.1	2P.scaffold-3092	4269	9363	Protein of unknown function
AGROCRI.2P.000443.1	2P.scaffold-3092	10241	12324	Protein of unknown function
AGROCRI.2P.000444.1	2P.scaffold-48098	389	9004	Protein of unknown function
AGROCRI.2P.000445.1	2P.scaffold-6457	936	9479	Protein of unknown function
AGROCRI.2P.000446.1	2P.scaffold-10877	498	563	Protein of unknown function
AGROCRI.2P.000447.1	2P.scaffold-10877	894	7006	Protein of unknown function
AGROCRI.2P.000448.1	2P.scaffold-3223	1302	9179	Protein of unknown function
AGROCRI.2P.000449.1	2P.scaffold-4112	493	1575	Protein MICRORCHIDIA 7
AGROCRI.2P.000450.1	2P.scaffold-4112	1641	6462	Protein of unknown function
AGROCRI.2P.000451.1	2P.scaffold-4875	2150	4106	Protein of unknown function
AGROCRI.2P.000452.1	2P.scaffold-4875	5825	8940	Protein of unknown function
AGROCRI.2P.000453.1	2P.scaffold-80914	679	1757	Protein of unknown function
AGROCRI.2P.000454.1	2P.scaffold-80914	1767	2827	Protein of unknown function
AGROCRI.2P.000455.1	2P.scaffold-80914	4744	7859	Protein of unknown function
AGROCRI.2P.000456.1	2P.scaffold-38144	165	740	Protein of unknown function
AGROCRI.2P.000457.1	2P.scaffold-38144	1396	5616	Protein of unknown function
AGROCRI.2P.000458.1	2P.scaffold-38144	7037	7976	Protein of unknown function
AGROCRI.2P.000459.1	2P.scaffold-24588	629	3939	Protein of unknown function
AGROCRI.2P.000460.1	2P.scaffold-24588	4516	8293	Protein of unknown function
AGROCRI.2P.000461.1	2P.scaffold-5064	25	5408	Protein of unknown function
AGROCRI.2P.000462.1	2P.scaffold-5064	9550	11304	Protein of unknown function
AGROCRI.2P.000463.1	2P.scaffold-3230	86	3512	Protein of unknown function
AGROCRI.2P.000464.1	2P.scaffold-3230	7996	8592	Protein of unknown function
AGROCRI.2P.000465.1	2P.scaffold-24604	1365	7273	Protein of unknown function
AGROCRI.2P.000466.1	2P.scaffold-38643	1124	2367	Protein of unknown function
AGROCRI.2P.000467.1	2P.scaffold-38643	2927	3355	Protein of unknown function
AGROCRI.2P.000468.1	2P.scaffold-38643	4743	5753	Protein of unknown function
AGROCRI.2P.000469.1	2P.scaffold-38643	10226	11634	Protein of unknown function
AGROCRI.2P.000470.1	2P.scaffold-214198	3465	5050	Protein of unknown function
AGROCRI.2P.000471.1	2P.scaffold-214198	6344	10628	General transcription and DNA repair factor IIH subunit TFB2
AGROCRI.2P.000472.1	2P.scaffold-215306	1599	4224	Protein of unknown function
AGROCRI.2P.000473.1	2P.scaffold-215306	6998	9212	Protein of unknown function
AGROCRI.2P.000474.1	2P.scaffold-215657	3348	7006	Protein of unknown function
AGROCRI.2P.000475.1	2P.scaffold-215657	7660	8040	Protein of unknown function
AGROCRI.2P.000476.1	2P.scaffold-215657	9823	11835	Protein of unknown function
AGROCRI.2P.000477.1	2P.scaffold-45040	13286	24328	Protein of unknown function
AGROCRI.2P.000478.1	2P.scaffold-214620	194	6230	Protein of unknown function
AGROCRI.2P.000479.1	2P.scaffold-19932	4524	7528	Protein of unknown function
AGROCRI.2P.000480.1	2P.scaffold-19932	8668	13543	Protein of unknown function
AGROCRI.2P.000481.1	2P.scaffold-215571	241	1477	Amidase 1
AGROCRI.2P.000482.1	2P.scaffold-215571	5366	11283	Protein of unknown function
AGROCRI.2P.000483.1	2P.scaffold-8020	1737	13228	Protein of unknown function
AGROCRI.2P.000484.1	2P.scaffold-51414	5468	12327	Protein of unknown function
AGROCRI.2P.000485.1	2P.scaffold-9538	1	6799	Protein of unknown function
AGROCRI.2P.000486.1	2P.scaffold-13055	502	11533	Protein of unknown function
AGROCRI.2P.000487.1	2P.scaffold-201870	748	7327	Protein of unknown function
AGROCRI.2P.000488.1	2P.scaffold-3073	4077	12437	Protein of unknown function
AGROCRI.2P.000489.1	2P.scaffold-57526	5664	13564	Protein of unknown function
AGROCRI.2P.000490.1	2P.scaffold-3145	1822	9167	Germin-like protein 3-1
AGROCRI.2P.000491.1	2P.scaffold-207	754	1482	Protein of unknown function
AGROCRI.2P.000492.1	2P.scaffold-207	2897	9875	Protein of unknown function
AGROCRI.2P.000493.1	2P.scaffold-215434	8744	11592	Protein of unknown function
AGROCRI.2P.000494.1	2P.scaffold-215434	18110	21138	Protein of unknown function
AGROCRI.2P.000495.1	2P.scaffold-3072	1788	7926	Protein of unknown function
AGROCRI.2P.000496.1	2P.scaffold-2947	359	1094	Protein of unknown function
AGROCRI.2P.000497.1	2P.scaffold-2947	9336	10816	Protein of unknown function
AGROCRI.2P.000498.1	2P.scaffold-2947	12940	15392	Protein of unknown function
AGROCRI.2P.000499.1	2P.scaffold-2947	17753	18961	Protein of unknown function
AGROCRI.2P.000500.1	2P.scaffold-2947	28182	29234	Protein of unknown function
AGROCRI.2P.000501.1	2P.scaffold-12432	4611	8471	Nodulation receptor kinase
AGROCRI.2P.000502.1	2P.scaffold-12432	9730	13115	Protein of unknown function
AGROCRI.2P.000503.1	2P.scaffold-2941	5962	7214	Protein of unknown function
AGROCRI.2P.000504.1	2P.scaffold-2941	14704	16759	Protein of unknown function
AGROCRI.2P.000505.1	2P.scaffold-2941	20426	27542	Protein of unknown function
AGROCRI.2P.000506.1	2P.scaffold-22697	2719	15682	Protein of unknown function
AGROCRI.2P.000507.1	2P.scaffold-1264	3666	9565	Protein of unknown function
AGROCRI.2P.000508.1	2P.scaffold-83934	2225	8203	Protein of unknown function
AGROCRI.2P.000509.1	2P.scaffold-83934	13111	17977	Protein of unknown function
AGROCRI.2P.000510.1	2P.scaffold-8404	540	1497	Protein of unknown function
AGROCRI.2P.000511.1	2P.scaffold-8404	2638	6657	Copper-transporting ATPase PAA2
AGROCRI.2P.000512.1	2P.scaffold-2972	4931	5341	Protein of unknown function
AGROCRI.2P.000513.1	2P.scaffold-2972	6485	12683	Protein of unknown function
AGROCRI.2P.000514.1	2P.scaffold-214948	992	4034	Actin-related protein 8
AGROCRI.2P.000515.1	2P.scaffold-214948	6545	8855	Ubiquitin-conjugating enzyme E2 28
AGROCRI.2P.000516.1	2P.scaffold-21026	3	245	Protein of unknown function
AGROCRI.2P.000517.1	2P.scaffold-21026	325	4382	Protein of unknown function
AGROCRI.2P.000518.1	2P.scaffold-21026	5214	6081	Protein of unknown function
AGROCRI.2P.000519.1	2P.scaffold-10567	1522	3555	Protein of unknown function
AGROCRI.2P.000520.1	2P.scaffold-10567	7589	12280	Protein of unknown function
AGROCRI.2P.000521.1	2P.scaffold-5435	938	7360	ATP-dependent DNA helicase DDM1
AGROCRI.2P.000522.1	2P.scaffold-5435	8997	9686	Peroxisomal membrane protein 11-4
AGROCRI.2P.000523.1	2P.scaffold-3138	3063	16258	Protein of unknown function
AGROCRI.2P.000524.1	2P.scaffold-6857	1	3731	Casein kinase 1-like protein HD16
AGROCRI.2P.000525.1	2P.scaffold-5862	548	1704	Protein of unknown function
AGROCRI.2P.000526.1	2P.scaffold-5862	1726	3147	Protein of unknown function
AGROCRI.2P.000527.1	2P.scaffold-5862	3272	5358	Protein of unknown function
AGROCRI.2P.000528.1	2P.scaffold-214144	4304	7565	Protein of unknown function
AGROCRI.2P.000529.1	2P.scaffold-214144	7941	9081	60S ribosomal protein L5-1
AGROCRI.2P.000530.1	2P.scaffold-214144	11133	14243	Protein of unknown function
AGROCRI.2P.000531.1	2P.scaffold-3283	212	2741	Protein of unknown function
AGROCRI.2P.000532.1	2P.scaffold-3283	3911	5911	Protein of unknown function
AGROCRI.2P.000533.1	2P.scaffold-3283	6379	7872	Protein of unknown function
AGROCRI.2P.000534.1	2P.scaffold-4132	3	1957	Nucleobase-ascorbate transporter 11
AGROCRI.2P.000535.1	2P.scaffold-4132	2512	5572	Protein of unknown function
AGROCRI.2P.000536.1	2P.scaffold-9065	5748	10484	Protein of unknown function
AGROCRI.2P.000537.1	2P.scaffold-9065	14348	15075	Probable peptidyl-tRNA hydrolase 2
AGROCRI.2P.000538.1	2P.scaffold-9065	17204	18172	Protein of unknown function
AGROCRI.2P.000539.1	2P.scaffold-12450	2	388	Protein of unknown function
AGROCRI.2P.000540.1	2P.scaffold-12450	1131	4662	Protein of unknown function
AGROCRI.2P.000541.1	2P.scaffold-3832	92	2165	Protein of unknown function
AGROCRI.2P.000542.1	2P.scaffold-3832	2805	5045	Protein of unknown function
AGROCRI.2P.000543.1	2P.scaffold-19930	663	1520	Protein of unknown function
AGROCRI.2P.000544.1	2P.scaffold-19930	1864	4430	Protein of unknown function
AGROCRI.2P.000545.1	2P.scaffold-19930	7868	9552	Protein of unknown function
AGROCRI.2P.000546.1	2P.scaffold-215379	8398	12202	Proline--tRNA ligase
AGROCRI.2P.000547.1	2P.scaffold-215379	13325	14434	Protein of unknown function
AGROCRI.2P.000548.1	2P.scaffold-3415	7133	13485	Protein of unknown function
AGROCRI.2P.000549.1	2P.scaffold-3008	11178	14702	CBL-interacting protein kinase 9
AGROCRI.2P.000550.1	2P.scaffold-215186	4979	9576	Protein of unknown function
AGROCRI.2P.000551.1	2P.scaffold-4601	812	4555	Protein of unknown function
AGROCRI.2P.000552.1	2P.scaffold-4601	11690	14767	Protein of unknown function
AGROCRI.2P.000553.1	2P.scaffold-2975	2036	8006	Peptidyl-prolyl cis-trans isomerase CYP63
AGROCRI.2P.000554.1	2P.scaffold-6550	3	3909	Microtubule-associated protein 70-4
AGROCRI.2P.000555.1	2P.scaffold-6550	6902	7970	Protein of unknown function
AGROCRI.2P.000556.1	2P.scaffold-182934	296	1570	Protein of unknown function
AGROCRI.2P.000557.1	2P.scaffold-182934	9265	10139	Protein of unknown function
AGROCRI.2P.000558.1	2P.scaffold-182934	10203	12012	Protein of unknown function
AGROCRI.2P.000559.1	2P.scaffold-182934	12281	12955	Protein of unknown function
AGROCRI.2P.000560.1	2P.scaffold-5034	4482	6213	Protein of unknown function
AGROCRI.2P.000561.1	2P.scaffold-5034	8305	10999	Protein of unknown function
AGROCRI.2P.000562.1	2P.scaffold-41966	3086	5166	Protein of unknown function
AGROCRI.2P.000563.1	2P.scaffold-41966	5547	10538	Protein of unknown function
AGROCRI.2P.000564.1	2P.scaffold-41966	11259	11504	Protein of unknown function
AGROCRI.2P.000565.1	2P.scaffold-41966	18397	19284	Protein of unknown function
AGROCRI.2P.000566.1	2P.scaffold-3654	295	1149	Protein of unknown function
AGROCRI.2P.000567.1	2P.scaffold-3654	1716	5246	Cell division control protein 48 homolog B
AGROCRI.2P.000568.1	2P.scaffold-6860	351	3831	Protein of unknown function
AGROCRI.2P.000569.1	2P.scaffold-63579	767	7123	Protein of unknown function
AGROCRI.2P.000570.1	2P.scaffold-8125	800	4759	Protein of unknown function
AGROCRI.2P.000571.1	2P.scaffold-8125	11831	14631	Protein of unknown function
AGROCRI.2P.000572.1	2P.scaffold-2971	3769	5517	Protein of unknown function
AGROCRI.2P.000573.1	2P.scaffold-2971	12567	13983	Protein of unknown function
AGROCRI.2P.000574.1	2P.scaffold-115238	168	869	Protein of unknown function
AGROCRI.2P.000575.1	2P.scaffold-115238	8414	12831	Protein of unknown function
AGROCRI.2P.000576.1	2P.scaffold-3036	3193	8078	Protein of unknown function
AGROCRI.2P.000577.1	2P.scaffold-3036	9974	12896	Protein of unknown function
AGROCRI.2P.000578.1	2P.scaffold-54691	3941	4904	Protein of unknown function
AGROCRI.2P.000579.1	2P.scaffold-54691	7192	9313	Protein of unknown function
AGROCRI.2P.000580.1	2P.scaffold-54691	12167	12472	Protein of unknown function
AGROCRI.2P.000581.1	2P.scaffold-10863	101	4287	Betaine aldehyde dehydrogenase
AGROCRI.2P.000582.1	2P.scaffold-3234	3341	8128	ABC transporter G family member 45
AGROCRI.2P.000583.1	2P.scaffold-6605	2402	3644	Protein of unknown function
AGROCRI.2P.000584.1	2P.scaffold-6605	7109	11617	Protein of unknown function
AGROCRI.2P.000585.1	2P.scaffold-3690	857	2449	Protein of unknown function
AGROCRI.2P.000586.1	2P.scaffold-3690	6557	8939	Ribosome biogenesis protein BRX1 homolog 1
AGROCRI.2P.000587.1	2P.scaffold-38019	1485	4711	Protein of unknown function
AGROCRI.2P.000588.1	2P.scaffold-38019	5297	5809	Protein of unknown function
AGROCRI.2P.000589.1	2P.scaffold-5517	59	1991	Protein of unknown function
AGROCRI.2P.000590.1	2P.scaffold-5517	6361	8735	Phosphomannomutase
AGROCRI.2P.000591.1	2P.scaffold-63	36	12534	Protein of unknown function
AGROCRI.2P.000592.1	2P.scaffold-19023	890	1228	Protein of unknown function
AGROCRI.2P.000593.1	2P.scaffold-19023	1678	2118	Protein of unknown function
AGROCRI.2P.000594.1	2P.scaffold-19023	3076	11130	Protein of unknown function
AGROCRI.2P.000595.1	2P.scaffold-215648	3657	5997	Protein of unknown function
AGROCRI.2P.000596.1	2P.scaffold-215648	6067	10007	Protein of unknown function
AGROCRI.2P.000597.1	2P.scaffold-91702	4322	9489	ABC transporter G family member 48
AGROCRI.2P.000598.1	2P.scaffold-3551	1483	3198	Protein of unknown function
AGROCRI.2P.000599.1	2P.scaffold-3551	3418	3789	Protein of unknown function
AGROCRI.2P.000600.1	2P.scaffold-3551	5435	7960	Protein of unknown function
AGROCRI.2P.000601.1	2P.scaffold-28724	976	6782	Protein of unknown function
AGROCRI.2P.000602.1	2P.scaffold-1424	626	9385	Protein of unknown function
AGROCRI.2P.000603.1	2P.scaffold-2134	12634	15238	Probable serine/threonine-protein kinase PBL3
AGROCRI.2P.000604.1	2P.scaffold-2134	15853	17688	Protein of unknown function
AGROCRI.2P.000605.1	2P.scaffold-14043	13414	17316	Protein of unknown function
AGROCRI.2P.000606.1	2P.scaffold-14043	17826	20865	Protein of unknown function
AGROCRI.2P.000607.1	2P.scaffold-215726	3558	5555	Protein of unknown function
AGROCRI.2P.000608.1	2P.scaffold-215726	6666	9498	Protein of unknown function
AGROCRI.2P.000609.1	2P.scaffold-215726	12034	13241	Protein of unknown function
AGROCRI.2P.000610.1	2P.scaffold-215683	907	3229	Protein of unknown function
AGROCRI.2P.000611.1	2P.scaffold-215683	3818	4318	Protein of unknown function
AGROCRI.2P.000612.1	2P.scaffold-215683	4659	5927	Protein of unknown function
AGROCRI.2P.000613.1	2P.scaffold-215683	6486	11719	Protein of unknown function
AGROCRI.2P.000614.1	2P.scaffold-4507	1921	10948	Heat shock protein 81-1
AGROCRI.2P.000615.1	2P.scaffold-4507	16392	17072	Protein of unknown function
AGROCRI.2P.000616.1	2P.scaffold-3614	439	6954	Protein of unknown function
AGROCRI.2P.000617.1	2P.scaffold-4181	476	1009	Protein of unknown function
AGROCRI.2P.000618.1	2P.scaffold-4181	5363	8234	Protein of unknown function
AGROCRI.2P.000619.1	2P.scaffold-116061	3271	6684	Protein of unknown function
AGROCRI.2P.000620.1	2P.scaffold-116061	7510	9284	Protein of unknown function
AGROCRI.2P.000621.1	2P.scaffold-8000	410	3540	Protein of unknown function
AGROCRI.2P.000622.1	2P.scaffold-8000	5051	9015	Protein of unknown function
AGROCRI.2P.000623.1	2P.scaffold-214986	5042	5669	Very-long-chain (3R)-3-hydroxyacyl-CoA dehydratase PASTICCINO 2B
AGROCRI.2P.000624.1	2P.scaffold-214986	6864	7821	Protein of unknown function
AGROCRI.2P.000625.1	2P.scaffold-214986	8836	10262	Probable protein phosphatase 2C 44
AGROCRI.2P.000626.1	2P.scaffold-173	36	519	Glycine--tRNA ligase
AGROCRI.2P.000627.1	2P.scaffold-173	651	1119	Glycine--tRNA ligase
AGROCRI.2P.000628.1	2P.scaffold-173	1706	5319	Glycine--tRNA ligase
AGROCRI.2P.000629.1	2P.scaffold-215235	7009	10226	Probable 5'-adenylylsulfate reductase 1
AGROCRI.2P.000630.1	2P.scaffold-215235	10981	12539	Protein of unknown function
AGROCRI.2P.000631.1	2P.scaffold-215235	12696	15548	Protein of unknown function
AGROCRI.2P.000632.1	2P.scaffold-26742	1005	1370	Protein of unknown function
AGROCRI.2P.000633.1	2P.scaffold-26742	4866	10082	Protein of unknown function
AGROCRI.2P.000634.1	2P.scaffold-214680	321	2222	Protein of unknown function
AGROCRI.2P.000635.1	2P.scaffold-214680	2929	8691	Protein of unknown function
AGROCRI.2P.000636.1	2P.scaffold-56725	340	3735	Protein of unknown function
AGROCRI.2P.000637.1	2P.scaffold-3834	1118	6486	Phospholipid-transporting ATPase 2
AGROCRI.2P.000638.1	2P.scaffold-214493	3259	7150	Protein of unknown function
AGROCRI.2P.000639.1	2P.scaffold-28331	1693	5223	Protein of unknown function
AGROCRI.2P.000640.1	2P.scaffold-28331	6545	9040	Protein of unknown function
AGROCRI.2P.000641.1	2P.scaffold-28331	9227	9751	Protein of unknown function
AGROCRI.2P.000642.1	2P.scaffold-3631	768	10802	Phospholipid-transporting ATPase 2
AGROCRI.2P.000643.1	2P.scaffold-7829	2066	7913	Ent-kaur-16-ene synthase
AGROCRI.2P.000644.1	2P.scaffold-87050	34	2882	Protein of unknown function
AGROCRI.2P.000645.1	2P.scaffold-87050	3964	6401	Protein of unknown function
AGROCRI.2P.000646.1	2P.scaffold-2994	647	2635	Protein of unknown function
AGROCRI.2P.000647.1	2P.scaffold-2994	4148	9776	Protein of unknown function
AGROCRI.2P.000648.1	2P.scaffold-3248	2802	13928	Calmodulin-binding transcription activator CBT
AGROCRI.2P.000649.1	2P.scaffold-4693	1209	5385	Protein of unknown function
AGROCRI.2P.000650.1	2P.scaffold-3931	6467	7306	Protein of unknown function
AGROCRI.2P.000651.1	2P.scaffold-3931	9126	15390	Protein of unknown function
AGROCRI.2P.000652.1	2P.scaffold-23853	898	5139	Protein of unknown function
AGROCRI.2P.000653.1	2P.scaffold-586	596	1272	Protein of unknown function
AGROCRI.2P.000654.1	2P.scaffold-586	1318	2170	Protein of unknown function
AGROCRI.2P.000655.1	2P.scaffold-586	5613	11621	Protein of unknown function
AGROCRI.2P.000656.1	2P.scaffold-3602	3	5486	Protein CHROMATIN REMODELING 19
AGROCRI.2P.000657.1	2P.scaffold-6330	4900	5634	Protein of unknown function
AGROCRI.2P.000658.1	2P.scaffold-6330	7440	13985	Protein of unknown function
AGROCRI.2P.000659.1	2P.scaffold-3051	22134	26173	Protein DETOXIFICATION 42
AGROCRI.2P.000660.1	2P.scaffold-4169	615	2881	60S ribosomal protein L5-1
AGROCRI.2P.000661.1	2P.scaffold-4169	3803	5193	Protein of unknown function
AGROCRI.2P.000662.1	2P.scaffold-7036	253	8067	Cycloartenol-C-24-methyltransferase 1
AGROCRI.2P.000663.1	2P.scaffold-3539	2258	5261	Protein of unknown function
AGROCRI.2P.000664.1	2P.scaffold-3539	9572	11899	Protein of unknown function
AGROCRI.2P.000665.1	2P.scaffold-13323	6961	9769	Protein of unknown function
AGROCRI.2P.000666.1	2P.scaffold-13323	13320	21531	Protein of unknown function
AGROCRI.2P.000667.1	2P.scaffold-15329	77	4660	Protein unc-13 homolog
AGROCRI.2P.000668.1	2P.scaffold-15329	5472	6164	Protein of unknown function
AGROCRI.2P.000669.1	2P.scaffold-44888	1015	4984	Ent-kaur-16-ene synthase
AGROCRI.2P.000670.1	2P.scaffold-4378	862	5043	COP9 signalosome complex subunit 4
AGROCRI.2P.000671.1	2P.scaffold-215637	10099	10723	Protein of unknown function
AGROCRI.2P.000672.1	2P.scaffold-215637	12366	15817	Protein of unknown function
AGROCRI.2P.000673.1	2P.scaffold-3370	1866	8291	Protein RIK
AGROCRI.2P.000674.1	2P.scaffold-1170	1892	6522	Protein of unknown function
AGROCRI.2P.000675.1	2P.scaffold-1170	3600	4115	Protein of unknown function
AGROCRI.2P.000676.1	2P.scaffold-1170	4167	4619	Protein of unknown function
AGROCRI.2P.000677.1	2P.scaffold-6072	758	4384	Protein of unknown function
AGROCRI.2P.000678.1	2P.scaffold-6072	4454	6585	Protein of unknown function
AGROCRI.2P.000679.1	2P.scaffold-4369	274	840	Protein of unknown function
AGROCRI.2P.000680.1	2P.scaffold-4369	1826	2491	Protein of unknown function
AGROCRI.2P.000681.1	2P.scaffold-4369	2685	4103	Protein of unknown function
AGROCRI.2P.000682.1	2P.scaffold-4369	5280	5606	Protein of unknown function
AGROCRI.2P.000683.1	2P.scaffold-109485	4730	7860	Granule-bound starch synthase 1b
AGROCRI.2P.000684.1	2P.scaffold-3775	1930	5766	Protein of unknown function
AGROCRI.2P.000685.1	2P.scaffold-10639	962	4891	Ent-kaur-16-ene synthase
AGROCRI.2P.000686.1	2P.scaffold-3425	474	4757	Protein RRP6-like 2
AGROCRI.2P.000687.1	2P.scaffold-3440	2653	3135	Protein of unknown function
AGROCRI.2P.000688.1	2P.scaffold-3440	7617	11791	Protein of unknown function
AGROCRI.2P.000689.1	2P.scaffold-3378	4642	8024	Protein of unknown function
AGROCRI.2P.000690.1	2P.scaffold-3378	11693	13519	Protein of unknown function
AGROCRI.2P.000691.1	2P.scaffold-28710	56	2327	Protein of unknown function
AGROCRI.2P.000692.1	2P.scaffold-28710	3061	3995	Protein of unknown function
AGROCRI.2P.000693.1	2P.scaffold-28710	8446	9667	Protein of unknown function
AGROCRI.2P.000694.1	2P.scaffold-447	813	4180	Protein of unknown function
AGROCRI.2P.000695.1	2P.scaffold-447	4515	5375	Protein of unknown function
AGROCRI.2P.000696.1	2P.scaffold-447	10052	12604	Protein of unknown function
AGROCRI.2P.000697.1	2P.scaffold-3409	3	1219	Protein of unknown function
AGROCRI.2P.000698.1	2P.scaffold-3409	1498	2028	Protein of unknown function
AGROCRI.2P.000699.1	2P.scaffold-3409	3227	4549	Protein of unknown function
AGROCRI.2P.000700.1	2P.scaffold-3409	7061	10969	Polyadenylate-binding protein RBP47B'
AGROCRI.2P.000701.1	2P.scaffold-9155	2113	5420	Protein of unknown function
AGROCRI.2P.000702.1	2P.scaffold-3547	257	1830	Protein of unknown function
AGROCRI.2P.000703.1	2P.scaffold-3547	3889	7650	Protein of unknown function
AGROCRI.2P.000704.1	2P.scaffold-27370	14235	17260	CCR4-NOT transcription complex subunit 9
AGROCRI.2P.000705.1	2P.scaffold-27370	18429	18870	40S ribosomal protein S11-3
AGROCRI.2P.000706.1	2P.scaffold-157977	1	3054	Protein of unknown function
AGROCRI.2P.000707.1	2P.scaffold-157977	3476	7808	Protein of unknown function
AGROCRI.2P.000708.1	2P.scaffold-7717	9487	15767	Protein of unknown function
AGROCRI.2P.000709.1	2P.scaffold-111132	1201	7056	Protein of unknown function
AGROCRI.2P.000710.1	2P.scaffold-4456	2	3541	Respiratory burst oxidase homolog protein B
AGROCRI.2P.000711.1	2P.scaffold-4456	4195	4884	Protein of unknown function
AGROCRI.2P.000712.1	2P.scaffold-18206	922	2320	Vacuolar protein sorting-associated protein 55 homolog
AGROCRI.2P.000713.1	2P.scaffold-18206	8501	12211	Protein of unknown function
AGROCRI.2P.000714.1	2P.scaffold-6272	1374	6910	Protein of unknown function
AGROCRI.2P.000715.1	2P.scaffold-215264	2423	8614	Protein of unknown function
AGROCRI.2P.000716.1	2P.scaffold-215603	8884	14490	Protein of unknown function
AGROCRI.2P.000717.1	2P.scaffold-10849	593	5682	Exocyst complex component SEC5B
AGROCRI.2P.000718.1	2P.scaffold-11715	1103	3194	Protein of unknown function
AGROCRI.2P.000719.1	2P.scaffold-11715	4437	11479	Protein of unknown function
AGROCRI.2P.000720.1	2P.scaffold-3066	62	3128	Protein of unknown function
AGROCRI.2P.000721.1	2P.scaffold-3066	10387	12946	Transcription factor BHLH094
AGROCRI.2P.000722.1	2P.scaffold-8914	3312	3971	Protein of unknown function
AGROCRI.2P.000723.1	2P.scaffold-8914	4674	6647	Protein of unknown function
AGROCRI.2P.000724.1	2P.scaffold-214487	2918	3688	Protein of unknown function
AGROCRI.2P.000725.1	2P.scaffold-214487	4305	11101	Protein of unknown function
AGROCRI.2P.000726.1	2P.scaffold-39958	269	6145	Protein of unknown function
AGROCRI.2P.000727.1	2P.scaffold-2898	69	953	Protein of unknown function
AGROCRI.2P.000728.1	2P.scaffold-2898	3306	3761	Protein of unknown function
AGROCRI.2P.000729.1	2P.scaffold-2898	15021	15623	Protein of unknown function
AGROCRI.2P.000730.1	2P.scaffold-2898	16163	16741	Protein of unknown function
AGROCRI.2P.000731.1	2P.scaffold-20597	1351	2880	Probable phospholipid hydroperoxide glutathione peroxidase 6
AGROCRI.2P.000732.1	2P.scaffold-20597	3714	6388	Protein of unknown function
AGROCRI.2P.000733.1	2P.scaffold-5518	1153	3855	Protein of unknown function
AGROCRI.2P.000734.1	2P.scaffold-215789	676	7700	Protein of unknown function
AGROCRI.2P.000735.1	2P.scaffold-215789	17257	17556	Protein of unknown function
AGROCRI.2P.000736.1	2P.scaffold-44772	2209	3879	Protein of unknown function
AGROCRI.2P.000737.1	2P.scaffold-44772	4392	8204	Protein of unknown function
AGROCRI.2P.000738.1	2P.scaffold-4228	3770	7480	Protein of unknown function
AGROCRI.2P.000739.1	2P.scaffold-2986	3696	10355	Protein of unknown function
AGROCRI.2P.000740.1	2P.scaffold-1554	731	4700	Protein of unknown function
AGROCRI.2P.000741.1	2P.scaffold-52335	2973	7158	Probable inactive purple acid phosphatase 1
AGROCRI.2P.000742.1	2P.scaffold-2916	4	2304	Protein of unknown function
AGROCRI.2P.000743.1	2P.scaffold-2916	4188	10862	Protein of unknown function
AGROCRI.2P.000744.1	2P.scaffold-2916	26084	26519	Thioredoxin-like protein YLS8
AGROCRI.2P.000745.1	2P.scaffold-3339	2	22	Protein of unknown function
AGROCRI.2P.000746.1	2P.scaffold-3339	128	1999	Vacuolar-processing enzyme beta-isozyme 1
AGROCRI.2P.000747.1	2P.scaffold-3339	2599	5234	Protein of unknown function
AGROCRI.2P.000748.1	2P.scaffold-3390	2	1968	Protein of unknown function
AGROCRI.2P.000749.1	2P.scaffold-3390	2589	4648	Origin of replication complex subunit 2
AGROCRI.2P.000750.1	2P.scaffold-213374	508	6400	Protein of unknown function
AGROCRI.2P.000751.1	2P.scaffold-213374	7933	8653	Protein of unknown function
AGROCRI.2P.000752.1	2P.scaffold-40182	950	5584	Protein of unknown function
AGROCRI.2P.000753.1	2P.scaffold-2951	4214	8777	Protein of unknown function
AGROCRI.2P.000754.1	2P.scaffold-5821	3	4411	Protein of unknown function
AGROCRI.2P.000755.1	2P.scaffold-8	1815	7763	DNA (cytosine-5)-methyltransferase 1B
AGROCRI.2P.000756.1	2P.scaffold-17654	3151	6609	Protein of unknown function
AGROCRI.2P.000757.1	2P.scaffold-215764	2973	10740	Protein of unknown function
AGROCRI.2P.000758.1	2P.scaffold-10623	400	6188	Protein of unknown function
AGROCRI.2P.000759.1	2P.scaffold-22861	2	740	Protein of unknown function
AGROCRI.2P.000760.1	2P.scaffold-22861	5019	9745	Protein of unknown function
AGROCRI.2P.000761.1	2P.scaffold-4597	1638	7564	Protein of unknown function
AGROCRI.2P.000762.1	2P.scaffold-3309	4753	8234	Protein of unknown function
AGROCRI.2P.000763.1	2P.scaffold-215443	1610	3867	Protein of unknown function
AGROCRI.2P.000764.1	2P.scaffold-215443	6333	8187	Protein of unknown function
AGROCRI.2P.000765.1	2P.scaffold-215443	8075	8666	Protein of unknown function
AGROCRI.2P.000766.1	2P.scaffold-6675	1773	5216	Protein of unknown function
AGROCRI.2P.000767.1	2P.scaffold-215511	7463	15230	Protein of unknown function
AGROCRI.2P.000768.1	2P.scaffold-3482	400	1500	Protein of unknown function
AGROCRI.2P.000769.1	2P.scaffold-3482	3130	7654	Protein of unknown function
AGROCRI.2P.000770.1	2P.scaffold-1737	1444	2349	Protein FLOWERING LOCUS T
AGROCRI.2P.000771.1	2P.scaffold-1737	8023	11308	Protein of unknown function
AGROCRI.2P.000772.1	2P.scaffold-215497	2151	4956	Protein of unknown function
AGROCRI.2P.000773.1	2P.scaffold-215497	7120	12545	Protein of unknown function
AGROCRI.2P.000774.1	2P.scaffold-3675	1670	3998	Protein of unknown function
AGROCRI.2P.000775.1	2P.scaffold-3675	5519	6688	Protein of unknown function
AGROCRI.2P.000776.1	2P.scaffold-3675	8973	9251	Enhancer of rudimentary homolog
AGROCRI.2P.000777.1	2P.scaffold-53967	3180	7064	Ribosome-recycling factor
AGROCRI.2P.000778.1	2P.scaffold-53967	9863	10520	Protein of unknown function
AGROCRI.2P.000779.1	2P.scaffold-215364	13241	14450	ERAD-associated E3 ubiquitin-protein ligase HRD1
AGROCRI.2P.000780.1	2P.scaffold-215364	26988	30708	Protein of unknown function
AGROCRI.2P.000781.1	2P.scaffold-57218	1445	2843	Protein Brevis radix-like 2
AGROCRI.2P.000782.1	2P.scaffold-57218	6094	6468	Protein of unknown function
AGROCRI.2P.000783.1	2P.scaffold-57218	6702	8845	Protein of unknown function
AGROCRI.2P.000784.1	2P.scaffold-4042	937	5605	Protein of unknown function
AGROCRI.2P.000785.1	2P.scaffold-4042	8886	9314	Protein of unknown function
AGROCRI.2P.000786.1	2P.scaffold-4042	10699	11091	Protein of unknown function
AGROCRI.2P.000787.1	2P.scaffold-1871	22	921	Nuclear/nucleolar GTPase 2
AGROCRI.2P.000788.1	2P.scaffold-1871	2931	8090	Protein of unknown function
AGROCRI.2P.000789.1	2P.scaffold-214831	443	2938	Protein of unknown function
AGROCRI.2P.000790.1	2P.scaffold-214831	3743	5671	Protein of unknown function
AGROCRI.2P.000791.1	2P.scaffold-1687	2509	3180	Protein of unknown function
AGROCRI.2P.000792.1	2P.scaffold-1687	4630	10334	Flavanone 3-dioxygenase 2
AGROCRI.2P.000793.1	2P.scaffold-1687	12736	13726	Protein of unknown function
AGROCRI.2P.000794.1	2P.scaffold-1687	17375	17955	Protein of unknown function
AGROCRI.2P.000795.1	2P.scaffold-40046	5995	8163	Protein of unknown function
AGROCRI.2P.000796.1	2P.scaffold-40046	10011	10940	Linoleate 9S-lipoxygenase 1
AGROCRI.2P.000797.1	2P.scaffold-40046	19424	22646	Protein of unknown function
AGROCRI.2P.000798.1	2P.scaffold-5046	14	5784	Protein of unknown function
AGROCRI.2P.000799.1	2P.scaffold-3118	929	8599	Protein of unknown function
AGROCRI.2P.000800.1	2P.scaffold-4860	1139	1289	Beta-glucosidase 13
AGROCRI.2P.000801.1	2P.scaffold-4860	1638	4186	Beta-glucosidase 12
AGROCRI.2P.000802.1	2P.scaffold-210314	1490	4972	Protein of unknown function
AGROCRI.2P.000803.1	2P.scaffold-16471	10	1386	Protein of unknown function
AGROCRI.2P.000804.1	2P.scaffold-16471	2632	5453	Protein of unknown function
AGROCRI.2P.000805.1	2P.scaffold-4232	276	707	Protein of unknown function
AGROCRI.2P.000806.1	2P.scaffold-4232	1064	6243	Protein of unknown function
AGROCRI.2P.000807.1	2P.scaffold-5254	4426	9213	Protein of unknown function
AGROCRI.2P.000808.1	2P.scaffold-91825	2	6432	Protein of unknown function
AGROCRI.2P.000809.1	2P.scaffold-50739	4470	9110	Protein of unknown function
AGROCRI.2P.000810.1	2P.scaffold-20093	2790	6773	Protein of unknown function
AGROCRI.2P.000811.1	2P.scaffold-20093	7401	8657	Protein of unknown function
AGROCRI.2P.000812.1	2P.scaffold-3416	3659	6562	Secretory carrier-associated membrane protein 6
AGROCRI.2P.000813.1	2P.scaffold-5340	2	1846	Protein of unknown function
AGROCRI.2P.000814.1	2P.scaffold-5340	4154	6440	Protein of unknown function
AGROCRI.2P.000815.1	2P.scaffold-858	1908	5143	Protein of unknown function
AGROCRI.2P.000816.1	2P.scaffold-5396	1918	4486	Protein of unknown function
AGROCRI.2P.000817.1	2P.scaffold-5396	6251	7530	Protein of unknown function
AGROCRI.2P.000818.1	2P.scaffold-4826	2	412	Protein of unknown function
AGROCRI.2P.000819.1	2P.scaffold-4826	1714	5207	SPX domain-containing membrane protein Os04g0573000
AGROCRI.2P.000820.1	2P.scaffold-5491	8363	11429	Protein of unknown function
AGROCRI.2P.000821.1	2P.scaffold-13924	1484	2450	Auxin response factor 12
AGROCRI.2P.000822.1	2P.scaffold-13924	3042	5385	Protein of unknown function
AGROCRI.2P.000823.1	2P.scaffold-3338	3673	6594	Protein of unknown function
AGROCRI.2P.000824.1	2P.scaffold-5677	899	1432	Protein of unknown function
AGROCRI.2P.000825.1	2P.scaffold-5677	3345	8246	SUMO-activating enzyme subunit 2
AGROCRI.2P.000826.1	2P.scaffold-878	770	3168	Protein of unknown function
AGROCRI.2P.000827.1	2P.scaffold-878	4794	6719	Protein of unknown function
AGROCRI.2P.000828.1	2P.scaffold-214643	164	6469	Protein of unknown function
AGROCRI.2P.000829.1	2P.scaffold-214643	7134	11297	Protein of unknown function
AGROCRI.2P.000830.1	2P.scaffold-4173	4318	8125	Malate dehydrogenase [NADP] 1
AGROCRI.2P.000831.1	2P.scaffold-113048	611	3087	Protein of unknown function
AGROCRI.2P.000832.1	2P.scaffold-2985	198	8284	Protein of unknown function
AGROCRI.2P.000833.1	2P.scaffold-6254	4201	7584	Protein of unknown function
AGROCRI.2P.000834.1	2P.scaffold-6254	8749	9933	Protein of unknown function
AGROCRI.2P.000835.1	2P.scaffold-64269	1732	3630	Protein of unknown function
AGROCRI.2P.000836.1	2P.scaffold-64269	3924	7148	Protein of unknown function
AGROCRI.2P.000837.1	2P.scaffold-64269	8017	9408	Protein of unknown function
AGROCRI.2P.000838.1	2P.scaffold-9481	757	4654	Protein of unknown function
AGROCRI.2P.000839.1	2P.scaffold-9481	5723	6220	Protein of unknown function
AGROCRI.2P.000840.1	2P.scaffold-9481	7650	8513	Protein of unknown function
AGROCRI.2P.000841.1	2P.scaffold-6869	1014	2295	Protein of unknown function
AGROCRI.2P.000842.1	2P.scaffold-6869	3277	7720	Protein of unknown function
AGROCRI.2P.000843.1	2P.scaffold-3525	1835	11284	Protein of unknown function
AGROCRI.2P.000844.1	2P.scaffold-4720	919	1921	Protein of unknown function
AGROCRI.2P.000845.1	2P.scaffold-4720	2918	4607	Protein of unknown function
AGROCRI.2P.000846.1	2P.scaffold-212728	2231	3965	Protein of unknown function
AGROCRI.2P.000847.1	2P.scaffold-212728	4532	5010	Protein of unknown function
AGROCRI.2P.000848.1	2P.scaffold-2483	6605	15791	Protein of unknown function
AGROCRI.2P.000849.1	2P.scaffold-161419	74	676	Protein of unknown function
AGROCRI.2P.000850.1	2P.scaffold-161419	2319	5249	Protein of unknown function
AGROCRI.2P.000851.1	2P.scaffold-7110	46	3086	Protein of unknown function
AGROCRI.2P.000852.1	2P.scaffold-55385	93	4133	Protein of unknown function
AGROCRI.2P.000853.1	2P.scaffold-55385	4582	5462	Protein of unknown function
AGROCRI.2P.000854.1	2P.scaffold-152	3	1468	Protein of unknown function
AGROCRI.2P.000855.1	2P.scaffold-152	2380	6567	Protein of unknown function
AGROCRI.2P.000856.1	2P.scaffold-215428	5519	12981	Beta-glucosidase 12
AGROCRI.2P.000857.1	2P.scaffold-74832	1936	2577	Protein of unknown function
AGROCRI.2P.000858.1	2P.scaffold-74832	7400	10891	DNA (cytosine-5)-methyltransferase DRM2
AGROCRI.2P.000859.1	2P.scaffold-3397	657	2604	Protein of unknown function
AGROCRI.2P.000860.1	2P.scaffold-3397	5573	6913	Protein of unknown function
AGROCRI.2P.000861.1	2P.scaffold-33959	127	1091	Nuclear/nucleolar GTPase 2
AGROCRI.2P.000862.1	2P.scaffold-33959	2119	3961	Protein of unknown function
AGROCRI.2P.000863.1	2P.scaffold-65687	6183	12927	Protein of unknown function
AGROCRI.2P.000864.1	2P.scaffold-206059	1828	4209	Putative syntaxin-131
AGROCRI.2P.000865.1	2P.scaffold-3909	7998	13452	Auxin response factor 12
AGROCRI.2P.000866.1	2P.scaffold-214199	8050	12056	Protein of unknown function
AGROCRI.2P.000867.1	2P.scaffold-214805	446	1685	Protein of unknown function
AGROCRI.2P.000868.1	2P.scaffold-214805	2100	5872	SUMO-conjugating enzyme SCE1
AGROCRI.2P.000869.1	2P.scaffold-214805	6770	7415	Protein of unknown function
AGROCRI.2P.000870.1	2P.scaffold-211996	1	2499	Protein of unknown function
AGROCRI.2P.000871.1	2P.scaffold-211996	3525	4421	Protein of unknown function
AGROCRI.2P.000872.1	2P.scaffold-3198	2	1675	Protein of unknown function
AGROCRI.2P.000873.1	2P.scaffold-3198	2883	5102	Protein of unknown function
AGROCRI.2P.000874.1	2P.scaffold-3706	7	5499	Protein of unknown function
AGROCRI.2P.000875.1	2P.scaffold-32306	177	4037	Protein of unknown function
AGROCRI.2P.000876.1	2P.scaffold-2933	1866	18428	Protein of unknown function
AGROCRI.2P.000877.1	2P.scaffold-213923	868	5748	Beta-glucosidase 12
AGROCRI.2P.000878.1	2P.scaffold-56299	1799	6883	Beta-glucuronosyltransferase GlcAT14A
AGROCRI.2P.000879.1	2P.scaffold-56299	19865	20437	Protein of unknown function
AGROCRI.2P.000880.1	2P.scaffold-215225	706	993	Protein of unknown function
AGROCRI.2P.000881.1	2P.scaffold-215225	7175	9208	Protein of unknown function
AGROCRI.2P.000882.1	2P.scaffold-215225	15575	15952	Protein of unknown function
AGROCRI.2P.000883.1	2P.scaffold-3799	3817	8346	Casein kinase II subunit alpha-2
AGROCRI.2P.000884.1	2P.scaffold-7035	582	1561	Photosystem II 10 kDa polypeptide
AGROCRI.2P.000885.1	2P.scaffold-7035	4238	5033	Photosystem II 10 kDa polypeptide
AGROCRI.2P.000886.1	2P.scaffold-3526	4168	7933	Ent-kaur-16-ene synthase
AGROCRI.2P.000887.1	2P.scaffold-3522	1001	4025	Heat shock 70 kDa protein
AGROCRI.2P.000888.1	2P.scaffold-3522	4876	7691	Protein of unknown function
AGROCRI.2P.000889.1	2P.scaffold-2950	46	1440	Protein of unknown function
AGROCRI.2P.000890.1	2P.scaffold-2950	2334	5324	Protein of unknown function
AGROCRI.2P.000891.1	2P.scaffold-5022	1574	5097	Protein of unknown function
AGROCRI.2P.000892.1	2P.scaffold-5022	5678	10082	Protein of unknown function
AGROCRI.2P.000893.1	2P.scaffold-111442	544	2692	Protein of unknown function
AGROCRI.2P.000894.1	2P.scaffold-3392	3	2554	Protein of unknown function
AGROCRI.2P.000895.1	2P.scaffold-3392	5092	7172	Protein of unknown function
AGROCRI.2P.000896.1	2P.scaffold-24085	2251	5686	Protein of unknown function
AGROCRI.2P.000897.1	2P.scaffold-24085	6218	10789	Protein of unknown function
AGROCRI.2P.000898.1	2P.scaffold-3209	2979	7236	Protein of unknown function
AGROCRI.2P.000899.1	2P.scaffold-3300	4657	10985	Protein of unknown function
AGROCRI.2P.000900.1	2P.scaffold-52088	1599	4602	Protein of unknown function
AGROCRI.2P.000901.1	2P.scaffold-46383	661	6969	Protein of unknown function
AGROCRI.2P.000902.1	2P.scaffold-3251	2040	8889	Protein of unknown function
AGROCRI.2P.000903.1	2P.scaffold-536	12877	15158	Protein of unknown function
AGROCRI.2P.000904.1	2P.scaffold-536	15846	16966	Protein of unknown function
AGROCRI.2P.000905.1	2P.scaffold-5008	3620	6720	Protein of unknown function
AGROCRI.2P.000906.1	2P.scaffold-212339	37	5809	Protein of unknown function
AGROCRI.2P.000907.1	2P.scaffold-212339	7722	8626	Protein of unknown function
AGROCRI.2P.000908.1	2P.scaffold-56152	1670	8258	Protein of unknown function
AGROCRI.2P.000909.1	2P.scaffold-18	4461	10404	Protein of unknown function
AGROCRI.2P.000910.1	2P.scaffold-215287	816	1145	Protein of unknown function
AGROCRI.2P.000911.1	2P.scaffold-215287	5703	12254	Protein of unknown function
AGROCRI.2P.000912.1	2P.scaffold-795	2114	4794	Protein of unknown function
AGROCRI.2P.000913.1	2P.scaffold-795	5377	6583	Protein of unknown function
AGROCRI.2P.000914.1	2P.scaffold-795	7175	9336	Protein of unknown function
AGROCRI.2P.000915.1	2P.scaffold-5458	2112	4187	40S ribosomal protein S10-2
AGROCRI.2P.000916.1	2P.scaffold-5458	4800	6051	Protein of unknown function
AGROCRI.2P.000917.1	2P.scaffold-3007	281	4976	GPCR-type G protein COLD1
AGROCRI.2P.000918.1	2P.scaffold-5650	2652	6169	Protein of unknown function
AGROCRI.2P.000919.1	2P.scaffold-31	5920	9593	Protein of unknown function
AGROCRI.2P.000920.1	2P.scaffold-3738	1386	2552	Peroxisome biogenesis protein 22
AGROCRI.2P.000921.1	2P.scaffold-3738	3817	6818	Protein of unknown function
AGROCRI.2P.000922.1	2P.scaffold-211009	214	5980	Metal tolerance protein C4
AGROCRI.2P.000923.1	2P.scaffold-3166	3072	9271	Protein of unknown function
AGROCRI.2P.000924.1	2P.scaffold-16368	81	7037	Protein of unknown function
AGROCRI.2P.000925.1	2P.scaffold-7030	405	3962	Protein of unknown function
AGROCRI.2P.000926.1	2P.scaffold-3088	3	3106	Protein of unknown function
AGROCRI.2P.000927.1	2P.scaffold-3088	6461	9479	Protein of unknown function
AGROCRI.2P.000928.1	2P.scaffold-214929	11075	21088	Protein of unknown function
AGROCRI.2P.000929.1	2P.scaffold-3945	2507	7035	Protein of unknown function
AGROCRI.2P.000930.1	2P.scaffold-4679	3719	7993	Protein of unknown function
AGROCRI.2P.000931.1	2P.scaffold-1102	1	502	Protein of unknown function
AGROCRI.2P.000932.1	2P.scaffold-1102	152	5695	Protein of unknown function
AGROCRI.2P.000933.1	2P.scaffold-135201	1035	4055	Protein of unknown function
AGROCRI.2P.000934.1	2P.scaffold-135201	5009	8473	Protein of unknown function
AGROCRI.2P.000935.1	2P.scaffold-6378	5643	12488	Protein of unknown function
AGROCRI.2P.000936.1	2P.scaffold-6378	14251	15857	Casein kinase II subunit beta-1
AGROCRI.2P.000937.1	2P.scaffold-214391	3016	6306	Protein of unknown function
AGROCRI.2P.000938.1	2P.scaffold-2305	140	5474	Protein of unknown function
AGROCRI.2P.000939.1	2P.scaffold-215199	809	1916	Thioredoxin-like protein CXXS1
AGROCRI.2P.000940.1	2P.scaffold-215199	3041	4192	Thioredoxin-like protein CXXS1
AGROCRI.2P.000941.1	2P.scaffold-215199	5131	5544	Protein of unknown function
AGROCRI.2P.000942.1	2P.scaffold-215199	7818	10022	Protein of unknown function
AGROCRI.2P.000943.1	2P.scaffold-28881	356	1805	Protein of unknown function
AGROCRI.2P.000944.1	2P.scaffold-28881	3037	8146	Protein of unknown function
AGROCRI.2P.000945.1	2P.scaffold-3468	1270	8032	Mitogen-activated protein kinase kinase kinase YODA
AGROCRI.2P.000946.1	2P.scaffold-19366	1555	4321	Protein of unknown function
AGROCRI.2P.000947.1	2P.scaffold-3304	4865	9140	Serine/threonine-protein phosphatase PP2A-4 catalytic subunit
AGROCRI.2P.000948.1	2P.scaffold-8919	596	2605	Protein of unknown function
AGROCRI.2P.000949.1	2P.scaffold-214459	6155	9157	NADH dehydrogenase [ubiquinone] 1 alpha subcomplex subunit 13-B
AGROCRI.2P.000950.1	2P.scaffold-214459	15666	19181	Protein of unknown function
AGROCRI.2P.000951.1	2P.scaffold-6012	1673	5181	Protein of unknown function
AGROCRI.2P.000952.1	2P.scaffold-6012	5902	9613	Protein of unknown function
AGROCRI.2P.000953.1	2P.scaffold-214486	3843	8647	Protein of unknown function
AGROCRI.2P.000954.1	2P.scaffold-109751	2764	5923	Protein of unknown function
AGROCRI.2P.000955.1	2P.scaffold-11285	611	6444	Protein of unknown function
AGROCRI.2P.000956.1	2P.scaffold-9279	1525	2076	Protein of unknown function
AGROCRI.2P.000957.1	2P.scaffold-9279	2818	3189	Protein of unknown function
AGROCRI.2P.000958.1	2P.scaffold-9279	6729	9831	Protein of unknown function
AGROCRI.2P.000959.1	2P.scaffold-52835	1483	2471	Protein of unknown function
AGROCRI.2P.000960.1	2P.scaffold-52835	24494	26427	Protein of unknown function
AGROCRI.2P.000961.1	2P.scaffold-92677	2	4554	Protein of unknown function
AGROCRI.2P.000962.1	2P.scaffold-6013	444	2777	Protein of unknown function
AGROCRI.2P.000963.1	2P.scaffold-21066	2	3476	Protein of unknown function
AGROCRI.2P.000964.1	2P.scaffold-21066	3891	6179	Protein of unknown function
AGROCRI.2P.000965.1	2P.scaffold-12401	52	5251	Protein of unknown function
AGROCRI.2P.000966.1	2P.scaffold-3515	2666	9063	Protein of unknown function
AGROCRI.2P.000967.1	2P.scaffold-6093	1829	2179	Protein of unknown function
AGROCRI.2P.000968.1	2P.scaffold-6093	3253	3549	Protein of unknown function
AGROCRI.2P.000969.1	2P.scaffold-6093	4417	5166	Protein of unknown function
AGROCRI.2P.000970.1	2P.scaffold-6093	5827	8989	Protein of unknown function
AGROCRI.2P.000971.1	2P.scaffold-93	16995	23143	Protein of unknown function
AGROCRI.2P.000972.1	2P.scaffold-139446	838	4669	Protein of unknown function
AGROCRI.2P.000973.1	2P.scaffold-4210	1354	5373	Protein of unknown function
AGROCRI.2P.000974.1	2P.scaffold-86751	3814	6888	Protein of unknown function
AGROCRI.2P.000975.1	2P.scaffold-86751	9118	9555	Protein of unknown function
AGROCRI.2P.000976.1	2P.scaffold-9601	103	2012	Sphingoid long-chain bases kinase 2
AGROCRI.2P.000977.1	2P.scaffold-9601	7163	8473	Protein of unknown function
AGROCRI.2P.000978.1	2P.scaffold-3383	2577	3036	Protein of unknown function
AGROCRI.2P.000979.1	2P.scaffold-3383	4230	7582	Protein of unknown function
AGROCRI.2P.000980.1	2P.scaffold-3444	1616	6472	Chaperone protein ClpC1
AGROCRI.2P.000981.1	2P.scaffold-3444	9575	9901	Protein of unknown function
AGROCRI.2P.000982.1	2P.scaffold-1999	729	4453	Protein of unknown function
AGROCRI.2P.000983.1	2P.scaffold-11842	2234	5670	Protein of unknown function
AGROCRI.2P.000984.1	2P.scaffold-215594	1933	7779	Protein of unknown function
AGROCRI.2P.000985.1	2P.scaffold-14883	118	7088	Protein of unknown function
AGROCRI.2P.000986.1	2P.scaffold-215510	10	840	Protein of unknown function
AGROCRI.2P.000987.1	2P.scaffold-215510	10364	11277	Protein of unknown function
AGROCRI.2P.000988.1	2P.scaffold-215510	11373	14791	Acetylserotonin O-methyltransferase 3
AGROCRI.2P.000989.1	2P.scaffold-3879	355	5479	Protein of unknown function
AGROCRI.2P.000990.1	2P.scaffold-41796	3	3666	Protein of unknown function
AGROCRI.2P.000991.1	2P.scaffold-41796	4513	5942	Protein of unknown function
AGROCRI.2P.000992.1	2P.scaffold-214996	83	435	Protein of unknown function
AGROCRI.2P.000993.1	2P.scaffold-214996	3070	3417	Protein of unknown function
AGROCRI.2P.000994.1	2P.scaffold-214996	5055	5459	Protein of unknown function
AGROCRI.2P.000995.1	2P.scaffold-214996	7288	7973	Protein of unknown function
AGROCRI.2P.000996.1	2P.scaffold-125556	3222	3905	Protein of unknown function
AGROCRI.2P.000997.1	2P.scaffold-125556	8926	9517	Protein of unknown function
AGROCRI.2P.000998.1	2P.scaffold-125556	10409	12088	Protein of unknown function
AGROCRI.2P.000999.1	2P.scaffold-32214	486	2740	Protein of unknown function
AGROCRI.2P.001000.1	2P.scaffold-3451	2746	5432	Protein of unknown function
AGROCRI.2P.001001.1	2P.scaffold-6367	662	3208	Protein of unknown function
AGROCRI.2P.001002.1	2P.scaffold-6367	3685	4982	Protein of unknown function
AGROCRI.2P.001003.1	2P.scaffold-213837	1037	2357	Protein of unknown function
AGROCRI.2P.001004.1	2P.scaffold-213837	4047	6009	Probable staphylococcal-like nuclease CAN3
AGROCRI.2P.001005.1	2P.scaffold-150041	2702	5471	Protein of unknown function
AGROCRI.2P.001006.1	2P.scaffold-150041	23208	24071	Protein of unknown function
AGROCRI.2P.001007.1	2P.scaffold-150041	24159	24854	Protein of unknown function
AGROCRI.2P.001008.1	2P.scaffold-13008	4744	9070	Protein of unknown function
AGROCRI.2P.001009.1	2P.scaffold-13008	10302	11758	Protein of unknown function
AGROCRI.2P.001010.1	2P.scaffold-8212	12737	14754	Protein of unknown function
AGROCRI.2P.001011.1	2P.scaffold-8212	19503	20765	Transportin-1
AGROCRI.2P.001012.1	2P.scaffold-5929	103	3167	Ent-kaur-16-ene synthase
AGROCRI.2P.001013.1	2P.scaffold-52198	1	349	Protein of unknown function
AGROCRI.2P.001014.1	2P.scaffold-52198	1981	3507	Protein of unknown function
AGROCRI.2P.001015.1	2P.scaffold-52198	4957	5625	Protein of unknown function
AGROCRI.2P.001016.1	2P.scaffold-3466	10179	13511	Eukaryotic translation initiation factor 3 subunit H
AGROCRI.2P.001017.1	2P.scaffold-36562	3462	8645	Protein of unknown function
AGROCRI.2P.001018.1	2P.scaffold-36562	11578	12006	Protein of unknown function
AGROCRI.2P.001019.1	2P.scaffold-12579	1114	4330	Protein of unknown function
AGROCRI.2P.001020.1	2P.scaffold-12579	7574	9674	Protein of unknown function
AGROCRI.2P.001021.1	2P.scaffold-3674	3426	6619	Protein of unknown function
AGROCRI.2P.001022.1	2P.scaffold-5295	1	789	Aquaporin NIP3-3
AGROCRI.2P.001023.1	2P.scaffold-5295	1278	3465	Glutathione gamma-glutamylcysteinyltransferase 1
AGROCRI.2P.001024.1	2P.scaffold-213674	1003	6397	Chloride channel protein CLC-c
AGROCRI.2P.001025.1	2P.scaffold-213674	8153	11485	Protein of unknown function
AGROCRI.2P.001026.1	2P.scaffold-13424	882	4066	Protein of unknown function
AGROCRI.2P.001027.1	2P.scaffold-302	1363	4112	Protein of unknown function
AGROCRI.2P.001028.1	2P.scaffold-3131	8526	11284	Protein of unknown function
AGROCRI.2P.001029.1	2P.scaffold-6359	8174	14313	Protein of unknown function
AGROCRI.2P.001030.1	2P.scaffold-26660	4172	6605	Protein of unknown function
AGROCRI.2P.001031.1	2P.scaffold-6459	421	3710	Protein of unknown function
AGROCRI.2P.001032.1	2P.scaffold-6459	4521	6410	Protein of unknown function
AGROCRI.2P.001033.1	2P.scaffold-52877	137	10733	ABC transporter G family member 48
AGROCRI.2P.001034.1	2P.scaffold-2978	53	1768	Protein of unknown function
AGROCRI.2P.001035.1	2P.scaffold-2978	13277	13911	Protein of unknown function
AGROCRI.2P.001036.1	2P.scaffold-2978	16321	17029	Protein of unknown function
AGROCRI.2P.001037.1	2P.scaffold-214262	9995	14054	Protein of unknown function
AGROCRI.2P.001038.1	2P.scaffold-215762	16239	20360	Protein of unknown function
AGROCRI.2P.001039.1	2P.scaffold-215762	34163	36318	Protein of unknown function
AGROCRI.2P.001040.1	2P.scaffold-11623	816	2708	Protein of unknown function
AGROCRI.2P.001041.1	2P.scaffold-11623	7665	9459	Protein of unknown function
AGROCRI.2P.001042.1	2P.scaffold-11623	9516	11592	Protein of unknown function
AGROCRI.2P.001043.1	2P.scaffold-533	3270	6825	Protein of unknown function
AGROCRI.2P.001044.1	2P.scaffold-533	9150	9539	Protein of unknown function
AGROCRI.2P.001045.1	2P.scaffold-5529	1975	5339	Protein of unknown function
AGROCRI.2P.001046.1	2P.scaffold-214814	568	5322	Serine/threonine-protein kinase BSK1-2
AGROCRI.2P.001047.1	2P.scaffold-198300	2	2920	Protein of unknown function
AGROCRI.2P.001048.1	2P.scaffold-198300	7420	9228	Protein of unknown function
AGROCRI.2P.001049.1	2P.scaffold-4858	1602	3124	Glyceraldehyde-3-phosphate dehydrogenase A
AGROCRI.2P.001050.1	2P.scaffold-4858	4244	6190	Protein of unknown function
AGROCRI.2P.001051.1	2P.scaffold-4624	1628	10193	Probable potassium transporter 14
AGROCRI.2P.001052.1	2P.scaffold-3790	15	3419	Protein of unknown function
AGROCRI.2P.001053.1	2P.scaffold-3790	6273	11594	Protein of unknown function
AGROCRI.2P.001054.1	2P.scaffold-2966	6143	10980	Vacuolar protein sorting-associated protein 24 homolog 1
AGROCRI.2P.001055.1	2P.scaffold-2966	12119	12418	Protein of unknown function
AGROCRI.2P.001056.1	2P.scaffold-2966	14850	15212	Protein of unknown function
AGROCRI.2P.001057.1	2P.scaffold-8330	6	6212	Protein of unknown function
AGROCRI.2P.001058.1	2P.scaffold-18828	99	5635	Protein of unknown function
AGROCRI.2P.001059.1	2P.scaffold-18046	2011	6824	Protein of unknown function
AGROCRI.2P.001060.1	2P.scaffold-5898	379	3340	Protein of unknown function
AGROCRI.2P.001061.1	2P.scaffold-112821	1329	7005	Protein of unknown function
AGROCRI.2P.001062.1	2P.scaffold-4980	592	1695	Protein of unknown function
AGROCRI.2P.001063.1	2P.scaffold-4980	2191	4104	Protein-L-isoaspartate O-methyltransferase
AGROCRI.2P.001064.1	2P.scaffold-11	2448	7314	Protein of unknown function
AGROCRI.2P.001065.1	2P.scaffold-11	8994	9714	Protein of unknown function
AGROCRI.2P.001066.1	2P.scaffold-4333	1	4649	Probable E3 ubiquitin-protein ligase HIP1
AGROCRI.2P.001067.1	2P.scaffold-4333	3060	5393	Protein of unknown function
AGROCRI.2P.001068.1	2P.scaffold-3744	1010	3749	Calmodulin-binding transcription activator 2
AGROCRI.2P.001069.1	2P.scaffold-3744	5697	6390	Protein of unknown function
AGROCRI.2P.001070.1	2P.scaffold-7721	414	3161	Polyamine oxidase 5
AGROCRI.2P.001071.1	2P.scaffold-14475	1688	9407	tRNA wybutosine-synthesizing protein 2/3/4
AGROCRI.2P.001072.1	2P.scaffold-3870	1454	4598	Putative glucose-6-phosphate 1-epimerase
AGROCRI.2P.001073.1	2P.scaffold-3870	7205	7603	Protein of unknown function
AGROCRI.2P.001074.1	2P.scaffold-3915	825	4803	Glutathione reductase
AGROCRI.2P.001075.1	2P.scaffold-215632	10991	15016	SH3 domain-containing protein 2
AGROCRI.2P.001076.1	2P.scaffold-6235	2145	4645	Protein of unknown function
AGROCRI.2P.001077.1	2P.scaffold-12096	5005	9187	Protein of unknown function
AGROCRI.2P.001078.1	2P.scaffold-215388	21104	32059	Protein of unknown function
AGROCRI.2P.001079.1	2P.scaffold-26892	2	293	Protein of unknown function
AGROCRI.2P.001080.1	2P.scaffold-26892	914	4146	Protein of unknown function
AGROCRI.2P.001081.1	2P.scaffold-4413	566	4285	Protein of unknown function
AGROCRI.2P.001082.1	2P.scaffold-5406	3452	7870	Protein of unknown function
AGROCRI.2P.001083.1	2P.scaffold-3229	3922	13977	Splicing factor 3B subunit 4
AGROCRI.2P.001084.1	2P.scaffold-125411	2	2756	Protein of unknown function
AGROCRI.2P.001085.1	2P.scaffold-125411	3848	4706	Protein of unknown function
AGROCRI.2P.001086.1	2P.scaffold-8225	11043	15957	Probable serine acetyltransferase 2
AGROCRI.2P.001087.1	2P.scaffold-4115	1086	4856	Kelch repeat-containing protein At3g27220
AGROCRI.2P.001088.1	2P.scaffold-4115	5680	7381	Protein of unknown function
AGROCRI.2P.001089.1	2P.scaffold-4945	1	2272	Protein of unknown function
AGROCRI.2P.001090.1	2P.scaffold-4945	4532	7116	2-methoxy-6-polyprenyl-1
AGROCRI.2P.001091.1	2P.scaffold-30449	832	4065	Protein of unknown function
AGROCRI.2P.001092.1	2P.scaffold-66728	208	3589	Protein of unknown function
AGROCRI.2P.001093.1	2P.scaffold-66728	5358	6625	Protein of unknown function
AGROCRI.2P.001094.1	2P.scaffold-9339	3165	9682	Protein of unknown function
AGROCRI.2P.001095.1	2P.scaffold-3473	1230	5023	Protein of unknown function
AGROCRI.2P.001096.1	2P.scaffold-3473	7376	8798	Protein of unknown function
AGROCRI.2P.001097.1	2P.scaffold-96515	2994	12638	Protein of unknown function
AGROCRI.2P.001098.1	2P.scaffold-3356	3463	7677	Casein kinase II subunit alpha-2
AGROCRI.2P.001099.1	2P.scaffold-5852	831	6642	Protein of unknown function
AGROCRI.2P.001100.1	2P.scaffold-6590	1033	5967	Protein of unknown function
AGROCRI.2P.001101.1	2P.scaffold-5353	1	5551	Protein of unknown function
AGROCRI.2P.001102.1	2P.scaffold-215785	249	539	Protein of unknown function
AGROCRI.2P.001103.1	2P.scaffold-215785	1732	2241	Protein of unknown function
AGROCRI.2P.001104.1	2P.scaffold-215785	9387	11257	Protein of unknown function
AGROCRI.2P.001105.1	2P.scaffold-3328	351	1034	Protein of unknown function
AGROCRI.2P.001106.1	2P.scaffold-3328	1969	4239	Protein of unknown function
AGROCRI.2P.001107.1	2P.scaffold-3328	5580	8797	UDP-xylose transporter 1
AGROCRI.2P.001108.1	2P.scaffold-42669	736	4054	Indole-3-acetaldehyde oxidase
AGROCRI.2P.001109.1	2P.scaffold-42669	5061	6149	Protein of unknown function
AGROCRI.2P.001110.1	2P.scaffold-4452	10368	12351	Protein of unknown function
AGROCRI.2P.001111.1	2P.scaffold-4452	13757	16206	Protein of unknown function
AGROCRI.2P.001112.1	2P.scaffold-215605	2478	4520	Protein of unknown function
AGROCRI.2P.001113.1	2P.scaffold-215605	5817	8005	Protein of unknown function
AGROCRI.2P.001114.1	2P.scaffold-215605	14065	15478	Protein of unknown function
AGROCRI.2P.001115.1	2P.scaffold-3001	1076	3662	Isocitrate dehydrogenase [NADP]
AGROCRI.2P.001116.1	2P.scaffold-3820	822	3672	Elongation factor G
AGROCRI.2P.001117.1	2P.scaffold-3820	5104	7410	Hsp70-Hsp90 organizing protein
AGROCRI.2P.001118.1	2P.scaffold-215666	10860	17446	Protein of unknown function
AGROCRI.2P.001119.1	2P.scaffold-215666	18131	18603	Protein of unknown function
AGROCRI.2P.001120.1	2P.scaffold-214344	148	7302	Beta-glucosidase 16
AGROCRI.2P.001121.1	2P.scaffold-4303	513	6660	Protein of unknown function
AGROCRI.2P.001122.1	2P.scaffold-215267	3491	8696	Protein of unknown function
AGROCRI.2P.001123.1	2P.scaffold-215267	15446	18905	Protein of unknown function
AGROCRI.2P.001124.1	2P.scaffold-76549	4369	5595	Protein of unknown function
AGROCRI.2P.001125.1	2P.scaffold-76549	6488	9806	Indole-3-acetaldehyde oxidase
AGROCRI.2P.001126.1	2P.scaffold-214982	1655	4619	Protein of unknown function
AGROCRI.2P.001127.1	2P.scaffold-214982	10425	12975	Protein of unknown function
AGROCRI.2P.001128.1	2P.scaffold-3196	9	1429	Protein of unknown function
AGROCRI.2P.001129.1	2P.scaffold-3196	4262	6151	Protein of unknown function
AGROCRI.2P.001130.1	2P.scaffold-213911	1272	5238	LRR receptor kinase SERK2
AGROCRI.2P.001131.1	2P.scaffold-2999	1528	2057	Protein of unknown function
AGROCRI.2P.001132.1	2P.scaffold-2999	2815	6165	Protein of unknown function
AGROCRI.2P.001133.1	2P.scaffold-98108	1006	6620	Protein of unknown function
AGROCRI.2P.001134.1	2P.scaffold-4621	94	1661	Sucrose transport protein SUT5
AGROCRI.2P.001135.1	2P.scaffold-4621	3898	4714	Protein of unknown function
AGROCRI.2P.001136.1	2P.scaffold-215901	3121	6625	Protein of unknown function
AGROCRI.2P.001137.1	2P.scaffold-215901	7144	7792	Protein of unknown function
AGROCRI.2P.001138.1	2P.scaffold-214906	10778	13681	Protein of unknown function
AGROCRI.2P.001139.1	2P.scaffold-214906	19113	20637	Protein of unknown function
AGROCRI.2P.001140.1	2P.scaffold-9679	9705	13912	Protein of unknown function
AGROCRI.2P.001141.1	2P.scaffold-2979	3086	7759	Omega-amidase
AGROCRI.2P.001142.1	2P.scaffold-3598	2307	2984	Protein of unknown function
AGROCRI.2P.001143.1	2P.scaffold-3598	5384	11789	Protein of unknown function
AGROCRI.2P.001144.1	2P.scaffold-48909	414	811	Protein of unknown function
AGROCRI.2P.001145.1	2P.scaffold-48909	2881	6168	Glutamate--tRNA ligase
AGROCRI.2P.001146.1	2P.scaffold-214946	243	2735	Methylthioribose kinase 1
AGROCRI.2P.001147.1	2P.scaffold-214946	5221	5664	Methylthioribose kinase 2
AGROCRI.2P.001148.1	2P.scaffold-211992	534	3665	Protein of unknown function
AGROCRI.2P.001149.1	2P.scaffold-211992	4152	4985	Protein of unknown function
AGROCRI.2P.001150.1	2P.scaffold-211992	10588	12069	Protein of unknown function
AGROCRI.2P.001151.1	2P.scaffold-14931	5202	8970	Protein of unknown function
AGROCRI.2P.001152.1	2P.scaffold-22654	6128	8784	Protein of unknown function
AGROCRI.2P.001153.1	2P.scaffold-3185	1767	8913	Protein of unknown function
AGROCRI.2P.001154.1	2P.scaffold-3403	348	1775	Protein of unknown function
AGROCRI.2P.001155.1	2P.scaffold-3403	2656	3830	Vesicle transport protein GOT1
AGROCRI.2P.001156.1	2P.scaffold-214772	3986	5936	Pectin acetylesterase 3
AGROCRI.2P.001157.1	2P.scaffold-211343	2286	5075	Protein of unknown function
AGROCRI.2P.001158.1	2P.scaffold-211343	6014	8786	Protein of unknown function
AGROCRI.2P.001159.1	2P.scaffold-169861	9	3773	Protein of unknown function
AGROCRI.2P.001160.1	2P.scaffold-55182	563	3360	Protein of unknown function
AGROCRI.2P.001161.1	2P.scaffold-12354	1758	5594	Protein of unknown function
AGROCRI.2P.001162.1	2P.scaffold-3737	609	3380	Protein of unknown function
AGROCRI.2P.001163.1	2P.scaffold-3737	5533	7760	Probable pyruvate
AGROCRI.2P.001164.1	2P.scaffold-93277	207	3867	Dol-P-Man:Man(7)GlcNAc(2)-PP-Dol alpha-1
AGROCRI.2P.001165.1	2P.scaffold-99245	1257	3889	Protein of unknown function
AGROCRI.2P.001166.1	2P.scaffold-5728	85	2469	Protein of unknown function
AGROCRI.2P.001167.1	2P.scaffold-5728	2986	5109	Protein of unknown function
AGROCRI.2P.001168.1	2P.scaffold-5787	3779	4944	Protein of unknown function
AGROCRI.2P.001169.1	2P.scaffold-5787	5756	7193	Protein of unknown function
AGROCRI.2P.001170.1	2P.scaffold-33741	1072	3907	Protein of unknown function
AGROCRI.2P.001171.1	2P.scaffold-4328	1602	5165	Protein of unknown function
AGROCRI.2P.001172.1	2P.scaffold-3811	73	6781	Protein of unknown function
AGROCRI.2P.001173.1	2P.scaffold-3726	2789	13457	MADS-box transcription factor 1
AGROCRI.2P.001174.1	2P.scaffold-18772	896	3765	Zeta-carotene desaturase
AGROCRI.2P.001175.1	2P.scaffold-5989	1251	4716	Protein of unknown function
AGROCRI.2P.001176.1	2P.scaffold-17	6714	13540	Probable protein phosphatase 2C BIPP2C1
AGROCRI.2P.001177.1	2P.scaffold-8798	645	1264	Protein of unknown function
AGROCRI.2P.001178.1	2P.scaffold-8798	1430	3802	Protein of unknown function
AGROCRI.2P.001179.1	2P.scaffold-106769	499	1191	Protein of unknown function
AGROCRI.2P.001180.1	2P.scaffold-106769	1469	2604	Protein of unknown function
AGROCRI.2P.001181.1	2P.scaffold-106769	4094	4501	Protein of unknown function
AGROCRI.2P.001182.1	2P.scaffold-3863	1254	3815	Protein of unknown function
AGROCRI.2P.001183.1	2P.scaffold-3863	4880	6050	Protein of unknown function
AGROCRI.2P.001184.1	2P.scaffold-4442	330	4821	Protein of unknown function
AGROCRI.2P.001185.1	2P.scaffold-24278	43	1681	Protein of unknown function
AGROCRI.2P.001186.1	2P.scaffold-24278	2676	3780	Protein of unknown function
AGROCRI.2P.001187.1	2P.scaffold-24278	5466	7028	Protein of unknown function
AGROCRI.2P.001188.1	2P.scaffold-4318	117	2785	Protein of unknown function
AGROCRI.2P.001189.1	2P.scaffold-4318	3849	5613	Flavanone 3-dioxygenase 3
AGROCRI.2P.001190.1	2P.scaffold-8917	555	6989	Protein of unknown function
AGROCRI.2P.001191.1	2P.scaffold-6809	295	2434	Protein of unknown function
AGROCRI.2P.001192.1	2P.scaffold-4121	8286	9694	Protein of unknown function
AGROCRI.2P.001193.1	2P.scaffold-4121	10445	11948	Protein of unknown function
AGROCRI.2P.001194.1	2P.scaffold-4121	12467	13040	Protein of unknown function
AGROCRI.2P.001195.1	2P.scaffold-4060	2808	4608	Protein of unknown function
AGROCRI.2P.001196.1	2P.scaffold-4060	7016	7663	Protein of unknown function
AGROCRI.2P.001197.1	2P.scaffold-4060	7796	8242	Protein of unknown function
AGROCRI.2P.001198.1	2P.scaffold-214771	1072	3933	Protein of unknown function
AGROCRI.2P.001199.1	2P.scaffold-214771	4904	5577	Protein of unknown function
AGROCRI.2P.001200.1	2P.scaffold-3735	1	2494	Protein of unknown function
AGROCRI.2P.001201.1	2P.scaffold-3735	3970	7852	Protein of unknown function
AGROCRI.2P.001202.1	2P.scaffold-213893	2373	6754	Protein of unknown function
AGROCRI.2P.001203.1	2P.scaffold-6607	567	5570	Protein of unknown function
AGROCRI.2P.001204.1	2P.scaffold-3681	2231	4928	Protein of unknown function
AGROCRI.2P.001205.1	2P.scaffold-207730	1877	6310	Protein of unknown function
AGROCRI.2P.001206.1	2P.scaffold-4170	213	5376	Protein of unknown function
AGROCRI.2P.001207.1	2P.scaffold-212792	1134	5497	Protein of unknown function
AGROCRI.2P.001208.1	2P.scaffold-214865	1477	4173	Protein of unknown function
AGROCRI.2P.001209.1	2P.scaffold-214865	9733	11907	Protein of unknown function
AGROCRI.2P.001210.1	2P.scaffold-215014	927	2343	Protein of unknown function
AGROCRI.2P.001211.1	2P.scaffold-215014	10459	11101	Protein of unknown function
AGROCRI.2P.001212.1	2P.scaffold-215014	12766	15555	Protein of unknown function
AGROCRI.2P.001213.1	2P.scaffold-6716	336	3702	Protein of unknown function
AGROCRI.2P.001214.1	2P.scaffold-60096	2006	6230	Rhamnogalacturonan I rhamnosyltransferase 1
AGROCRI.2P.001215.1	2P.scaffold-71308	262	3277	Protein of unknown function
AGROCRI.2P.001216.1	2P.scaffold-4592	1584	4866	Protein of unknown function
AGROCRI.2P.001217.1	2P.scaffold-4696	135	4408	Protein of unknown function
AGROCRI.2P.001218.1	2P.scaffold-3359	1971	8097	Protein of unknown function
AGROCRI.2P.001219.1	2P.scaffold-3359	9911	10834	Protein of unknown function
AGROCRI.2P.001220.1	2P.scaffold-5133	1761	6820	Protein of unknown function
AGROCRI.2P.001221.1	2P.scaffold-5578	525	3889	Protein of unknown function
AGROCRI.2P.001222.1	2P.scaffold-101549	1593	3738	Protein of unknown function
AGROCRI.2P.001223.1	2P.scaffold-169455	1731	5953	Probable ribonuclease P/MRP protein subunit POP5
AGROCRI.2P.001224.1	2P.scaffold-24768	6396	7028	Protein of unknown function
AGROCRI.2P.001225.1	2P.scaffold-24768	7975	11352	Protein of unknown function
AGROCRI.2P.001226.1	2P.scaffold-42304	2218	4980	Protein of unknown function
AGROCRI.2P.001227.1	2P.scaffold-3739	3015	5366	Ureide permease 2
AGROCRI.2P.001228.1	2P.scaffold-3739	6278	7402	Protein of unknown function
AGROCRI.2P.001229.1	2P.scaffold-6739	67	2538	3-isopropylmalate dehydrogenase 2
AGROCRI.2P.001230.1	2P.scaffold-211613	1355	7855	Protein of unknown function
AGROCRI.2P.001231.1	2P.scaffold-9108	827	856	Protein of unknown function
AGROCRI.2P.001232.1	2P.scaffold-9108	1221	2581	Malate dehydrogenase [NADP]
AGROCRI.2P.001233.1	2P.scaffold-2943	10620	14110	Protein of unknown function
AGROCRI.2P.001234.1	2P.scaffold-2609	34	192	NAC domain-containing protein 104
AGROCRI.2P.001235.1	2P.scaffold-2609	2052	6367	Protein of unknown function
AGROCRI.2P.001236.1	2P.scaffold-8163	9318	14496	Protein of unknown function
AGROCRI.2P.001237.1	2P.scaffold-13972	382	3404	Probable V-type proton ATPase subunit H
AGROCRI.2P.001238.1	2P.scaffold-18480	12558	19456	Protein of unknown function
AGROCRI.2P.001239.1	2P.scaffold-18743	1336	1644	Protein of unknown function
AGROCRI.2P.001240.1	2P.scaffold-18743	3408	7234	Protein of unknown function
AGROCRI.2P.001241.1	2P.scaffold-199683	769	2535	Probable 26S proteasome non-ATPase regulatory subunit 3
AGROCRI.2P.001242.1	2P.scaffold-199683	3210	4770	Protein of unknown function
AGROCRI.2P.001243.1	2P.scaffold-287	2388	3980	Protein of unknown function
AGROCRI.2P.001244.1	2P.scaffold-287	6511	9119	Protein of unknown function
AGROCRI.2P.001245.1	2P.scaffold-159632	1832	8472	Protein of unknown function
AGROCRI.2P.001246.1	2P.scaffold-60039	1	606	Protein of unknown function
AGROCRI.2P.001247.1	2P.scaffold-60039	1247	4309	Protein of unknown function
AGROCRI.2P.001248.1	2P.scaffold-6225	1789	2925	Protein of unknown function
AGROCRI.2P.001249.1	2P.scaffold-6225	3274	4179	Protein of unknown function
AGROCRI.2P.001250.1	2P.scaffold-3050	8088	11716	Protein of unknown function
AGROCRI.2P.001251.1	2P.scaffold-64318	4120	4485	Protein of unknown function
AGROCRI.2P.001252.1	2P.scaffold-64318	4947	6554	Protein of unknown function
AGROCRI.2P.001253.1	2P.scaffold-64318	7715	9308	Protein of unknown function
AGROCRI.2P.001254.1	2P.scaffold-381	949	1491	Peptidyl-prolyl cis-trans isomerase CYP19-3
AGROCRI.2P.001255.1	2P.scaffold-381	3562	8726	Protein of unknown function
AGROCRI.2P.001256.1	2P.scaffold-7651	2749	5565	Proteasome subunit alpha type-6
AGROCRI.2P.001257.1	2P.scaffold-8035	1	4628	Protein of unknown function
AGROCRI.2P.001258.1	2P.scaffold-44944	4734	7582	Protein of unknown function
AGROCRI.2P.001259.1	2P.scaffold-559	12952	15762	DNA repair protein RAD50
AGROCRI.2P.001260.1	2P.scaffold-11692	1	3070	Cyclin-B2-1
AGROCRI.2P.001261.1	2P.scaffold-32990	431	2203	Protein of unknown function
AGROCRI.2P.001262.1	2P.scaffold-32990	3541	4714	Protein of unknown function
AGROCRI.2P.001263.1	2P.scaffold-132305	9483	12633	Protein of unknown function
AGROCRI.2P.001264.1	2P.scaffold-132305	26002	26580	Protein of unknown function
AGROCRI.2P.001265.1	2P.scaffold-4515	1793	5866	Protein of unknown function
AGROCRI.2P.001266.1	2P.scaffold-3268	5777	8652	Protein of unknown function
AGROCRI.2P.001267.1	2P.scaffold-38813	862	1867	Protein of unknown function
AGROCRI.2P.001268.1	2P.scaffold-38813	3115	5885	Protein of unknown function
AGROCRI.2P.001269.1	2P.scaffold-38813	6937	8885	Probable galacturonosyltransferase 10
AGROCRI.2P.001270.1	2P.scaffold-177664	436	4168	Protein of unknown function
AGROCRI.2P.001271.1	2P.scaffold-177664	5224	7205	Protein of unknown function
AGROCRI.2P.001272.1	2P.scaffold-62816	26	1321	Protein of unknown function
AGROCRI.2P.001273.1	2P.scaffold-62816	2479	3651	Protein of unknown function
AGROCRI.2P.001274.1	2P.scaffold-128219	1718	4611	Protein of unknown function
AGROCRI.2P.001275.1	2P.scaffold-128219	4800	6399	Protein of unknown function
AGROCRI.2P.001276.1	2P.scaffold-17610	652	3703	Protein of unknown function
AGROCRI.2P.001277.1	2P.scaffold-2608	442	4500	Protein of unknown function
AGROCRI.2P.001278.1	2P.scaffold-10644	540	1761	Protein of unknown function
AGROCRI.2P.001279.1	2P.scaffold-10644	3314	3849	Protein of unknown function
AGROCRI.2P.001280.1	2P.scaffold-5329	1046	2279	Cadmium-induced protein AS8
AGROCRI.2P.001281.1	2P.scaffold-5329	5684	7641	DEAD-box ATP-dependent RNA helicase 53
AGROCRI.2P.001282.1	2P.scaffold-214881	1	2234	DNA-directed RNA polymerases II and IV subunit 5A
AGROCRI.2P.001283.1	2P.scaffold-214881	4647	10014	Protein of unknown function
AGROCRI.2P.001284.1	2P.scaffold-317	3020	7997	Plant intracellular Ras-group-related LRR protein 7
AGROCRI.2P.001285.1	2P.scaffold-3384	521	4033	Gamma-soluble NSF attachment protein
AGROCRI.2P.001286.1	2P.scaffold-3256	4753	4962	Protein of unknown function
AGROCRI.2P.001287.1	2P.scaffold-3256	5055	7567	Protein of unknown function
AGROCRI.2P.001288.1	2P.scaffold-105743	297	3450	Protein of unknown function
AGROCRI.2P.001289.1	2P.scaffold-6912	1355	2632	Probable cation transporter HKT7
AGROCRI.2P.001290.1	2P.scaffold-6912	3907	6430	Protein of unknown function
AGROCRI.2P.001291.1	2P.scaffold-58412	8683	9869	Protein of unknown function
AGROCRI.2P.001292.1	2P.scaffold-58412	10797	13605	Protein transport protein Sec61 subunit alpha
AGROCRI.2P.001293.1	2P.scaffold-68868	2507	6318	Protein of unknown function
AGROCRI.2P.001294.1	2P.scaffold-204	333	578	Protein of unknown function
AGROCRI.2P.001295.1	2P.scaffold-204	2206	5580	Protein of unknown function
AGROCRI.2P.001296.1	2P.scaffold-3140	8672	13730	Protein of unknown function
AGROCRI.2P.001297.1	2P.scaffold-17738	6084	9981	Protein of unknown function
AGROCRI.2P.001298.1	2P.scaffold-6429	145	2778	Protein of unknown function
AGROCRI.2P.001299.1	2P.scaffold-208704	4790	8763	Protein of unknown function
AGROCRI.2P.001300.1	2P.scaffold-11771	981	5211	Cell division cycle protein 48 homolog
AGROCRI.2P.001301.1	2P.scaffold-215590	6684	10923	Protein of unknown function
AGROCRI.2P.001302.1	2P.scaffold-215590	11935	12476	Protein of unknown function
AGROCRI.2P.001303.1	2P.scaffold-5366	8282	9844	Protein of unknown function
AGROCRI.2P.001304.1	2P.scaffold-5366	10701	13709	Protein of unknown function
AGROCRI.2P.001305.1	2P.scaffold-4276	431	5866	Probable serine/threonine-protein kinase BSK3
AGROCRI.2P.001306.1	2P.scaffold-8306	1129	3777	Boron transporter 4
AGROCRI.2P.001307.1	2P.scaffold-42027	4858	9495	Protein of unknown function
AGROCRI.2P.001308.1	2P.scaffold-7012	637	2874	Protein of unknown function
AGROCRI.2P.001309.1	2P.scaffold-10026	28	2074	Protein of unknown function
AGROCRI.2P.001310.1	2P.scaffold-10026	2499	4918	Protein of unknown function
AGROCRI.2P.001311.1	2P.scaffold-6916	842	5051	Protein of unknown function
AGROCRI.2P.001312.1	2P.scaffold-3084	1062	8496	Probable bifunctional methylthioribulose-1-phosphate dehydratase/enolase-phosphatase E1
AGROCRI.2P.001313.1	2P.scaffold-11822	750	4018	1
AGROCRI.2P.001314.1	2P.scaffold-213890	1	3930	Protein of unknown function
AGROCRI.2P.001315.1	2P.scaffold-136629	1229	4014	Protein of unknown function
AGROCRI.2P.001316.1	2P.scaffold-3558	3275	5535	Protein of unknown function
AGROCRI.2P.001317.1	2P.scaffold-1702	2	2151	Glutamine--tRNA ligase
AGROCRI.2P.001318.1	2P.scaffold-191076	211	4774	Protein of unknown function
AGROCRI.2P.001319.1	2P.scaffold-3191	2316	4602	Protein FATTY ACID EXPORT 2
AGROCRI.2P.001320.1	2P.scaffold-3191	5739	10867	Protein TIFY 3
AGROCRI.2P.001321.1	2P.scaffold-4069	3392	7713	Exocyst complex component EXO70A1
AGROCRI.2P.001322.1	2P.scaffold-4715	1104	4002	Alanine--glyoxylate aminotransferase 2 homolog 1
AGROCRI.2P.001323.1	2P.scaffold-5219	3504	4280	Protein of unknown function
AGROCRI.2P.001324.1	2P.scaffold-5219	6501	9123	Protein of unknown function
AGROCRI.2P.001325.1	2P.scaffold-42889	7594	11014	O-fucosyltransferase 6
AGROCRI.2P.001326.1	2P.scaffold-82198	3152	4065	Protein of unknown function
AGROCRI.2P.001327.1	2P.scaffold-82198	4889	13562	Protein of unknown function
AGROCRI.2P.001328.1	2P.scaffold-82198	15695	16552	Protein of unknown function
AGROCRI.2P.001329.1	2P.scaffold-12290	57	3861	Protein of unknown function
AGROCRI.2P.001330.1	2P.scaffold-152386	460	3242	Protein of unknown function
AGROCRI.2P.001331.1	2P.scaffold-152386	4997	5985	Flavonoid 3'-monooxygenase CYP75B3
AGROCRI.2P.001332.1	2P.scaffold-10907	13151	18855	Protein of unknown function
AGROCRI.2P.001333.1	2P.scaffold-4647	47	4349	Protein of unknown function
AGROCRI.2P.001334.1	2P.scaffold-10331	2474	4852	Protein of unknown function
AGROCRI.2P.001335.1	2P.scaffold-5156	1	1401	Protein of unknown function
AGROCRI.2P.001336.1	2P.scaffold-5156	2110	4677	Protein of unknown function
AGROCRI.2P.001337.1	2P.scaffold-3134	1164	3926	Protein of unknown function
AGROCRI.2P.001338.1	2P.scaffold-3134	10160	12125	Protein of unknown function
AGROCRI.2P.001339.1	2P.scaffold-3060	2554	3306	Protein of unknown function
AGROCRI.2P.001340.1	2P.scaffold-3060	5261	5629	Protein of unknown function
AGROCRI.2P.001341.1	2P.scaffold-3060	6849	8679	Protein of unknown function
AGROCRI.2P.001342.1	2P.scaffold-204456	2	5126	Protein of unknown function
AGROCRI.2P.001343.1	2P.scaffold-4912	2358	4255	Protein of unknown function
AGROCRI.2P.001344.1	2P.scaffold-4912	7303	7743	Protein of unknown function
AGROCRI.2P.001345.1	2P.scaffold-12912	386	4422	Putative chloride channel-like protein CLC-g
AGROCRI.2P.001346.1	2P.scaffold-12912	9119	9551	Protein of unknown function
AGROCRI.2P.001347.1	2P.scaffold-40484	282	1313	Protein of unknown function
AGROCRI.2P.001348.1	2P.scaffold-40484	1715	3131	Protein of unknown function
AGROCRI.2P.001349.1	2P.scaffold-17951	253	3829	Protein of unknown function
AGROCRI.2P.001350.1	2P.scaffold-5346	1966	5448	Protein of unknown function
AGROCRI.2P.001351.1	2P.scaffold-215644	256	1113	Protein of unknown function
AGROCRI.2P.001352.1	2P.scaffold-215644	2548	2820	Protein of unknown function
AGROCRI.2P.001353.1	2P.scaffold-215644	11009	12494	Protein of unknown function
AGROCRI.2P.001354.1	2P.scaffold-30590	224	1310	Protein of unknown function
AGROCRI.2P.001355.1	2P.scaffold-30590	1621	3065	Protein of unknown function
AGROCRI.2P.001356.1	2P.scaffold-4095	1048	9072	Protein of unknown function
AGROCRI.2P.001357.1	2P.scaffold-214508	2026	3852	Expansin-B7
AGROCRI.2P.001358.1	2P.scaffold-214508	5410	8050	Protein of unknown function
AGROCRI.2P.001359.1	2P.scaffold-8524	3697	5825	Protein of unknown function
AGROCRI.2P.001360.1	2P.scaffold-8524	9213	12930	Protein of unknown function
AGROCRI.2P.001361.1	2P.scaffold-214566	996	3995	Protein of unknown function
AGROCRI.2P.001362.1	2P.scaffold-215703	14824	17690	Protein of unknown function
AGROCRI.2P.001363.1	2P.scaffold-215703	20504	21143	Protein of unknown function
AGROCRI.2P.001364.1	2P.scaffold-5364	19	1656	Protein of unknown function
AGROCRI.2P.001365.1	2P.scaffold-5364	2764	3132	Protein of unknown function
AGROCRI.2P.001366.1	2P.scaffold-29730	80	2056	Protein of unknown function
AGROCRI.2P.001367.1	2P.scaffold-29730	2605	4809	Protein of unknown function
AGROCRI.2P.001368.1	2P.scaffold-4536	3232	5483	Protein of unknown function
AGROCRI.2P.001369.1	2P.scaffold-109611	2320	4402	Protein of unknown function
AGROCRI.2P.001370.1	2P.scaffold-8060	2	2711	Homeobox-leucine zipper protein HOX10
AGROCRI.2P.001371.1	2P.scaffold-189524	994	4647	Protein of unknown function
AGROCRI.2P.001372.1	2P.scaffold-21417	2	5266	Protein of unknown function
AGROCRI.2P.001373.1	2P.scaffold-210094	74	2169	Protein of unknown function
AGROCRI.2P.001374.1	2P.scaffold-210094	3323	5582	Protein of unknown function
AGROCRI.2P.001375.1	2P.scaffold-12326	4241	5589	Protein of unknown function
AGROCRI.2P.001376.1	2P.scaffold-12326	6236	7464	Protein of unknown function
AGROCRI.2P.001377.1	2P.scaffold-51	754	7986	Protein of unknown function
AGROCRI.2P.001378.1	2P.scaffold-4794	1622	6000	Protein of unknown function
AGROCRI.2P.001379.1	2P.scaffold-4786	14903	21014	Protein of unknown function
AGROCRI.2P.001380.1	2P.scaffold-14697	3	344	Protein of unknown function
AGROCRI.2P.001381.1	2P.scaffold-14697	1004	3062	Protein of unknown function
AGROCRI.2P.001382.1	2P.scaffold-3524	1222	5089	Protein of unknown function
AGROCRI.2P.001383.1	2P.scaffold-3524	6857	7159	Protein of unknown function
AGROCRI.2P.001384.1	2P.scaffold-212938	959	4526	Cytochrome P450 72A11
AGROCRI.2P.001385.1	2P.scaffold-58702	2848	7408	Protein of unknown function
AGROCRI.2P.001386.1	2P.scaffold-4543	2764	5572	Protein of unknown function
AGROCRI.2P.001387.1	2P.scaffold-62373	654	3030	Protein of unknown function
AGROCRI.2P.001388.1	2P.scaffold-62373	3465	4055	Protein of unknown function
AGROCRI.2P.001389.1	2P.scaffold-17236	7041	8740	Protein of unknown function
AGROCRI.2P.001390.1	2P.scaffold-17236	16524	16940	Protein of unknown function
AGROCRI.2P.001391.1	2P.scaffold-6085	1500	2000	Protein of unknown function
AGROCRI.2P.001392.1	2P.scaffold-6085	2798	7564	Protein of unknown function
AGROCRI.2P.001393.1	2P.scaffold-6631	314	715	Protein of unknown function
AGROCRI.2P.001394.1	2P.scaffold-6631	3938	7135	Dolichyl-diphosphooligosaccharide--protein glycosyltransferase subunit 1B
AGROCRI.2P.001395.1	2P.scaffold-5665	283	4092	Protein of unknown function
AGROCRI.2P.001396.1	2P.scaffold-212739	6357	6776	Protein of unknown function
AGROCRI.2P.001397.1	2P.scaffold-212739	8969	11121	Protein of unknown function
AGROCRI.2P.001398.1	2P.scaffold-9892	16047	18283	Protein DETOXIFICATION 16
AGROCRI.2P.001399.1	2P.scaffold-2988	1709	7292	MADS-box transcription factor 15
AGROCRI.2P.001400.1	2P.scaffold-45769	40	1296	Protein of unknown function
AGROCRI.2P.001401.1	2P.scaffold-45769	1670	5167	Protein of unknown function
AGROCRI.2P.001402.1	2P.scaffold-8064	1046	4020	Probable magnesium transporter NIPA4
AGROCRI.2P.001403.1	2P.scaffold-56242	113	3268	Protein of unknown function
AGROCRI.2P.001404.1	2P.scaffold-73169	573	3708	Protein of unknown function
AGROCRI.2P.001405.1	2P.scaffold-73169	3800	4381	Protein of unknown function
AGROCRI.2P.001406.1	2P.scaffold-41268	1176	3163	Protein of unknown function
AGROCRI.2P.001407.1	2P.scaffold-41268	5812	6312	Protein of unknown function
AGROCRI.2P.001408.1	2P.scaffold-26877	581	1805	Protein of unknown function
AGROCRI.2P.001409.1	2P.scaffold-26877	3492	4878	Protein of unknown function
AGROCRI.2P.001410.1	2P.scaffold-7802	4437	4941	Protein of unknown function
AGROCRI.2P.001411.1	2P.scaffold-7802	5501	8936	Protein of unknown function
AGROCRI.2P.001412.1	2P.scaffold-5140	3	1623	Protein of unknown function
AGROCRI.2P.001413.1	2P.scaffold-5140	6174	6461	Protein of unknown function
AGROCRI.2P.001414.1	2P.scaffold-5140	10024	11544	Protein of unknown function
AGROCRI.2P.001415.1	2P.scaffold-12324	1179	5576	Protein of unknown function
AGROCRI.2P.001416.1	2P.scaffold-297	2666	2995	Protein of unknown function
AGROCRI.2P.001417.1	2P.scaffold-297	5543	8337	Protein of unknown function
AGROCRI.2P.001418.1	2P.scaffold-111611	894	2396	Protein of unknown function
AGROCRI.2P.001419.1	2P.scaffold-111611	2397	3044	Protein of unknown function
AGROCRI.2P.001420.1	2P.scaffold-62970	432	2044	Casein kinase 1-like protein 1
AGROCRI.2P.001421.1	2P.scaffold-19122	891	4058	Protein of unknown function
AGROCRI.2P.001422.1	2P.scaffold-15328	110	3061	Acetyl-coenzyme A synthetase
AGROCRI.2P.001423.1	2P.scaffold-214303	41	4113	Protein of unknown function
AGROCRI.2P.001424.1	2P.scaffold-214303	6001	7268	Protein of unknown function
AGROCRI.2P.001425.1	2P.scaffold-35884	3133	4778	AP2-like ethylene-responsive transcription factor At1g16060
AGROCRI.2P.001426.1	2P.scaffold-35884	5829	6431	Protein of unknown function
AGROCRI.2P.001427.1	2P.scaffold-215323	8920	9802	Protein of unknown function
AGROCRI.2P.001428.1	2P.scaffold-215323	10393	10647	Protein of unknown function
AGROCRI.2P.001429.1	2P.scaffold-215387	1541	3566	Protein of unknown function
AGROCRI.2P.001430.1	2P.scaffold-91054	4457	4675	Protein of unknown function
AGROCRI.2P.001431.1	2P.scaffold-91054	5321	10741	Protein of unknown function
AGROCRI.2P.001432.1	2P.scaffold-214754	3	3797	Auxin response factor 11
AGROCRI.2P.001433.1	2P.scaffold-3487	1778	7017	Protein of unknown function
AGROCRI.2P.001434.1	2P.scaffold-3487	8329	8900	Protein of unknown function
AGROCRI.2P.001435.1	2P.scaffold-26049	181	4310	Vacuolar protein sorting-associated protein 45 homolog
AGROCRI.2P.001436.1	2P.scaffold-163955	1214	3453	Protein of unknown function
AGROCRI.2P.001437.1	2P.scaffold-6748	388	1841	Protein of unknown function
AGROCRI.2P.001438.1	2P.scaffold-6748	2384	3172	Protein of unknown function
AGROCRI.2P.001439.1	2P.scaffold-14088	3673	10650	Protein of unknown function
AGROCRI.2P.001440.1	2P.scaffold-14088	15048	15602	Protein of unknown function
AGROCRI.2P.001441.1	2P.scaffold-6250	801	3901	DExH-box ATP-dependent RNA helicase DExH7
AGROCRI.2P.001442.1	2P.scaffold-65690	325	3077	Protein of unknown function
AGROCRI.2P.001443.1	2P.scaffold-5590	1384	2336	Protein of unknown function
AGROCRI.2P.001444.1	2P.scaffold-5590	3464	5702	Protein of unknown function
AGROCRI.2P.001445.1	2P.scaffold-214751	3006	7394	Protein of unknown function
AGROCRI.2P.001446.1	2P.scaffold-3464	447	2756	Protein of unknown function
AGROCRI.2P.001447.1	2P.scaffold-3464	6747	7064	Protein of unknown function
AGROCRI.2P.001448.1	2P.scaffold-3464	7591	7989	Protein of unknown function
AGROCRI.2P.001449.1	2P.scaffold-128090	6914	8055	Protein of unknown function
AGROCRI.2P.001450.1	2P.scaffold-128090	9237	11350	Protein of unknown function
AGROCRI.2P.001451.1	2P.scaffold-11168	2947	3832	Protein of unknown function
AGROCRI.2P.001452.1	2P.scaffold-11168	3875	4367	Protein of unknown function
AGROCRI.2P.001453.1	2P.scaffold-17606	748	1230	Protein of unknown function
AGROCRI.2P.001454.1	2P.scaffold-17606	1917	4276	Protein of unknown function
AGROCRI.2P.001455.1	2P.scaffold-25428	13	355	Protein of unknown function
AGROCRI.2P.001456.1	2P.scaffold-25428	947	2448	Protein of unknown function
AGROCRI.2P.001457.1	2P.scaffold-3577	79	1461	Protein of unknown function
AGROCRI.2P.001458.1	2P.scaffold-3577	4976	10040	Vacuolar protein-sorting-associated protein 11 homolog
AGROCRI.2P.001459.1	2P.scaffold-5781	1	2788	Ultraviolet-B receptor UVR8
AGROCRI.2P.001460.1	2P.scaffold-8540	204	3430	DNA (cytosine-5)-methyltransferase DRM2
AGROCRI.2P.001461.1	2P.scaffold-8540	7854	8597	Protein of unknown function
AGROCRI.2P.001462.1	2P.scaffold-8468	2946	7138	Protein of unknown function
AGROCRI.2P.001463.1	2P.scaffold-8468	8204	10497	Protein of unknown function
AGROCRI.2P.001464.1	2P.scaffold-214187	2320	3713	Protein of unknown function
AGROCRI.2P.001465.1	2P.scaffold-214187	4776	8026	Protein of unknown function
AGROCRI.2P.001466.1	2P.scaffold-26982	3940	8735	Protein of unknown function
AGROCRI.2P.001467.1	2P.scaffold-9352	328	2501	ATPase 10
AGROCRI.2P.001468.1	2P.scaffold-39559	298	2967	Ent-copalyl diphosphate synthase 2
AGROCRI.2P.001469.1	2P.scaffold-14364	345	4162	Putative glucose-6-phosphate 1-epimerase
AGROCRI.2P.001470.1	2P.scaffold-87743	1127	6174	Protein of unknown function
AGROCRI.2P.001471.1	2P.scaffold-17513	568	3739	Protein of unknown function
AGROCRI.2P.001472.1	2P.scaffold-17513	1889	3799	Protein of unknown function
AGROCRI.2P.001473.1	2P.scaffold-45	1771	1974	Protein of unknown function
AGROCRI.2P.001474.1	2P.scaffold-45	1999	2325	Protein of unknown function
AGROCRI.2P.001475.1	2P.scaffold-45	7933	9129	Protein of unknown function
AGROCRI.2P.001476.1	2P.scaffold-58759	862	1854	Protein of unknown function
AGROCRI.2P.001477.1	2P.scaffold-58759	2524	3341	Protein of unknown function
AGROCRI.2P.001478.1	2P.scaffold-58759	3942	4430	Protein of unknown function
AGROCRI.2P.001479.1	2P.scaffold-21007	583	1929	Protein of unknown function
AGROCRI.2P.001480.1	2P.scaffold-21007	1936	2987	Protein of unknown function
AGROCRI.2P.001481.1	2P.scaffold-3272	6300	6719	Protein of unknown function
AGROCRI.2P.001482.1	2P.scaffold-3272	13587	17906	Protein of unknown function
AGROCRI.2P.001483.1	2P.scaffold-5831	3811	4246	Protein LAZ1
AGROCRI.2P.001484.1	2P.scaffold-5831	6660	8177	Protein of unknown function
AGROCRI.2P.001485.1	2P.scaffold-215628	11341	16390	Protein of unknown function
AGROCRI.2P.001486.1	2P.scaffold-12353	1074	2686	Protein of unknown function
AGROCRI.2P.001487.1	2P.scaffold-12353	6763	7480	Protein of unknown function
AGROCRI.2P.001488.1	2P.scaffold-215857	4308	7217	Protein of unknown function
AGROCRI.2P.001489.1	2P.scaffold-850	261	2991	Protein of unknown function
AGROCRI.2P.001490.1	2P.scaffold-850	4700	5113	Protein of unknown function
AGROCRI.2P.001491.1	2P.scaffold-850	6635	7053	Protein of unknown function
AGROCRI.2P.001492.1	2P.scaffold-2039	435	1401	Nuclear/nucleolar GTPase 2
AGROCRI.2P.001493.1	2P.scaffold-2039	3940	4871	Protein of unknown function
AGROCRI.2P.001494.1	2P.scaffold-4418	2084	6555	DEAD-box ATP-dependent RNA helicase 8
AGROCRI.2P.001495.1	2P.scaffold-16811	140	2940	Protein of unknown function
AGROCRI.2P.001496.1	2P.scaffold-214284	1456	4275	Protein of unknown function
AGROCRI.2P.001497.1	2P.scaffold-215109	2195	5799	Protein of unknown function
AGROCRI.2P.001498.1	2P.scaffold-3583	1155	4705	Protein of unknown function
AGROCRI.2P.001499.1	2P.scaffold-215672	3481	8082	Abscisic acid-inducible protein kinase (Fragment)
AGROCRI.2P.001500.1	2P.scaffold-8312	1069	2975	Soluble starch synthase 3
AGROCRI.2P.001501.1	2P.scaffold-3303	7417	11525	Alanine--tRNA ligase
AGROCRI.2P.001502.1	2P.scaffold-3623	1155	3585	Protein of unknown function
AGROCRI.2P.001503.1	2P.scaffold-3623	5825	6385	Protein of unknown function
AGROCRI.2P.001504.1	2P.scaffold-3456	8198	11841	Protein of unknown function
AGROCRI.2P.001505.1	2P.scaffold-3649	8803	11728	Protein of unknown function
AGROCRI.2P.001506.1	2P.scaffold-31809	4434	5529	Protein of unknown function
AGROCRI.2P.001507.1	2P.scaffold-31809	7194	9452	Protein of unknown function
AGROCRI.2P.001508.1	2P.scaffold-7718	1064	2767	Protein of unknown function
AGROCRI.2P.001509.1	2P.scaffold-7718	6152	7354	Protein of unknown function
AGROCRI.2P.001510.1	2P.scaffold-7007	533	3911	Protein of unknown function
AGROCRI.2P.001511.1	2P.scaffold-43967	2169	2597	Protein of unknown function
AGROCRI.2P.001512.1	2P.scaffold-43967	3162	4394	Protein of unknown function
AGROCRI.2P.001513.1	2P.scaffold-3024	6523	9390	Hypersensitive-induced response protein 1
AGROCRI.2P.001514.1	2P.scaffold-3024	10145	10549	Protein of unknown function
AGROCRI.2P.001515.1	2P.scaffold-3586	6537	8396	Protein of unknown function
AGROCRI.2P.001516.1	2P.scaffold-3586	8547	9839	Protein of unknown function
AGROCRI.2P.001517.1	2P.scaffold-6714	292	5520	Protein of unknown function
AGROCRI.2P.001518.1	2P.scaffold-5713	1	279	Protein of unknown function
AGROCRI.2P.001519.1	2P.scaffold-5713	2547	2879	Protein of unknown function
AGROCRI.2P.001520.1	2P.scaffold-5713	5581	7410	Protein of unknown function
AGROCRI.2P.001521.1	2P.scaffold-4990	100	1630	Protein of unknown function
AGROCRI.2P.001522.1	2P.scaffold-4990	3042	4606	Protein of unknown function
AGROCRI.2P.001523.1	2P.scaffold-3136	577	3630	Protein of unknown function
AGROCRI.2P.001524.1	2P.scaffold-3136	11901	12293	Protein of unknown function
AGROCRI.2P.001525.1	2P.scaffold-3568	3976	7220	Protein of unknown function
AGROCRI.2P.001526.1	2P.scaffold-5082	1621	4009	Protein of unknown function
AGROCRI.2P.001527.1	2P.scaffold-3989	3197	6597	DEAD-box ATP-dependent RNA helicase 32
AGROCRI.2P.001528.1	2P.scaffold-8625	3552	8046	Protein of unknown function
AGROCRI.2P.001529.1	2P.scaffold-8625	9373	10227	Protein of unknown function
AGROCRI.2P.001530.1	2P.scaffold-214668	374	854	Protein of unknown function
AGROCRI.2P.001531.1	2P.scaffold-214668	4735	6447	Protein of unknown function
AGROCRI.2P.001532.1	2P.scaffold-1117	8111	8647	Protein of unknown function
AGROCRI.2P.001533.1	2P.scaffold-1117	11077	13198	Adenylyl-sulfate kinase 3
AGROCRI.2P.001534.1	2P.scaffold-5740	617	3517	Ribulose-phosphate 3-epimerase
AGROCRI.2P.001535.1	2P.scaffold-3605	1443	7388	Protein of unknown function
AGROCRI.2P.001536.1	2P.scaffold-3512	1	3524	Protein of unknown function
AGROCRI.2P.001537.1	2P.scaffold-18008	103	2075	Probable low-specificity L-threonine aldolase 1
AGROCRI.2P.001538.1	2P.scaffold-67017	266	3482	Protein of unknown function
AGROCRI.2P.001539.1	2P.scaffold-6673	450	4805	Dihydrolipoyllysine-residue acetyltransferase component 5 of pyruvate dehydrogenase complex
AGROCRI.2P.001540.1	2P.scaffold-3655	1404	5811	Aminotransferase ALD1 homolog
AGROCRI.2P.001541.1	2P.scaffold-6005	568	5311	Protein of unknown function
AGROCRI.2P.001542.1	2P.scaffold-3576	1260	4271	Oligoribonuclease
AGROCRI.2P.001543.1	2P.scaffold-3576	4723	5849	Oligoribonuclease
AGROCRI.2P.001544.1	2P.scaffold-4770	4028	7998	Protein of unknown function
AGROCRI.2P.001545.1	2P.scaffold-1775	2368	6744	Protein of unknown function
AGROCRI.2P.001546.1	2P.scaffold-214605	9041	12558	Probable magnesium transporter NIPA4
AGROCRI.2P.001547.1	2P.scaffold-15371	493	3290	Probable polyribonucleotide nucleotidyltransferase 1
AGROCRI.2P.001548.1	2P.scaffold-4206	2062	4821	COP9 signalosome complex subunit 7
AGROCRI.2P.001549.1	2P.scaffold-1688	833	6166	Protein of unknown function
AGROCRI.2P.001550.1	2P.scaffold-215473	1293	3170	Protein of unknown function
AGROCRI.2P.001551.1	2P.scaffold-11112	4726	6808	Protein of unknown function
AGROCRI.2P.001552.1	2P.scaffold-29018	11111	13740	Protein RETICULATA
AGROCRI.2P.001553.1	2P.scaffold-135061	69	2836	Dol-P-Man:Man(7)GlcNAc(2)-PP-Dol alpha-1
AGROCRI.2P.001554.1	2P.scaffold-17555	178	3739	Protein of unknown function
AGROCRI.2P.001555.1	2P.scaffold-17555	4190	4522	Protein of unknown function
AGROCRI.2P.001556.1	2P.scaffold-17555	5004	6056	Protein of unknown function
AGROCRI.2P.001557.1	2P.scaffold-215569	703	3652	Protein of unknown function
AGROCRI.2P.001558.1	2P.scaffold-3626	7323	12414	Probable staphylococcal-like nuclease CAN2
AGROCRI.2P.001559.1	2P.scaffold-89290	1333	1872	Protein of unknown function
AGROCRI.2P.001560.1	2P.scaffold-89290	4159	7378	Protein of unknown function
AGROCRI.2P.001561.1	2P.scaffold-17515	1	1780	AP-2 complex subunit alpha-1
AGROCRI.2P.001562.1	2P.scaffold-112300	13585	13986	Protein of unknown function
AGROCRI.2P.001563.1	2P.scaffold-112300	18240	19741	Probable E3 ubiquitin-protein ligase ARI8
AGROCRI.2P.001564.1	2P.scaffold-3107	3986	5810	Protein of unknown function
AGROCRI.2P.001565.1	2P.scaffold-3107	10250	10531	Protein of unknown function
AGROCRI.2P.001566.1	2P.scaffold-4137	202	1200	Protein of unknown function
AGROCRI.2P.001567.1	2P.scaffold-4137	1612	3112	Protein of unknown function
AGROCRI.2P.001568.1	2P.scaffold-110252	3362	8632	Protein of unknown function
AGROCRI.2P.001569.1	2P.scaffold-3454	1862	4801	Protein of unknown function
AGROCRI.2P.001570.1	2P.scaffold-3047	1546	5972	Protein of unknown function
AGROCRI.2P.001571.1	2P.scaffold-206098	3463	4313	Protein of unknown function
AGROCRI.2P.001572.1	2P.scaffold-206098	5347	8009	Protein of unknown function
AGROCRI.2P.001573.1	2P.scaffold-3333	8822	12207	Protein of unknown function
AGROCRI.2P.001574.1	2P.scaffold-3362	3672	7523	Protein of unknown function
AGROCRI.2P.001575.1	2P.scaffold-6295	523	4716	Protein of unknown function
AGROCRI.2P.001576.1	2P.scaffold-7044	435	4339	Protein LAZ1
AGROCRI.2P.001577.1	2P.scaffold-13311	3010	3887	Protein of unknown function
AGROCRI.2P.001578.1	2P.scaffold-13311	4229	9157	Protein of unknown function
AGROCRI.2P.001579.1	2P.scaffold-5865	414	2430	Protein of unknown function
AGROCRI.2P.001580.1	2P.scaffold-3203	514	7007	Protein of unknown function
AGROCRI.2P.001581.1	2P.scaffold-4335	452	5331	Protein ARABIDILLO 1
AGROCRI.2P.001582.1	2P.scaffold-12361	701	4911	Protein of unknown function
AGROCRI.2P.001583.1	2P.scaffold-6774	201	1567	Protein of unknown function
AGROCRI.2P.001584.1	2P.scaffold-6774	2290	3699	Protein of unknown function
AGROCRI.2P.001585.1	2P.scaffold-3574	2286	4474	Protein of unknown function
AGROCRI.2P.001586.1	2P.scaffold-3574	4720	5112	Protein of unknown function
AGROCRI.2P.001587.1	2P.scaffold-33751	5058	7993	Callose synthase 5
AGROCRI.2P.001588.1	2P.scaffold-33751	13638	15116	ATP synthase subunit alpha
AGROCRI.2P.001589.1	2P.scaffold-214851	2	4288	Protein of unknown function
AGROCRI.2P.001590.1	2P.scaffold-38858	1300	3912	Protein of unknown function
AGROCRI.2P.001591.1	2P.scaffold-7658	1	2683	Peptide-N(4)-(N-acetyl-beta-glucosaminyl)asparagine amidase
AGROCRI.2P.001592.1	2P.scaffold-125473	1	1227	CBL-interacting protein kinase 23
AGROCRI.2P.001593.1	2P.scaffold-3156	182	6867	Protein of unknown function
AGROCRI.2P.001594.1	2P.scaffold-12437	2269	4246	Lysine histidine transporter 1
AGROCRI.2P.001595.1	2P.scaffold-214089	208	3804	Protein of unknown function
AGROCRI.2P.001596.1	2P.scaffold-119	4676	7168	3-oxoacyl-[acyl-carrier-protein] reductase
AGROCRI.2P.001597.1	2P.scaffold-214395	3863	4679	Protein of unknown function
AGROCRI.2P.001598.1	2P.scaffold-214395	6660	8841	Protein of unknown function
AGROCRI.2P.001599.1	2P.scaffold-214666	2	1340	Protein of unknown function
AGROCRI.2P.001600.1	2P.scaffold-214666	5636	7820	Protein of unknown function
AGROCRI.2P.001601.1	2P.scaffold-3143	1957	5006	Probable D-2-hydroxyglutarate dehydrogenase
AGROCRI.2P.001602.1	2P.scaffold-122025	3	2061	Protein of unknown function
AGROCRI.2P.001603.1	2P.scaffold-211656	6730	10617	Protein of unknown function
AGROCRI.2P.001604.1	2P.scaffold-9726	143	2634	Protein of unknown function
AGROCRI.2P.001605.1	2P.scaffold-3474	6016	8041	Protein of unknown function
AGROCRI.2P.001606.1	2P.scaffold-4429	1725	5606	Protein DJ-1 homolog D
AGROCRI.2P.001607.1	2P.scaffold-4429	6944	8169	Zinc finger CCCH domain-containing protein 32
AGROCRI.2P.001608.1	2P.scaffold-34978	932	2785	Protein of unknown function
AGROCRI.2P.001609.1	2P.scaffold-34978	3072	4382	Putative alpha-L-fucosidase 1
AGROCRI.2P.001610.1	2P.scaffold-5174	3051	8552	10 kDa chaperonin
AGROCRI.2P.001611.1	2P.scaffold-3679	1	2181	G-type lectin S-receptor-like serine/threonine-protein kinase B120
AGROCRI.2P.001612.1	2P.scaffold-214409	160	2119	Protein of unknown function
AGROCRI.2P.001613.1	2P.scaffold-214409	7850	10041	Protein of unknown function
AGROCRI.2P.001614.1	2P.scaffold-21619	13360	17722	Protein of unknown function
AGROCRI.2P.001615.1	2P.scaffold-214684	6283	9886	Protein of unknown function
AGROCRI.2P.001616.1	2P.scaffold-2939	1624	4427	Transcription factor ICE1
AGROCRI.2P.001617.1	2P.scaffold-2939	7809	8318	Protein of unknown function
AGROCRI.2P.001618.1	2P.scaffold-2939	11380	12345	Protein of unknown function
AGROCRI.2P.001619.1	2P.scaffold-6144	1421	3869	Protein of unknown function
AGROCRI.2P.001620.1	2P.scaffold-7280	172	2473	Protein of unknown function
AGROCRI.2P.001621.1	2P.scaffold-3896	2273	5207	Protein of unknown function
AGROCRI.2P.001622.1	2P.scaffold-111240	915	3720	Protein of unknown function
AGROCRI.2P.001623.1	2P.scaffold-38957	4343	6123	Anamorsin homolog 1
AGROCRI.2P.001624.1	2P.scaffold-63507	45	4579	Protein of unknown function
AGROCRI.2P.001625.1	2P.scaffold-4094	29	6894	Protein of unknown function
AGROCRI.2P.001626.1	2P.scaffold-143423	359	3522	Protein of unknown function
AGROCRI.2P.001627.1	2P.scaffold-8135	122	766	Protein of unknown function
AGROCRI.2P.001628.1	2P.scaffold-8135	2110	5472	Protein of unknown function
AGROCRI.2P.001629.1	2P.scaffold-4147	2720	5403	Proline transporter 1
AGROCRI.2P.001630.1	2P.scaffold-3239	1663	9732	Protein of unknown function
AGROCRI.2P.001631.1	2P.scaffold-3194	534	2343	Protein FIZZY-RELATED 2
AGROCRI.2P.001632.1	2P.scaffold-5077	297	3916	Protein of unknown function
AGROCRI.2P.001633.1	2P.scaffold-14485	27	1838	Serine/threonine-protein kinase svkA
AGROCRI.2P.001634.1	2P.scaffold-9255	3371	5597	Protein of unknown function
AGROCRI.2P.001635.1	2P.scaffold-212460	1488	1844	Protein of unknown function
AGROCRI.2P.001636.1	2P.scaffold-212460	3766	5167	Protein of unknown function
AGROCRI.2P.001637.1	2P.scaffold-3396	644	5878	Protein of unknown function
AGROCRI.2P.001638.1	2P.scaffold-10053	468	2383	Protein of unknown function
AGROCRI.2P.001639.1	2P.scaffold-9864	721	1596	Protein of unknown function
AGROCRI.2P.001640.1	2P.scaffold-9864	5634	9858	Protein of unknown function
AGROCRI.2P.001641.1	2P.scaffold-3195	3961	7825	Protein of unknown function
AGROCRI.2P.001642.1	2P.scaffold-215334	51	2065	Protein of unknown function
AGROCRI.2P.001643.1	2P.scaffold-215334	3458	6379	Protein of unknown function
AGROCRI.2P.001644.1	2P.scaffold-10027	1	1116	Protein of unknown function
AGROCRI.2P.001645.1	2P.scaffold-10027	2276	2650	Protein of unknown function
AGROCRI.2P.001646.1	2P.scaffold-11040	3318	4775	Cyclin-dependent kinase G-2
AGROCRI.2P.001647.1	2P.scaffold-6718	2558	5822	Protein of unknown function
AGROCRI.2P.001648.1	2P.scaffold-58027	269	584	Protein of unknown function
AGROCRI.2P.001649.1	2P.scaffold-58027	1099	3746	Protein of unknown function
AGROCRI.2P.001650.1	2P.scaffold-17409	9429	14709	Protein of unknown function
AGROCRI.2P.001651.1	2P.scaffold-5504	1056	4651	Protein of unknown function
AGROCRI.2P.001652.1	2P.scaffold-5864	1033	3685	Protein of unknown function
AGROCRI.2P.001653.1	2P.scaffold-109437	2	556	Protein of unknown function
AGROCRI.2P.001654.1	2P.scaffold-109437	584	1711	Protein of unknown function
AGROCRI.2P.001655.1	2P.scaffold-5139	105	1896	Protein of unknown function
AGROCRI.2P.001656.1	2P.scaffold-22640	3	92	Protein of unknown function
AGROCRI.2P.001657.1	2P.scaffold-22640	298	3769	Protein of unknown function
AGROCRI.2P.001658.1	2P.scaffold-15386	14	2189	15-cis-phytoene desaturase
AGROCRI.2P.001659.1	2P.scaffold-10819	59	1957	Protein of unknown function
AGROCRI.2P.001660.1	2P.scaffold-3262	1	351	Probable metal-nicotianamine transporter YSL11
AGROCRI.2P.001661.1	2P.scaffold-3262	804	2031	Protein of unknown function
AGROCRI.2P.001662.1	2P.scaffold-3262	3793	5274	Protein of unknown function
AGROCRI.2P.001663.1	2P.scaffold-215479	6565	13665	Protein of unknown function
AGROCRI.2P.001664.1	2P.scaffold-3606	3281	7929	Cyclin-B1-2
AGROCRI.2P.001665.1	2P.scaffold-3606	9649	10523	Protein of unknown function
AGROCRI.2P.001666.1	2P.scaffold-35929	24	3667	Protein of unknown function
AGROCRI.2P.001667.1	2P.scaffold-69137	371	2828	Protein of unknown function
AGROCRI.2P.001668.1	2P.scaffold-69137	3638	4156	Protein of unknown function
AGROCRI.2P.001669.1	2P.scaffold-135436	1536	3062	Photosystem II CP47 reaction center protein
AGROCRI.2P.001670.1	2P.scaffold-135436	6003	8506	DNA-directed RNA polymerase subunit alpha
AGROCRI.2P.001671.1	2P.scaffold-64630	4202	4528	ATP synthase subunit alpha
AGROCRI.2P.001672.1	2P.scaffold-64630	10176	13111	Protein of unknown function
AGROCRI.2P.001673.1	2P.scaffold-48	5895	6128	Protein of unknown function
AGROCRI.2P.001674.1	2P.scaffold-48	13417	16938	Protein of unknown function
AGROCRI.2P.001675.1	2P.scaffold-7405	5484	9309	Protein of unknown function
AGROCRI.2P.001676.1	2P.scaffold-8358	461	4945	Protein of unknown function
AGROCRI.2P.001677.1	2P.scaffold-3628	4421	4741	Protein of unknown function
AGROCRI.2P.001678.1	2P.scaffold-3628	9337	10306	Cytochrome c6
AGROCRI.2P.001679.1	2P.scaffold-104551	609	2346	Protein of unknown function
AGROCRI.2P.001680.1	2P.scaffold-193	5151	9384	Protein of unknown function
AGROCRI.2P.001681.1	2P.scaffold-44678	805	3993	Protein of unknown function
AGROCRI.2P.001682.1	2P.scaffold-5296	1	3131	Uncharacterized Rho GTPase-activating protein At5g61530
AGROCRI.2P.001683.1	2P.scaffold-3243	3098	8005	Protein of unknown function
AGROCRI.2P.001684.1	2P.scaffold-15106	131	166	Protein of unknown function
AGROCRI.2P.001685.1	2P.scaffold-15106	482	1883	Amidase 1
AGROCRI.2P.001686.1	2P.scaffold-8206	5019	5351	Protein of unknown function
AGROCRI.2P.001687.1	2P.scaffold-8206	5908	7811	Protein of unknown function
AGROCRI.2P.001688.1	2P.scaffold-9462	413	3222	Protein of unknown function
AGROCRI.2P.001689.1	2P.scaffold-6344	1736	3294	Calcium-dependent protein kinase 12
AGROCRI.2P.001690.1	2P.scaffold-3958	1021	2402	Histidinol dehydrogenase
AGROCRI.2P.001691.1	2P.scaffold-13946	693	2282	Protein of unknown function
AGROCRI.2P.001692.1	2P.scaffold-53801	4601	8981	Protein of unknown function
AGROCRI.2P.001693.1	2P.scaffold-8854	2	253	Protein of unknown function
AGROCRI.2P.001694.1	2P.scaffold-8854	380	1055	Protein of unknown function
AGROCRI.2P.001695.1	2P.scaffold-8854	1233	2027	Protein of unknown function
AGROCRI.2P.001696.1	2P.scaffold-10131	294	2186	Protein of unknown function
AGROCRI.2P.001697.1	2P.scaffold-5259	1392	2969	Protein of unknown function
AGROCRI.2P.001698.1	2P.scaffold-11454	2	1631	Protein of unknown function
AGROCRI.2P.001699.1	2P.scaffold-11454	2145	2806	Protein of unknown function
AGROCRI.2P.001700.1	2P.scaffold-153002	75	3275	Protein of unknown function
AGROCRI.2P.001701.1	2P.scaffold-28991	983	2478	Protein of unknown function
AGROCRI.2P.001702.1	2P.scaffold-28991	8458	9688	Protein of unknown function
AGROCRI.2P.001703.1	2P.scaffold-5365	770	3379	Protein of unknown function
AGROCRI.2P.001704.1	2P.scaffold-26039	1888	16166	Protein of unknown function
AGROCRI.2P.001705.1	2P.scaffold-4776	2353	2667	Protein of unknown function
AGROCRI.2P.001706.1	2P.scaffold-4776	3112	4373	Protein of unknown function
AGROCRI.2P.001707.1	2P.scaffold-4776	5034	5414	Protein of unknown function
AGROCRI.2P.001708.1	2P.scaffold-211907	1458	3819	Protein of unknown function
AGROCRI.2P.001709.1	2P.scaffold-18038	33	2324	Protein of unknown function
AGROCRI.2P.001710.1	2P.scaffold-3756	274	6099	Protein of unknown function
AGROCRI.2P.001711.1	2P.scaffold-5555	813	2629	Protein of unknown function
AGROCRI.2P.001712.1	2P.scaffold-5555	2859	3836	Protein of unknown function
AGROCRI.2P.001713.1	2P.scaffold-10856	146	2205	Histidine--tRNA ligase
AGROCRI.2P.001714.1	2P.scaffold-10856	3565	4674	Protein of unknown function
AGROCRI.2P.001715.1	2P.scaffold-6346	879	3160	Chaperone protein ClpB2
AGROCRI.2P.001716.1	2P.scaffold-20062	76	4049	Protein of unknown function
AGROCRI.2P.001717.1	2P.scaffold-36152	1207	3968	Protein of unknown function
AGROCRI.2P.001718.1	2P.scaffold-7729	3035	3783	Protein of unknown function
AGROCRI.2P.001719.1	2P.scaffold-7729	4084	4638	Protein of unknown function
AGROCRI.2P.001720.1	2P.scaffold-7729	4967	5679	Protein of unknown function
AGROCRI.2P.001721.1	2P.scaffold-96345	118	1053	Protein of unknown function
AGROCRI.2P.001722.1	2P.scaffold-96345	1455	3261	Protein of unknown function
AGROCRI.2P.001723.1	2P.scaffold-215601	2981	5204	Protein of unknown function
AGROCRI.2P.001724.1	2P.scaffold-215601	8022	9099	Protein of unknown function
AGROCRI.2P.001725.1	2P.scaffold-4787	532	4089	Calcium-dependent protein kinase 7
AGROCRI.2P.001726.1	2P.scaffold-183916	709	2889	Protein of unknown function
AGROCRI.2P.001727.1	2P.scaffold-183916	3477	4564	Protein of unknown function
AGROCRI.2P.001728.1	2P.scaffold-67748	2138	4860	Protein of unknown function
AGROCRI.2P.001729.1	2P.scaffold-67748	5334	6123	Protein of unknown function
AGROCRI.2P.001730.1	2P.scaffold-215690	4818	5503	Protein of unknown function
AGROCRI.2P.001731.1	2P.scaffold-215690	5576	5914	Protein of unknown function
AGROCRI.2P.001732.1	2P.scaffold-215690	11244	12050	Protein of unknown function
AGROCRI.2P.001733.1	2P.scaffold-131	3	2059	Protein of unknown function
AGROCRI.2P.001734.1	2P.scaffold-41528	2888	3433	Protein of unknown function
AGROCRI.2P.001735.1	2P.scaffold-41528	4464	6414	Protein of unknown function
AGROCRI.2P.001736.1	2P.scaffold-215397	4106	12693	Protein of unknown function
AGROCRI.2P.001737.1	2P.scaffold-2962	13222	16269	Protein of unknown function
AGROCRI.2P.001738.1	2P.scaffold-1274	6344	9536	Protein of unknown function
AGROCRI.2P.001739.1	2P.scaffold-3043	1447	2024	Protein of unknown function
AGROCRI.2P.001740.1	2P.scaffold-3043	2897	3604	Protein of unknown function
AGROCRI.2P.001741.1	2P.scaffold-3043	4838	5781	Protein of unknown function
AGROCRI.2P.001742.1	2P.scaffold-6727	3209	5354	Flavonoid O-methyltransferase-like protein Os11g0303600
AGROCRI.2P.001743.1	2P.scaffold-6727	9242	11593	Protein of unknown function
AGROCRI.2P.001744.1	2P.scaffold-212168	3076	4789	Probable low-specificity L-threonine aldolase 1
AGROCRI.2P.001745.1	2P.scaffold-4540	1558	5273	Protein of unknown function
AGROCRI.2P.001746.1	2P.scaffold-4671	1406	4598	Rhodanese-like domain-containing protein 8
AGROCRI.2P.001747.1	2P.scaffold-60568	687	1148	Protein of unknown function
AGROCRI.2P.001748.1	2P.scaffold-60568	1787	4743	Protein of unknown function
AGROCRI.2P.001749.1	2P.scaffold-3175	4897	7343	Fibrillin protein 5 homolog
AGROCRI.2P.001750.1	2P.scaffold-10574	1	436	Protein of unknown function
AGROCRI.2P.001751.1	2P.scaffold-10574	502	1663	Protein of unknown function
AGROCRI.2P.001752.1	2P.scaffold-3647	2130	5158	Protein of unknown function
AGROCRI.2P.001753.1	2P.scaffold-3647	3678	3947	Protein of unknown function
AGROCRI.2P.001754.1	2P.scaffold-214902	1019	6708	Protein of unknown function
AGROCRI.2P.001755.1	2P.scaffold-215296	7877	10174	DNA-directed RNA polymerase subunit beta
AGROCRI.2P.001756.1	2P.scaffold-215296	11247	14978	DNA-directed RNA polymerase subunit beta''
AGROCRI.2P.001757.1	2P.scaffold-87386	554	2942	Protein of unknown function
AGROCRI.2P.001758.1	2P.scaffold-8518	1515	4566	Protein of unknown function
AGROCRI.2P.001759.1	2P.scaffold-5423	277	1348	Protein of unknown function
AGROCRI.2P.001760.1	2P.scaffold-5423	2669	3890	Protein of unknown function
AGROCRI.2P.001761.1	2P.scaffold-3911	903	3811	Protein of unknown function
AGROCRI.2P.001762.1	2P.scaffold-3911	10838	11626	Protein of unknown function
AGROCRI.2P.001763.1	2P.scaffold-13735	2461	9760	Protein of unknown function
AGROCRI.2P.001764.1	2P.scaffold-6737	3761	6662	Protein of unknown function
AGROCRI.2P.001765.1	2P.scaffold-17558	57	2044	DExH-box ATP-dependent RNA helicase DExH7
AGROCRI.2P.001766.1	2P.scaffold-11978	208	498	Protein of unknown function
AGROCRI.2P.001767.1	2P.scaffold-11978	1400	4931	Protein of unknown function
AGROCRI.2P.001768.1	2P.scaffold-1646	171	831	Protein of unknown function
AGROCRI.2P.001769.1	2P.scaffold-1646	1235	3529	Protein of unknown function
AGROCRI.2P.001770.1	2P.scaffold-64366	15	4011	Protein of unknown function
AGROCRI.2P.001771.1	2P.scaffold-94095	193	3538	Protein of unknown function
AGROCRI.2P.001772.1	2P.scaffold-2792	1199	2952	Protein of unknown function
AGROCRI.2P.001773.1	2P.scaffold-2792	6572	7520	Protein of unknown function
AGROCRI.2P.001774.1	2P.scaffold-39	999	3331	Protein of unknown function
AGROCRI.2P.001775.1	2P.scaffold-8338	1589	3418	Protein of unknown function
AGROCRI.2P.001776.1	2P.scaffold-8338	8990	9845	Sm-like protein LSM7
AGROCRI.2P.001777.1	2P.scaffold-31044	82	2118	Glutamine synthetase cytosolic isozyme 1-2
AGROCRI.2P.001778.1	2P.scaffold-3127	2065	8844	Zinc finger CCCH domain-containing protein 30
AGROCRI.2P.001779.1	2P.scaffold-32649	1115	5318	Protein of unknown function
AGROCRI.2P.001780.1	2P.scaffold-9363	711	3626	Phospholipase D delta
AGROCRI.2P.001781.1	2P.scaffold-4190	1652	6327	Protein of unknown function
AGROCRI.2P.001782.1	2P.scaffold-188118	1847	5177	Protein of unknown function
AGROCRI.2P.001783.1	2P.scaffold-5854	1379	6729	Protein of unknown function
AGROCRI.2P.001784.1	2P.scaffold-8089	1245	3660	Protein of unknown function
AGROCRI.2P.001785.1	2P.scaffold-7114	5144	5970	Protein of unknown function
AGROCRI.2P.001786.1	2P.scaffold-7114	6767	7195	Protein of unknown function
AGROCRI.2P.001787.1	2P.scaffold-7114	9595	9930	Protein of unknown function
AGROCRI.2P.001788.1	2P.scaffold-29306	196	2649	Protein of unknown function
AGROCRI.2P.001789.1	2P.scaffold-83253	92	1783	Nuclear/nucleolar GTPase 2
AGROCRI.2P.001790.1	2P.scaffold-83253	3856	4937	Protein of unknown function
AGROCRI.2P.001791.1	2P.scaffold-3875	3792	6017	Protein of unknown function
AGROCRI.2P.001792.1	2P.scaffold-3875	6099	7161	Protein of unknown function
AGROCRI.2P.001793.1	2P.scaffold-213780	2	985	Protein of unknown function
AGROCRI.2P.001794.1	2P.scaffold-213780	1599	7890	Protein of unknown function
AGROCRI.2P.001795.1	2P.scaffold-4435	105	1446	Protein of unknown function
AGROCRI.2P.001796.1	2P.scaffold-4435	4060	5666	Receptor kinase-like protein Xa21
AGROCRI.2P.001797.1	2P.scaffold-8648	1668	4166	Protein of unknown function
AGROCRI.2P.001798.1	2P.scaffold-39818	1093	5048	Transcription factor-like protein DPB
AGROCRI.2P.001799.1	2P.scaffold-15048	10	3272	Exosome complex exonuclease RRP44 homolog A
AGROCRI.2P.001800.1	2P.scaffold-215525	11124	15706	Organic cation/carnitine transporter 4
AGROCRI.2P.001801.1	2P.scaffold-215525	18504	18965	Protein of unknown function
AGROCRI.2P.001802.1	2P.scaffold-7647	2090	5124	Protein of unknown function
AGROCRI.2P.001803.1	2P.scaffold-3365	3	2522	Protein of unknown function
AGROCRI.2P.001804.1	2P.scaffold-166055	103	725	Protein of unknown function
AGROCRI.2P.001805.1	2P.scaffold-166055	2133	2537	Protein of unknown function
AGROCRI.2P.001806.1	2P.scaffold-166055	4033	4946	Protein of unknown function
AGROCRI.2P.001807.1	2P.scaffold-14358	2585	4753	Protein of unknown function
AGROCRI.2P.001808.1	2P.scaffold-3590	2096	5763	Protein of unknown function
AGROCRI.2P.001809.1	2P.scaffold-212805	1893	2722	Protein of unknown function
AGROCRI.2P.001810.1	2P.scaffold-212805	3199	5251	Protein of unknown function
AGROCRI.2P.001811.1	2P.scaffold-3318	3	1778	Protein of unknown function
AGROCRI.2P.001812.1	2P.scaffold-3318	3036	4680	Protein of unknown function
AGROCRI.2P.001813.1	2P.scaffold-3165	3830	4830	Protein of unknown function
AGROCRI.2P.001814.1	2P.scaffold-3165	7020	9938	Protein of unknown function
AGROCRI.2P.001815.1	2P.scaffold-4179	968	5827	Protein of unknown function
AGROCRI.2P.001816.1	2P.scaffold-3325	5043	7143	Protein of unknown function
AGROCRI.2P.001817.1	2P.scaffold-5674	898	3281	Protein of unknown function
AGROCRI.2P.001818.1	2P.scaffold-5148	7728	10333	Protein of unknown function
AGROCRI.2P.001819.1	2P.scaffold-6261	889	3837	Protein of unknown function
AGROCRI.2P.001820.1	2P.scaffold-24468	8123	10232	Protein of unknown function
AGROCRI.2P.001821.1	2P.scaffold-5205	1115	3419	NAD-dependent malic enzyme 1
AGROCRI.2P.001822.1	2P.scaffold-11992	1571	3533	Protein of unknown function
AGROCRI.2P.001823.1	2P.scaffold-11986	104	1767	Serine/threonine-protein kinase EDR1
AGROCRI.2P.001824.1	2P.scaffold-7583	1050	3543	Protein of unknown function
AGROCRI.2P.001825.1	2P.scaffold-43424	3710	5564	Protein of unknown function
AGROCRI.2P.001826.1	2P.scaffold-40611	134	4614	Protein of unknown function
AGROCRI.2P.001827.1	2P.scaffold-17561	2	1963	Cysteine-rich receptor-like protein kinase 6
AGROCRI.2P.001828.1	2P.scaffold-28172	9	2492	Protein of unknown function
AGROCRI.2P.001829.1	2P.scaffold-6571	2472	4869	Protein of unknown function
AGROCRI.2P.001830.1	2P.scaffold-20459	867	4691	Protein of unknown function
AGROCRI.2P.001831.1	2P.scaffold-9709	3025	4993	Calcium-dependent protein kinase 17
AGROCRI.2P.001832.1	2P.scaffold-9826	80	2544	Protein of unknown function
AGROCRI.2P.001833.1	2P.scaffold-3848	827	5360	Probable metal-nicotianamine transporter YSL5
AGROCRI.2P.001834.1	2P.scaffold-3500	320	3287	Vacuole membrane protein KMS1
AGROCRI.2P.001835.1	2P.scaffold-21	5039	8499	Protein of unknown function
AGROCRI.2P.001836.1	2P.scaffold-13974	2454	2747	Protein of unknown function
AGROCRI.2P.001837.1	2P.scaffold-13974	7851	9133	Potassium transporter 1
AGROCRI.2P.001838.1	2P.scaffold-3153	5053	5775	Zinc finger protein 10
AGROCRI.2P.001839.1	2P.scaffold-3153	8887	10337	Protein of unknown function
AGROCRI.2P.001840.1	2P.scaffold-62204	1482	3333	Protein of unknown function
AGROCRI.2P.001841.1	2P.scaffold-62204	3846	4771	Protein of unknown function
AGROCRI.2P.001842.1	2P.scaffold-3358	5319	8723	Protein of unknown function
AGROCRI.2P.001843.1	2P.scaffold-3358	9617	10077	Protein of unknown function
AGROCRI.2P.001844.1	2P.scaffold-6510	1	2214	Protein of unknown function
AGROCRI.2P.001845.1	2P.scaffold-7974	807	2029	Mitotic spindle checkpoint protein MAD2
AGROCRI.2P.001846.1	2P.scaffold-4213	3	314	Protein of unknown function
AGROCRI.2P.001847.1	2P.scaffold-4213	5586	7373	Protein of unknown function
AGROCRI.2P.001848.1	2P.scaffold-98566	192	212	Protein of unknown function
AGROCRI.2P.001849.1	2P.scaffold-98566	798	1757	Protein of unknown function
AGROCRI.2P.001850.1	2P.scaffold-98566	2779	3318	Protein of unknown function
AGROCRI.2P.001851.1	2P.scaffold-5950	1834	3168	Protein of unknown function
AGROCRI.2P.001852.1	2P.scaffold-10462	237	764	Protein of unknown function
AGROCRI.2P.001853.1	2P.scaffold-10462	2752	6446	Protein of unknown function
AGROCRI.2P.001854.1	2P.scaffold-3582	3210	5318	Protein of unknown function
AGROCRI.2P.001855.1	2P.scaffold-3582	10866	12096	Protein of unknown function
AGROCRI.2P.001856.1	2P.scaffold-62548	2937	5856	Protein of unknown function
AGROCRI.2P.001857.1	2P.scaffold-62548	6296	6962	Protein of unknown function
AGROCRI.2P.001858.1	2P.scaffold-7618	630	2804	Protein of unknown function
AGROCRI.2P.001859.1	2P.scaffold-49721	34	3359	Protein of unknown function
AGROCRI.2P.001860.1	2P.scaffold-164212	1145	3590	Protein of unknown function
AGROCRI.2P.001861.1	2P.scaffold-8967	713	1997	Protein of unknown function
AGROCRI.2P.001862.1	2P.scaffold-8967	5967	6858	Protein of unknown function
AGROCRI.2P.001863.1	2P.scaffold-18833	269	1513	Protein of unknown function
AGROCRI.2P.001864.1	2P.scaffold-18833	2580	3235	Protein of unknown function
AGROCRI.2P.001865.1	2P.scaffold-206065	3	2197	Protein of unknown function
AGROCRI.2P.001866.1	2P.scaffold-10624	4575	7931	Protein of unknown function
AGROCRI.2P.001867.1	2P.scaffold-10624	8013	8955	Protein of unknown function
AGROCRI.2P.001868.1	2P.scaffold-215417	5412	9516	Protein of unknown function
AGROCRI.2P.001869.1	2P.scaffold-211950	112	4614	Protein of unknown function
AGROCRI.2P.001870.1	2P.scaffold-112348	1749	3840	Protein of unknown function
AGROCRI.2P.001871.1	2P.scaffold-112348	7839	8987	Protein of unknown function
AGROCRI.2P.001872.1	2P.scaffold-89	2	4560	Hydroxymethylglutaryl-CoA synthase
AGROCRI.2P.001873.1	2P.scaffold-8049	6004	8419	Protein of unknown function
AGROCRI.2P.001874.1	2P.scaffold-4865	3	4004	Probable metal-nicotianamine transporter YSL9
AGROCRI.2P.001875.1	2P.scaffold-54999	4679	8827	Protein of unknown function
AGROCRI.2P.001876.1	2P.scaffold-5227	7031	9726	Protein of unknown function
AGROCRI.2P.001877.1	2P.scaffold-215375	119	2635	Protein of unknown function
AGROCRI.2P.001878.1	2P.scaffold-4241	1	3062	Protein of unknown function
AGROCRI.2P.001879.1	2P.scaffold-7206	211	2182	Protein of unknown function
AGROCRI.2P.001880.1	2P.scaffold-61243	1984	7416	Protein of unknown function
AGROCRI.2P.001881.1	2P.scaffold-3335	275	961	Protein of unknown function
AGROCRI.2P.001882.1	2P.scaffold-3335	1432	3456	Protein of unknown function
AGROCRI.2P.001883.1	2P.scaffold-29861	8934	11174	Protein of unknown function
AGROCRI.2P.001884.1	2P.scaffold-10445	31	3975	Protein VTE6
AGROCRI.2P.001885.1	2P.scaffold-5612	1790	3617	Protein of unknown function
AGROCRI.2P.001886.1	2P.scaffold-5612	3690	4079	Protein of unknown function
AGROCRI.2P.001887.1	2P.scaffold-18289	939	2392	Protein of unknown function
AGROCRI.2P.001888.1	2P.scaffold-18289	12892	13375	Protein of unknown function
AGROCRI.2P.001889.1	2P.scaffold-6370	181	2941	Soluble inorganic pyrophosphatase
AGROCRI.2P.001890.1	2P.scaffold-7860	212	1744	Protein of unknown function
AGROCRI.2P.001891.1	2P.scaffold-43977	2	387	Protein of unknown function
AGROCRI.2P.001892.1	2P.scaffold-43977	1945	2358	Protein of unknown function
AGROCRI.2P.001893.1	2P.scaffold-43977	3798	4421	Protein of unknown function
AGROCRI.2P.001894.1	2P.scaffold-14353	4495	7606	COP9 signalosome complex subunit 5
AGROCRI.2P.001895.1	2P.scaffold-3438	3676	9424	Protein of unknown function
AGROCRI.2P.001896.1	2P.scaffold-15071	1	1811	DNA-directed RNA polymerases II and IV subunit 5A
AGROCRI.2P.001897.1	2P.scaffold-15071	2593	3389	Protein of unknown function
AGROCRI.2P.001898.1	2P.scaffold-214667	4766	8481	Protein of unknown function
AGROCRI.2P.001899.1	2P.scaffold-214667	10488	10769	Non-specific lipid-transfer protein 2G
AGROCRI.2P.001900.1	2P.scaffold-3543	5317	8535	Protein of unknown function
AGROCRI.2P.001901.1	2P.scaffold-6844	1998	3919	Probable methyltransferase PMT26
AGROCRI.2P.001902.1	2P.scaffold-73462	1202	2911	Protein of unknown function
AGROCRI.2P.001903.1	2P.scaffold-73462	1892	2320	Protein of unknown function
AGROCRI.2P.001904.1	2P.scaffold-132733	1964	2938	Protein of unknown function
AGROCRI.2P.001905.1	2P.scaffold-132733	3399	6383	Protein of unknown function
AGROCRI.2P.001906.1	2P.scaffold-93936	3615	6033	Protein of unknown function
AGROCRI.2P.001907.1	2P.scaffold-4086	5933	8622	Protein of unknown function
AGROCRI.2P.001908.1	2P.scaffold-458	8090	8992	Protein of unknown function
AGROCRI.2P.001909.1	2P.scaffold-458	10053	11339	Protein of unknown function
AGROCRI.2P.001910.1	2P.scaffold-139803	2686	4501	Protein of unknown function
AGROCRI.2P.001911.1	2P.scaffold-8182	4929	7011	Ras-related protein RABF1
AGROCRI.2P.001912.1	2P.scaffold-19068	6922	9937	Protein of unknown function
AGROCRI.2P.001913.1	2P.scaffold-92	4137	8710	Protein of unknown function
AGROCRI.2P.001914.1	2P.scaffold-92	10049	10681	Protein of unknown function
AGROCRI.2P.001915.1	2P.scaffold-3925	4090	6758	Protein of unknown function
AGROCRI.2P.001916.1	2P.scaffold-3999	1718	5269	Protein of unknown function
AGROCRI.2P.001917.1	2P.scaffold-3319	2222	6337	Protein of unknown function
AGROCRI.2P.001918.1	2P.scaffold-201	81	1019	Protein of unknown function
AGROCRI.2P.001919.1	2P.scaffold-201	13630	14085	Protein of unknown function
AGROCRI.2P.001920.1	2P.scaffold-201	15230	15625	Protein of unknown function
AGROCRI.2P.001921.1	2P.scaffold-123003	2	394	Protein of unknown function
AGROCRI.2P.001922.1	2P.scaffold-123003	1995	5669	Protein of unknown function
AGROCRI.2P.001923.1	2P.scaffold-11128	750	3957	Protein of unknown function
AGROCRI.2P.001924.1	2P.scaffold-214898	12990	13454	Protein of unknown function
AGROCRI.2P.001925.1	2P.scaffold-214898	13834	14874	Protein of unknown function
AGROCRI.2P.001926.1	2P.scaffold-78824	1151	4701	Protein of unknown function
AGROCRI.2P.001927.1	2P.scaffold-13211	1010	3973	Gamma-secretase subunit APH1-like
AGROCRI.2P.001928.1	2P.scaffold-23996	74	1295	Protein of unknown function
AGROCRI.2P.001929.1	2P.scaffold-23996	2473	5010	Protein of unknown function
AGROCRI.2P.001930.1	2P.scaffold-3795	64	899	Histidine--tRNA ligase
AGROCRI.2P.001931.1	2P.scaffold-3795	1393	3473	Protein of unknown function
AGROCRI.2P.001932.1	2P.scaffold-9016	1	1577	Protein of unknown function
AGROCRI.2P.001933.1	2P.scaffold-3617	1721	5456	Protein of unknown function
AGROCRI.2P.001934.1	2P.scaffold-5416	3633	5666	Protein of unknown function
AGROCRI.2P.001935.1	2P.scaffold-4675	1975	4782	Protein of unknown function
AGROCRI.2P.001936.1	2P.scaffold-1816	1004	1093	Protein of unknown function
AGROCRI.2P.001937.1	2P.scaffold-1816	1133	2034	Protein of unknown function
AGROCRI.2P.001938.1	2P.scaffold-1816	2089	2442	Protein of unknown function
AGROCRI.2P.001939.1	2P.scaffold-10330	611	1015	Protein of unknown function
AGROCRI.2P.001940.1	2P.scaffold-10330	1388	2167	Protein of unknown function
AGROCRI.2P.001941.1	2P.scaffold-73513	6771	8328	Protein of unknown function
AGROCRI.2P.001942.1	2P.scaffold-4091	666	3840	Protein of unknown function
AGROCRI.2P.001943.1	2P.scaffold-12917	250	1893	60S ribosomal protein L10-2
AGROCRI.2P.001944.1	2P.scaffold-6377	828	3026	Protein of unknown function
AGROCRI.2P.001945.1	2P.scaffold-1673	7292	10453	Protein of unknown function
AGROCRI.2P.001946.1	2P.scaffold-3042	25	2607	Vesicle-associated protein 4-2
AGROCRI.2P.001947.1	2P.scaffold-6865	8330	12034	Protein of unknown function
AGROCRI.2P.001948.1	2P.scaffold-6150	2173	3554	Protein of unknown function
AGROCRI.2P.001949.1	2P.scaffold-214900	455	2827	Protein of unknown function
AGROCRI.2P.001950.1	2P.scaffold-3334	4384	8309	Probable galacturonosyltransferase 14
AGROCRI.2P.001951.1	2P.scaffold-56224	8184	8733	Protein of unknown function
AGROCRI.2P.001952.1	2P.scaffold-56224	12436	12918	Protein of unknown function
AGROCRI.2P.001953.1	2P.scaffold-56224	13009	14187	Protein of unknown function
AGROCRI.2P.001954.1	2P.scaffold-6641	6476	9339	Probable alpha-glucosidase Os06g0675700
AGROCRI.2P.001955.1	2P.scaffold-6641	11670	12257	Protein of unknown function
AGROCRI.2P.001956.1	2P.scaffold-3439	3065	3392	Protein of unknown function
AGROCRI.2P.001957.1	2P.scaffold-3439	5201	6037	Protein of unknown function
AGROCRI.2P.001958.1	2P.scaffold-4397	1214	5273	Protein of unknown function
AGROCRI.2P.001959.1	2P.scaffold-15237	928	3024	Protein of unknown function
AGROCRI.2P.001960.1	2P.scaffold-4611	581	2783	Protein of unknown function
AGROCRI.2P.001961.1	2P.scaffold-4611	3314	4393	ATP synthase subunit gamma
AGROCRI.2P.001962.1	2P.scaffold-3330	835	4195	Protein of unknown function
AGROCRI.2P.001963.1	2P.scaffold-114882	7003	8575	Protein of unknown function
AGROCRI.2P.001964.1	2P.scaffold-18166	3482	5804	Protein of unknown function
AGROCRI.2P.001965.1	2P.scaffold-106644	1	1121	Cell division protein FtsZ homolog 1
AGROCRI.2P.001966.1	2P.scaffold-106644	1304	2256	Protein of unknown function
AGROCRI.2P.001967.1	2P.scaffold-8532	2137	6268	Protein of unknown function
AGROCRI.2P.001968.1	2P.scaffold-9273	117	557	Protein of unknown function
AGROCRI.2P.001969.1	2P.scaffold-9273	1679	7058	Protein of unknown function
AGROCRI.2P.001970.1	2P.scaffold-214672	902	3585	Protein of unknown function
AGROCRI.2P.001971.1	2P.scaffold-9589	2549	6123	Protein of unknown function
AGROCRI.2P.001972.1	2P.scaffold-23857	86	1782	Protein of unknown function
AGROCRI.2P.001973.1	2P.scaffold-148527	1	1875	Probable metal-nicotianamine transporter YSL11
AGROCRI.2P.001974.1	2P.scaffold-4455	11140	13142	Protein of unknown function
AGROCRI.2P.001975.1	2P.scaffold-131669	540	2341	Protein of unknown function
AGROCRI.2P.001976.1	2P.scaffold-207791	1158	2709	1
AGROCRI.2P.001977.1	2P.scaffold-6325	451	2354	Protein of unknown function
AGROCRI.2P.001978.1	2P.scaffold-5480	170	3577	Protein of unknown function
AGROCRI.2P.001979.1	2P.scaffold-3393	8667	11762	Protein of unknown function
AGROCRI.2P.001980.1	2P.scaffold-22003	3	2539	Protein of unknown function
AGROCRI.2P.001981.1	2P.scaffold-3242	1824	3983	Protein of unknown function
AGROCRI.2P.001982.1	2P.scaffold-211455	2229	4914	Protein of unknown function
AGROCRI.2P.001983.1	2P.scaffold-73113	30	4222	Protein of unknown function
AGROCRI.2P.001984.1	2P.scaffold-3447	4372	5709	Protein of unknown function
AGROCRI.2P.001985.1	2P.scaffold-3447	6087	8225	Protein of unknown function
AGROCRI.2P.001986.1	2P.scaffold-5088	1016	2834	Probable UDP-N-acetylglucosamine--peptide N-acetylglucosaminyltransferase SEC
AGROCRI.2P.001987.1	2P.scaffold-13095	4054	4720	Protein of unknown function
AGROCRI.2P.001988.1	2P.scaffold-13095	5210	5914	Quinone-oxidoreductase QR2
AGROCRI.2P.001989.1	2P.scaffold-4096	4380	9058	Homeobox protein knotted-1-like 12
AGROCRI.2P.001990.1	2P.scaffold-14991	12365	14745	Protein of unknown function
AGROCRI.2P.001991.1	2P.scaffold-4767	234	266	Protein of unknown function
AGROCRI.2P.001992.1	2P.scaffold-4767	510	2354	Protein of unknown function
AGROCRI.2P.001993.1	2P.scaffold-214853	2529	4169	Protein of unknown function
AGROCRI.2P.001994.1	2P.scaffold-214853	7005	7734	Protein of unknown function
AGROCRI.2P.001995.1	2P.scaffold-215045	115	5642	Protein of unknown function
AGROCRI.2P.001996.1	2P.scaffold-215045	5902	7032	Protein of unknown function
AGROCRI.2P.001997.1	2P.scaffold-5412	36	2202	Protein of unknown function
AGROCRI.2P.001998.1	2P.scaffold-75138	7097	8778	Protein of unknown function
[truncated: 5,702 more rows]

## Sheet: 3P
Table S3: Overview of annotated genes in the draft assemblies of Agropyron cristatum.
Chromosome position	Scaffold name	Start position	End position	Annotated genes
AGROCRI.3P.000001.1	3P.scaffold-3611	5361	10268	Polyglutamine-binding protein 1
AGROCRI.3P.000002.1	3P.scaffold-3611	11580	18229	AP-4 complex subunit epsilon
AGROCRI.3P.000003.1	3P.scaffold-3611	24572	28252	Protein of unknown function
AGROCRI.3P.000004.1	3P.scaffold-3611	29290	36477	Protein of unknown function
AGROCRI.3P.000005.1	3P.scaffold-3611	47273	55457	Protein of unknown function
AGROCRI.3P.000006.1	3P.scaffold-3611	56047	63209	Protein of unknown function
AGROCRI.3P.000007.1	3P.scaffold-4772	823	3581	ABC transporter D family member 1
AGROCRI.3P.000008.1	3P.scaffold-4772	4056	10880	ABC transporter D family member 1
AGROCRI.3P.000009.1	3P.scaffold-4772	12471	15057	Protein of unknown function
AGROCRI.3P.000010.1	3P.scaffold-4772	22606	23963	Protein of unknown function
AGROCRI.3P.000011.1	3P.scaffold-4772	25925	30341	Protein of unknown function
AGROCRI.3P.000012.1	3P.scaffold-4772	31635	36127	Protein of unknown function
AGROCRI.3P.000013.1	3P.scaffold-201540	500	4753	Protein of unknown function
AGROCRI.3P.000014.1	3P.scaffold-201540	7151	8467	Protein of unknown function
AGROCRI.3P.000015.1	3P.scaffold-201540	17087	21507	Protein of unknown function
AGROCRI.3P.000016.1	3P.scaffold-201540	29336	30136	Protein of unknown function
AGROCRI.3P.000017.1	3P.scaffold-201540	30342	34567	Protein of unknown function
AGROCRI.3P.000018.1	3P.scaffold-86153	15714	20215	Protein of unknown function
AGROCRI.3P.000019.1	3P.scaffold-86153	21575	26110	Protein of unknown function
AGROCRI.3P.000020.1	3P.scaffold-86153	33001	34125	Protein of unknown function
AGROCRI.3P.000021.1	3P.scaffold-86153	36617	40526	Protein of unknown function
AGROCRI.3P.000022.1	3P.scaffold-86153	42960	46645	Protein of unknown function
AGROCRI.3P.000023.1	3P.scaffold-4168	4173	26894	Protein of unknown function
AGROCRI.3P.000024.1	3P.scaffold-4168	17802	18867	Protein of unknown function
AGROCRI.3P.000025.1	3P.scaffold-38610	1	4462	Protein of unknown function
AGROCRI.3P.000026.1	3P.scaffold-38610	6613	10818	Protein of unknown function
AGROCRI.3P.000027.1	3P.scaffold-38610	15640	26446	Protein of unknown function
AGROCRI.3P.000028.1	3P.scaffold-2368	19430	19792	Protein of unknown function
AGROCRI.3P.000029.1	3P.scaffold-2368	21276	21485	Protein of unknown function
AGROCRI.3P.000030.1	3P.scaffold-2368	22801	27604	Protein of unknown function
AGROCRI.3P.000031.1	3P.scaffold-2368	31029	34020	Protein of unknown function
AGROCRI.3P.000032.1	3P.scaffold-2368	34642	35637	Protein of unknown function
AGROCRI.3P.000033.1	3P.scaffold-2368	36539	38169	Protein of unknown function
AGROCRI.3P.000034.1	3P.scaffold-2368	40315	43904	Protein of unknown function
AGROCRI.3P.000035.1	3P.scaffold-24477	3302	7550	Protein of unknown function
AGROCRI.3P.000036.1	3P.scaffold-24477	8945	12996	Protein of unknown function
AGROCRI.3P.000037.1	3P.scaffold-24477	20258	22720	Protein of unknown function
AGROCRI.3P.000038.1	3P.scaffold-24477	24154	27689	Protein of unknown function
AGROCRI.3P.000039.1	3P.scaffold-8829	49	5800	Dolichyl-diphosphooligosaccharide--protein glycosyltransferase subunit STT3A
AGROCRI.3P.000040.1	3P.scaffold-8829	6643	15069	Protein of unknown function
AGROCRI.3P.000041.1	3P.scaffold-11046	3227	7437	Protein of unknown function
AGROCRI.3P.000042.1	3P.scaffold-11046	8015	19327	Protein of unknown function
AGROCRI.3P.000043.1	3P.scaffold-4175	3428	11978	Vacuolar protein sorting-associated protein 53 A
AGROCRI.3P.000044.1	3P.scaffold-4175	13589	17805	Protein of unknown function
AGROCRI.3P.000045.1	3P.scaffold-4192	2840	15135	Myosin-17
AGROCRI.3P.000046.1	3P.scaffold-20061	225	7019	Protein of unknown function
AGROCRI.3P.000047.1	3P.scaffold-20061	8030	10683	WD repeat-containing protein ATCSA-1
AGROCRI.3P.000048.1	3P.scaffold-20061	12828	19304	Protein of unknown function
AGROCRI.3P.000049.1	3P.scaffold-20061	19879	22633	Protein of unknown function
AGROCRI.3P.000050.1	3P.scaffold-29448	2260	9770	Protein of unknown function
AGROCRI.3P.000051.1	3P.scaffold-29448	12421	13626	Protein of unknown function
AGROCRI.3P.000052.1	3P.scaffold-29448	29992	34629	Protein of unknown function
AGROCRI.3P.000053.1	3P.scaffold-175	1122	1611	Protein of unknown function
AGROCRI.3P.000054.1	3P.scaffold-175	3990	24274	Protein of unknown function
AGROCRI.3P.000055.1	3P.scaffold-122241	8955	12955	Protein of unknown function
AGROCRI.3P.000056.1	3P.scaffold-122241	14428	17781	Protein of unknown function
AGROCRI.3P.000057.1	3P.scaffold-122241	20196	23736	Dihydropyrimidinase
AGROCRI.3P.000058.1	3P.scaffold-122241	25369	28645	Transcription factor HBP-1b(c1) (Fragment)
AGROCRI.3P.000059.1	3P.scaffold-89669	2173	3782	Protein COFACTOR ASSEMBLY OF COMPLEX C SUBUNIT B CCB1
AGROCRI.3P.000060.1	3P.scaffold-89669	4949	6971	Protein of unknown function
AGROCRI.3P.000061.1	3P.scaffold-89669	8404	9663	Protein of unknown function
AGROCRI.3P.000062.1	3P.scaffold-89669	10196	13852	Protein of unknown function
AGROCRI.3P.000063.1	3P.scaffold-89669	16778	19105	Protein of unknown function
AGROCRI.3P.000064.1	3P.scaffold-89669	24760	35874	Protein of unknown function
AGROCRI.3P.000065.1	3P.scaffold-2452	101	4299	Protein of unknown function
AGROCRI.3P.000066.1	3P.scaffold-2452	5068	5481	Protein of unknown function
AGROCRI.3P.000067.1	3P.scaffold-2452	8361	9727	Protein of unknown function
AGROCRI.3P.000068.1	3P.scaffold-2452	12543	14836	Protein of unknown function
AGROCRI.3P.000069.1	3P.scaffold-2452	19848	24713	Protein of unknown function
AGROCRI.3P.000070.1	3P.scaffold-4123	3963	21791	Protein of unknown function
AGROCRI.3P.000071.1	3P.scaffold-4123	10647	14500	Protein of unknown function
AGROCRI.3P.000072.1	3P.scaffold-202060	11719	12354	Protein of unknown function
AGROCRI.3P.000073.1	3P.scaffold-202060	12850	13080	Protein of unknown function
AGROCRI.3P.000074.1	3P.scaffold-202060	16658	18766	Protein of unknown function
AGROCRI.3P.000075.1	3P.scaffold-202060	19786	32054	Long chain acyl-CoA synthetase 4
AGROCRI.3P.000076.1	3P.scaffold-6735	4236	12722	Protein of unknown function
AGROCRI.3P.000077.1	3P.scaffold-6735	14613	17815	Protein of unknown function
AGROCRI.3P.000078.1	3P.scaffold-6735	18488	21362	Protein of unknown function
AGROCRI.3P.000079.1	3P.scaffold-169145	5464	6096	Protein of unknown function
AGROCRI.3P.000080.1	3P.scaffold-169145	6190	16599	Protein of unknown function
AGROCRI.3P.000081.1	3P.scaffold-169145	18801	19088	Protein of unknown function
AGROCRI.3P.000082.1	3P.scaffold-169145	22364	25582	Protein of unknown function
AGROCRI.3P.000083.1	3P.scaffold-103	1174	4161	Protein of unknown function
AGROCRI.3P.000084.1	3P.scaffold-103	5695	6939	Protein of unknown function
AGROCRI.3P.000085.1	3P.scaffold-103	35961	46884	E3 ubiquitin-protein ligase BRE1-like 1
AGROCRI.3P.000086.1	3P.scaffold-4167	1801	8022	Protein of unknown function
AGROCRI.3P.000087.1	3P.scaffold-4167	9263	15379	Protein of unknown function
AGROCRI.3P.000088.1	3P.scaffold-23037	6720	25596	Ubiquitin carboxyl-terminal hydrolase 13
AGROCRI.3P.000089.1	3P.scaffold-41965	12156	13585	Protein of unknown function
AGROCRI.3P.000090.1	3P.scaffold-41965	28902	29535	Protein of unknown function
AGROCRI.3P.000091.1	3P.scaffold-41965	30959	34430	Protein of unknown function
AGROCRI.3P.000092.1	3P.scaffold-41965	35316	38654	Protein of unknown function
AGROCRI.3P.000093.1	3P.scaffold-41965	40442	42104	Protein of unknown function
AGROCRI.3P.000094.1	3P.scaffold-202100	12997	14459	Protein of unknown function
AGROCRI.3P.000095.1	3P.scaffold-202100	26975	27608	Protein of unknown function
AGROCRI.3P.000096.1	3P.scaffold-202100	29032	32503	Protein of unknown function
AGROCRI.3P.000097.1	3P.scaffold-202100	33429	36687	Protein of unknown function
AGROCRI.3P.000098.1	3P.scaffold-202100	38475	40137	Protein of unknown function
AGROCRI.3P.000099.1	3P.scaffold-55995	4913	5737	Protein of unknown function
AGROCRI.3P.000100.1	3P.scaffold-55995	10227	16859	Protein of unknown function
AGROCRI.3P.000101.1	3P.scaffold-55995	20849	22150	Protein of unknown function
AGROCRI.3P.000102.1	3P.scaffold-55995	28091	29478	Protein of unknown function
AGROCRI.3P.000103.1	3P.scaffold-55995	30417	31779	Protein of unknown function
AGROCRI.3P.000104.1	3P.scaffold-3999	189	2575	Protein of unknown function
AGROCRI.3P.000105.1	3P.scaffold-3999	13320	14129	Protein of unknown function
AGROCRI.3P.000106.1	3P.scaffold-3999	16027	18043	Protein of unknown function
AGROCRI.3P.000107.1	3P.scaffold-3999	20653	27492	Casein kinase 1-like protein 1
AGROCRI.3P.000108.1	3P.scaffold-200858	7284	11992	Protein of unknown function
AGROCRI.3P.000109.1	3P.scaffold-200858	12794	18090	Protein of unknown function
AGROCRI.3P.000110.1	3P.scaffold-200858	24233	24556	Protein of unknown function
AGROCRI.3P.000111.1	3P.scaffold-4451	121	5922	Dolichyl-diphosphooligosaccharide--protein glycosyltransferase subunit 2
AGROCRI.3P.000112.1	3P.scaffold-4451	7262	10259	ABC transporter B family member 26
AGROCRI.3P.000113.1	3P.scaffold-14182	7515	20220	DNA polymerase alpha catalytic subunit
AGROCRI.3P.000114.1	3P.scaffold-4495	218	298	Protein of unknown function
AGROCRI.3P.000115.1	3P.scaffold-4495	623	3051	Protein of unknown function
AGROCRI.3P.000116.1	3P.scaffold-4495	4463	10795	Glyoxysomal fatty acid beta-oxidation multifunctional protein MFP-a
AGROCRI.3P.000117.1	3P.scaffold-7255	866	8554	Villin-3
AGROCRI.3P.000118.1	3P.scaffold-7255	11069	12228	Protein of unknown function
AGROCRI.3P.000119.1	3P.scaffold-7255	12454	15316	Protein of unknown function
AGROCRI.3P.000120.1	3P.scaffold-4188	1876	11469	Protein of unknown function
AGROCRI.3P.000121.1	3P.scaffold-4188	12590	17070	Protein of unknown function
AGROCRI.3P.000122.1	3P.scaffold-4188	20809	22278	Protein of unknown function
AGROCRI.3P.000123.1	3P.scaffold-4697	7734	9466	Protein of unknown function
AGROCRI.3P.000124.1	3P.scaffold-4697	10870	13614	Protein of unknown function
AGROCRI.3P.000125.1	3P.scaffold-4697	15611	18845	Protein of unknown function
AGROCRI.3P.000126.1	3P.scaffold-4697	22060	27415	Protein of unknown function
AGROCRI.3P.000127.1	3P.scaffold-43719	449	466	Protein of unknown function
AGROCRI.3P.000128.1	3P.scaffold-43719	868	1395	Protein of unknown function
AGROCRI.3P.000129.1	3P.scaffold-43719	2127	2357	Protein of unknown function
AGROCRI.3P.000130.1	3P.scaffold-43719	2740	2943	Protein of unknown function
AGROCRI.3P.000131.1	3P.scaffold-43719	3543	8881	Protein of unknown function
AGROCRI.3P.000132.1	3P.scaffold-43719	9602	12881	Rust resistance kinase Lr10
AGROCRI.3P.000133.1	3P.scaffold-43719	13689	16156	Protein of unknown function
AGROCRI.3P.000134.1	3P.scaffold-43719	18479	26285	Protein of unknown function
AGROCRI.3P.000135.1	3P.scaffold-12446	7409	24249	Protein of unknown function
AGROCRI.3P.000136.1	3P.scaffold-4238	997	5318	Protein of unknown function
AGROCRI.3P.000137.1	3P.scaffold-4238	6866	8575	Protein of unknown function
AGROCRI.3P.000138.1	3P.scaffold-4238	9239	12755	Protein of unknown function
AGROCRI.3P.000139.1	3P.scaffold-5462	599	17285	Protein of unknown function
AGROCRI.3P.000140.1	3P.scaffold-7685	2448	5162	Protein of unknown function
AGROCRI.3P.000141.1	3P.scaffold-7685	5936	11530	Protein of unknown function
AGROCRI.3P.000142.1	3P.scaffold-7685	16091	19698	Protein of unknown function
AGROCRI.3P.000143.1	3P.scaffold-7685	37563	38852	Protein of unknown function
AGROCRI.3P.000144.1	3P.scaffold-103167	1143	4374	Protein of unknown function
AGROCRI.3P.000145.1	3P.scaffold-103167	4957	6339	Protein of unknown function
AGROCRI.3P.000146.1	3P.scaffold-103167	7124	10029	Protein of unknown function
AGROCRI.3P.000147.1	3P.scaffold-103167	13208	14619	Protein of unknown function
AGROCRI.3P.000148.1	3P.scaffold-103167	16416	17618	Protein of unknown function
AGROCRI.3P.000149.1	3P.scaffold-103167	19758	22627	Protein of unknown function
AGROCRI.3P.000150.1	3P.scaffold-4266	1946	4799	Protein of unknown function
AGROCRI.3P.000151.1	3P.scaffold-4266	5210	9911	Developmentally-regulated G-protein 2
AGROCRI.3P.000152.1	3P.scaffold-4266	13669	20059	Protein of unknown function
AGROCRI.3P.000153.1	3P.scaffold-7370	3124	13908	Protein of unknown function
AGROCRI.3P.000154.1	3P.scaffold-29470	1120	1603	Protein of unknown function
AGROCRI.3P.000155.1	3P.scaffold-29470	2669	3052	Protein of unknown function
AGROCRI.3P.000156.1	3P.scaffold-29470	4253	10979	Protein of unknown function
AGROCRI.3P.000157.1	3P.scaffold-29470	14168	17860	Kinesin-like protein KIN-13B
AGROCRI.3P.000158.1	3P.scaffold-29470	23139	23564	Protein of unknown function
AGROCRI.3P.000159.1	3P.scaffold-37	2300	3342	Protein of unknown function
AGROCRI.3P.000160.1	3P.scaffold-37	6735	11893	Protein of unknown function
AGROCRI.3P.000161.1	3P.scaffold-37	12811	18801	Protein of unknown function
AGROCRI.3P.000162.1	3P.scaffold-202125	3041	9239	Probable LRR receptor-like serine/threonine-protein kinase At1g06840
AGROCRI.3P.000163.1	3P.scaffold-202125	18680	21091	Protein of unknown function
AGROCRI.3P.000164.1	3P.scaffold-202125	21549	22585	Protein of unknown function
AGROCRI.3P.000165.1	3P.scaffold-4239	436	10973	Acetyl-CoA carboxylase 1
AGROCRI.3P.000166.1	3P.scaffold-4757	3045	6216	Protein of unknown function
AGROCRI.3P.000167.1	3P.scaffold-4757	7831	10685	Protein of unknown function
AGROCRI.3P.000168.1	3P.scaffold-4757	13044	20896	Histone deacetylase HDT2
AGROCRI.3P.000169.1	3P.scaffold-4581	479	4695	Protein of unknown function
AGROCRI.3P.000170.1	3P.scaffold-4581	5370	8857	DNA damage-binding protein 2
AGROCRI.3P.000171.1	3P.scaffold-4581	9169	10029	Protein of unknown function
AGROCRI.3P.000172.1	3P.scaffold-201084	2803	3348	Protein of unknown function
AGROCRI.3P.000173.1	3P.scaffold-201084	3957	11704	Probable chromatin-remodeling complex ATPase chain
AGROCRI.3P.000174.1	3P.scaffold-4296	373	3329	Peptidyl serine alpha-galactosyltransferase
AGROCRI.3P.000175.1	3P.scaffold-4296	5336	14215	Structural maintenance of chromosomes protein 2-1
AGROCRI.3P.000176.1	3P.scaffold-13151	4149	4842	Protein of unknown function
AGROCRI.3P.000177.1	3P.scaffold-13151	5239	5753	Protein of unknown function
AGROCRI.3P.000178.1	3P.scaffold-13151	6661	8342	Protein of unknown function
AGROCRI.3P.000179.1	3P.scaffold-13151	8360	15037	Protein of unknown function
AGROCRI.3P.000180.1	3P.scaffold-13151	27753	31978	Protein of unknown function
AGROCRI.3P.000181.1	3P.scaffold-10	10811	11575	Protein of unknown function
AGROCRI.3P.000182.1	3P.scaffold-10	14685	26804	Protein of unknown function
AGROCRI.3P.000183.1	3P.scaffold-10	30392	31780	Protein of unknown function
AGROCRI.3P.000184.1	3P.scaffold-5129	1284	6106	Protein of unknown function
AGROCRI.3P.000185.1	3P.scaffold-5129	8740	12541	Protein of unknown function
AGROCRI.3P.000186.1	3P.scaffold-6202	2	4837	Protein of unknown function
AGROCRI.3P.000187.1	3P.scaffold-6202	5179	10836	Tryptophan--tRNA ligase
AGROCRI.3P.000188.1	3P.scaffold-4318	1	312	Protein COFACTOR ASSEMBLY OF COMPLEX C SUBUNIT B CCB3
AGROCRI.3P.000189.1	3P.scaffold-4318	1082	10459	ABC transporter D family member 1
AGROCRI.3P.000190.1	3P.scaffold-133836	1126	3744	Protein of unknown function
AGROCRI.3P.000191.1	3P.scaffold-133836	4428	7732	Protein of unknown function
AGROCRI.3P.000192.1	3P.scaffold-133836	9146	14738	Protein of unknown function
AGROCRI.3P.000193.1	3P.scaffold-4120	2571	7201	Protein of unknown function
AGROCRI.3P.000194.1	3P.scaffold-4120	8925	16822	Protein of unknown function
AGROCRI.3P.000195.1	3P.scaffold-4120	18403	19365	Protein of unknown function
AGROCRI.3P.000196.1	3P.scaffold-2913	1528	4766	Protein of unknown function
AGROCRI.3P.000197.1	3P.scaffold-2913	5126	17910	Protein of unknown function
AGROCRI.3P.000198.1	3P.scaffold-202223	10309	12169	Protein of unknown function
AGROCRI.3P.000199.1	3P.scaffold-202223	13309	22710	Protein of unknown function
AGROCRI.3P.000200.1	3P.scaffold-72598	556	4018	Protein of unknown function
AGROCRI.3P.000201.1	3P.scaffold-72598	4805	8757	NADP-dependent malic enzyme
AGROCRI.3P.000202.1	3P.scaffold-34615	3797	4633	Protein of unknown function
AGROCRI.3P.000203.1	3P.scaffold-34615	7465	8555	Protein of unknown function
AGROCRI.3P.000204.1	3P.scaffold-34615	9812	13579	Protein of unknown function
AGROCRI.3P.000205.1	3P.scaffold-34615	14432	16962	Protein of unknown function
AGROCRI.3P.000206.1	3P.scaffold-34615	17250	21718	Protein of unknown function
AGROCRI.3P.000207.1	3P.scaffold-7486	792	9216	Villin-2
AGROCRI.3P.000208.1	3P.scaffold-7486	10920	11726	Protein of unknown function
AGROCRI.3P.000209.1	3P.scaffold-65749	620	1435	Protein of unknown function
AGROCRI.3P.000210.1	3P.scaffold-65749	2129	13231	Protein of unknown function
AGROCRI.3P.000211.1	3P.scaffold-1419	5560	6114	Protein of unknown function
AGROCRI.3P.000212.1	3P.scaffold-1419	14659	18474	Protein of unknown function
AGROCRI.3P.000213.1	3P.scaffold-1419	19488	20649	Protein of unknown function
AGROCRI.3P.000214.1	3P.scaffold-1419	21235	24473	Protein of unknown function
AGROCRI.3P.000215.1	3P.scaffold-23	1	9728	Protein of unknown function
AGROCRI.3P.000216.1	3P.scaffold-23	11114	11698	Protein of unknown function
AGROCRI.3P.000217.1	3P.scaffold-13250	542	1876	Protein of unknown function
AGROCRI.3P.000218.1	3P.scaffold-13250	2443	7340	Protein of unknown function
AGROCRI.3P.000219.1	3P.scaffold-13250	9253	11633	Protein of unknown function
AGROCRI.3P.000220.1	3P.scaffold-122477	1069	10453	Protein of unknown function
AGROCRI.3P.000221.1	3P.scaffold-122477	11672	15761	Protein of unknown function
AGROCRI.3P.000222.1	3P.scaffold-44101	1	7895	DNA polymerase alpha catalytic subunit
AGROCRI.3P.000223.1	3P.scaffold-202011	4763	15025	Protein TPR1
AGROCRI.3P.000224.1	3P.scaffold-17672	15278	15505	Protein of unknown function
AGROCRI.3P.000225.1	3P.scaffold-17672	15876	24116	Protein of unknown function
AGROCRI.3P.000226.1	3P.scaffold-109281	34959	39010	Auxin response factor 4
AGROCRI.3P.000227.1	3P.scaffold-109281	42516	46798	Aspartokinase 1
AGROCRI.3P.000228.1	3P.scaffold-3951	544	969	Protein of unknown function
AGROCRI.3P.000229.1	3P.scaffold-3951	2361	11525	Protein of unknown function
AGROCRI.3P.000230.1	3P.scaffold-202324	6282	9613	Probable auxin efflux carrier component 5a
AGROCRI.3P.000231.1	3P.scaffold-202324	7777	15448	Protein of unknown function
AGROCRI.3P.000232.1	3P.scaffold-202324	11478	12161	Probable auxin efflux carrier component 5a
AGROCRI.3P.000233.1	3P.scaffold-7176	329	1525	Protein of unknown function
AGROCRI.3P.000234.1	3P.scaffold-7176	9900	10624	Protein of unknown function
AGROCRI.3P.000235.1	3P.scaffold-7176	26637	27269	Protein of unknown function
AGROCRI.3P.000236.1	3P.scaffold-7176	28699	32136	Protein of unknown function
AGROCRI.3P.000237.1	3P.scaffold-7176	34128	37311	Protein of unknown function
AGROCRI.3P.000238.1	3P.scaffold-5893	104	2762	Protein of unknown function
AGROCRI.3P.000239.1	3P.scaffold-5893	3692	6425	Protein of unknown function
AGROCRI.3P.000240.1	3P.scaffold-5893	8340	9382	Protein of unknown function
AGROCRI.3P.000241.1	3P.scaffold-4350	82	4411	Zinc finger CCCH domain-containing protein 4
AGROCRI.3P.000242.1	3P.scaffold-4350	6291	11190	Protein of unknown function
AGROCRI.3P.000243.1	3P.scaffold-4350	13040	13384	Protein of unknown function
AGROCRI.3P.000244.1	3P.scaffold-4350	14493	14837	Protein of unknown function
AGROCRI.3P.000245.1	3P.scaffold-13587	5112	8510	Protein of unknown function
AGROCRI.3P.000246.1	3P.scaffold-13587	9022	10224	Protein MAO HUZI 4
AGROCRI.3P.000247.1	3P.scaffold-13587	11168	16069	Protein of unknown function
AGROCRI.3P.000248.1	3P.scaffold-4256	3713	6700	Cysteine synthase
AGROCRI.3P.000249.1	3P.scaffold-4256	7646	13401	Protein of unknown function
AGROCRI.3P.000250.1	3P.scaffold-4256	15988	18820	DNA-damage-repair/toleration protein DRT111
AGROCRI.3P.000251.1	3P.scaffold-156906	3903	7102	E3 ubiquitin-protein ligase RGLG3
AGROCRI.3P.000252.1	3P.scaffold-156906	10421	10789	Protein of unknown function
AGROCRI.3P.000253.1	3P.scaffold-156906	15515	20010	Protein of unknown function
AGROCRI.3P.000254.1	3P.scaffold-5826	626	2439	Protein of unknown function
AGROCRI.3P.000255.1	3P.scaffold-5826	5590	6141	Protein of unknown function
AGROCRI.3P.000256.1	3P.scaffold-5826	10169	15136	Protein of unknown function
AGROCRI.3P.000257.1	3P.scaffold-5826	18364	19557	Protein of unknown function
AGROCRI.3P.000258.1	3P.scaffold-76079	1	1217	Protein of unknown function
AGROCRI.3P.000259.1	3P.scaffold-76079	1779	2937	Protein of unknown function
AGROCRI.3P.000260.1	3P.scaffold-76079	3907	4797	Protein of unknown function
AGROCRI.3P.000261.1	3P.scaffold-76079	5102	7718	Protein of unknown function
AGROCRI.3P.000262.1	3P.scaffold-76079	9988	11399	Protein of unknown function
AGROCRI.3P.000263.1	3P.scaffold-76079	13196	14398	Protein of unknown function
AGROCRI.3P.000264.1	3P.scaffold-79104	104	1081	Protein of unknown function
AGROCRI.3P.000265.1	3P.scaffold-79104	2547	8700	Protein of unknown function
AGROCRI.3P.000266.1	3P.scaffold-79104	11470	12674	Protein of unknown function
AGROCRI.3P.000267.1	3P.scaffold-9525	2616	3237	Protein of unknown function
AGROCRI.3P.000268.1	3P.scaffold-9525	4778	8231	Protein of unknown function
AGROCRI.3P.000269.1	3P.scaffold-9525	9133	12259	Protein of unknown function
AGROCRI.3P.000270.1	3P.scaffold-54041	5239	6834	Protein of unknown function
AGROCRI.3P.000271.1	3P.scaffold-54041	10530	16515	Protein of unknown function
AGROCRI.3P.000272.1	3P.scaffold-54041	24544	27315	Protein of unknown function
AGROCRI.3P.000273.1	3P.scaffold-54041	30756	32075	Protein of unknown function
AGROCRI.3P.000274.1	3P.scaffold-54041	33299	34828	Protein of unknown function
AGROCRI.3P.000275.1	3P.scaffold-135892	16238	21655	Protein of unknown function
AGROCRI.3P.000276.1	3P.scaffold-135892	22384	25578	Protein of unknown function
AGROCRI.3P.000277.1	3P.scaffold-16776	250	5787	Protein of unknown function
AGROCRI.3P.000278.1	3P.scaffold-16776	6749	16908	Protein of unknown function
AGROCRI.3P.000279.1	3P.scaffold-4135	2560	4183	Protein of unknown function
AGROCRI.3P.000280.1	3P.scaffold-4135	8253	17695	Protein of unknown function
AGROCRI.3P.000281.1	3P.scaffold-13860	100	120	Protein of unknown function
AGROCRI.3P.000282.1	3P.scaffold-13860	403	1716	Protein of unknown function
AGROCRI.3P.000283.1	3P.scaffold-13860	4340	12847	Protein of unknown function
AGROCRI.3P.000284.1	3P.scaffold-4178	6919	21657	Protein of unknown function
AGROCRI.3P.000285.1	3P.scaffold-12822	119	346	Protein of unknown function
AGROCRI.3P.000286.1	3P.scaffold-12822	6025	9230	Protein of unknown function
AGROCRI.3P.000287.1	3P.scaffold-12822	9555	14828	Protein of unknown function
AGROCRI.3P.000288.1	3P.scaffold-17758	945	4153	Protein of unknown function
AGROCRI.3P.000289.1	3P.scaffold-17758	4761	14093	Protein of unknown function
AGROCRI.3P.000290.1	3P.scaffold-23999	1860	2718	Protein of unknown function
AGROCRI.3P.000291.1	3P.scaffold-23999	5022	13469	Protein of unknown function
AGROCRI.3P.000292.1	3P.scaffold-23564	1302	3420	Protein of unknown function
AGROCRI.3P.000293.1	3P.scaffold-23564	4722	12792	Protein of unknown function
AGROCRI.3P.000294.1	3P.scaffold-4153	1582	5172	Protein of unknown function
AGROCRI.3P.000295.1	3P.scaffold-4153	5485	12993	Protein of unknown function
AGROCRI.3P.000296.1	3P.scaffold-78515	359	3628	Protein of unknown function
AGROCRI.3P.000297.1	3P.scaffold-78515	7726	10915	Protein of unknown function
AGROCRI.3P.000298.1	3P.scaffold-78515	12395	17708	Protein of unknown function
AGROCRI.3P.000299.1	3P.scaffold-3410	7768	9802	Protein of unknown function
AGROCRI.3P.000300.1	3P.scaffold-3410	11786	21079	Protein of unknown function
AGROCRI.3P.000301.1	3P.scaffold-35228	9083	21704	Protein SUBSTANDARD STARCH GRAIN 4
AGROCRI.3P.000302.1	3P.scaffold-201740	3787	5676	Protein of unknown function
AGROCRI.3P.000303.1	3P.scaffold-201740	6243	9388	Protein of unknown function
AGROCRI.3P.000304.1	3P.scaffold-201740	9581	16368	Protein of unknown function
AGROCRI.3P.000305.1	3P.scaffold-22609	4792	16279	Protein of unknown function
AGROCRI.3P.000306.1	3P.scaffold-111756	9112	10097	Protein of unknown function
AGROCRI.3P.000307.1	3P.scaffold-111756	12515	21583	Protein of unknown function
AGROCRI.3P.000308.1	3P.scaffold-111756	22765	24826	Protein of unknown function
AGROCRI.3P.000309.1	3P.scaffold-4207	674	9920	Protein of unknown function
AGROCRI.3P.000310.1	3P.scaffold-4157	2344	3555	Protein of unknown function
AGROCRI.3P.000311.1	3P.scaffold-4157	5668	19035	Inositol hexakisphosphate and diphosphoinositol-pentakisphosphate kinase VIP2
AGROCRI.3P.000312.1	3P.scaffold-4292	3705	12309	Leucine--tRNA ligase
AGROCRI.3P.000313.1	3P.scaffold-4292	13172	14420	Protein of unknown function
AGROCRI.3P.000314.1	3P.scaffold-198990	2853	3164	Protein of unknown function
AGROCRI.3P.000315.1	3P.scaffold-198990	3429	3650	Protein of unknown function
AGROCRI.3P.000316.1	3P.scaffold-198990	4657	6920	Protein of unknown function
AGROCRI.3P.000317.1	3P.scaffold-198990	8855	13611	Diacylglycerol kinase 5
AGROCRI.3P.000318.1	3P.scaffold-199082	5219	10816	Protein of unknown function
AGROCRI.3P.000319.1	3P.scaffold-15967	196	513	Protein of unknown function
AGROCRI.3P.000320.1	3P.scaffold-15967	774	1244	Protein of unknown function
AGROCRI.3P.000321.1	3P.scaffold-15967	888	4795	Protein of unknown function
AGROCRI.3P.000322.1	3P.scaffold-15967	9747	11021	Protein of unknown function
AGROCRI.3P.000323.1	3P.scaffold-15967	12421	12757	Protein of unknown function
AGROCRI.3P.000324.1	3P.scaffold-15967	14089	14487	Protein of unknown function
AGROCRI.3P.000325.1	3P.scaffold-15967	16180	18817	Protein of unknown function
AGROCRI.3P.000326.1	3P.scaffold-176297	2083	4554	Protein of unknown function
AGROCRI.3P.000327.1	3P.scaffold-176297	9312	18383	Protein of unknown function
AGROCRI.3P.000328.1	3P.scaffold-3642	939	1954	Protein of unknown function
AGROCRI.3P.000329.1	3P.scaffold-3642	2045	3752	Protein of unknown function
AGROCRI.3P.000330.1	3P.scaffold-3642	4698	4973	Protein of unknown function
AGROCRI.3P.000331.1	3P.scaffold-3642	7037	10841	Protein of unknown function
AGROCRI.3P.000332.1	3P.scaffold-52944	7850	10463	UDP-xylose transporter 3
AGROCRI.3P.000333.1	3P.scaffold-52944	11783	15617	Protein of unknown function
AGROCRI.3P.000334.1	3P.scaffold-3666	26321	26677	Protein of unknown function
AGROCRI.3P.000335.1	3P.scaffold-3666	31315	38739	Kinesin-like protein KIN-14C
AGROCRI.3P.000336.1	3P.scaffold-146372	661	1597	Protein of unknown function
AGROCRI.3P.000337.1	3P.scaffold-146372	3219	11815	Protein of unknown function
AGROCRI.3P.000338.1	3P.scaffold-4202	81	13637	Protein of unknown function
AGROCRI.3P.000339.1	3P.scaffold-5946	194	6578	Protein of unknown function
AGROCRI.3P.000340.1	3P.scaffold-5946	11171	12358	DEAD-box ATP-dependent RNA helicase 56
AGROCRI.3P.000341.1	3P.scaffold-5946	13802	16949	DEAD-box ATP-dependent RNA helicase 56
AGROCRI.3P.000342.1	3P.scaffold-12330	4857	8761	Protein of unknown function
AGROCRI.3P.000343.1	3P.scaffold-12330	13519	17053	Protein of unknown function
AGROCRI.3P.000344.1	3P.scaffold-138540	2013	5043	Protein of unknown function
AGROCRI.3P.000345.1	3P.scaffold-138540	6097	11293	Protein of unknown function
AGROCRI.3P.000346.1	3P.scaffold-35432	1395	3232	Protein of unknown function
AGROCRI.3P.000347.1	3P.scaffold-35432	3689	10308	Protein of unknown function
AGROCRI.3P.000348.1	3P.scaffold-145621	1074	1574	Protein of unknown function
AGROCRI.3P.000349.1	3P.scaffold-145621	2120	5821	Protein of unknown function
AGROCRI.3P.000350.1	3P.scaffold-145621	6778	11928	Protein of unknown function
AGROCRI.3P.000351.1	3P.scaffold-5390	1994	12479	Protein of unknown function
AGROCRI.3P.000352.1	3P.scaffold-134596	10076	17619	Protein of unknown function
AGROCRI.3P.000353.1	3P.scaffold-134596	19178	20561	Protein of unknown function
AGROCRI.3P.000354.1	3P.scaffold-201086	2	3111	Protein of unknown function
AGROCRI.3P.000355.1	3P.scaffold-201086	3470	9847	Protein of unknown function
AGROCRI.3P.000356.1	3P.scaffold-76845	5346	6926	Protein of unknown function
AGROCRI.3P.000357.1	3P.scaffold-76845	9760	20119	Protein of unknown function
AGROCRI.3P.000358.1	3P.scaffold-20575	5276	8343	Protein of unknown function
AGROCRI.3P.000359.1	3P.scaffold-20575	11626	15060	Protein of unknown function
AGROCRI.3P.000360.1	3P.scaffold-20575	16523	17140	Protein of unknown function
AGROCRI.3P.000361.1	3P.scaffold-4235	1862	12852	Protein of unknown function
AGROCRI.3P.000362.1	3P.scaffold-4124	2560	7972	Transcriptional corepressor LEUNIG
AGROCRI.3P.000363.1	3P.scaffold-4124	10075	10704	Protein of unknown function
AGROCRI.3P.000364.1	3P.scaffold-4124	10924	13137	Transcriptional corepressor LEUNIG
AGROCRI.3P.000365.1	3P.scaffold-4124	13883	16437	Protein of unknown function
AGROCRI.3P.000366.1	3P.scaffold-4219	6957	17340	Protein of unknown function
AGROCRI.3P.000367.1	3P.scaffold-4183	2294	12059	ABC transporter G family member 31
AGROCRI.3P.000368.1	3P.scaffold-201397	2	673	Protein of unknown function
AGROCRI.3P.000369.1	3P.scaffold-201397	1494	5980	Protein of unknown function
AGROCRI.3P.000370.1	3P.scaffold-201397	7179	7865	Protein of unknown function
AGROCRI.3P.000371.1	3P.scaffold-201397	9436	10842	Protein of unknown function
AGROCRI.3P.000372.1	3P.scaffold-4450	3664	5264	Protein of unknown function
AGROCRI.3P.000373.1	3P.scaffold-4450	7123	7521	Protein of unknown function
AGROCRI.3P.000374.1	3P.scaffold-4450	8747	9865	Protein of unknown function
AGROCRI.3P.000375.1	3P.scaffold-4450	14647	14940	Protein of unknown function
AGROCRI.3P.000376.1	3P.scaffold-4450	16876	18198	Protein of unknown function
AGROCRI.3P.000377.1	3P.scaffold-4450	20370	24231	E3 ubiquitin-protein ligase BRE1-like 2
AGROCRI.3P.000378.1	3P.scaffold-17089	887	18809	Heat shock 70 kDa protein 9
AGROCRI.3P.000379.1	3P.scaffold-201209	3820	5178	Protein PIN-LIKES 2
AGROCRI.3P.000380.1	3P.scaffold-201209	6754	8505	Protein DEHYDRATION-INDUCED 19 homolog 5
AGROCRI.3P.000381.1	3P.scaffold-201209	9017	12083	Protein of unknown function
AGROCRI.3P.000382.1	3P.scaffold-200665	8451	14091	Protein of unknown function
AGROCRI.3P.000383.1	3P.scaffold-201993	16165	26159	Protein of unknown function
AGROCRI.3P.000384.1	3P.scaffold-201993	29221	30791	Protein of unknown function
AGROCRI.3P.000385.1	3P.scaffold-201993	33333	34914	Protein of unknown function
AGROCRI.3P.000386.1	3P.scaffold-201993	38973	43214	Protein of unknown function
AGROCRI.3P.000387.1	3P.scaffold-98744	8684	14354	Protein of unknown function
AGROCRI.3P.000388.1	3P.scaffold-98744	18385	19759	Transcription initiation factor TFIID subunit 9
AGROCRI.3P.000389.1	3P.scaffold-175481	1	3330	Protein of unknown function
AGROCRI.3P.000390.1	3P.scaffold-175481	4028	4456	Protein of unknown function
AGROCRI.3P.000391.1	3P.scaffold-175481	5423	6560	Protein of unknown function
AGROCRI.3P.000392.1	3P.scaffold-175481	7346	7972	Protein of unknown function
AGROCRI.3P.000393.1	3P.scaffold-13007	621	6246	Protein-ribulosamine 3-kinase
AGROCRI.3P.000394.1	3P.scaffold-13007	7459	9546	Probable staphylococcal-like nuclease CAN1
AGROCRI.3P.000395.1	3P.scaffold-9841	18949	19800	Protein of unknown function
AGROCRI.3P.000396.1	3P.scaffold-9841	31311	36062	Protein of unknown function
AGROCRI.3P.000397.1	3P.scaffold-9841	40407	44254	Protein of unknown function
AGROCRI.3P.000398.1	3P.scaffold-40	298	3654	Protein of unknown function
AGROCRI.3P.000399.1	3P.scaffold-40	5062	14555	Protein of unknown function
AGROCRI.3P.000400.1	3P.scaffold-201144	154	2650	Protein of unknown function
AGROCRI.3P.000401.1	3P.scaffold-201144	8849	19066	Protein of unknown function
AGROCRI.3P.000402.1	3P.scaffold-4143	1	8690	RNA polymerase II C-terminal domain phosphatase-like 2
AGROCRI.3P.000403.1	3P.scaffold-4143	10128	11516	Protein of unknown function
AGROCRI.3P.000404.1	3P.scaffold-133109	887	20722	Heat shock 70 kDa protein 9
AGROCRI.3P.000405.1	3P.scaffold-4122	1437	2105	Protein of unknown function
AGROCRI.3P.000406.1	3P.scaffold-4122	5266	16635	Ubiquitin carboxyl-terminal hydrolase 14
AGROCRI.3P.000407.1	3P.scaffold-199497	2	313	Protein of unknown function
AGROCRI.3P.000408.1	3P.scaffold-199497	566	1991	Protein of unknown function
AGROCRI.3P.000409.1	3P.scaffold-199497	3332	7242	Protein of unknown function
AGROCRI.3P.000410.1	3P.scaffold-199497	7573	10141	Protein of unknown function
AGROCRI.3P.000411.1	3P.scaffold-4234	4154	9974	Protein of unknown function
AGROCRI.3P.000412.1	3P.scaffold-47440	2309	2992	Protein of unknown function
AGROCRI.3P.000413.1	3P.scaffold-47440	5153	9436	Protein of unknown function
AGROCRI.3P.000414.1	3P.scaffold-47440	15479	16722	Protein of unknown function
AGROCRI.3P.000415.1	3P.scaffold-47440	20097	22175	Protein of unknown function
AGROCRI.3P.000416.1	3P.scaffold-201409	4600	9034	DNA replication licensing factor MCM4
AGROCRI.3P.000417.1	3P.scaffold-201409	31983	32318	Protein of unknown function
AGROCRI.3P.000418.1	3P.scaffold-201725	1	16178	Protein of unknown function
AGROCRI.3P.000419.1	3P.scaffold-105926	2411	3340	Protein of unknown function
AGROCRI.3P.000420.1	3P.scaffold-105926	4007	8308	Protein of unknown function
AGROCRI.3P.000421.1	3P.scaffold-105926	10604	13441	Protein of unknown function
AGROCRI.3P.000422.1	3P.scaffold-201059	6225	9916	Protein of unknown function
AGROCRI.3P.000423.1	3P.scaffold-201059	11478	15740	Protein of unknown function
AGROCRI.3P.000424.1	3P.scaffold-5948	141	24498	Probable RNA-dependent RNA polymerase 3
AGROCRI.3P.000425.1	3P.scaffold-4466	4223	9549	Protein of unknown function
AGROCRI.3P.000426.1	3P.scaffold-73625	1686	3353	Protein of unknown function
AGROCRI.3P.000427.1	3P.scaffold-73625	4641	8454	Protein of unknown function
AGROCRI.3P.000428.1	3P.scaffold-73625	11758	14790	Protein of unknown function
AGROCRI.3P.000429.1	3P.scaffold-33548	762	8662	Protein of unknown function
AGROCRI.3P.000430.1	3P.scaffold-66	2368	7726	NADP-dependent malic enzyme
AGROCRI.3P.000431.1	3P.scaffold-199845	1276	1629	Protein of unknown function
AGROCRI.3P.000432.1	3P.scaffold-199845	2949	6966	Homeobox-leucine zipper protein HOX29
AGROCRI.3P.000433.1	3P.scaffold-199845	9855	10117	Protein of unknown function
AGROCRI.3P.000434.1	3P.scaffold-4159	198	14657	Protein of unknown function
AGROCRI.3P.000435.1	3P.scaffold-4449	4646	23714	Protein of unknown function
AGROCRI.3P.000436.1	3P.scaffold-6706	2471	7294	Protein of unknown function
AGROCRI.3P.000437.1	3P.scaffold-6706	13543	17755	SPX domain-containing membrane protein Os02g45520
AGROCRI.3P.000438.1	3P.scaffold-82574	9336	11510	Protein of unknown function
AGROCRI.3P.000439.1	3P.scaffold-82574	16770	21154	Protein of unknown function
AGROCRI.3P.000440.1	3P.scaffold-82574	27155	31758	External alternative NAD(P)H-ubiquinone oxidoreductase B3
AGROCRI.3P.000441.1	3P.scaffold-4928	13725	17186	Protein of unknown function
AGROCRI.3P.000442.1	3P.scaffold-4928	17763	18303	Protein of unknown function
AGROCRI.3P.000443.1	3P.scaffold-4928	19096	29579	Ubiquitin-conjugating enzyme E2 36
AGROCRI.3P.000444.1	3P.scaffold-6873	326	2136	Protein of unknown function
AGROCRI.3P.000445.1	3P.scaffold-6873	7534	9948	Protein of unknown function
AGROCRI.3P.000446.1	3P.scaffold-6873	16697	18774	Protein of unknown function
AGROCRI.3P.000447.1	3P.scaffold-118252	9112	10097	Protein of unknown function
AGROCRI.3P.000448.1	3P.scaffold-118252	16074	21640	Protein of unknown function
AGROCRI.3P.000449.1	3P.scaffold-118252	22767	24828	Protein of unknown function
AGROCRI.3P.000450.1	3P.scaffold-201195	24217	32907	Protein of unknown function
AGROCRI.3P.000451.1	3P.scaffold-201195	34714	36648	Protein of unknown function
AGROCRI.3P.000452.1	3P.scaffold-4534	320	7830	Protein of unknown function
AGROCRI.3P.000453.1	3P.scaffold-14363	7697	11701	Protein of unknown function
AGROCRI.3P.000454.1	3P.scaffold-14363	12726	19429	Protein of unknown function
AGROCRI.3P.000455.1	3P.scaffold-5221	5165	11887	ABC transporter G family member 36
AGROCRI.3P.000456.1	3P.scaffold-4837	1021	7615	Myosin-17
AGROCRI.3P.000457.1	3P.scaffold-5372	737	9110	Protein of unknown function
AGROCRI.3P.000458.1	3P.scaffold-4623	1224	1946	Protein of unknown function
AGROCRI.3P.000459.1	3P.scaffold-4623	2724	7891	Serine/threonine-protein kinase Nek5
AGROCRI.3P.000460.1	3P.scaffold-4623	14640	15374	Protein of unknown function
AGROCRI.3P.000461.1	3P.scaffold-4623	16233	17474	Protein of unknown function
AGROCRI.3P.000462.1	3P.scaffold-8066	11702	13558	40S ribosomal protein S24-2
AGROCRI.3P.000463.1	3P.scaffold-8066	14124	15620	Protein of unknown function
AGROCRI.3P.000464.1	3P.scaffold-8066	16388	19573	Protein of unknown function
AGROCRI.3P.000465.1	3P.scaffold-4289	9069	12784	Protein of unknown function
AGROCRI.3P.000466.1	3P.scaffold-4289	13448	18800	Protein of unknown function
AGROCRI.3P.000467.1	3P.scaffold-4305	578	886	Protein of unknown function
AGROCRI.3P.000468.1	3P.scaffold-4305	3016	4410	CBL-interacting protein kinase 5
AGROCRI.3P.000469.1	3P.scaffold-4305	6397	10204	Protein of unknown function
AGROCRI.3P.000470.1	3P.scaffold-4305	12135	12417	Multiprotein-bridging factor 1a
AGROCRI.3P.000471.1	3P.scaffold-1394	5378	6868	Protein of unknown function
AGROCRI.3P.000472.1	3P.scaffold-1394	8005	11024	Protein of unknown function
AGROCRI.3P.000473.1	3P.scaffold-1394	16073	17196	Protein of unknown function
AGROCRI.3P.000474.1	3P.scaffold-1394	21324	21620	Protein of unknown function
AGROCRI.3P.000475.1	3P.scaffold-1394	21821	22471	Protein of unknown function
AGROCRI.3P.000476.1	3P.scaffold-39548	1457	5077	Protein of unknown function
AGROCRI.3P.000477.1	3P.scaffold-39548	5102	9953	Protein of unknown function
AGROCRI.3P.000478.1	3P.scaffold-39548	10891	11358	Protein of unknown function
AGROCRI.3P.000479.1	3P.scaffold-4387	2359	2697	Protein of unknown function
AGROCRI.3P.000480.1	3P.scaffold-4387	9186	13051	Protein of unknown function
AGROCRI.3P.000481.1	3P.scaffold-4387	16265	18634	Protein of unknown function
AGROCRI.3P.000482.1	3P.scaffold-4349	9	566	Protein of unknown function
AGROCRI.3P.000483.1	3P.scaffold-4349	2420	9948	Protein of unknown function
AGROCRI.3P.000484.1	3P.scaffold-4502	1737	6746	Potassium channel AKT1
AGROCRI.3P.000485.1	3P.scaffold-4502	8838	11405	Protein of unknown function
AGROCRI.3P.000486.1	3P.scaffold-4217	4892	16863	Protein VACUOLELESS1
AGROCRI.3P.000487.1	3P.scaffold-61	2052	3342	Protein of unknown function
AGROCRI.3P.000488.1	3P.scaffold-61	9154	14083	5'-methylthioadenosine/S-adenosylhomocysteine nucleosidase 1
AGROCRI.3P.000489.1	3P.scaffold-61	14780	15316	Protein of unknown function
AGROCRI.3P.000490.1	3P.scaffold-61	15487	17869	Protein of unknown function
AGROCRI.3P.000491.1	3P.scaffold-16896	4957	7776	Protein of unknown function
AGROCRI.3P.000492.1	3P.scaffold-16896	18501	23262	Protein of unknown function
AGROCRI.3P.000493.1	3P.scaffold-4921	5	1039	Protein of unknown function
AGROCRI.3P.000494.1	3P.scaffold-4921	1958	3601	Protein of unknown function
AGROCRI.3P.000495.1	3P.scaffold-4921	5737	7223	Protein of unknown function
AGROCRI.3P.000496.1	3P.scaffold-6081	1263	3982	Cyclin-dependent kinase C-2
AGROCRI.3P.000497.1	3P.scaffold-6081	4573	5816	Cell division protein FtsY homolog
AGROCRI.3P.000498.1	3P.scaffold-6651	388	7356	Protein of unknown function
AGROCRI.3P.000499.1	3P.scaffold-6651	8399	10803	Protein of unknown function
AGROCRI.3P.000500.1	3P.scaffold-195604	27624	28428	Protein of unknown function
AGROCRI.3P.000501.1	3P.scaffold-195604	30127	35965	Protein of unknown function
AGROCRI.3P.000502.1	3P.scaffold-195604	40050	41241	Protein of unknown function
AGROCRI.3P.000503.1	3P.scaffold-6498	5237	9027	Protein of unknown function
AGROCRI.3P.000504.1	3P.scaffold-6498	15994	20303	Protein of unknown function
AGROCRI.3P.000505.1	3P.scaffold-11765	1	9695	E3 ubiquitin-protein ligase BRE1-like 2
AGROCRI.3P.000506.1	3P.scaffold-4137	3057	13435	Protein of unknown function
AGROCRI.3P.000507.1	3P.scaffold-35985	15118	22079	Protein of unknown function
AGROCRI.3P.000508.1	3P.scaffold-35985	22558	25929	Protein of unknown function
AGROCRI.3P.000509.1	3P.scaffold-5351	1584	2672	Protein of unknown function
AGROCRI.3P.000510.1	3P.scaffold-5351	4062	10486	Protein of unknown function
AGROCRI.3P.000511.1	3P.scaffold-4152	12291	16306	Beta-hexosaminidase 3
AGROCRI.3P.000512.1	3P.scaffold-4152	17702	19950	TPR repeat-containing protein ZIP4
AGROCRI.3P.000513.1	3P.scaffold-7246	5514	16996	Protein of unknown function
AGROCRI.3P.000514.1	3P.scaffold-4695	121	6348	Protein of unknown function
AGROCRI.3P.000515.1	3P.scaffold-199467	3223	5367	Rop guanine nucleotide exchange factor 11
AGROCRI.3P.000516.1	3P.scaffold-199467	8149	11437	Aspartate aminotransferase
AGROCRI.3P.000517.1	3P.scaffold-19391	1025	6753	Protein of unknown function
AGROCRI.3P.000518.1	3P.scaffold-19391	9498	13668	Protein of unknown function
AGROCRI.3P.000519.1	3P.scaffold-214	984	1579	16.6 kDa heat shock protein
AGROCRI.3P.000520.1	3P.scaffold-214	1613	1876	16.6 kDa heat shock protein
AGROCRI.3P.000521.1	3P.scaffold-214	7629	12174	ATP-dependent 6-phosphofructokinase 3
AGROCRI.3P.000522.1	3P.scaffold-198523	626	9491	Protein of unknown function
AGROCRI.3P.000523.1	3P.scaffold-198523	11703	12614	Protein of unknown function
AGROCRI.3P.000524.1	3P.scaffold-31291	2509	4036	Protein of unknown function
AGROCRI.3P.000525.1	3P.scaffold-31291	4562	6910	Protein of unknown function
AGROCRI.3P.000526.1	3P.scaffold-31291	11740	13257	Protein of unknown function
AGROCRI.3P.000527.1	3P.scaffold-31291	14794	18645	Protein of unknown function
AGROCRI.3P.000528.1	3P.scaffold-4880	255	6298	Protein of unknown function
AGROCRI.3P.000529.1	3P.scaffold-4880	10255	12111	Protein of unknown function
AGROCRI.3P.000530.1	3P.scaffold-65180	236	1695	Protein of unknown function
AGROCRI.3P.000531.1	3P.scaffold-65180	2089	3369	Protein of unknown function
AGROCRI.3P.000532.1	3P.scaffold-65180	4460	11239	Protein of unknown function
AGROCRI.3P.000533.1	3P.scaffold-20827	5367	13247	Protein of unknown function
AGROCRI.3P.000534.1	3P.scaffold-20827	14718	15419	Protein of unknown function
AGROCRI.3P.000535.1	3P.scaffold-6399	3677	5670	Very-long-chain (3R)-3-hydroxyacyl-CoA dehydratase PASTICCINO 2A
AGROCRI.3P.000536.1	3P.scaffold-6399	5912	9552	Protein of unknown function
AGROCRI.3P.000537.1	3P.scaffold-4838	1873	7731	ABC transporter G family member 37
AGROCRI.3P.000538.1	3P.scaffold-10326	6705	8601	Photosystem II 22 kDa protein 1
AGROCRI.3P.000539.1	3P.scaffold-10326	12349	17938	Protein of unknown function
AGROCRI.3P.000540.1	3P.scaffold-1056	6879	13771	Protein of unknown function
AGROCRI.3P.000541.1	3P.scaffold-1056	18444	20535	Protein of unknown function
AGROCRI.3P.000542.1	3P.scaffold-4262	537	1358	Protein of unknown function
AGROCRI.3P.000543.1	3P.scaffold-4262	11423	19037	Protein of unknown function
AGROCRI.3P.000544.1	3P.scaffold-6211	10779	15173	Protein of unknown function
AGROCRI.3P.000545.1	3P.scaffold-6211	18768	20697	Protein of unknown function
AGROCRI.3P.000546.1	3P.scaffold-6211	20943	22492	Protein of unknown function
AGROCRI.3P.000547.1	3P.scaffold-4218	7695	11072	Protein of unknown function
AGROCRI.3P.000548.1	3P.scaffold-4218	12686	19297	Splicing factor SF3a60 homolog
AGROCRI.3P.000549.1	3P.scaffold-196	797	1913	Protein of unknown function
AGROCRI.3P.000550.1	3P.scaffold-196	11067	12902	Protein of unknown function
AGROCRI.3P.000551.1	3P.scaffold-196	17963	19167	Protein of unknown function
AGROCRI.3P.000552.1	3P.scaffold-196	20249	22396	Protein of unknown function
AGROCRI.3P.000553.1	3P.scaffold-196	23350	24036	Protein of unknown function
AGROCRI.3P.000554.1	3P.scaffold-201425	5523	8333	Protein of unknown function
AGROCRI.3P.000555.1	3P.scaffold-201425	9799	12953	Probable anion transporter 3
AGROCRI.3P.000556.1	3P.scaffold-201425	14747	15034	Protein of unknown function
AGROCRI.3P.000557.1	3P.scaffold-6413	368	8490	Protein of unknown function
AGROCRI.3P.000558.1	3P.scaffold-92490	11241	11921	Protein of unknown function
AGROCRI.3P.000559.1	3P.scaffold-92490	13637	19450	Protein of unknown function
AGROCRI.3P.000560.1	3P.scaffold-92490	23573	24764	Protein of unknown function
AGROCRI.3P.000561.1	3P.scaffold-4375	22102	30339	DNA damage-binding protein 1
AGROCRI.3P.000562.1	3P.scaffold-70669	5130	9053	Protein of unknown function
AGROCRI.3P.000563.1	3P.scaffold-70669	9214	13411	Protein of unknown function
AGROCRI.3P.000564.1	3P.scaffold-723	3233	12836	Protein of unknown function
AGROCRI.3P.000565.1	3P.scaffold-723	23834	24535	Protein of unknown function
AGROCRI.3P.000566.1	3P.scaffold-723	31705	40649	G-type lectin S-receptor-like serine/threonine-protein kinase SD1-1
AGROCRI.3P.000567.1	3P.scaffold-24927	2248	3677	Salt stress root protein RS1
AGROCRI.3P.000568.1	3P.scaffold-24927	4691	7739	Protein of unknown function
AGROCRI.3P.000569.1	3P.scaffold-74353	1033	2759	Protein of unknown function
AGROCRI.3P.000570.1	3P.scaffold-74353	5324	7278	Protein of unknown function
AGROCRI.3P.000571.1	3P.scaffold-74353	8756	12732	Protein of unknown function
AGROCRI.3P.000572.1	3P.scaffold-74353	18708	20383	Protein of unknown function
AGROCRI.3P.000573.1	3P.scaffold-12310	772	4939	Protein of unknown function
AGROCRI.3P.000574.1	3P.scaffold-12310	8954	11096	Protein of unknown function
AGROCRI.3P.000575.1	3P.scaffold-18258	2747	4084	Protein of unknown function
AGROCRI.3P.000576.1	3P.scaffold-18258	6721	11188	Protein of unknown function
AGROCRI.3P.000577.1	3P.scaffold-18258	13421	13717	Protein of unknown function
AGROCRI.3P.000578.1	3P.scaffold-18258	13974	16389	Protein of unknown function
AGROCRI.3P.000579.1	3P.scaffold-42571	7471	11877	Cullin-1
AGROCRI.3P.000580.1	3P.scaffold-8811	12619	15136	Protein of unknown function
AGROCRI.3P.000581.1	3P.scaffold-8811	16580	20059	Protein of unknown function
AGROCRI.3P.000582.1	3P.scaffold-21767	1734	11024	Protein of unknown function
AGROCRI.3P.000583.1	3P.scaffold-4220	670	10947	Protein of unknown function
AGROCRI.3P.000584.1	3P.scaffold-5005	2884	7696	ATP-citrate synthase beta chain protein 1
AGROCRI.3P.000585.1	3P.scaffold-5005	12044	12505	Protein of unknown function
AGROCRI.3P.000586.1	3P.scaffold-5352	109	11190	Sodium/hydrogen exchanger 7
AGROCRI.3P.000587.1	3P.scaffold-36411	7648	13952	Protein of unknown function
AGROCRI.3P.000588.1	3P.scaffold-36411	14310	17405	Protein of unknown function
AGROCRI.3P.000589.1	3P.scaffold-5918	1142	10955	Protein of unknown function
AGROCRI.3P.000590.1	3P.scaffold-5918	12728	13850	Protein of unknown function
AGROCRI.3P.000591.1	3P.scaffold-5918	14550	15324	Protein of unknown function
AGROCRI.3P.000592.1	3P.scaffold-4227	1256	9035	Protein of unknown function
AGROCRI.3P.000593.1	3P.scaffold-4443	5161	11011	Protein of unknown function
AGROCRI.3P.000594.1	3P.scaffold-5119	1	1461	Protein of unknown function
AGROCRI.3P.000595.1	3P.scaffold-5119	8317	12721	Protein of unknown function
AGROCRI.3P.000596.1	3P.scaffold-200213	7820	15774	DExH-box ATP-dependent RNA helicase DExH3
AGROCRI.3P.000597.1	3P.scaffold-201904	3900	7729	Protein of unknown function
AGROCRI.3P.000598.1	3P.scaffold-201904	8027	10324	Protein of unknown function
AGROCRI.3P.000599.1	3P.scaffold-201904	10757	11386	Protein of unknown function
AGROCRI.3P.000600.1	3P.scaffold-201315	3068	3799	Protein of unknown function
AGROCRI.3P.000601.1	3P.scaffold-201315	9354	10442	Protein of unknown function
AGROCRI.3P.000602.1	3P.scaffold-201315	14639	14881	Protein of unknown function
AGROCRI.3P.000603.1	3P.scaffold-201315	20523	24877	Protein of unknown function
AGROCRI.3P.000604.1	3P.scaffold-4205	3878	11119	Kinesin-like protein KIN-14A
AGROCRI.3P.000605.1	3P.scaffold-4187	189	788	Protein of unknown function
AGROCRI.3P.000606.1	3P.scaffold-4187	798	1256	Protein of unknown function
AGROCRI.3P.000607.1	3P.scaffold-4187	1834	6839	Amino-acid permease BAT1 homolog
AGROCRI.3P.000608.1	3P.scaffold-4187	7621	10497	Amino-acid permease BAT1 homolog
AGROCRI.3P.000609.1	3P.scaffold-4242	5508	11193	Protein of unknown function
AGROCRI.3P.000610.1	3P.scaffold-4242	12645	13232	Probable potassium transporter 2
AGROCRI.3P.000611.1	3P.scaffold-199523	2190	11374	Protein of unknown function
AGROCRI.3P.000612.1	3P.scaffold-5599	3190	9490	Putative clathrin assembly protein At2g01600
AGROCRI.3P.000613.1	3P.scaffold-5599	10143	11867	Protein of unknown function
AGROCRI.3P.000614.1	3P.scaffold-23631	3264	12906	Protein of unknown function
AGROCRI.3P.000615.1	3P.scaffold-36765	1570	5034	Protein of unknown function
AGROCRI.3P.000616.1	3P.scaffold-36765	7000	10671	Protein of unknown function
AGROCRI.3P.000617.1	3P.scaffold-17386	1412	4281	Protein of unknown function
AGROCRI.3P.000618.1	3P.scaffold-17386	4530	8112	Protein of unknown function
AGROCRI.3P.000619.1	3P.scaffold-17386	19622	22400	Protein of unknown function
AGROCRI.3P.000620.1	3P.scaffold-45117	4217	7082	Protein of unknown function
AGROCRI.3P.000621.1	3P.scaffold-45117	8018	14410	Protein of unknown function
AGROCRI.3P.000622.1	3P.scaffold-200245	10655	13203	Protein NDL1
AGROCRI.3P.000623.1	3P.scaffold-200245	14392	16685	Protein of unknown function
AGROCRI.3P.000624.1	3P.scaffold-6974	422	3610	1-deoxy-D-xylulose 5-phosphate reductoisomerase
AGROCRI.3P.000625.1	3P.scaffold-6974	4528	6781	RING-box protein 1
AGROCRI.3P.000626.1	3P.scaffold-30142	411	935	Protein of unknown function
AGROCRI.3P.000627.1	3P.scaffold-30142	4140	5477	Protein of unknown function
AGROCRI.3P.000628.1	3P.scaffold-30142	5908	13296	Protein of unknown function
AGROCRI.3P.000629.1	3P.scaffold-5248	1024	7278	Beta-galactosidase 3
AGROCRI.3P.000630.1	3P.scaffold-25271	438	1040	Protein of unknown function
AGROCRI.3P.000631.1	3P.scaffold-25271	2322	6762	Protein of unknown function
AGROCRI.3P.000632.1	3P.scaffold-25271	7558	7951	Protein of unknown function
AGROCRI.3P.000633.1	3P.scaffold-6932	3792	4524	Protein of unknown function
AGROCRI.3P.000634.1	3P.scaffold-6932	5306	5632	Protein of unknown function
AGROCRI.3P.000635.1	3P.scaffold-6932	5861	7356	Protein of unknown function
AGROCRI.3P.000636.1	3P.scaffold-6932	8842	11389	Protein of unknown function
AGROCRI.3P.000637.1	3P.scaffold-4535	315	15677	Regulator of telomere elongation helicase 1 homolog
AGROCRI.3P.000638.1	3P.scaffold-34851	1417	6190	Protein of unknown function
AGROCRI.3P.000639.1	3P.scaffold-34851	7446	11658	Protein of unknown function
AGROCRI.3P.000640.1	3P.scaffold-198008	536	3496	Protein of unknown function
AGROCRI.3P.000641.1	3P.scaffold-198008	5134	8265	CBL-interacting protein kinase 23
AGROCRI.3P.000642.1	3P.scaffold-200969	27873	30500	Glutathione S-transferase 1
AGROCRI.3P.000643.1	3P.scaffold-200969	32475	43592	LRR receptor kinase SERK2
AGROCRI.3P.000644.1	3P.scaffold-4724	1531	7636	ATP-dependent zinc metalloprotease FTSH 9
AGROCRI.3P.000645.1	3P.scaffold-28985	539	1000	Protein of unknown function
AGROCRI.3P.000646.1	3P.scaffold-28985	5051	8621	Protein of unknown function
AGROCRI.3P.000647.1	3P.scaffold-28985	10409	10972	Protein of unknown function
AGROCRI.3P.000648.1	3P.scaffold-28985	11593	12607	Protein of unknown function
AGROCRI.3P.000649.1	3P.scaffold-8193	501	14984	Protein of unknown function
AGROCRI.3P.000650.1	3P.scaffold-8193	21843	23246	Protein of unknown function
AGROCRI.3P.000651.1	3P.scaffold-8193	24355	25173	Protein of unknown function
AGROCRI.3P.000652.1	3P.scaffold-10641	1023	8138	Protein of unknown function
AGROCRI.3P.000653.1	3P.scaffold-10641	9644	10794	Protein of unknown function
AGROCRI.3P.000654.1	3P.scaffold-138059	167	4354	Protein of unknown function
AGROCRI.3P.000655.1	3P.scaffold-138059	5269	6240	Protein of unknown function
AGROCRI.3P.000656.1	3P.scaffold-4267	7044	7776	Protein of unknown function
AGROCRI.3P.000657.1	3P.scaffold-4267	8393	12879	Protein of unknown function
AGROCRI.3P.000658.1	3P.scaffold-4267	14335	15769	Uncharacterized protein At2g34160
AGROCRI.3P.000659.1	3P.scaffold-8751	402	8629	Protein of unknown function
AGROCRI.3P.000660.1	3P.scaffold-8751	9503	10138	Protein of unknown function
AGROCRI.3P.000661.1	3P.scaffold-438	3506	5857	Rust resistance kinase Lr10
AGROCRI.3P.000662.1	3P.scaffold-438	6666	10420	Protein of unknown function
AGROCRI.3P.000663.1	3P.scaffold-438	13042	14436	Protein of unknown function
AGROCRI.3P.000664.1	3P.scaffold-438	19380	21585	Protein of unknown function
AGROCRI.3P.000665.1	3P.scaffold-4147	9012	11858	Protein of unknown function
AGROCRI.3P.000666.1	3P.scaffold-4147	13260	18955	Protein of unknown function
AGROCRI.3P.000667.1	3P.scaffold-4147	22036	22317	Protein of unknown function
AGROCRI.3P.000668.1	3P.scaffold-202116	1965	2297	Protein of unknown function
AGROCRI.3P.000669.1	3P.scaffold-202116	2339	3594	Protein of unknown function
AGROCRI.3P.000670.1	3P.scaffold-202116	14915	16622	Protein of unknown function
AGROCRI.3P.000671.1	3P.scaffold-202116	24084	27415	Protein of unknown function
AGROCRI.3P.000672.1	3P.scaffold-4156	1688	2669	Protein of unknown function
AGROCRI.3P.000673.1	3P.scaffold-4156	2910	8698	Protein of unknown function
AGROCRI.3P.000674.1	3P.scaffold-15359	4891	13266	Protein of unknown function
AGROCRI.3P.000675.1	3P.scaffold-202254	5897	9706	Protein of unknown function
AGROCRI.3P.000676.1	3P.scaffold-202254	9967	11165	Protein of unknown function
AGROCRI.3P.000677.1	3P.scaffold-10047	1068	6964	Protein of unknown function
AGROCRI.3P.000678.1	3P.scaffold-10047	8220	11149	Protein of unknown function
AGROCRI.3P.000679.1	3P.scaffold-202264	1003	4461	E3 ubiquitin-protein ligase RGLG2
AGROCRI.3P.000680.1	3P.scaffold-202264	5503	7391	Protein of unknown function
AGROCRI.3P.000681.1	3P.scaffold-4402	1673	4278	Glycogen synthase kinase-3 homolog MsK-3
AGROCRI.3P.000682.1	3P.scaffold-4402	5281	8925	Protein of unknown function
AGROCRI.3P.000683.1	3P.scaffold-201688	2113	3713	Protein of unknown function
AGROCRI.3P.000684.1	3P.scaffold-201688	9269	16994	Protein of unknown function
AGROCRI.3P.000685.1	3P.scaffold-4134	22	354	Protein of unknown function
AGROCRI.3P.000686.1	3P.scaffold-4134	430	2893	Peroxidase 36
AGROCRI.3P.000687.1	3P.scaffold-4134	8222	9674	Peroxidase 72
AGROCRI.3P.000688.1	3P.scaffold-4134	11715	13529	Protein of unknown function
AGROCRI.3P.000689.1	3P.scaffold-4134	13884	14191	Protein of unknown function
AGROCRI.3P.000690.1	3P.scaffold-4113	1756	5499	Protein of unknown function
AGROCRI.3P.000691.1	3P.scaffold-4113	8769	13753	Protein of unknown function
AGROCRI.3P.000692.1	3P.scaffold-49282	1718	4929	Protein of unknown function
AGROCRI.3P.000693.1	3P.scaffold-49282	5758	7885	Protein of unknown function
AGROCRI.3P.000694.1	3P.scaffold-202187	7495	12943	Alpha-glucan phosphorylase
AGROCRI.3P.000695.1	3P.scaffold-202187	13817	14065	Protein of unknown function
AGROCRI.3P.000696.1	3P.scaffold-13236	42	5213	Protein of unknown function
AGROCRI.3P.000697.1	3P.scaffold-13236	6408	8722	Protein of unknown function
AGROCRI.3P.000698.1	3P.scaffold-46761	2594	3370	Germin-like protein 1-4
AGROCRI.3P.000699.1	3P.scaffold-46761	9329	11819	Protein of unknown function
AGROCRI.3P.000700.1	3P.scaffold-46761	12699	15485	Protein of unknown function
AGROCRI.3P.000701.1	3P.scaffold-46761	12777	13007	Protein of unknown function
AGROCRI.3P.000702.1	3P.scaffold-30989	1124	2669	Protein of unknown function
AGROCRI.3P.000703.1	3P.scaffold-30989	3570	6827	Protein of unknown function
AGROCRI.3P.000704.1	3P.scaffold-30989	11283	11603	Protein of unknown function
AGROCRI.3P.000705.1	3P.scaffold-30989	12007	12322	Protein of unknown function
AGROCRI.3P.000706.1	3P.scaffold-30518	532	1898	Protein of unknown function
AGROCRI.3P.000707.1	3P.scaffold-30518	4226	8063	Protein of unknown function
AGROCRI.3P.000708.1	3P.scaffold-30518	9348	10061	Protein of unknown function
AGROCRI.3P.000709.1	3P.scaffold-6054	401	4900	Protein of unknown function
AGROCRI.3P.000710.1	3P.scaffold-100124	1260	4746	Protein of unknown function
AGROCRI.3P.000711.1	3P.scaffold-100124	8757	9107	Protein of unknown function
AGROCRI.3P.000712.1	3P.scaffold-198611	1179	1544	Protein of unknown function
AGROCRI.3P.000713.1	3P.scaffold-198611	1683	2297	Protein of unknown function
AGROCRI.3P.000714.1	3P.scaffold-198611	3808	7655	Lipoyl synthase
AGROCRI.3P.000715.1	3P.scaffold-198611	8846	10870	Protein of unknown function
AGROCRI.3P.000716.1	3P.scaffold-198611	13509	15518	Protein of unknown function
AGROCRI.3P.000717.1	3P.scaffold-5937	215	2981	DEAD-box ATP-dependent RNA helicase 20
AGROCRI.3P.000718.1	3P.scaffold-5937	5665	10164	Cytochrome P450 90D2
AGROCRI.3P.000719.1	3P.scaffold-4960	1268	4711	Protein of unknown function
AGROCRI.3P.000720.1	3P.scaffold-4960	7450	8580	Protein of unknown function
AGROCRI.3P.000721.1	3P.scaffold-4588	135	7876	Protein of unknown function
AGROCRI.3P.000722.1	3P.scaffold-61800	806	3520	Protein of unknown function
AGROCRI.3P.000723.1	3P.scaffold-61800	6983	7267	Protein of unknown function
AGROCRI.3P.000724.1	3P.scaffold-61800	9115	9489	Protein of unknown function
AGROCRI.3P.000725.1	3P.scaffold-61800	10259	12810	Protein of unknown function
AGROCRI.3P.000726.1	3P.scaffold-10815	2968	8542	Protein of unknown function
AGROCRI.3P.000727.1	3P.scaffold-10815	9466	10968	Protein of unknown function
AGROCRI.3P.000728.1	3P.scaffold-4226	3764	5927	Protein of unknown function
AGROCRI.3P.000729.1	3P.scaffold-4226	7612	8101	Protein of unknown function
AGROCRI.3P.000730.1	3P.scaffold-4226	9286	12361	Rop guanine nucleotide exchange factor 7
AGROCRI.3P.000731.1	3P.scaffold-38838	7610	14461	Protein of unknown function
AGROCRI.3P.000732.1	3P.scaffold-197457	3777	5465	Protein of unknown function
AGROCRI.3P.000733.1	3P.scaffold-197457	7818	13387	Hexokinase-6
AGROCRI.3P.000734.1	3P.scaffold-197457	14083	15856	Protein of unknown function
AGROCRI.3P.000735.1	3P.scaffold-787	517	11038	Protein argonaute 1A
AGROCRI.3P.000736.1	3P.scaffold-787	7868	8167	Protein of unknown function
AGROCRI.3P.000737.1	3P.scaffold-6240	2349	6231	Protein of unknown function
AGROCRI.3P.000738.1	3P.scaffold-4421	750	7991	Probable histone acetyltransferase HAC-like 3
AGROCRI.3P.000739.1	3P.scaffold-4878	3260	13145	Dehydration-responsive element-binding protein 2A
AGROCRI.3P.000740.1	3P.scaffold-4878	14101	16013	Protein of unknown function
AGROCRI.3P.000741.1	3P.scaffold-135882	18850	19257	Protein of unknown function
AGROCRI.3P.000742.1	3P.scaffold-135882	21383	21631	Protein of unknown function
AGROCRI.3P.000743.1	3P.scaffold-135882	23050	31210	Beta-adaptin-like protein A
AGROCRI.3P.000744.1	3P.scaffold-4378	421	10775	Protein of unknown function
AGROCRI.3P.000745.1	3P.scaffold-4208	8367	12234	Proteasome subunit alpha type-2
AGROCRI.3P.000746.1	3P.scaffold-4208	15427	17931	Protein of unknown function
AGROCRI.3P.000747.1	3P.scaffold-9425	171	7361	Probable protein transport Sec1b
AGROCRI.3P.000748.1	3P.scaffold-9425	6960	7562	Protein of unknown function
AGROCRI.3P.000749.1	3P.scaffold-2134	1062	5602	Protein of unknown function
AGROCRI.3P.000750.1	3P.scaffold-2134	7087	9315	Protein of unknown function
AGROCRI.3P.000751.1	3P.scaffold-2134	10929	14911	Protein of unknown function
AGROCRI.3P.000752.1	3P.scaffold-98139	3338	9260	Protein of unknown function
AGROCRI.3P.000753.1	3P.scaffold-7095	745	4495	Deoxyhypusine synthase
AGROCRI.3P.000754.1	3P.scaffold-7095	6305	9759	Deoxyhypusine synthase
AGROCRI.3P.000755.1	3P.scaffold-18849	696	1004	Protein of unknown function
AGROCRI.3P.000756.1	3P.scaffold-18849	2341	5638	Protein of unknown function
AGROCRI.3P.000757.1	3P.scaffold-18849	6115	6985	indole-2-monooxygenase
AGROCRI.3P.000758.1	3P.scaffold-18849	7382	7783	Protein of unknown function
AGROCRI.3P.000759.1	3P.scaffold-18849	10371	10634	Protein of unknown function
AGROCRI.3P.000760.1	3P.scaffold-201953	6052	6594	Protein of unknown function
AGROCRI.3P.000761.1	3P.scaffold-201953	7677	8264	Protein of unknown function
AGROCRI.3P.000762.1	3P.scaffold-201953	9017	12178	Probable acetyl-CoA acetyltransferase
AGROCRI.3P.000763.1	3P.scaffold-1465	1426	6126	Protein of unknown function
AGROCRI.3P.000764.1	3P.scaffold-1465	13222	14304	Protein of unknown function
AGROCRI.3P.000765.1	3P.scaffold-1465	16466	18776	Selenium-binding protein 1
AGROCRI.3P.000766.1	3P.scaffold-4275	3696	10519	Protein of unknown function
AGROCRI.3P.000767.1	3P.scaffold-4275	11438	11902	Protein of unknown function
AGROCRI.3P.000768.1	3P.scaffold-200702	11081	11564	Protein of unknown function
AGROCRI.3P.000769.1	3P.scaffold-200702	12022	20372	Protein of unknown function
AGROCRI.3P.000770.1	3P.scaffold-8840	622	2411	Protein of unknown function
AGROCRI.3P.000771.1	3P.scaffold-8840	4215	9216	Protein of unknown function
AGROCRI.3P.000772.1	3P.scaffold-17508	827	8100	Protein of unknown function
AGROCRI.3P.000773.1	3P.scaffold-17508	8707	11235	Protein of unknown function
AGROCRI.3P.000774.1	3P.scaffold-4912	1783	7333	tRNA uridine 5-carboxymethylaminomethyl modification enzyme MnmG
AGROCRI.3P.000775.1	3P.scaffold-4912	8198	9593	Protein of unknown function
AGROCRI.3P.000776.1	3P.scaffold-5192	416	5785	FACT complex subunit SSRP1-A
AGROCRI.3P.000777.1	3P.scaffold-15143	1138	3109	Protein of unknown function
AGROCRI.3P.000778.1	3P.scaffold-15143	4382	12759	Protein of unknown function
AGROCRI.3P.000779.1	3P.scaffold-22117	374	1761	Protein of unknown function
AGROCRI.3P.000780.1	3P.scaffold-22117	2699	9444	Protein of unknown function
AGROCRI.3P.000781.1	3P.scaffold-199814	1030	3675	Protein of unknown function
AGROCRI.3P.000782.1	3P.scaffold-199814	5870	10258	Protein of unknown function
AGROCRI.3P.000783.1	3P.scaffold-10277	8057	12006	Protein of unknown function
AGROCRI.3P.000784.1	3P.scaffold-10277	12643	12939	Protein of unknown function
AGROCRI.3P.000785.1	3P.scaffold-10277	13182	16252	Protein of unknown function
AGROCRI.3P.000786.1	3P.scaffold-4648	1529	2547	Protein of unknown function
AGROCRI.3P.000787.1	3P.scaffold-4648	3800	10146	Protein of unknown function
AGROCRI.3P.000788.1	3P.scaffold-166082	15313	21286	Glucosidase 2 subunit beta
AGROCRI.3P.000789.1	3P.scaffold-74136	3130	4374	Protein of unknown function
AGROCRI.3P.000790.1	3P.scaffold-74136	4766	6973	Protein of unknown function
AGROCRI.3P.000791.1	3P.scaffold-74136	8310	9782	Protein of unknown function
AGROCRI.3P.000792.1	3P.scaffold-74136	20408	21988	Protein of unknown function
AGROCRI.3P.000793.1	3P.scaffold-199199	174	2300	Protein of unknown function
AGROCRI.3P.000794.1	3P.scaffold-199199	3395	5791	Protein of unknown function
AGROCRI.3P.000795.1	3P.scaffold-4089	966	1601	Protein of unknown function
AGROCRI.3P.000796.1	3P.scaffold-4089	2096	2658	Protein of unknown function
AGROCRI.3P.000797.1	3P.scaffold-4089	4769	6815	Protein of unknown function
AGROCRI.3P.000798.1	3P.scaffold-4089	8919	10098	Protein of unknown function
AGROCRI.3P.000799.1	3P.scaffold-2543	862	2263	Protein of unknown function
AGROCRI.3P.000800.1	3P.scaffold-2543	9884	11934	Protein of unknown function
AGROCRI.3P.000801.1	3P.scaffold-2543	17179	21700	Protein of unknown function
AGROCRI.3P.000802.1	3P.scaffold-28	32101	38629	ABC transporter G family member 38
AGROCRI.3P.000803.1	3P.scaffold-201743	12301	18477	Protein of unknown function
AGROCRI.3P.000804.1	3P.scaffold-201743	22363	23574	Protein of unknown function
AGROCRI.3P.000805.1	3P.scaffold-14775	3202	6248	Protein of unknown function
AGROCRI.3P.000806.1	3P.scaffold-14775	7582	12113	Protein of unknown function
AGROCRI.3P.000807.1	3P.scaffold-14775	13294	13692	Protein of unknown function
AGROCRI.3P.000808.1	3P.scaffold-6445	76	3747	Protein of unknown function
AGROCRI.3P.000809.1	3P.scaffold-6445	4515	8737	Protein of unknown function
AGROCRI.3P.000810.1	3P.scaffold-202094	2116	2703	Protein of unknown function
AGROCRI.3P.000811.1	3P.scaffold-202094	13189	18949	Protein of unknown function
AGROCRI.3P.000812.1	3P.scaffold-202094	20456	21864	Protein of unknown function
AGROCRI.3P.000813.1	3P.scaffold-202094	22035	22751	Protein of unknown function
AGROCRI.3P.000814.1	3P.scaffold-5090	2	2869	Kinesin-like protein KIN-8A
AGROCRI.3P.000815.1	3P.scaffold-5090	3375	6484	Protein of unknown function
AGROCRI.3P.000816.1	3P.scaffold-4298	123	3573	Protein of unknown function
AGROCRI.3P.000817.1	3P.scaffold-4298	11384	14802	Protein of unknown function
AGROCRI.3P.000818.1	3P.scaffold-1210	2426	6424	Protein of unknown function
AGROCRI.3P.000819.1	3P.scaffold-1210	7117	11700	Protein of unknown function
AGROCRI.3P.000820.1	3P.scaffold-5703	6572	9639	Probable magnesium transporter NIPA4
AGROCRI.3P.000821.1	3P.scaffold-5703	10224	10892	Protein of unknown function
AGROCRI.3P.000822.1	3P.scaffold-5703	11175	12066	NAD(P)H-quinone oxidoreductase subunit N
AGROCRI.3P.000823.1	3P.scaffold-2232	1027	1203	Protein of unknown function
AGROCRI.3P.000824.1	3P.scaffold-2232	1399	2580	Protein of unknown function
AGROCRI.3P.000825.1	3P.scaffold-2232	4149	9200	Protein of unknown function
AGROCRI.3P.000826.1	3P.scaffold-200836	5840	10408	Protein argonaute 1D
AGROCRI.3P.000827.1	3P.scaffold-17986	1032	2376	Protein of unknown function
AGROCRI.3P.000828.1	3P.scaffold-17986	3412	7418	Protein of unknown function
AGROCRI.3P.000829.1	3P.scaffold-95	1107	12244	Protein of unknown function
AGROCRI.3P.000830.1	3P.scaffold-6491	1804	6239	Protein of unknown function
AGROCRI.3P.000831.1	3P.scaffold-6491	9656	14299	Protein of unknown function
AGROCRI.3P.000832.1	3P.scaffold-201672	3	1121	Protein of unknown function
AGROCRI.3P.000833.1	3P.scaffold-201672	1157	2934	Protein of unknown function
AGROCRI.3P.000834.1	3P.scaffold-201672	4248	5394	Protein of unknown function
AGROCRI.3P.000835.1	3P.scaffold-201672	6037	6999	Protein of unknown function
AGROCRI.3P.000836.1	3P.scaffold-201376	175	5955	Protein of unknown function
AGROCRI.3P.000837.1	3P.scaffold-201376	8324	10322	Protein of unknown function
AGROCRI.3P.000838.1	3P.scaffold-201556	1932	2234	Protein of unknown function
AGROCRI.3P.000839.1	3P.scaffold-201556	4426	11341	Lycopene epsilon cyclase
AGROCRI.3P.000840.1	3P.scaffold-200721	2273	9503	Protein of unknown function
AGROCRI.3P.000841.1	3P.scaffold-200721	11146	11794	Protein of unknown function
AGROCRI.3P.000842.1	3P.scaffold-4712	8752	17125	Protein of unknown function
AGROCRI.3P.000843.1	3P.scaffold-33331	39	551	Protein of unknown function
AGROCRI.3P.000844.1	3P.scaffold-33331	1114	5243	Protein of unknown function
AGROCRI.3P.000845.1	3P.scaffold-201876	955	6263	Protein of unknown function
AGROCRI.3P.000846.1	3P.scaffold-201876	9978	12790	Protein of unknown function
AGROCRI.3P.000847.1	3P.scaffold-5011	7	12143	Protein of unknown function
AGROCRI.3P.000848.1	3P.scaffold-3773	9425	12898	Protein of unknown function
AGROCRI.3P.000849.1	3P.scaffold-3773	14322	14955	Protein of unknown function
AGROCRI.3P.000850.1	3P.scaffold-16448	15509	21385	Probable anion transporter 2
AGROCRI.3P.000851.1	3P.scaffold-16448	22516	26094	Protein of unknown function
AGROCRI.3P.000852.1	3P.scaffold-5492	6673	11332	Protein of unknown function
AGROCRI.3P.000853.1	3P.scaffold-73887	381	12906	Protein of unknown function
AGROCRI.3P.000854.1	3P.scaffold-201966	1258	6156	Protein of unknown function
AGROCRI.3P.000855.1	3P.scaffold-201966	8546	11358	Protein of unknown function
AGROCRI.3P.000856.1	3P.scaffold-4924	5041	5931	LOB domain-containing protein 41
AGROCRI.3P.000857.1	3P.scaffold-4924	8234	13351	Protein of unknown function
AGROCRI.3P.000858.1	3P.scaffold-168	653	1389	Protein of unknown function
AGROCRI.3P.000859.1	3P.scaffold-168	1950	4568	Protein of unknown function
AGROCRI.3P.000860.1	3P.scaffold-168	5737	6271	Protein of unknown function
AGROCRI.3P.000861.1	3P.scaffold-168	8184	9517	Protein of unknown function
AGROCRI.3P.000862.1	3P.scaffold-8825	529	2833	Protein of unknown function
AGROCRI.3P.000863.1	3P.scaffold-8825	3398	8114	Protein of unknown function
AGROCRI.3P.000864.1	3P.scaffold-199762	103	10650	Protein of unknown function
AGROCRI.3P.000865.1	3P.scaffold-4742	1065	7173	Probable pre-mRNA-splicing factor ATP-dependent RNA helicase DEAH9
AGROCRI.3P.000866.1	3P.scaffold-2043	6969	7736	Protein of unknown function
AGROCRI.3P.000867.1	3P.scaffold-2043	8525	14100	Protein of unknown function
AGROCRI.3P.000868.1	3P.scaffold-201328	2569	5981	3-phosphoinositide-dependent protein kinase 1
AGROCRI.3P.000869.1	3P.scaffold-201328	6635	8563	Protein of unknown function
AGROCRI.3P.000870.1	3P.scaffold-13425	240	6251	Protein of unknown function
AGROCRI.3P.000871.1	3P.scaffold-11850	5235	8505	Protein of unknown function
AGROCRI.3P.000872.1	3P.scaffold-11850	12556	13631	Protein of unknown function
AGROCRI.3P.000873.1	3P.scaffold-1414	6795	7277	Protein of unknown function
AGROCRI.3P.000874.1	3P.scaffold-1414	24916	36601	Protein of unknown function
AGROCRI.3P.000875.1	3P.scaffold-3816	1945	3676	Protein of unknown function
AGROCRI.3P.000876.1	3P.scaffold-3816	4932	9386	Protein of unknown function
AGROCRI.3P.000877.1	3P.scaffold-3816	12872	13660	Probable glutathione S-transferase
AGROCRI.3P.000878.1	3P.scaffold-13022	138	5707	Protein of unknown function
AGROCRI.3P.000879.1	3P.scaffold-48914	105	4298	Histone-lysine N-methyltransferase ATX4
AGROCRI.3P.000880.1	3P.scaffold-4359	5005	7544	Protein of unknown function
AGROCRI.3P.000881.1	3P.scaffold-4359	9076	14820	Protein of unknown function
AGROCRI.3P.000882.1	3P.scaffold-12414	2727	6265	Protein of unknown function
AGROCRI.3P.000883.1	3P.scaffold-12414	6786	9857	Protein of unknown function
AGROCRI.3P.000884.1	3P.scaffold-13497	1474	3445	Protein of unknown function
AGROCRI.3P.000885.1	3P.scaffold-13497	7620	11832	Protein of unknown function
AGROCRI.3P.000886.1	3P.scaffold-1032	3124	7506	Protein of unknown function
AGROCRI.3P.000887.1	3P.scaffold-1032	11432	13290	Protein of unknown function
AGROCRI.3P.000888.1	3P.scaffold-4273	5998	9229	Receptor-like cytoplasmic kinase 185
AGROCRI.3P.000889.1	3P.scaffold-4273	10254	13103	Protein of unknown function
AGROCRI.3P.000890.1	3P.scaffold-4747	3066	10681	Protein of unknown function
AGROCRI.3P.000891.1	3P.scaffold-371	6778	13466	Protein of unknown function
AGROCRI.3P.000892.1	3P.scaffold-54906	7858	15768	Aspartate--tRNA ligase
AGROCRI.3P.000893.1	3P.scaffold-200565	756	1777	Protein of unknown function
AGROCRI.3P.000894.1	3P.scaffold-200565	2925	4859	Protein of unknown function
AGROCRI.3P.000895.1	3P.scaffold-200565	10180	12064	D-glycerate 3-kinase
AGROCRI.3P.000896.1	3P.scaffold-4718	630	7212	Protein of unknown function
AGROCRI.3P.000897.1	3P.scaffold-4718	9690	10410	Protein of unknown function
AGROCRI.3P.000898.1	3P.scaffold-20309	4010	14358	Protein of unknown function
AGROCRI.3P.000899.1	3P.scaffold-4264	4912	7131	ABC transporter I family member 11
AGROCRI.3P.000900.1	3P.scaffold-4264	8466	9565	ABC transporter I family member 11
AGROCRI.3P.000901.1	3P.scaffold-9461	3287	8456	Protein of unknown function
AGROCRI.3P.000902.1	3P.scaffold-9461	8702	10890	Protein of unknown function
AGROCRI.3P.000903.1	3P.scaffold-6714	4129	9973	Protein of unknown function
AGROCRI.3P.000904.1	3P.scaffold-6117	2114	11603	Protein of unknown function
AGROCRI.3P.000905.1	3P.scaffold-37690	7316	7685	Protein of unknown function
AGROCRI.3P.000906.1	3P.scaffold-37690	10355	13888	Protein of unknown function
AGROCRI.3P.000907.1	3P.scaffold-4876	3413	8687	Protein of unknown function
AGROCRI.3P.000908.1	3P.scaffold-4660	2067	4392	Protein of unknown function
AGROCRI.3P.000909.1	3P.scaffold-4660	5406	8138	Protein of unknown function
AGROCRI.3P.000910.1	3P.scaffold-4309	2161	10413	Protein of unknown function
AGROCRI.3P.000911.1	3P.scaffold-4382	4189	8426	Protein of unknown function
AGROCRI.3P.000912.1	3P.scaffold-4382	9232	9725	Protein of unknown function
AGROCRI.3P.000913.1	3P.scaffold-4277	4152	7217	Protein of unknown function
AGROCRI.3P.000914.1	3P.scaffold-4277	9644	12552	Triose phosphate/phosphate translocator TPT
AGROCRI.3P.000915.1	3P.scaffold-199810	1716	4975	Protein of unknown function
AGROCRI.3P.000916.1	3P.scaffold-199810	4978	9469	Protein of unknown function
AGROCRI.3P.000917.1	3P.scaffold-66748	875	8392	Protein of unknown function
AGROCRI.3P.000918.1	3P.scaffold-24221	1571	2845	Protein of unknown function
AGROCRI.3P.000919.1	3P.scaffold-24221	3221	6961	Protein of unknown function
AGROCRI.3P.000920.1	3P.scaffold-9348	2130	9033	Protein of unknown function
AGROCRI.3P.000921.1	3P.scaffold-3908	6037	8478	Protein of unknown function
AGROCRI.3P.000922.1	3P.scaffold-3908	10184	11472	Serpin-Z1
AGROCRI.3P.000923.1	3P.scaffold-3908	17289	25909	Protein of unknown function
AGROCRI.3P.000924.1	3P.scaffold-118503	2832	3956	Protein of unknown function
AGROCRI.3P.000925.1	3P.scaffold-118503	10024	11277	Protein of unknown function
AGROCRI.3P.000926.1	3P.scaffold-118503	13005	19149	Protein of unknown function
AGROCRI.3P.000927.1	3P.scaffold-4704	2217	10528	Protein of unknown function
AGROCRI.3P.000928.1	3P.scaffold-6659	799	5923	DNA polymerase eta
AGROCRI.3P.000929.1	3P.scaffold-4131	8618	15515	Protein of unknown function
AGROCRI.3P.000930.1	3P.scaffold-6432	2591	8908	Protein of unknown function
AGROCRI.3P.000931.1	3P.scaffold-28029	31254	33458	Protein of unknown function
AGROCRI.3P.000932.1	3P.scaffold-28029	37511	42861	Protein PHOSPHATE STARVATION RESPONSE 2
AGROCRI.3P.000933.1	3P.scaffold-5219	1620	2518	Protein of unknown function
AGROCRI.3P.000934.1	3P.scaffold-5219	4571	8466	Vacuolar fusion protein MON1 homolog
AGROCRI.3P.000935.1	3P.scaffold-5536	2	815	Transcription factor HY5
AGROCRI.3P.000936.1	3P.scaffold-5536	2071	6148	ABC transporter C family member 3
AGROCRI.3P.000937.1	3P.scaffold-5607	349	3129	Protein of unknown function
AGROCRI.3P.000938.1	3P.scaffold-5607	3839	5117	Protein of unknown function
AGROCRI.3P.000939.1	3P.scaffold-8079	239	4291	Protein of unknown function
AGROCRI.3P.000940.1	3P.scaffold-8079	4929	12129	Protein of unknown function
AGROCRI.3P.000941.1	3P.scaffold-28544	1478	2356	Protein of unknown function
AGROCRI.3P.000942.1	3P.scaffold-28544	2946	8233	Protein of unknown function
AGROCRI.3P.000943.1	3P.scaffold-4177	729	3203	Laccase-7
AGROCRI.3P.000944.1	3P.scaffold-4177	6815	9065	Protein of unknown function
AGROCRI.3P.000945.1	3P.scaffold-4177	13661	15265	Protein of unknown function
AGROCRI.3P.000946.1	3P.scaffold-4515	10680	12572	Protein of unknown function
AGROCRI.3P.000947.1	3P.scaffold-4515	14571	19465	Protein of unknown function
AGROCRI.3P.000948.1	3P.scaffold-11170	196	2239	Protein of unknown function
AGROCRI.3P.000949.1	3P.scaffold-11170	4448	7963	Protein of unknown function
AGROCRI.3P.000950.1	3P.scaffold-77800	580	6855	Protein of unknown function
AGROCRI.3P.000951.1	3P.scaffold-9332	209	551	Protein of unknown function
AGROCRI.3P.000952.1	3P.scaffold-9332	1900	3799	Protein of unknown function
AGROCRI.3P.000953.1	3P.scaffold-9332	4990	6770	Protein of unknown function
AGROCRI.3P.000954.1	3P.scaffold-200215	2929	4025	Protein of unknown function
AGROCRI.3P.000955.1	3P.scaffold-200215	5127	7646	Protein of unknown function
AGROCRI.3P.000956.1	3P.scaffold-200215	9857	10514	Protein of unknown function
AGROCRI.3P.000957.1	3P.scaffold-200215	10868	13949	Protein of unknown function
AGROCRI.3P.000958.1	3P.scaffold-198030	2332	3237	Protein of unknown function
AGROCRI.3P.000959.1	3P.scaffold-198030	3888	8193	Protein of unknown function
AGROCRI.3P.000960.1	3P.scaffold-198030	9390	9950	Protein of unknown function
AGROCRI.3P.000961.1	3P.scaffold-6526	8843	12502	Auxin response factor 1
AGROCRI.3P.000962.1	3P.scaffold-4510	975	5639	Protein of unknown function
AGROCRI.3P.000963.1	3P.scaffold-4510	8996	9274	Protein of unknown function
AGROCRI.3P.000964.1	3P.scaffold-10255	781	2117	Geranylgeranyl transferase type-1 subunit beta
AGROCRI.3P.000965.1	3P.scaffold-10255	2856	4648	Very-long-chain (3R)-3-hydroxyacyl-CoA dehydratase PASTICCINO 2A
AGROCRI.3P.000966.1	3P.scaffold-4279	1099	6023	Protein of unknown function
AGROCRI.3P.000967.1	3P.scaffold-200391	322	4983	Protein of unknown function
AGROCRI.3P.000968.1	3P.scaffold-200391	7857	8222	Protein of unknown function
AGROCRI.3P.000969.1	3P.scaffold-50410	1108	5093	Protein of unknown function
AGROCRI.3P.000970.1	3P.scaffold-50410	4881	8678	Protein of unknown function
AGROCRI.3P.000971.1	3P.scaffold-765	771	4692	Protein of unknown function
AGROCRI.3P.000972.1	3P.scaffold-765	3936	4423	Protein of unknown function
AGROCRI.3P.000973.1	3P.scaffold-765	5547	6029	Protein of unknown function
AGROCRI.3P.000974.1	3P.scaffold-4689	2	292	Protein of unknown function
AGROCRI.3P.000975.1	3P.scaffold-4689	1790	6584	Serine/threonine-protein phosphatase 5
AGROCRI.3P.000976.1	3P.scaffold-14632	1372	4350	Protein of unknown function
AGROCRI.3P.000977.1	3P.scaffold-14632	10252	10865	Protein of unknown function
AGROCRI.3P.000978.1	3P.scaffold-201360	8479	18437	Protein of unknown function
AGROCRI.3P.000979.1	3P.scaffold-129167	8165	16826	Protein of unknown function
AGROCRI.3P.000980.1	3P.scaffold-129167	17979	19280	Protein of unknown function
AGROCRI.3P.000981.1	3P.scaffold-202029	15299	18536	Protein of unknown function
AGROCRI.3P.000982.1	3P.scaffold-202029	19278	22526	Protein of unknown function
AGROCRI.3P.000983.1	3P.scaffold-202029	23477	23903	Protein of unknown function
AGROCRI.3P.000984.1	3P.scaffold-200735	1050	5650	Protein of unknown function
AGROCRI.3P.000985.1	3P.scaffold-200735	6774	7082	Protein of unknown function
AGROCRI.3P.000986.1	3P.scaffold-4269	2989	6097	Protein of unknown function
AGROCRI.3P.000987.1	3P.scaffold-4269	6717	8911	Protein of unknown function
AGROCRI.3P.000988.1	3P.scaffold-4269	18023	20803	Protein of unknown function
AGROCRI.3P.000989.1	3P.scaffold-8286	573	3538	Protein of unknown function
AGROCRI.3P.000990.1	3P.scaffold-8286	4347	6454	Protein of unknown function
AGROCRI.3P.000991.1	3P.scaffold-5857	69	10189	Sister chromatid cohesion 1 protein 4
AGROCRI.3P.000992.1	3P.scaffold-4770	445	6879	Protein of unknown function
AGROCRI.3P.000993.1	3P.scaffold-7762	1413	7737	Protein of unknown function
AGROCRI.3P.000994.1	3P.scaffold-7762	4243	4788	Protein of unknown function
AGROCRI.3P.000995.1	3P.scaffold-18976	954	8553	GTP-binding protein YPTM2
AGROCRI.3P.000996.1	3P.scaffold-25906	577	1622	Protein of unknown function
AGROCRI.3P.000997.1	3P.scaffold-25906	2795	5429	Protein of unknown function
AGROCRI.3P.000998.1	3P.scaffold-73392	4202	4600	Protein of unknown function
AGROCRI.3P.000999.1	3P.scaffold-73392	5333	7099	Protein of unknown function
AGROCRI.3P.001000.1	3P.scaffold-73392	9037	10694	Probable protein S-acyltransferase 16
AGROCRI.3P.001001.1	3P.scaffold-201544	2213	5329	5-methyltetrahydropteroyltriglutamate--homocysteine methyltransferase 1
AGROCRI.3P.001002.1	3P.scaffold-201544	6377	9409	Uridine 5'-monophosphate synthase
AGROCRI.3P.001003.1	3P.scaffold-5321	525	5332	Protein of unknown function
AGROCRI.3P.001004.1	3P.scaffold-3330	122	5385	Protein of unknown function
AGROCRI.3P.001005.1	3P.scaffold-3330	5074	6061	Protein of unknown function
AGROCRI.3P.001006.1	3P.scaffold-3330	7366	7692	Protein of unknown function
AGROCRI.3P.001007.1	3P.scaffold-4569	4027	8843	Protein of unknown function
AGROCRI.3P.001008.1	3P.scaffold-4569	14545	15220	Protein of unknown function
AGROCRI.3P.001009.1	3P.scaffold-34512	1248	6113	Protein of unknown function
AGROCRI.3P.001010.1	3P.scaffold-13101	1138	2257	Protein of unknown function
AGROCRI.3P.001011.1	3P.scaffold-13101	2311	3129	Protein of unknown function
AGROCRI.3P.001012.1	3P.scaffold-13101	10144	12191	Protein of unknown function
AGROCRI.3P.001013.1	3P.scaffold-4337	2338	10049	Protein of unknown function
AGROCRI.3P.001014.1	3P.scaffold-19010	11468	12246	Protein of unknown function
AGROCRI.3P.001015.1	3P.scaffold-19010	16430	21274	Protein of unknown function
AGROCRI.3P.001016.1	3P.scaffold-4551	662	3655	Beta-galactosidase 2
AGROCRI.3P.001017.1	3P.scaffold-4551	5427	7927	Protein of unknown function
AGROCRI.3P.001018.1	3P.scaffold-34382	538	1991	Protein of unknown function
AGROCRI.3P.001019.1	3P.scaffold-34382	5593	10539	Protein of unknown function
AGROCRI.3P.001020.1	3P.scaffold-4579	917	2269	Protein of unknown function
AGROCRI.3P.001021.1	3P.scaffold-4579	2366	4996	Protein MLN51 homolog
AGROCRI.3P.001022.1	3P.scaffold-4579	6524	7123	Protein of unknown function
AGROCRI.3P.001023.1	3P.scaffold-106761	5233	6637	Protein of unknown function
AGROCRI.3P.001024.1	3P.scaffold-106761	9831	10508	Protein of unknown function
AGROCRI.3P.001025.1	3P.scaffold-106761	11865	13655	Protein of unknown function
AGROCRI.3P.001026.1	3P.scaffold-131116	1767	3026	Protein of unknown function
AGROCRI.3P.001027.1	3P.scaffold-131116	4459	6481	Protein of unknown function
AGROCRI.3P.001028.1	3P.scaffold-131116	7648	9257	Protein COFACTOR ASSEMBLY OF COMPLEX C SUBUNIT B CCB1
AGROCRI.3P.001029.1	3P.scaffold-43532	17322	19079	Protein of unknown function
AGROCRI.3P.001030.1	3P.scaffold-43532	19801	24706	Sodium/calcium exchanger NCL1
AGROCRI.3P.001031.1	3P.scaffold-6787	1356	12722	Protein of unknown function
AGROCRI.3P.001032.1	3P.scaffold-4334	1252	2156	Protein of unknown function
AGROCRI.3P.001033.1	3P.scaffold-4334	4488	5216	Protein of unknown function
AGROCRI.3P.001034.1	3P.scaffold-4334	5590	8584	Protein of unknown function
AGROCRI.3P.001035.1	3P.scaffold-5761	1189	1539	Protein of unknown function
AGROCRI.3P.001036.1	3P.scaffold-5761	3473	6297	Protein of unknown function
AGROCRI.3P.001037.1	3P.scaffold-54111	5150	10869	Protein of unknown function
AGROCRI.3P.001038.1	3P.scaffold-4486	1089	4333	Protein of unknown function
AGROCRI.3P.001039.1	3P.scaffold-3782	910	4294	Persulfide dioxygenase ETHE1 homolog
AGROCRI.3P.001040.1	3P.scaffold-3782	5326	7196	Protein of unknown function
AGROCRI.3P.001041.1	3P.scaffold-3782	8160	8903	Protein of unknown function
AGROCRI.3P.001042.1	3P.scaffold-22014	2	5721	Protein of unknown function
AGROCRI.3P.001043.1	3P.scaffold-8867	269	2608	Protein of unknown function
AGROCRI.3P.001044.1	3P.scaffold-8867	4402	6871	Reticulon-like protein B1
AGROCRI.3P.001045.1	3P.scaffold-290	1712	5872	Protein of unknown function
AGROCRI.3P.001046.1	3P.scaffold-290	8013	12495	Actin-interacting protein 1-2
AGROCRI.3P.001047.1	3P.scaffold-30283	1734	5276	Protein of unknown function
AGROCRI.3P.001048.1	3P.scaffold-30283	8234	9447	Protein of unknown function
AGROCRI.3P.001049.1	3P.scaffold-15990	1147	7541	Inositol hexakisphosphate and diphosphoinositol-pentakisphosphate kinase VIP1
AGROCRI.3P.001050.1	3P.scaffold-15990	9516	11946	Protein of unknown function
AGROCRI.3P.001051.1	3P.scaffold-20724	872	5033	Protein of unknown function
AGROCRI.3P.001052.1	3P.scaffold-20724	9488	10973	Protein of unknown function
AGROCRI.3P.001053.1	3P.scaffold-39462	5129	11528	Protein of unknown function
AGROCRI.3P.001054.1	3P.scaffold-5255	915	1412	Protein of unknown function
AGROCRI.3P.001055.1	3P.scaffold-5255	2838	3461	Protein of unknown function
AGROCRI.3P.001056.1	3P.scaffold-5255	4110	7623	Dol-P-Man:Man(5)GlcNAc(2)-PP-Dol alpha-1
AGROCRI.3P.001057.1	3P.scaffold-6889	924	3709	Protein of unknown function
AGROCRI.3P.001058.1	3P.scaffold-6889	5203	7695	Protein of unknown function
AGROCRI.3P.001059.1	3P.scaffold-5022	3122	8209	Protein of unknown function
AGROCRI.3P.001060.1	3P.scaffold-5400	1	1600	Protein of unknown function
AGROCRI.3P.001061.1	3P.scaffold-5400	2465	5584	Protein of unknown function
AGROCRI.3P.001062.1	3P.scaffold-159449	2	981	Protein of unknown function
AGROCRI.3P.001063.1	3P.scaffold-159449	2241	4815	Protein of unknown function
AGROCRI.3P.001064.1	3P.scaffold-159449	5127	6515	Signal recognition particle 54 kDa protein 2
AGROCRI.3P.001065.1	3P.scaffold-4405	3988	19336	Protein of unknown function
AGROCRI.3P.001066.1	3P.scaffold-506	3629	8301	Protein of unknown function
AGROCRI.3P.001067.1	3P.scaffold-5139	1149	6873	Protein of unknown function
AGROCRI.3P.001068.1	3P.scaffold-4420	1575	11502	Protein of unknown function
AGROCRI.3P.001069.1	3P.scaffold-6042	1066	8326	Protein of unknown function
AGROCRI.3P.001070.1	3P.scaffold-343	2035	3329	Protein of unknown function
AGROCRI.3P.001071.1	3P.scaffold-343	9505	11521	Probable aldo-keto reductase 1
AGROCRI.3P.001072.1	3P.scaffold-23350	1128	1764	Protein of unknown function
AGROCRI.3P.001073.1	3P.scaffold-23350	2260	5399	Protein of unknown function
AGROCRI.3P.001074.1	3P.scaffold-8545	2	1028	Protein of unknown function
AGROCRI.3P.001075.1	3P.scaffold-8545	1347	4358	Triosephosphate isomerase
AGROCRI.3P.001076.1	3P.scaffold-8269	68	2101	Protein of unknown function
AGROCRI.3P.001077.1	3P.scaffold-8269	4399	11024	Carboxyl-terminal-processing peptidase 1
AGROCRI.3P.001078.1	3P.scaffold-198910	550	2229	Anoctamin-like protein Os01g0706700
AGROCRI.3P.001079.1	3P.scaffold-198910	2905	3159	Protein of unknown function
AGROCRI.3P.001080.1	3P.scaffold-198910	3875	4998	60S ribosomal protein L28-1
AGROCRI.3P.001081.1	3P.scaffold-15944	839	2172	Protein of unknown function
AGROCRI.3P.001082.1	3P.scaffold-15944	3222	7786	Protein of unknown function
AGROCRI.3P.001083.1	3P.scaffold-4501	1740	2606	Protein of unknown function
AGROCRI.3P.001084.1	3P.scaffold-4501	12818	13102	Protein of unknown function
AGROCRI.3P.001085.1	3P.scaffold-4501	14291	17852	Protein of unknown function
AGROCRI.3P.001086.1	3P.scaffold-5639	597	8078	Proline--tRNA ligase
AGROCRI.3P.001087.1	3P.scaffold-15235	1871	8800	Protein of unknown function
AGROCRI.3P.001088.1	3P.scaffold-200194	130	1272	Protein of unknown function
AGROCRI.3P.001089.1	3P.scaffold-200194	2165	2488	Protein of unknown function
AGROCRI.3P.001090.1	3P.scaffold-200194	2923	4282	Protein of unknown function
AGROCRI.3P.001091.1	3P.scaffold-200194	5908	7065	Protein of unknown function
AGROCRI.3P.001092.1	3P.scaffold-200194	10863	11957	Protein of unknown function
AGROCRI.3P.001093.1	3P.scaffold-93136	978	4014	Protein of unknown function
AGROCRI.3P.001094.1	3P.scaffold-93136	9323	11830	Protein of unknown function
AGROCRI.3P.001095.1	3P.scaffold-93136	13456	16490	Protein of unknown function
AGROCRI.3P.001096.1	3P.scaffold-6978	97	5995	Protein of unknown function
AGROCRI.3P.001097.1	3P.scaffold-6509	692	3509	Tubulin beta chain
AGROCRI.3P.001098.1	3P.scaffold-6509	4885	7765	Protein of unknown function
AGROCRI.3P.001099.1	3P.scaffold-4977	466	534	Protein of unknown function
AGROCRI.3P.001100.1	3P.scaffold-4977	1019	4208	Protein of unknown function
AGROCRI.3P.001101.1	3P.scaffold-202273	25770	32044	Protein of unknown function
AGROCRI.3P.001102.1	3P.scaffold-94458	4477	10477	Protein of unknown function
AGROCRI.3P.001103.1	3P.scaffold-94458	12271	14220	Protein of unknown function
AGROCRI.3P.001104.1	3P.scaffold-4779	680	3171	Protein of unknown function
AGROCRI.3P.001105.1	3P.scaffold-4779	7158	9942	Peroxisomal acyl-coenzyme A oxidase 1
AGROCRI.3P.001106.1	3P.scaffold-201631	25405	27436	Protein of unknown function
AGROCRI.3P.001107.1	3P.scaffold-201631	27554	31374	Protein of unknown function
AGROCRI.3P.001108.1	3P.scaffold-201762	16021	20839	Protein of unknown function
AGROCRI.3P.001109.1	3P.scaffold-201762	21196	23544	Protein of unknown function
AGROCRI.3P.001110.1	3P.scaffold-40923	1497	5548	NADH-cytochrome b5 reductase-like protein
AGROCRI.3P.001111.1	3P.scaffold-142	1315	4018	Protein of unknown function
AGROCRI.3P.001112.1	3P.scaffold-142	7242	10563	Protein of unknown function
AGROCRI.3P.001113.1	3P.scaffold-8958	959	4370	Beta-glucosidase 5
AGROCRI.3P.001114.1	3P.scaffold-5158	2083	8208	Protein of unknown function
AGROCRI.3P.001115.1	3P.scaffold-44828	62	7452	Protein of unknown function
AGROCRI.3P.001116.1	3P.scaffold-50486	65	466	Protein of unknown function
AGROCRI.3P.001117.1	3P.scaffold-50486	1376	5610	Protein of unknown function
AGROCRI.3P.001118.1	3P.scaffold-59215	2275	3418	Protein of unknown function
AGROCRI.3P.001119.1	3P.scaffold-59215	7323	14377	Protein of unknown function
AGROCRI.3P.001120.1	3P.scaffold-6864	1659	4341	Rust resistance kinase Lr10
AGROCRI.3P.001121.1	3P.scaffold-6864	6896	9132	Protein of unknown function
AGROCRI.3P.001122.1	3P.scaffold-6864	13109	14269	Protein of unknown function
AGROCRI.3P.001123.1	3P.scaffold-6864	16376	17126	Protein of unknown function
AGROCRI.3P.001124.1	3P.scaffold-6832	434	5350	Alpha-glucan phosphorylase
AGROCRI.3P.001125.1	3P.scaffold-33721	79	1385	Protein DETOXIFICATION 40
AGROCRI.3P.001126.1	3P.scaffold-33721	2053	6083	Protein DETOXIFICATION 40
AGROCRI.3P.001127.1	3P.scaffold-15	9649	13928	Zinc finger CCCH domain-containing protein 12
AGROCRI.3P.001128.1	3P.scaffold-15	15312	15756	Protein of unknown function
AGROCRI.3P.001129.1	3P.scaffold-15	22499	24969	Protein of unknown function
AGROCRI.3P.001130.1	3P.scaffold-4573	4504	4986	Protein of unknown function
AGROCRI.3P.001131.1	3P.scaffold-4573	5724	9279	Homeobox-leucine zipper protein ROC9
AGROCRI.3P.001132.1	3P.scaffold-6314	9310	16496	Protein of unknown function
AGROCRI.3P.001133.1	3P.scaffold-28750	1	1044	Protein of unknown function
AGROCRI.3P.001134.1	3P.scaffold-28750	4467	9435	Protein of unknown function
AGROCRI.3P.001135.1	3P.scaffold-132140	12	9853	Protein of unknown function
AGROCRI.3P.001136.1	3P.scaffold-132140	10556	11766	Protein of unknown function
AGROCRI.3P.001137.1	3P.scaffold-92091	2	1270	Protein of unknown function
AGROCRI.3P.001138.1	3P.scaffold-92091	4750	8726	Protein of unknown function
AGROCRI.3P.001139.1	3P.scaffold-92091	11493	12113	Protein of unknown function
AGROCRI.3P.001140.1	3P.scaffold-19076	10354	12107	Protein of unknown function
AGROCRI.3P.001141.1	3P.scaffold-19076	13312	17074	Protein of unknown function
AGROCRI.3P.001142.1	3P.scaffold-201911	1	774	Protein of unknown function
AGROCRI.3P.001143.1	3P.scaffold-201911	9022	10931	Protein of unknown function
AGROCRI.3P.001144.1	3P.scaffold-201911	12504	13005	Protein BOLA2
AGROCRI.3P.001145.1	3P.scaffold-201911	14067	17490	Sm-like protein LSM3B
AGROCRI.3P.001146.1	3P.scaffold-4346	5230	8572	Protein of unknown function
AGROCRI.3P.001147.1	3P.scaffold-4346	14714	15139	Protein of unknown function
AGROCRI.3P.001148.1	3P.scaffold-160989	317	1348	Protein of unknown function
AGROCRI.3P.001149.1	3P.scaffold-160989	10239	11072	Protein of unknown function
AGROCRI.3P.001150.1	3P.scaffold-160989	14495	17296	6-phosphogluconate dehydrogenase
AGROCRI.3P.001151.1	3P.scaffold-13792	18093	21224	Protein of unknown function
AGROCRI.3P.001152.1	3P.scaffold-19299	2672	9497	Protein of unknown function
AGROCRI.3P.001153.1	3P.scaffold-6989	2234	5488	Serine/arginine-rich splicing factor SR30
AGROCRI.3P.001154.1	3P.scaffold-7154	531	4497	Boron transporter 4
AGROCRI.3P.001155.1	3P.scaffold-4591	3025	3279	Protein of unknown function
AGROCRI.3P.001156.1	3P.scaffold-4591	7567	10047	Protein of unknown function
AGROCRI.3P.001157.1	3P.scaffold-4649	590	5149	Exonuclease 1
AGROCRI.3P.001158.1	3P.scaffold-4649	10963	11969	Tyrosine N-monooxygenase
AGROCRI.3P.001159.1	3P.scaffold-199169	74	1088	Protein of unknown function
AGROCRI.3P.001160.1	3P.scaffold-199169	4799	6801	Hexokinase-8
AGROCRI.3P.001161.1	3P.scaffold-4633	549	6827	Protein of unknown function
AGROCRI.3P.001162.1	3P.scaffold-4633	10041	10505	Pleckstrin homology domain-containing protein 1
AGROCRI.3P.001163.1	3P.scaffold-81815	7008	7908	Protein of unknown function
AGROCRI.3P.001164.1	3P.scaffold-81815	10611	13815	Protein of unknown function
AGROCRI.3P.001165.1	3P.scaffold-81815	14458	16675	Protein of unknown function
AGROCRI.3P.001166.1	3P.scaffold-22	900	1843	Protein of unknown function
AGROCRI.3P.001167.1	3P.scaffold-22	12589	17295	Protein of unknown function
AGROCRI.3P.001168.1	3P.scaffold-80799	7008	7908	Protein of unknown function
AGROCRI.3P.001169.1	3P.scaffold-80799	10611	13815	Protein of unknown function
AGROCRI.3P.001170.1	3P.scaffold-80799	15109	17631	Protein of unknown function
AGROCRI.3P.001171.1	3P.scaffold-4128	10860	12134	Protein of unknown function
AGROCRI.3P.001172.1	3P.scaffold-4128	12797	15698	Protein of unknown function
AGROCRI.3P.001173.1	3P.scaffold-6206	5355	8852	Protein of unknown function
AGROCRI.3P.001174.1	3P.scaffold-6698	4578	8746	Protein of unknown function
AGROCRI.3P.001175.1	3P.scaffold-6698	9815	13393	Protein of unknown function
AGROCRI.3P.001176.1	3P.scaffold-4389	966	3838	Protein of unknown function
AGROCRI.3P.001177.1	3P.scaffold-4389	8316	11370	Transcription factor SCREAM2
AGROCRI.3P.001178.1	3P.scaffold-4800	3454	6956	Protein of unknown function
AGROCRI.3P.001179.1	3P.scaffold-4800	8079	9344	Protein of unknown function
AGROCRI.3P.001180.1	3P.scaffold-4800	13316	14611	Protein of unknown function
[truncated: 9,796 more rows]

## Sheet: 4P
Table S3: Overview of annotated genes in the draft assemblies of Agropyron cristatum.
[truncated: 1,471 more rows]

[truncated: 3 more sheets: 5P, 6P, 7P]
