# Supplementary material for: Draft Sequencing Crested Wheatgrass Chromosomes Identified Evolutionary Structural Changes and Genes and Facilitated the Development of SSR Markers
Source: Int J Mol Sci. 2022 Mar 16;23(6):3191. doi: 10.3390/ijms23063191 (PMC8948999; doi:10.3390/ijms23063191)
Supplement: Supplementary file 1 [file ijms-23-03191-s001.zip › TableS4.xlsx]

## Sheet: Chromosome specific markers
Table S4: Sequences of SSR primer pairs developed in our study. Part A: Sequences of chromo-some-specific and chromosome-arm-specific SSR markers for A. cristatum.
Marker name	Scaffold name	Primer name	Primer sequence (5' - 3')	Mapping on addition line	Specific to chromosome or chromosomal arm	Annealing temperature	Location in wheat	Location in wheat (note)
ocwgm001	1P_scaffold-4192_1	1Pb_4_F	5’-GCGGAGTCACCATATCCACC	1P, 1PS+1BL	1PS+1BL	57 °C	1AS, 1BS, 1DS
		1Pb_4_R	5’-GAGGGAACGGTCGTGACATT
ocwgm002	1P_scaffold-18078_1	1P_2_F	5’-AGGGGTGGGCTATACCTGAA	1P	1P	62 °C	1BS, 1DS
		1P_2_R	5’-TGAAGTACACGAATGTTTTTCTCA
ocwgm003	1P_scaffold-33337_1	1P_3_F	5’-CATAGCCCACAACGAGTCCA	1P	1P	62 °C	1AS, 1BS, 1DS	1BS - duplication
		1P_3_R	5’-ATCTTGGGTCGTCTCCTCGA
ocwgm004	1P_scaffold-2656_1	1P_9_F	5’-CGTTCAACGCGTATTTCCAA	1P	1P	62 °C	1AS, 1BL, 1DS
		1P_9_R	5’-TTGAGCGTGCAGTTCGGAAG
ocwgm005	1P_scaffold-17783_1	1Pb_5_F	5’-TCGTCGTCTTTCCTCTCTCT	1P	1P	55 °C	1AS, 1BS, 1DS
		1Pb_5_R	5’-TCATGCGCATATCTTTAACAGTTT
ocwgm006	1P_scaffold-2495_1	1Pb_6_F	5’-GTTAGCACTCCACCGTTCCA	1P	1P	57 °C	1AS, 1BS, 1DS
		1Pb_6_R	5’-ACACACCAGGAGATAACTAAACCC
ocwgm007	2P_scaffold-67649_1	2P_2_F	5’-TTGGGCCCGGGACTATATGT	2P, 2PS	2PS	62 °C	2AS, 2BL, 2DS
		2P_2_R	5’-AGTCCCGATTGGTGACTCCA
ocwgm008	2P_scaffold-5391_1	2P_7_F	5’-GCAGTTCATGGGATGGTGGA	2P, 2PS	2PS	62 °C	2AS, 2BS, 2DS
		2P_7_R	5’-GACCTTCGTATCTGGACGGAC
ocwgm009	2P_scaffold-14485_1	2P_8_F	5’-CAGGGTTATTGCGTGCATGG	2P, 2PS	2PS	62 °C	2AS, 2BS, 2DS
		2P_8_R	5’-GTTGGGGTGAGAGACTTGGG
ocwgm010	2P_scaffold-18772_1	2P_9_F	5’-AGTCTCTCGGAGGTGCTCAT	2P, 2PS	2PS	62 °C	2AS, 2BS, 2DS
		2P_9_R	5’-CCCCTGGCAGTGTACTGTTT
ocwgm011	2P_scaffold-7605_1	2P_11_F	5’-ACCCCAACTTGTTTCGGACT	2P, 2PS	2PS	62 °C	2AL, 2BL, 2DL
		2P_11_R	5’-TTTCCGGACGGAGGGAGTAT
ocwgm012	2P_scaffold-214751_1	2Pb_3_F	5’-CTCCTCCGCATCGTCTTTCT	2P, 2PS	2PS	57 °C	2AS, 2BS, 2DS
		2Pb_3_R	5’-GGCGTGTATGCTTTGACGTC
ocwgm013	2P_scaffold-3879_1	2P_1_F	5’-GAAGTGCACGTGTGGTTTCC	2P, 2PL	2PL	62 °C	2AL, 2BL, 2DS
		2P_1_R	5’-GAGGTGTGGGGTATGGGAGA
ocwgm014	2P_scaffold-127350_1	2P_14_F	5’-TCTATTGCCGATCAGTGGCC	2P, 2PL	2PL	62 °C	2AL, 2DL
		2P_14_R	5’-TGCCTTCATGGGTATAACAGCA
ocwgm015	2P_scaffold-9358_1	2P_15_F	5’-CAGATATAACAAATACACTCACGACCC	2P, 2PL	2PL	57 °C	2AL, 2BL, 2DL	2BL - duplication
		2P_15_R	5’-CGATAGTTCTGTCCCCGAGC
ocwgm016	2P_scaffold-12201_1	2P_17_F	5’-GAGCGGGTCCTTTGTGTGTA	2P, 2PL	2PL	62 °C	2AL, 2BL, 2DL
		2P_17_R	5’-CAGAAACTGGTTCCAGCCGA
ocwgm017	2P_scaffold-112478_1	2P_18_F	5’-GCGTGCGAAATCAACACAGT	2P, 2PL	2PL	62 °C	2DL
		2P_18_R	5’-TGGAAATCGACGAGTTGTCCA
ocwgm018	2P_scaffold-5383_1	2Pb_9_F	5’-GAGCAGCGGTGTTTTGTCG	2P, 2PL	2PL	62 °C	2AL, 2BL, 2DL
		2Pb_9_R	5’-CATATGCTCCCAGGGCCAAA
ocwgm019	2P_scaffold-319_1	2Pb_2_F	5’-GCCACTCATTAGGGTTCCCC	2P, 2PS, 2PL	2P	57 °C	2AL, 2BS, 2DS
		2Pb_2_R	5’-AAGCACGCGGTACATCAAGA
ocwgm020	3P_scaffold-111756_4	3P_4_F	5’-TCTGTGCCGTTCAAGCATCT	3P+3PS, 3PS	3PS	62 °C	3AS, 3BS, 3DS
		3P_4_R	5’-TTTGGCATGGGTTTGCATGG
ocwgm021	3P_scaffold-180855_2	3Pb_1_F	5’-CGTGGCTCTTTTGTGCTTCC	3P+3PS, 3PS	3PS	62 °C	3AS, 3BS, 3DS
		3Pb_1_R	5’-GGCGAGCACTGTCGATAAGA
ocwgm022	3P_scaffold-28567_1	3Pb_3_F	5’-TTCGGCTCGCTTCGATTCTT	3P+3PS, 3PS	3PS	62 °C	3AS, 3BS, 3DS
		3Pb_3_R	5’-TGAGGCGGTAATGTGTGCAT
ocwgm023	3P_scaffold-201994_1	3Pb_5_F	5’-GCACAACTTTCTGTAACCTTGGT	3P+3PS, 3PS	3PS	62 °C	3AL, 3BS, 3DS
		3Pb_5_R	5’-ATGGAGCACCTAGGGGACAT
ocwgm024	3P_scaffold-6216_1	3Pb_7_F	5’-TCGGCCGGGATATTTTGTCT	3P+3PS, 3PS	3PS	62 °C	3AS, 3BS, 3DS
		3Pb_7_R	5’-TGAATGGCAGGCACTAAACCT
ocwgm025	3P_scaffold-5719_1	3Pb_8_F	5’-AAAGTGACCATACGGGAGCC	3P+3PS, 3PS	3PS	55 °C	3AS, 3BS, 3DS
		3Pb_8_R	5’-AAGGATCAGGACATGGCAGC
ocwgm026	3P_scaffold-8849_1	3Pb_9_F	5’-CAAGATGTCTGGCAGTTGGC	3P+3PS, 3PS	3PS	62 °C	3AS, 3BS, 3DS
		3Pb_9_R	5’-CAGAGATTTTGGCCGCGATG
ocwgm027	3P_scaffold-80497_1	3Pc_1_F	5’-GGCTAGTTGCGATCGGAAGA	3P+3PS, 3PS	3PS	55 °C	3AS, 3AL, 3BL, 3DS
		3Pc_1_R	5’-AGTCTCTCGGAGGTGCTCAT
ocwgm028	3P_scaffold-14952_1	3Pc_5_F	5’-TCTCCCGTACGCAAAGCATT	3P+3PS, 3PS	3PS	62 °C	3AS, 3BS, 3DS
		3Pc_5_R	5’-GGTGAGAGGGGCTTTGACAT
ocwgm029	3P_scaffold-198386_1	3P_11_F	5’-GGGATTTGCTGATGTCGTCC	3P+3PS	3PL	55 °C	3AL, 3BL, 3DL
		3P_11_R	5’-AAAATCACGGGCCAACTTGC
ocwgm030	3P_scaffold-17234_1	3P_12_F	5’-CGGTGCTCCAAAATGTTACGT	3P+3PS	3PL	62 °C	3AL, 3BL, 3DL
		3P_12_R	5’-AACTCATGTGAGCTCCGGTG
ocwgm031	3P_scaffold-150962_1	3P_13_F	5’-TTTGTTCCAGTGGGACGGAG	3P+3PS	3PL	57 °C	3AL, 3BL, 3DL
		3P_13_R	5’-GAGCTGCCTCGGAGCATAG
ocwgm032	3P_scaffold-4131_2	3Pb_11_F	5’-TTGGCTAGGCTTTGGTCCAG	3P+3PS	3PL	62 °C	3BS, 3DL
		3Pb_11_R	5’-TGCTCCAACGTGGGCTAATT
ocwgm033	3P_scaffold-52822_1	3Pb_19_F	5’-CCCATACTCCTTCCATCCGC	3P+3PS	3PL	62 °C	3DL
		3Pb_19_R	5’-CCTACTCGCTGTAGCCATGG
ocwgm034	4P_scaffold-848_1	4P_12_F	5’-AGTACACACCAATGCCCACC	4P, 4PS	4PS	62 °C	4AS, 4BS, 4DL
		4P_12_R	5’-CAGCGCTCCTGTTACCAGTT
ocwgm035	4P_scaffold-2792_1	4P_14_F	5’-TGCTCTGTCTGCTCTGTCTG	4P, 4PS	4PS	62 °C	4AS, 4BL, 4DL
		4P_14_R	5’-CCCAGCATGTGTCATCTGGT
ocwgm036	4P_scaffold-6401_1	4P_16_F	5’-TGCCAAATCTGCAATACGGT	4P, 4PS	4PS	62 °C	4AS, 4BL, 4DL
		4P_16_R	5’-AGAATCTGTGCCAGCCAACA
ocwgm037	4P_scaffold-5427_1	4P_18_F	5’-CCGTATGAGCTCGTGACTCC	4P, 4PS	4PS	62 °C	4AS, 4BL, 4DL
		4P_18_R	5’-GGTTTCCCCTCTGTCCTTGG
ocwgm038	4P_scaffold-739_1	4Pb_8_F	5’-CGGGAGTTTCTTACCGGCAT	4P, 4PS	4PS	57 °C	4AS, 4BL, 4DL
		4Pb_8_R	5’-ACAGAAGGACCAGGCATGTG
ocwgm039	4P_scaffold-5906_1	4P_2_F	5'-AGCATCTGAATGAGCTCACCA	4P	4PL	62 °C	4AL, 4BS, 4DS
		4P_2_R	5'-GCTTTGTGCTGTCCTGCAAA
ocwgm040	4P_scaffold-1927_1	4P_4_F	5’-TTGCCACCTTCCACTGTTTT	4P	4PL	62 °C	4DS
		4P_4_R	5’-GGTGCGGATTCGATTTGGTG
ocwgm041	4P_scaffold-6812_1	4P_6_F	5’-ACTGCTACACTTTGGTGGCA	4P	4PL	62 °C	4AL, 4BS, 4DS
		4P_6_R	5’-TGGCATGGACACATCTCAACA
ocwgm042	4P_scaffold-1841_1	4P_8_F	5’-GACTCGTGGTATGTTCGCCA	4P	4PL	62 °C	4AL, 4BS, 4DS
		4P_8_R	5’-CTAGAAACCAGTCCCCTGCC
ocwgm043	4P_scaffold-11762_1	4P_9_F	5’-ATTTCCAGGTCGCCATAGGG	4P	4PL	62 °C	4AL, 4BS, 4DS	4AL, 4BS - duplication
		4P_9_R	5’-GGCCCAGACTAGAGCACATC
ocwgm044	4P_scaffold-9188_1	4P_10_F	5’-CTGGTACGACGAGGGCATTT	4P	4PL	62 °C	4AL, 4BS, 4DS
		4P_10_R	5’-TGCTTTTGATGATCTGCATGGT
ocwgm045	5P_scaffold-19934_1	5Pb_8_F	5’-GCGCACTCTCTCCTGTGTTA	5P	5PS	57 °C	5AS, 5BS, 5DS
		5Pb_8_R	5’-CGAAGAAGGGAGGCCATGTT
ocwgm046	5P_scaffold-5393_1	5Pb_13_F	5’-ACGAGCTTTGACCACGTCAT	5P, 5PL	5PL	62 °C	5AL, 5BL, 5DL	5AL - duplication
		5Pb_13_R	5’-GATCTGTAATCGCCAGCGGA
ocwgm047	5P_scaffold-168676_1	5Pb_16_F	5’-ACATGAAAACACCAGACCAGA	5P, 5PL	5PL	57 °C	5AL, 5BL, 5DL
		5Pb_16_R	5’-GTGCTTCGAACTGTCAGGGA
ocwgm048	5P_scaffold-169119_2	5Pb_19_F	5’-GACACTTTTTGCCACGCCAT	5P, 5PL	5PL	62 °C	5DL
		5Pb_19_R	5’-CTGCTACGTGTCGCATGTTG
ocwgm049	6P_scaffold-3723_1	6P_2_F	5’-CGGCAGCAAACCTTTCCCTA	6P, 6PS	6PS	62 °C	6AS, 6BS, 6DS	6AS - duplication
		6P_2_R	5’-ACCGTCGCATCATGTTACCA
ocwgm050	6P_scaffold-18087_1	6P_3_F	5’-TGAGCAACTCTGAACCAGGC	6P, 6PS	6PS	62 °C	6AS, 6AL, 6BS, 6DS
		6P_3_R	5’-GCACACAGCACACTACTCCT
ocwgm051	6P_scaffold-17480_1	6P_4_F	5’-ATGCAATGAAGGGCGAGACA	6P, 6PS	6PS	62 °C	6AS, 6BS, 6DS
		6P_4_R	5’-CGTGTTGGAAATCATATACACTGCA
ocwgm052	6P_scaffold-11653_1	6P_5_F	5’-ACCATGCGCGATAGTAGAGC	6P, 6PS	6PS	62 °C	6AS, 6BL, 6DS	6AS - duplication
		6P_5_R	5’-CGGGGGCGTCATAGAAGAAG
ocwgm053	6P_scaffold-6955_1	6P_6_F	5’-GGGCTCCGATCTTTCTCGAG	6P, 6PS	6PS	62 °C	6AS, 6BS, 6DS	6AS - duplication
		6P_6_R	5’-CCACTATCGCCGCCAAAATG
ocwgm054	6P_scaffold-62751_1	6Pb_2_F	5’-GAAGAGAGGAGGCGGGAAAC	6P, 6PS	6PS	55 °C	6AS, 6BS, 6DS	6AS, 6BS - duplication
		6Pb_2_R	5’-CCGCAGAAGCAGAGCTACAA
ocwgm055	6P_scaffold-43233_1	6Pb_3_F	5’-TCTTCACATTTGGCCACCTGT	6P, 6PS	6PS	55 °C	6AS, 6BS, 6DS
		6Pb_3_R	5’-AGGGAAGGCTCAACTTGATGT
ocwgm056	6P_scaffold-2680_1	6Pb_5_F	5’-ACTGCCTATTGCCAACAACA	6P, 6PS	6PS	57 °C	6AS, 6BS, 6DS
		6Pb_5_R	5’-TAGGTGGCCGTGATCAGGTA
ocwgm057	6P_scaffold-2571_1	6P_16_F	5’-GGGATGAGTGTATGCGCGTA	6P, 6PL	6PL	62 °C	6AL, 6DL
		6P_16_R	5’-TTTTTGCTGCTTCGCTTGCT
ocwgm058	6P_scaffold-15383_1	6P_17_F	5’-CAACATGCTTGCACGGTCAA	6P, 6PL	6PL	62 °C	6AL, 6BL, 6DL
		6P_17_R	5’-GCAGTACGCGGCATTTTCAT
ocwgm059	1P_scaffold-41617_1	1P_13_F	5'-TCACCTCTAGCCTACCCCAA	6PL	6PL	55 °C	1BL, 1DL
		1P_13_R	5'-GCAAACACACACAACCTTGC
ocwgm060	6P_scaffold-9763_1	6P_10_F	5’-ACTTGCCTTCATCACCAGCA	6P	6P	62 °C	6AL, 6DS
		6P_10_R	5’-CTTGAGATAGTGCTCGCGGT
ocwgm061	6P_scaffold-5882_1	6P_12_F	5’-TGTAAGGCATTGTGTGGAGCA	6P	6P	62 °C	6AL, 6BL, 6DL	6AL - duplication
		6P_12_R	5’-TCCCTCCTGAAAGTCCACCA
ocwgm062	6P_scaffold-2957_1	6P_14_F	5’-CTGGGATGTCGAGGAGCTTG	6P	6P	62 °C	6AL, 6BL, 6DL
		6P_14_R	5’-ACCACCAGAATGGGCATTGT
ocwgm063	6P_scaffold-193005_1	6P_18_F	5’-AGGCACCGGTTTGTGATGAT	6P	6P	62 °C	6AL, 6DL
		6P_18_R	5’-TGCCGTATGTGTGCTTACGT
ocwgm064	7P_scaffold-1535_1	7P_5_F	5’-GGGAAGTTTTCAGTTCTTTCGCT	absent on 1P - 6P addition lines, present on gDNA	7P	62 °C	7AL, 7BS, 7DL
		7P_5_R	5’-GTGGAGTGCCCGATATTGCT
ocwgm065	7P_scaffold-32300_1	7P_7_F	5’-TGCCTCGGGTTCTTCTTGTC	absent on 1P - 6P addition lines, present on gDNA	7P	62 °C	7AS, 7BS, 7DL
		7P_7_R	5’-ACCACGTTCGTACATGCTGT
ocwgm066	7P_scaffold-6926_1	7P_12_F	5’-GGTCTCTCTTTCGCTGGCAT	absent on 1P - 6P addition lines, present on gDNA	7P	62 °C	7AL, 7BL, 7DS
		7P_12_R	5’-GGCCGTGCGGTATTTTCTTC
ocwgm067	7P_scaffold-67701_1	7P_13_F	5’-AGTTTAAACGAGAGCTTGGCA	absent on 1P - 6P addition lines, present on gDNA	7P	62 °C	7DS
		7P_13_R	5’-GTACCGCTTAGTAGCCGCTT
ocwgm068	7P_scaffold-2400_1	7P_15_F	5’-GGACATGGTATGACTTTGCCC	absent on 1P - 6P addition lines, present on gDNA	7P	62 °C	7AS, 7BL, 7DS	7BL - duplication
		7P_15_R	5’-TCCCTAGGTCTTCTCGCCAT
ocwgm069	7P_scaffold-20937_1	7P_16_F	5’-GTCAGAGGCACCTTCATGCT	absent on 1P - 6P addition lines, present on gDNA	7P	62 °C	7AL, 7BL, 7DS	7AL - duplication
		7P_16_R	5’-AAGAGCAGTCATGGCTCCAC
ocwgm070	7P_scaffold-1772_1	7P_20_F	5’-GCCTTCATCATGCCCTGTCT	absent on 1P - 6P addition lines, present on gDNA	7P	62 °C	7AL, 7BL, 7DS
		7P_20_R	5’-GCTCGCACTGGAAGACTCTT
ocwgm071	7P_scaffold-12606_1	7Pb_8_F	5’-CAAGTGGTTCGTCTAGCCGT	absent on 1P - 6P addition lines, present on gDNA	7P	62 °C	7DS
		7Pb_8_R	5’-TCTCCAAAACCCGGGGAAAG
ocwgm072	7P_scaffold-5537_1	7Pb_9_F	5’-CCAAACAGGGCCTAGATGCA	absent on 1P - 6P addition lines, present on gDNA	7P	62 °C	7AL, 7BL, 7DS
		7Pb_9_R	5’-CCGCCTGAAAGTGATGGCTA

## Sheet: Mapped to more chromosomes
Table S4: Sequences of SSR primer pairs developed in our study. Part B: Sequences of SSR markers for A. cristatum mapped to more chromosomes.
Marker name	Scaffold name	Primer name	Primer sequence (5' - 3')	Mapping on addition lines	Specific to chromosome or chromosomal arm	Annealing temperature	Location in wheat	Location in wheat (note)
ocwgm073	1P_scaffold-3294_1	1P_5_F	5'-ACGCTTGGTGTTCTATGCCA	1P, 3P+3PS, 3PS, 5P, 5PL, 6P, 6PS	1P, 3PS, 5PL, 6PS	62 °C	1DS
		1P_5_R	5'-ACCCTGTTCCTCCATTGCAA
ocwgm074	1P_scaffold-14012_1	1P_11_F	5'-AGGTCGACCCTCACTTCTTT	1P, 1PS+1BL, 2PS, 3P+3PS, 3PS	1PS+1BL, 2PS, 3PS	62 °C	1AS, 1DL
		1P_11_R	5'-TAAAGAAAGCGCTGGGTGGG
ocwgm075	1P_scaffold-943_1	1P_18_F	5'-TCACACCAAAATGCTACCTGC	2PL, 5P	2PL, 5P	57 °C	1BL, 1DL
		1P_18_R	5'-CAACTGTGAGGGCCGTTTTG
ocwgm076	3P_scaffold-11557_1	3P_7_F	5'-GAGAGAGGGGGTGGACTGAT	3P+3PS, 4P	3PL, 4P	62 °C	3AS, 3AL, 3BS, 3BL, 3DS	3AL, 3BS, 3BL - duplication
		3P_7_R	5'-CGTAGGACCAGCACCAACTT
ocwgm077	3P_scaffold-7916_1	3P_9_F	5'-CGCGTTTGAATGGTCAGTCC	2P, 2PS, 3P+3PS, 3PS, 4P, 4PS, 5P, 5PL, 6P, 6PS, 6PL	2PS, 3PS, 4PS, 5PL, 6P	62 °C	3AS, 3BL, 3DS
		3P_9_R	5'-TAACCACCCATGCACACCTC
ocwgm078	3P_scaffold-174515_2	3Pb_18_F	5'-AGAGCGAGCCTGCTTATCAG	3P+3PS, 6PL	3PL, 6PL	57 °C	3AL, 3BS, 3BL, 3DL	3BS - duplication
		3Pb_18_R	5'-ACATGGCGGGTGAATCCAAT
ocwgm079	3P_scaffold-32245_1	3Pc_2_F	5'-CCCATCTGATCGTTCGAGCA	2P, 2PS, 3P+3PS	2PS, 3PL	55 °C	3BL, 3DS
		3Pc_2_R	5'-TCCAACAGAACGTTCCCCAG
ocwgm080	4P_scaffold-446_1	4P_3_F	5'-GGTCAGTGCATCCTACTCCC	3P+3PS, 4P	3PL, 4P	57 °C	4AL, 4BS, 4DS	4AL - duplication
		4P_3_R	5'-AAACAATACCGCCTTTGCTTT
ocwgm081	5P_scaffold-307_1	5P_2_F	5’-TGGTCCTTCCCTCCTTGTCA	1PS+1BL, 5P	1PS+1BL, 5P	62 °C	5AL, 5BS, 5DS
		5P_2_R	5’-CACATCTGGTCCCTTGCACT
ocwgm082	5P_scaffold-46371_1	5P_8_F	5'-GCGTGTAGACTTGAGGGCTT	2P, 2PS, 2PL, 3P+3PS, 3PS, 4P, 4PS, 5P	2P, 3PS, 4PS, 5P	62 °C	5BS, 5DS
		5P_8_R	5'-GGATCCTTCCACTTGGGGTC
ocwgm083	5P_scaffold-6566_1	5P_17_F	5'-ATTGGAAATGGTGGACGGGC	1P, 5P, 5PL, 6P, 6PL	1P, 5PL, 6PL	57 °C	5BS, 5DL
		5P_17_R	5'-ATTCCGGCCCAAAACCAGAA
ocwgm084	5P_scaffold-3978_1	5Pb_17_F	5'-ATGCTCAGGATGCTACTGCC	2P, 2PS, 4P, 5P, 5PL, 6P	2PS, 4P, 5PL, 6P	62 °C	5AL, 5DL
		5Pb_17_R	5'-TGCTTGGTTGCTTCCTCCTC
ocwgm085	6P_scaffold-143491_1	6P_1_F	5'-CCCATGCAGGCCCTGTAAAA	1P, 5P, 5PL, 6P, 6PS, 6PL	1P, 5PL, 6P	57 °C	6DS
		6P_1_R	5'-TTGCCATGAATGTAGGGGGC
ocwgm086	6P_scaffold-130899_1	6P_15_F	5'-GCAGCAACAGAACCAAGTGG	2P, 2PS, 2PL, 6P, 6PS	2P, 6PS	62 °C	6AS, 6BS, 6DL	6AS, 6BS - duplication
		6P_15_R	5'-GCAACGCACGTCTCAAATGT
ocwgm087	6P_scaffold-8085_1	6P_19_F	5'-ACCGTCGTTCCGATCGAAAA	2P, 2PL, 6P	2PL, 6P	62 °C	6AL, 6BL, 6DL
		6P_19_R	5'-ACGTAACTCGGCCTGGTAAC
ocwgm088	6P_scaffold-24178_1	6Pb_9_F	5'-GTTGCATTGCAGTTGCTTGC	2P, 2PL, 6P, 6PL	2PL, 6PL	62 °C	6AL, 6BL, 6DL
		6Pb_9_R	5'-TGACTGCCTAGCTGCAAAGT

## Sheet: Mapped to all chromosomes
Table S4: Sequences of SSR primer pairs developed in our study. Part C: Sequences of SSR markers for A. cristatum mapped to all chromosomes.
Marker name	Primer name	Primer sequence (5' - 3')	Mapping on addition lines	Specific to chromosome or chromosomal arm	Note	Annealing temperature	Location in wheat	Location in wheat (note)
ocwgm089	1P_8_F	5'-CTTTCTCCTTCACGAGGCCA	1P, 1PS+1BL, 2P, 2PS, 2PL, 3P+3PS, 3PS, 4P, 5P, 5PL, 6P, 6PS, 6PL	1PS+1BL, 2P, 3PS, 4P, 5PL, 6P	absent on 4PS	62 °C	1AL, 1BS, 1DS
	1P_8_R	5'-GGTAGCCCTGAGGATGTTGT
ocwgm090	1Pb_10_F	5'-TGGGGAAACAATGCGGATGA	1P, 1PS+1BL, 2P, 2PS, 3P+3PS, 3PS, 4P, 4PS, 5P, 5PL, 6P, 6PS, 6PL	1PS+1BL, 2PS, 3PS, 4PS, 5PL, 6P	absent on 2PL	57 °C	1AL, 1BS, 1DS
	1Pb_10_R	5'-GTACTATGCCCGTTCCTCCG
ocwgm091	1Pb_12_F	5'-CCTTTTCTCTATTTCTCTTCTTTTTCG	1P, 1PS+1BL, 2P, 2PS, 2PL, 3P+3PS, 3PS, 4P, 4PS, 5P, 5PL, 6PL	1PS+1BL, 2P, 3PS, 4PS, 5PL, 6PL	absent on 6P, 6PS	57 °C	1DL
	1Pb_12_R	5'-ACACGAACATTTCTTGAAATTCGA
ocwgm092	1Pb_15_F	5'-GCGGTGCATCAATTGAAGCA	1P, 1PS+1BL, 2P, 2PS, 2PL, 3P+3PS, 3PS, 4P, 4PS, 5P, 5PL, 6PS, 6PL	1PS+1BL, 2P, 3PS, 4PS, 5PL, 6P	absent on 6P	62 °C	1AL, 1BL, 1DL
	1Pb_15_R	5'-CGGACATTCAACCTCCCCTC
ocwgm093	1Pb_17_F	5'-CCTCAAGTGCCACACTAACCA	1P, 1PS+1BL, 2P, 2PL, 3P+3PS, 3PS, 4P, 4PS, 5P, 5PL, 6P, 6PS, 6PL	1PS+1BL, 2PL, 3PS, 4PS, 5PL, 6P	absent on 2PS	62 °C	1AL, 1BL, 1DL
	1Pb_17_R	5'-GTTGAGAGTGCAAAAGGCCG
ocwgm094	1Pb_18_F	5'-GGCTCCTCCAGTCTTACACG	1P, 2P, 3P+3PS, 3PS, 4P, 4PS, 5P, 5PL, 6P, 6PS, 6PL	1P, 2P, 3PS, 4PS, 5PL, 6P	absent on 1PS+1BL, 2PS, 2PL	62 °C	1BS, 1DL
	1Pb_18_R	5'-TGACCAGAGATACTGCTCACA
ocwgm095	2Pb_4_F	5'-GTGTGTGCTGCATGTGTACG	1P, 1PS+1BL, 2P, 2PL, 3P+3PS, 3PS, 4P, 4PS, 5P, 5PL, 6P, 6PL	1PS+1BL, 2PL, 3PS, 4PS, 5PL, 6PL	absent on 2PS, 6PS	62 °C	2DS
	2Pb_4_R	5'-CACACATTGACACGTGGGGA
ocwgm096	3P_8_F	5'-ATACCCAAACGCCCGAAAGT	1P, 1PS+1BL, 2P, 2PS, 3P+3PS, 4P, 4PS, 5P, 5PL, 6P, 6PS, 6PL	1PS+1BL, 2PS, 3PL, 4PS, 5PL, 6P	absent on 2PL, 3PS	62 °C	3AS, 3BL, 3DS
	3P_8_R	5'-GTACATACCCCCAGCCCCTA
ocwgm097	3P_14_F	5'-GTGAGACCCGGCTCTCAAAA	1P, 2P, 2PS, 3P+3PS, 3PS, 4P, 4PS, 5P, 5PL, 6P, 6PS, 6PL	1P, 2PS, 3PS, 4PS, 5PL, 6P	absent on 1PS+1BL, 2PL	62 °C	3AL, 3BL, 3DL
	3P_14_R	5'-GGTCATCTTTGTGACCCGGT
ocwgm098	3P_18_F	5'-GGGGGCTATCTCAATGGAGC	1P, 2P, 2PS, 2PL, 3P+3PS, 3PS, 4P, 4PS, 5P, 5PL, 6P, 6PS	1P, 2P, 3PS, 4PS, 5PL, 6PS	absent on 1PS+1BL, 6PL	62 °C	3DL
	3P_18_R	5'-TCCGTGTTCGTGGAGGAAAC
ocwgm099	3Pb_17_F	5'-CACCTCGCTCCGTCTTCTC	1P, 2PL, 3P+3PS, 3PS, 4P, 4PS, 5P, 5PL, 6P, 6PS, 6PL	1P, 2PL, 3PS, 4PS, 5PL, 6P	absent on 1PS+1BL, 2P, 2PS	57 °C	3AL, 3BL, 3DL
	3Pb_17_R	5'-GGAACTACGGCGTCAGACAA
ocwgm100	3Pc_6_F	5'-GTGGGAAACGCAAAGGCTTT	1P, 1PS+1BL, 2P, 2PS, 2PL, 3PS, 4P, 5P, 5PL, 6P, 6PS, 6PL	1PS+1BL, 2P, 3PS, 4P, 5PL, 6P	absent on 3P+3PS, 4PS	62 °C	3AS, 3AL, 3BL, 3DL
	3Pc_6_R	5'-GACCCGAATCAATCAACGCG
ocwgm101	4Pb_2_F	5'-TCCAGAACACGGAGCACTTC	1P, 1PS+1BL, 2P, 2PS, 2PL, 3P+3PS, 4P, 4PS, 5P, 5PL, 6P, 6PS, 6PL	1PS+1BL, 2P, 3PL, 4PS, 5PL, 6P	absent on 3PS	57 °C	4AL, 4BS, 4DS	4BS - duplication
	4Pb_2_R	5'-GGAGGAGGTCCATGTCAAGC
ocwgm102	4Pb_4_F	5'-GGAGGACATGGAGGCACTTC	1P, 1PS+1BL, 2P, 2PS, 2PL, 3P+3PS, 4P, 4PS, 5P, 5PL, 6P, 6PS, 6PL	1PS+1BL, 2P, 3PL, 4PS, 5PL, 6P	absent on 3PS	62 °C	4AL, 4BS, 4DS
	4Pb_4_R	5'-CTGCCAACAAGTAAGCCAGC
ocwgm103	5P_15_F	5'-AAGCTTTGTCCGGAGTCAAA	1P, 1PS+1BL, 2P, 2PL, 3P+3PS, 3PS, 4P, 5P, 5PL, 6P, 6PS, 6PL	1PS+1BL, 2PL, 3PS, 4P, 5PL, 6P	absent on 2PS, 4PS	57 °C	5AS, 5BL, 5DL
	5P_15_R	5'-TCCGGTCCTTTTTACTCCGC
ocwgm104	7P_11_F	5'-GCCGTCCAGAACTAGTTCCC	1P, 1PS+1BL, 2P, 2PL, 3P+3PS, 3PS, 4P, 4PS, 5P, 5PL, 6P, 6PS, 6PL	1PS+1BL, 2PL, 3PS, 4PS, 5PL, 6P	absent on 2PS	62 °C	7AL, 7BL, 7DS
	7P_11_R	5'-TGCCAACCCTACCCCTTAGT
ocwgm105	1P_14_F	5'-GTAGGTAACGCCACCACCAA	all*	1PS+1BL, 2P, 3PS, 4PS, 5PL, 6P		62 °C	1AL, 1BL, 1DL
	1P_14_R	5'-TGGGGTCCGATCACATTCAC
ocwgm106	1P_15_F	5'-AAAATCAATTCCAGCCGCCG	all*	1PS+1BL, 2P, 3PS, 4PS, 5PL, 6P		62 °C	1AS, 1BL, 1DL
	1P_15_R	5'-GATCCCAACAAACACACCGC
ocwgm107	1P_17_F	5'-AATCGGGACCCTTTTCTGGC	all*	1PS+1BL, 2P, 3PS, 4PS, 5PL, 6P		62 °C	1AS, 1BS, 1DL
	1P_17_R	5'-GGCAGCAAAACCTCAAAGGG
ocwgm108	1P_19_F	5'-TGATCGTTGCTCAACACAGC	all*	1PS+1BL, 2P, 3PS, 4PS, 5PL, 6P		62 °C	1AL, 1BL, 1DL	1BL - duplication
	1P_19_R	5'-AAGTTGCAAAAGCCTGCTCT
ocwgm109	1Pb_2_F	5'-AGCTGAGTTTCGGACATGCT	all*	1PS+1BL, 2P, 3PS, 4PS, 5PL, 6P		57 °C	1AS, 1BS, 1DS
	1Pb_2_R	5'-AATGCCTTTCGTGCACCAAG
ocwgm110	1Pb_8_F	5'-CGAGCCATGGACATAGCACT	all*	1PS+1BL, 2P, 3PS, 4PS, 5PL, 6P		55 °C	1AS, 1AL, 1DS	1AS - duplication, 1AL - triplication
	1Pb_8_R	5'-ACGTGGGAATTTCTTGGGAGT
ocwgm111	1Pb_9_F	5'-AGTCTACCTTCCGCTGCATG	all*	1PS+1BL, 2P, 3PS, 4PS, 5PL, 6P		57 °C	1AS, 1BL, 1DS
	1Pb_9_R	5'-ACACAGAACAAGGGAGCACC
ocwgm112	1Pb_14_F	5'-CGTGGGTGGTTTACTTCGGA	all*	1PS+1BL, 2P, 3PS, 4PS, 5PL, 6P		57 °C	1AS, 1BL, 1DL
	1Pb_14_R	5'-ACCGGGGGACAGATAGGAAA
ocwgm113	1Pb_16_F	5'-TCTGGAGAGCCACCGACATA	all*	1PS+1BL, 2P, 3PS, 4PS, 5PL, 6P		57 °C	1AL, 1BL, 1DL	1BL - duplication
	1Pb_16_R	5'-CTCCTTCTGCCCTCCCTTTG
ocwgm114	1Pb_19_F	5'-TCTTGTCGTTTCCGGCGTTA	all*	1PS+1BL, 2P, 3PS, 4PS, 5PL, 6P		57 °C	1AL, 1BS, 1DL
	1Pb_19_R	5'-GGAGAATGGAGCACCGGAAT
ocwgm115	1Pb_20_F	5'-CTACATGTAACCCGCCCCTC	all*	1PS+1BL, 2P, 3PS, 4PS, 5PL, 6P		57 °C	1AL, 1BL, 1DL
	1Pb_20_R	5'-TCACGGTGGAGGTAAAAGCC
ocwgm116	2P_3_F	5'-GGACCCCCACACTTATCCCT	all*	1PS+1BL, 2P, 3PS, 4PS, 5PL, 6P		62 °C	2AL, 2BL, 2DS
	2P_3_R	5'-CAGTAGCACCAAGAGCAGCT
ocwgm117	2P_5_F	5'-GTGCCATGACCATGCAGTTG	all*	1PS+1BL, 2P, 3PS, 4PS, 5PL, 6P		62 °C	2AL, 2BL, 2DS
	2P_5_R	5'-CTAGCATCCAACCAGCGCTA
ocwgm118	2P_16_F	5'-TTTGGACTAATCACGGGGCC	all*	1PS+1BL, 2P, 3PS, 4PS, 5PL, 6P		62 °C	2AL, 2BS, 2DL
	2P_16_R	5'-CTCCCCCATGACACCATCAC
ocwgm119	2Pb_5_F	5'-TAGATCGCCGTCACACGATG	all*	1PS+1BL, 2P, 3PS, 4PS, 5PL, 6P		57 °C	2AS, 2BL, 2DS
	2Pb_5_R	5'-AAACGGTGAAGGGCCAGATC
ocwgm120	2Pb_6_F	5'-AGAAGCAGAGTTCGTCACGG	all*	1PS+1BL, 2P, 3PS, 4PS, 5PL, 6P		57 °C	2AL, 2BL, 2DL
	2Pb_6_R	5'-TGCTGTGGTGTGTCAGTGTT
ocwgm121	2Pb_8_F	5'-CTCTGGTCTCTGGTGCGTTT	all*	1PS+1BL, 2P, 3PS, 4PS, 5PL, 6P		57 °C	2AL, 2BS, 2BL, 2DL
	2Pb_8_R	5'-GAGCTGTCGCCGATGAGTAA
ocwgm122	3P_3_F	5'-GGGTAGGTTGAGGTGGAGCT	all*	1PS+1BL, 2P, 3PS, 4PS, 5PL, 6P		62 °C	3AS, 3BS, 3DS
	3P_3_R	5'-GTCCCGTGGAAGTGAAGGAG
ocwgm123	3Pb_10_F	5'-AGAACACAACCACACCAGCA	all*	1PS+1BL, 2P, 3PS, 4PS, 5PL, 6P		62 °C	3AL, 3BS, 3DS
	3Pb_10_R	5'-GTGTGTGTGTGATGTGCCAC
ocwgm124	3Pb_12_F	5'-CAGCCAGAGTGGTGGAAGAG	all*	1PS+1BL, 2P, 3PS, 4PS, 5PL, 6P		55 °C	3AL, 3BL, 3DL
	3Pb_12_R	5'-ACACGGAGAAGGGAAGCAAG
ocwgm125	3Pb_14_F	5'-CAGATTCGCGGGAGAGGATG	all*	1PS+1BL, 2P, 3PS, 4PS, 5PL, 6P		57 °C	3AL, 3BL, 3DL
	3Pb_14_R	5'-CATAGGAGGAGGCCAGAGGA
ocwgm126	3Pc_7_F	5'-TCTGCAAGCAAGAGAAGCGA	all*	1PS+1BL, 2P, 3PS, 4PS, 5PL, 6P		57 °C	3AL, 3BL, 3DL
	3Pc_7_R	5'-GAAGGTGCTGTAAGACCCCC
ocwgm127	3Pc_8_F	5'-AGAGTCCGTTTGCCTTGGTT	all*	1PS+1BL, 2P, 3PS, 4PS, 5PL, 6P		57 °C	3AL, 3BL, 3DL
	3Pc_8_R	5'-TTCAAGGATGGCGTACACCC
ocwgm128	3Pc_10_F	5'-GTCGGGCTCCTCGATGAC	all*	1PS+1BL, 2P, 3PS, 4PS, 5PL, 6P		57 °C	3BL, 3DL
	3Pc_10_R	5'-GAGGAGGAGGACGACGAGG
ocwgm129	4P_5_F	5'-GCGCTGCTGCTAGTATTCCT	all*	1PS+1BL, 2P, 3PS, 4PS, 5PL, 6P		57 °C	4AL, 4BL, 4DS	4BL - duplication
	4P_5_R	5'-GTGCCATGACCATGCAGTTG
ocwgm130	4P_19_F	5'-CAGGCTGCCAAAGAAGCAAG	all*	1PS+1BL, 2P, 3PS, 4PS, 5PL, 6P		55 °C	4AS, 4BL, 4DL
	4P_19_R	5'-GCATCATCTTTGCGGGTCAC
ocwgm131	4Pb_1_F	5'-CAAGCAAAGAAGCAGCAGCA	all*	1PS+1BL, 2P, 3PS, 4PS, 5PL, 6P		57 °C	4AL, 4BS, 4DS
	4Pb_1_R	5'-TCTCCTTCCGCTATCCCCAA
ocwgm132	4Pb_9_F	5'-AGTGAGCTCTTTGGGTGTGC	all*	1PS+1BL, 2P, 3PS, 4PS, 5PL, 6P		55 °C	4AS, 4BL, 4DL
	4Pb_9_R	5'-TGCTCGGGATCCCTGATCTT
ocwgm133	5P_1_F	5'-AGGATCCAGAAGCGTTTCGG	all*	1PS+1BL, 2P, 3PS, 4PS, 5PL, 6P		62 °C	5AL, 5BL, 5DS
	5P_1_R	5'-CCAATTCGGCCTCCTTCCTT
ocwgm134	5P_4_F	5'-TCCGCAGTTCACTCATCGAG	all*	1PS+1BL, 2P, 3PS, 4PS, 5PL, 6P		62 °C	5AS, 5BS, 5DS
	5P_4_R	5'-TGCAGGTTCCTGGGATCCTA
ocwgm135	5P_6_F	5'-ACTCTTGCTCGAACTCGTGA	all*	1PS+1BL, 2P, 3PS, 4PS, 5PL, 6P		62 °C	5AL, 5BL, 5DS
	5P_6_R	5'-CAACCTCCTTCTCCACCACC
ocwgm136	5P_12_F	5'-CTCCATCGGGTCTGAGGGTA	all*	1PS+1BL, 2P, 3PS, 4PS, 5PL, 6P		62 °C	5AL, 5BL, 5DL
	5P_12_R	5'-TGCAAGCCATATATCGTGTGC
ocwgm137	5P_14_F	5'-TATGTGCCAGTTGTGCTCGT	all*	1PS+1BL, 2P, 3PS, 4PS, 5PL, 6P		62 °C	5AL, 5BL, 5DL
	5P_14_R	5'-CTTCATGTTGTTCGGCCTGC
ocwgm138	5Pb_1_F	5'-CGACGCCCATCTTCTGCTAT	all*	1PS+1BL, 2P, 3PS, 4PS, 5PL, 6P		62 °C	5AL, 5BL, 5DS	5AL, 5BL - duplication
	5Pb_1_R	5'-GAGAGGAGATGGTGCTGGTG
ocwgm139	5Pb_6_F	5'-GCGAGTGATTCTCCCGGAAT	all*	1PS+1BL, 2P, 3PS, 4PS, 5PL, 6P		57 °C	5AS, 5BS, 5DS
	5Pb_6_R	5'-CCTCATTATCCACCACCGCA
ocwgm140	5Pb_7_F	5'-CCCTCTCCAAACCCTTCACC	all*	1PS+1BL, 2P, 3PS, 4PS, 5PL, 6P		62 °C	5BS, 5DS
	5Pb_7_R	5'-TCCACCCCACCTCAAATTCG
ocwgm141	5Pb_9_F	5'-CTCTGGGCGTTTCCTTTGGA	all*	1PS+1BL, 2P, 3PS, 4PS, 5PL, 6P		62 °C	5AL, 5BL, 5DS
	5Pb_9_R	5'-AACCATGCCTCTCACGGAAG
ocwgm142	5Pb_11_F	5'-CTCCTCTGACTCCTCCACCA	all*	1PS+1BL, 2P, 3PS, 4PS, 5PL, 6P		57 °C	5AL, 5BL, 5DL
	5Pb_11_R	5'-TCCACAGATGCAAGAAGCCA
ocwgm143	5Pb_12_F	5'-AAAGTGGTCACCGGTCAGGC	all*	1PS+1BL, 2P, 3PS, 4PS, 5PL, 6P		55 °C	5AL, 5BL, 5DL
	5Pb_12_R	5'-GACTGGTGCATGGCTTGTTG
ocwgm144	5Pb_14_F	5'-TGTGCTACATTGTGCTAGAGTGA	all*	1PS+1BL, 2P, 3PS, 4PS, 5PL, 6P		62 °C	5AL, 5BL, 5DL
	5Pb_14_R	5'-TGGGCACTTTTGATCGATCCA
ocwgm145	5Pb_15_F	5'-ATTATCCTCCCGAACGTCGC	all*	1PS+1BL, 2P, 3PS, 4PS, 5PL, 6P		55 °C	5AL, 5BL, 5DL
	5Pb_15_R	5'-GCTGTCAGTGTCAACGGAGA
ocwgm146	5Pb_18_F	5'-GATCTACAGGTGCGGACAGG	all*	1PS+1BL, 2P, 3PS, 4PS, 5PL, 6P		55 °C	5AL, 5BL, 5DL
	5Pb_18_R	5'-CCTCATTCTAGCCAGGCGAG
ocwgm147	5Pb_20_F	5'-GCTTTATCGAGAAGCACGGC	all*	1PS+1BL, 2P, 3PS, 4PS, 5PL, 6P		62 °C	5BL, 5DL
	5Pb_20_R	5'-TTTAACCGTGCGCCCAAATC
ocwgm148	6P_8_F	5'-GGTGACCAATGCTGCTGTTC	all*	1PS+1BL, 2P, 3PS, 4PS, 5PL, 6P		62 °C	6AS, 6BS, 6DS
	6P_8_R	5'-ACCTGTCTGTGACCAGCTTT
ocwgm149	6Pb_10_F	5'-TGCCTGTAAGATCTGCCCAC	all*	1PS+1BL, 2P, 3PS, 4PS, 5PL, 6P		62 °C	6AL, 6BL, 6DL	6BL - duplication
	6Pb_10_R	5'-GCTACCTTCCCCTCGTCTCT
ocwgm150	7P_2_F	5'-TGCTGGATCTGGGAGGATGA	all*	1PS+1BL, 2P, 3PS, 4PS, 5PL, 6P		62 °C	7AS, 7AL, 7BL, 7DL	7AS, 7AL - duplication
	7P_2_R	5'-GAGCACGTCCTTGAGTGGTT
ocwgm151	7P_4_F	5'-GGACCCTTGGGTATGCATCC	all*	1PS+1BL, 2P, 3PS, 4PS, 5PL, 6P		62 °C	7AS, 7BS, 7DL
	7P_4_R	5'-TCTGGCCGACCTCTACATCA
ocwgm152	7P_6_F	5'-GCTCAAATTTCCAGGAGGCC	all*	1PS+1BL, 2P, 3PS, 4PS, 5PL, 6P		62 °C	7AS, 7BL, 7DL	7AS - duplication
	7P_6_R	5'-ACATGTAACTGTACTCATTTGCAA
ocwgm153	7P_9_F	5'-GCAAGCTCAACATGTTGGAGG	all*	1PS+1BL, 2P, 3PS, 4PS, 5PL, 6P		62 °C	7AL, 7BS, 7DL
	7P_9_R	5'-TGTCGCATGAAACTTGTTGTT
ocwgm154	7P_18_F	5'-AACGGTTGGATTTTGGGGGA	all*	1PS+1BL, 2P, 3PS, 4PS, 5PL, 6P		62 °C	7AL, 7DS
	7P_18_R	5'-GCTCCGAAGTGACCTCTTCC
ocwgm155	7P_19_F	5'-CCTCATGAGGGATAAGCATGACT	all*	1PS+1BL, 2P, 3PS, 4PS, 5PL, 6P		62 °C	7AL, 7BL, 7DS
	7P_19_R	5'-CCCTGTAGGAATTGTGAAAGACG
ocwgm156	7Pb_1_F	5'-TGCACTGTCTCTCTGTTTGTCA	all*	1PS+1BL, 2P, 3PS, 4PS, 5PL, 6P		62 °C	7AS, 7DL
	7Pb_1_R	5'-ACGCGCACACACAAATACAC
ocwgm157	7Pb_3_F	5'-TCATTTTGGCTAGGCACCCC	all*	1PS+1BL, 2P, 3PS, 4PS, 5PL, 6P		55 °C	7AS, 7BS, 7DL
	7Pb_3_R	5'-AGCGTCAGAAGAGCAGGTTC
ocwgm158	7Pb_5_F	5'-TTTCTATCTCCGTGGGCCAC	all*	1PS+1BL, 2P, 3PS, 4PS, 5PL, 6P		62 °C	7AS, 7BL, 7DL
	7Pb_5_R	5'-GGAGTGCGTGTGCCTATGAT
ocwgm159	7Pb_10_F	5'-TGCTAATTGTTTTTATTATGGCGAACA	all*	1PS+1BL, 2P, 3PS, 4PS, 5PL, 6P		57 °C	7DS
	7Pb_10_R	5'-GCGTCGCTACTGGAAGTCTT
*mapped on all analyzed addition lines
