# Supplementary material for: Draft Sequencing Crested Wheatgrass Chromosomes Identified Evolutionary Structural Changes and Genes and Facilitated the Development of SSR Markers
Source: Int J Mol Sci. 2022 Mar 16;23(6):3191. doi: 10.3390/ijms23063191 (PMC8948999; doi:10.3390/ijms23063191)
Supplement: Supplementary file 1 [file ijms-23-03191-s001.zip › TableS5.xlsx]

## Sheet: Table S5
Table S5: Annotated genes connected with newly developed SSR markers.
Chromosome position	Annotated genes	Start position of gene on scaffold	End position of gene on scaffold	Gene length [bp]	Scaffold name	Scaffold length [bp]	% of gene on scaffold	Start position of marker on scaffold	End position of marker on scaffold	Marker length [bp]	SSR marker	Note
AGROCRI.2P.001633.1	Serine/threonine-protein kinase svkA	27	1838	1812	2P.scaffold-14485	3612	50.1661	2136	2303	168	ocwgm009	specific for 2PS
AGROCRI.2P.001174.1	Zeta-carotene desaturase	896	3765	2870	2P.scaffold-18772	4845	59.2363	4277	4530	254	ocwgm010	specific for 2PS
AGROCRI.2P.002734.1	Expansin-B18	668	2081	1414	2P.scaffold-12201	2575	54.9126	2356	2563	208	ocwgm016	specific for 2PL
AGROCRI.3P.001288.1	Dephospho-CoA kinase	8812	11531	2720	3P.scaffold-180855	13172	20.6499	4015	4140	126	ocwgm021	specific for 3PS
AGROCRI.3P.006987.1	Probable WRKY transcription factor 13	1	4697	4697	3P.scaffold-6216	9637	48.7392	408	685	278	ocwgm024	specific for 3PS, marker inside of genic sequence
AGROCRI.3P.001297.1	Rac-like GTP-binding protein 1	6994	8451	1458	3P.scaffold-8849	10773	13.5338	901	1175	275	ocwgm026	specific for 3PS
AGROCRI.5P.002340.1	Two-component response regulator-like PRR95	2955	6254	3300	5P.scaffold-168676	12963	25.4571	1814	1976	163	ocwgm047	specific for 5PL
AGROCRI.6P.000022.1	Callose synthase 3	5488	17273	11786	6P.scaffold-9763	17439	67.5842	6358	6606	249	ocwgm060	specific for 6P, marker inside of genic sequence
AGROCRI.6P.000862.1	Cation-transporting ATPase HMA5	188	4414	4227	6P.scaffold-6955	7855	53.8129	4973	5240	268	ocwgm053	specific for 6PS
AGROCRI.6P.000498.1	Inorganic pyrophosphatase TTM2	1227	5945	4719	6P.scaffold-2571	6602	71.4783	77	192	116	ocwgm057	specific for 6PL
AGROCRI.7P.000432.1	Ankyrin repeat domain-containing protein EMB506	1	1699	1699	7P.scaffold-1535	14550	11.677	3376	3598	223	ocwgm064	specific for 7P
AGROCRI.7P.000433.1	tRNA (guanine-N(7)-)-methyltransferase	2826	4134	1309	7P.scaffold-1535	14550	8.99656	3376	3598	223	ocwgm064	specific for 7P, marker inside of genic sequence
AGROCRI.7P.000007.1	Callose synthase 3	4141	15291	11151	7P.scaffold-1772	15334	72.7208	1346	1609	264	ocwgm070	specific for 7P
AGROCRI.1P.000032.1	ABC transporter A family member 8	1216	2828	1613	1P.scaffold-943	14964	10.7792	634	861	228	ocwgm075	mapped on more chromosomes
AGROCRI.1P.000442.1	ABC transporter A family member 7	92	913	822	1P.scaffold-21320	4343	18.927	1702	1934	233	ocwgm093	mapped on all chromosomes
AGROCRI.1P.000443.1	ABC transporter A family member 7	1824	3878	2055	1P.scaffold-21320	4343	47.3175	1702	1934	233	ocwgm093	mapped on all chromosomes, marker partly inside of genic sequence
AGROCRI.3P.000934.1	Vacuolar fusion protein MON1 homolog	4571	8466	3896	3P.scaffold-5219	15934	24.4509	8110	8334	225	ocwgm128	mapped on all chromosomes, marker inside of genic sequence
AGROCRI.4P.000729.1	Inositol-tetrakisphosphate 1-kinase 3	1469	3916	2448	4P.scaffold-6428	4776	51.2563	142	402	261	ocwgm101	mapped on all chromosomes
AGROCRI.4P.001060.1	Exocyst complex component SEC3A	2	744	743	4P.scaffold-5897	1088	68.2904	378	591	214	ocwgm102	mapped on all chromosomes, marker inside of genic sequence
AGROCRI.4P.000582.1	Probable 4-hydroxy-tetrahydrodipicolinate reductase 2	839	4845	4007	4P.scaffold-465	5518	72.6169	4168	4440	273	ocwgm132	mapped on all chromosomes, marker inside of genic sequence
AGROCRI.5P.002912.1	Actin-1	21051	22315	1265	5P.scaffold-3304	25553	4.9505	13753	14020	268	ocwgm133	mapped on all chromosomes
AGROCRI.5P.002819.1	Protein ROOT HAIR DEFECTIVE 3 homolog 1	29	2628	2600	5P.scaffold-43812	2970	87.5421	52	267	216	ocwgm134	mapped on all chromosomes, marker inside of genic sequence
AGROCRI.5P.004707.1	Cationic amino acid transporter 1	12404	14555	2152	5P.scaffold-170512	22319	9.64201	1298	1492	195	ocwgm139	mapped on all chromosomes
AGROCRI.5P.005628.1	40S ribosomal protein S29	7331	8659	1329	5P.scaffold-4149	12905	10.2983	8493	8731	239	ocwgm146	mapped on all chromosomes, marker partly inside of genic sequence
AGROCRI.6P.001471.1	50S ribosomal protein L21	2	3285	3284	6P.scaffold-3766	8276	39.681	2879	3078	200	ocwgm148	mapped on all chromosomes, marker inside of genic sequence
AGROCRI.7P.001212.1	Probable apyrase 3	1936	2883	948	7P.scaffold-3369	4355	21.7681	2282	2560	279	ocwgm151	mapped on all chromosomes, marker inside of genic sequence
AGROCRI.7P.001356.1	Carboxyl-terminal-processing peptidase 3	150	1348	1199	7P.scaffold-3511	2005	59.8005	1781	1995	215	ocwgm152	mapped on all chromosomes
